# Supplementary material for: Cerebrospinal fluid tau levels are associated with abnormal neuronal plasticity markers in Alzheimer’s disease
Source: Mol Neurodegener. 2022 Mar 28;17:27. doi: 10.1186/s13024-022-00521-3 (PMC8962234; doi:10.1186/s13024-022-00521-3)
Supplement: Supplementary file 1 — Additional file 1: Data S1. Participant characteristics. S1a: Characteristics of individuals with CSF Aβ1-42 and tau measurements available; S1b: Characteristics of individuals with CSF proteomic data. Data S2. Protein annotation and statistics of group comparisons of protein levels. Data S3a. Full list of GO biological processes associated with proteins that differ according to group and clinical stage. Data S3b. SynGO enriched synaptic cellular components and biological processes that differ according to group. Data S4a. Estimated marginal means of AD GWAS-based polygenic risk scores in controls, AD individuals with increased t-tau and AD individuals with normal t-tau. Data S4b. Top 1000 SNPS from GWAS on AD individuals with increased t-tau and normal t-tau in pooled ADNI and EMIF-AD MBD cohorts. Data S4c. Difference in MAGMA gene score between AD individuals with increased t-tau and normal t-tau based on t-tau GWAS in pooled ADNI and EMIF-AD MBD cohorts. Data S4d. Difference in GO biological process MAGMA geneset score between AD individuals with increased t-tau and normal t-tau based on t-tau GWAS in pooled ADNI and EMIF-AD MBD cohorts. Data S5a. Correlation between genetic risk score and CSF protein level in individuals with abnormal Aβ1-42. Data S5b. Association of the number of GMNC rs9877502-A risk alleles and number of APOE-e4 alleles with CSF protein concentrations in a linear model in individuals with AD. Data S5c. GO-BP processes enriched for proteins that have a positive or negative association with the number of rs9877502-A risk alleles in an additive model. Data S6. Annual change in imaging measures. [file 13024_2022_521_MOESM1_ESM.xlsx]

## Sheet: Summary
Supplemental data in excel file
Data S1. Participant characteristics. S1a: Characteristics of individuals with CSF Aβ1-42 and tau measurements available; S1b: Characteristics of individuals with CSF proteomic data.
Data S2. Protein annotation and statistics of group comparisons of protein levels
Data S3a. Full list of GO biological processes associated with proteins that differ according to group or clinical stage.
Data S3b. SynGO enriched synaptic cellular components and biological processes that differ according to group or or clinical stage
Data S4a. Estimated marginal means of AD GWAS-based polygenic risk scores in controls, AD individuals with increased t-tau and AD individuals with normal t-tau.
Data S4b. Top 1000 SNPS from GWAS on AD individuals with increased t-tau and normal t-tau in pooled ADNI and EMIF-AD MBD cohorts.
Data S4c. Difference in MAGMA gene score between AD individuals with increased t-tau and normal t-tau based on t-tau GWAS in pooled ADNI and EMIF-AD MBD cohorts.
Data S4d. Difference in GO biological process MAGMA geneset score between AD individuals with increased t-tau and normal t-tau based on t-tau GWAS in pooled ADNI and EMIF-AD MBD cohorts
Data S5a. Correlation between genetic risk score and CSF protein level in individuals with abnormal Aβ1-42.
Data S5b. Association of the number of GMNC rs9877502-A risk alleles and number of APOE-e4 alleles with CSF protein concentrations in a linear model in individuals with AD.
Data S5c. GO-BP processes enriched for proteins that have a positive or negative association with the number of GMNC rs9877502-A risk alleles in an additive model
Data S6. Annual change in imaging measures

## Sheet: Data-S1_Participants
Data S1. Participant characteristics. S1a: Characteristics of individuals with CSF Aβ1-42 and tau measurements available; S1b: Characteristics of individuals with CSF proteomic data.
S1a: Characteristics of individuals with CSF abeta42 and tau measurements at first visit
ADNI		All		Normal cognition		Mild cognitive impairment		Dementia
Characteristic	Controls n = 192	A+t- n = 368	A+t+ n = 401	A+t- n=107	A+t+ n=49	A+t- n=196	A+t+ n=207	A+t- n=65	A+t+ n=145
Age	72.8 (5.8)	73.7 (7.1) a	74.2 (7.3) a	73.9 (5.8)	77 (5.4) a,c	73.1 (7.3) d	73.5 (7.1) d	75.4 (8.1) a,e	74.2 (8) d
Female, n (%)	94 (49%)	143 (39%) a	196 (49%) b	60 (56%)	26 (53%)	66 (34%) a,c,d	97 (47%) e	17 (26%) a,c,d,f	73 (50%) e,g
Education years	16.6 (2.7)	16.3 (2.7)	15.5 (2.8) a, b	16.2 (2.6)	16.2 (2.5)	16.3 (2.8)	15.8 (2.8) a	16.5 (2.8)	15 (2.9) a,c,d,e,f,g
APOEe4 carrier, n (%)	27 (14%)	206 (56%) a	280 (70%) a, b	48 (45%) a	24 (49%) a	111 (57%) a	150 (72%) a,c,d,e	47 (72%) a,c,d,e	106 (73%) a,c,d,e
MMSE	29 (1.2)	27 (2.5) a	26 (2.9) a, b	29 (1)	29.1 (1.4)	27.6 (1.8) a,c,d	27.2 (1.9) a,c,d,e	23.6 (1.9) a,c,d,e,f	23.1 (2) a,c,d,e,f
Logical memory delayed recall	13.3 (3.2)	7.2 (5) a	4.4 (4.7) a, b	12.6 (3.2)	13.4 (3.4)	6.2 (3.3) a,c,d	4.4 (3.5) a,c,d,e	1.3 (1.8) a,c,d,e,f	1.3 (1.7) a,c,d,e,f
Z score abeta42	0 (1)	-3.6 (1) a	-4 (0.8) a, b	-3.3 (1) a	-3.6 (0.9) a,c	-3.7 (1) a,c	-4 (0.8) a,c,d,e	-4 (0.8) a,c,d,e	-4.2 (0.8) a,c,d,e
Z score t-tau	0 (1)	0.6 (1.2) a	6.1 (3.4) a, b	0 (1.2)	4.6 (1.9) a,c	0.7 (1.2) a,c,d	6.1 (3.4) a,c,d,e	1 (1) a,c,d,f	6.6 (3.5) a,c,d,e,g
Z score p-tau	0 (1)	0.8 (1.7) a	3.1 (2.6) a, b	0.6 (1.6) a	2.9 (2.4) a,c	0.9 (1.8) a,d	3 (2.2) a,c,e	1 (1.5) a,d,f	3.2 (3) a,c,e,g
CSF proteomics available, n (%)	49 (26%)	84 (23%)	120 (29%)	20 (19%)	12 (24%)	43 (22%)	63 (30%)	21 (32%)	45 (31%)
GWAS available, n (%)	102 (53%)	238 (65%)	246 (61%)	63 (59%)	34 (69%)	138 (70%)	145 (70%)	37 (57%)	67 (46%)
Tau pet available, n %)	36 (19%)	39 (11%)	24 (6%)	22 (21%)	8 (16%)	17 (9%)	16 (8%)	0 (0%)	0 (0%)
Repeated CSF available, n (%)	98 (51%)	184 (50%)	217 (54%)	45 (42%)	27 (55%)	110 (56%)	133 (64%)	29 (44%)	57 (39%)
CSF average years repeated	3.0 (1.7)	2.3 (1.4)	2.3 (1.4)	2.8 (1.6)	2.9 (1.7)	2.3 (1.3)	2.4 (1.4)	1.7 (0.9)	1.6 (0.8)
CSF number repeated sampling	2.6 (1.0)	2.4 (0.9)	2.4 (0.8)	2.6 (1.0)	2.5 (1.10	2.4 (0.9)	2.4 (0.8)	2.3 (0.7)	2.2 (0.5)
Repeated cognition available, n (%)	190 (99%)	357 (97%)	384 (96%)	106 (99%)	46 (94%)	191 (97%)	202 (98%)	60 (92%)	136 (94%)
Cognition average years repeated	5.9 (3.1)	4.4 (2.6)	4.0 (4.5)	5.4 (3.0)	5.9 (2.9)	4.4 (2.2)	4.5 (2.3)	1.7 (0.8)	1.7 (0.7)
Cognition number repeated sampling	5.7 (2.6)	5.2 (2.2)	5.0 (2.2)	5.2 (2.4)	5.8 (2.6)	5.8 (2.0)	5.9 (2.1)	3.4 (0.8)	3.4 (0.8)
Repeated MRI available, n (%)	79 (41%)	170 (46%)	217 (54%)	41 (38%)	16 (33%)	79 (40%)	98 (47%)	50 (77%)	103 (71%)
MRI average years repeated	3.3 (1.0)	2.6 (1.2)	2.4 (1.1)	3.1 (1.0)	3.4 (0.9)	2.9 (1.1)	2.9 (1.0)	1.5 (0.6)	1.5 (0.6)
MRI number repeated sampling	5 (1.0)	4.6 (1.4)	4.4 (1.4)	4.8 (0.9)	5.3 (0.9)	5.2 (1.3)	5.2 (1.4)	3.4 (0.9)	3.5 (0.9)
Repeated FDG PET available, n (%)	83 (43%)	167 (45%)	157 (39%)	48 (45%)	20 (41%)	97 (49%)	92 (44%)	19 (29%)	45 (31%)
FDG average years repeated	3.7 (2.0	2.9 (1.7)	3.1 (1.8)	3.3 (1.8)	3.8 (2.3)	3.0 (1.7)	3.4 (1.7)	1.7 (0.5)	1.9 (0.4)
FDG number repeated sampling	3.2 (1.9	3.2 (1.8)	3.4 (1.9)	3.0 (1.7)	3.2 (1.9)	3.4 (1.9)	3.6 (2.2)	3.2 (0.8)	3.1(1.0)
Repeated amyloid PET available, n (%)	99 (52%)	143 (39%)	122 (30%)	51 (48%)	20 (41%)	88 (45%)	85 (41%)	4 (6%)	17 (12%)
Amyloid PET average years repeated	2.4 (0.8)	2.5 (0.8)	2.5 (0.9)	2.2 (0.6)	2.4 (0.8)	2.7 (0.9)	2.6 (0.9)	2.0 (0.0)	2.0 (0.0)
Amyloid PET number repeated sampling	2.1 (0.3)	2.2 (0.4)	2.2 (0.4)	2.1 (0.2)	2.2 (0.4)	2.2 (0.4)	2.2 (0.4)	2 (0.0)	2 (0.0)
EMIF-AD MBD		All		Normal cognition		Mild cognitive impairment		Dementia
Characteristic	Controls n = 188	A+t- n = 224	A+t+ n = 387	A+t- n=91	A+t+ n=33	A+t- n=103	A+t+ n=223	A+t- n=30	A+t+ n=131
Age, mean(sd)	61.6 (7.5)	66 (9.2) a	70.6 (7.6) a,b	61.8 (8.4)	69.7 (6.2) a,c	68.5 (8.3) a,c	71.2 (7.2) a,c,e	69.8 (10.3) a,c	69.7 (8.6) a,c
Female, n (%)	119 (63%)	123 (55%)	216 (56%)	54 (59%)	16 (48%)	51 (50%) a	126 (57%)	18 (60%)	74 (56%)
Education years ''	12.5 (4)	11.6 (3.7) a	10.8 (4) a,b	13 (3.6)	11.1 (3.8) c	10.8 (3.4) a,c	10.9 (4) a,c	9.6 (3.1) a,c	10.6 (4.1) a,c
APOEe4 carrier, n (%) '''	36 (21%)	106 (49%) a	231 (61%) a,b	50 (56%) a	18 (56%) a	35 (36%) a,c	136 (63%) a,c,e	21 (70%) a,e	77 (59%) a,c,e
MMSE''''	28.8 (1.3)	27 (3.3) a	24.7 (4.2) a,b	29 (1)	28.6 (1.4)	26.7 (2.6) a,c,d	25.9 (2.6) a,c,d,e	22 (4.3) a,c,d,e,f	21.5 (4.9) a,c,d,e,f
Memory delayed'''''	-0.3 (1.2)	-0.8 (1.4) a	-1.7 (1.5) a,b	-0.1 (1.2)	0 (1.3)	-1 (1.3) a,c,d	-1.5 (1.4) a,c,d,e	-2 (1.3) a,c,d,e	-2.5 (1.1) a,c,d,e,f
Z score abeta	0 (1)	-1.8 (1) a	-2.6 (0.6) a,b	-1.8 (0.8) a	-2.4 (0.7) a,c	-1.8 (1.2) a,d	-2.6 (0.5) a,c,e	-2.2 (0.7) a,c,e,f	-2.7 (0.6) a,c,e,g
Z score t-tau	0 (1)	0 (1.3)	6.8 (4.8) a,b	-0.3 (1.3)	5.3 (5.7) a,c	0.1 (1.3) d	6.3 (4.1) a,c,e	0.5 (1.1) d,f	8.1 (5.6) a,c,d,e,f,g
Z score p-tau ''''	0 (1)	-0.2 (1.3)	3.2 (2.4) a,b	-0.5 (1.1)	2.6 (2.4) a,c	-0.1 (1.2) d	3.2 (2.2) a,c,e	0.3 (2.1) c,d,f	3.4 (2.7) a,c,d,e,g
CSF proteomics available, n (%)	82 (39%)	77 (38%)	151 (39%)	36 (51%)	21 (70%)	24 (23%)	68 (30%)	17 (57%)	62 (47%)
GWAS available, n (%)	87 (46%)	155 (69%)	294 (76%)	57 (63%)	20 (61%)	74 (72%)	170 (76%)	24 (80%)	104 (79%)
CSF values were standardised according to the mean and standard deviation of the control group (normal cognition, CSF abeta1-42 and total tau)
Data are mean (SD) unless specified otherwise
MMSE=mini-mental state examination; a+t+ = abnormal CSF abeta 1-42 and abnormal total tau; a+t- = abnormal CSF abeta 1-42 and normal total tau
‘ is missing for n=8; '' is missing for n=63; ''' is missing for n=34; '''' is missing for n=5; ''''' is missing for n= 200
a compared to controls with p <.05
b compared to all a+t- with p <.05
c compared to CN a+t- with p <.05
d compared to CN a+t+ with p <.05
e compared to MCI a+t- with p <.05
f compared to MCI a+t+ with p <.05
g compared to Dementia a+t- with p <.05
S1b: Characteristics of individuals with CSF proteomic data
ADNI		All		Normal cognition		Mild cognitive impairment		Dementia
Characteristic	Controls n=49	A+t- n=84	A+t+ n=120	A+t- n=20	A+t+ n=12	A+t- n=43	A+t+ n=63	A+t- n=21	A+t+ n=45
Age	75.4 (5.6)	75.1 (6.8)	74.5 (7.3)	74.8 (5.5)	78.2 (5.2)	75.4 (6.9)	74 (7.5)	74.9 (8.1)	74.3 (7.3)
Female (n, %)	23 (47%)	31 (37%)	51 (44%)	12 (60%)	3 (25%)	13 (30%) c	26 (41%)	6 (29%)	22 (54%)
Education, years	15.5 (2.8)	15.9 (3.2)	15.5 (2.9)	15 (3.6)	16.9 (2.5)	16.3 (3.2)	15.6 (2.9)	15.8 (2.8)	15 (2.9) d,e
APOE e4 carrier (n, %)	5 (10%)	50 (60%) a	81 (70%) a	10 (50%) a	6 (50%) a	24 (56%) a	44 (70%) a	16 (76%) a	31 (76%) a
MMSE	29 (1)	26.5 (2.6) a	25.9 (2.6) a	28.9 (1.1)	29.6 (0.7)	26.9 (1.8) a,c,d	26.7 (1.7) a,c,d	23.2 (1.9) a,c,d,e.f	23.5 (1.8) a,c,d,e.f
Memory delayed	12.2 (3.7)	5.3 (5.1) a	3.2 (4.6) a,b	12.8 (3.2)	14.4 (4.3) a	4 (2.7) a,c,d	2.5 (2.5) a,c,d,e	1 (1.9) a,c,d,e.f	1 (1.6) a,c,d,e.f
Z score Abeta 1-42, pg/ml	0.4 (1.1)	-3.7 (0.9) a	-3.9 (0.8) a	-3.2 (0.8) a	-3.6 (1.3) a	-3.8 (0.9) a,c	-3.9 (0.7) a,c	-3.9 (0.9) a,c	-4 (0.9) a,c
Z score T-tau, pg/ml	0.2 (0.9)	0.9 (1.1)	6 (3.1) a,b	0.7 (1.3)	4 (1.4) a,c	0.9 (1.1) d	6 (3.1) a,c,d,e	1 (1.1) d.f	6.6 (3.3) a,c,d,e,g
Z score P-tau, pg/ml '	-0.5 (0.8)	0.3 (1.2) a	1.9 (1.5) a,b	-0.1 (1.1)	1.5 (1.3) a,c	0.4 (1.3) a,d	1.9 (1.1) a,c,e	0.3 (0.9) a,d.f	2.1 (2) a,c,e,g
EMIF-AD MBD		All		Normal cognition		Mild cognitive impairment		Dementia
Characteristic	Controls n = 82	A+t- n = 77	A+t+ n = 151	A+t- n=36	A+t+ n=21	A+t- n=24	A+t+ n=68	A+t- n=17	A+t+ n=62
Age	61.1 (7.3)	66.1 (8.7) a	69.2 (7.1) a,b	64 (9)	69.8 (6.4) a,c	68.4 (8.5) a,c,d	70.9 (6) a,c	67.1 (7.5) a	67.2 (7.9) a,c,f
Female (n, %)	35 (43%)	32 (42%)	70 (46%)	13 (36%)	11 (52%)	11 (46%)	31 (46%)	8 (47%)	28 (45%)
Education, years	11.9 (3.5)	11.2 (3.3)	11.1 (3.6)	12.7 (3.5)	11.1 (3.5)	10.3 (2.8) a,c	11.4 (3.4)	9.3 (1.8) a,c,f	10.9 (3.9) c
APOE e4 carrier ‘' (n, %)	14 (22%)	44 (63%) a	96 (69%) a	20 (57%) a	12 (63%) a	8 (44%)	44 (73%) a,e	16 (94%) a,c,e	40 (66%) a,g
MMSE '	28.6 (1.3)	26.9 (3.5) a	24.9 (3.9) a,b	28.9 (1)	28.5 (1.4)	27.2 (2.4) a,c	26.2 (2.7) a,c,d	22.5 (4.3) a,c,d,e,f	22.1 (3.9) a,c,d,e,f
Memory delayed ‘’'	0.3 (1.1)	-0.6 (1.5) a	-1.5 (1.5) a,b	0.3 (1)	0.5 (1)	-1 (1.2) a,c,d	-1.3 (1.2) a,c,d	-2.1 (1.3) a,c,d,e,f	-2.4 (1) a,c,d,e,f
Z score Abeta 1-42, pg/ml	0 (1)	-2 (2.3) a	-3.2 (0.6) a,b	-2.2 (1.1) a	-3.1 (0.9) a,c	-1.3 (3.8) a,c,d	-3.3 (0.5) a,c,e	-2.4 (0.9) a,e,f	-3.2 (0.7) a,c,e,g
Z score T-tau, pg/ml	0 (1)	0 (1.4)	6.7 (4.2) a,b	-0.2 (1.5)	5.4 (4.9) a,c	-0.2 (1.4) d	6 (2.9) a,c,e	0.7 (1.2) d,f	7.8 (4.8) a,c,d,e,f,g
Z score P-tau, pg/ml	0 (1)	-0.1 (1.2)	3.2 (2.2) a,b	-0.3 (1.2)	2.7 (2.5) a,c	0 (1.2) d	3.2 (1.8) a,c,e	0.1 (1.1) d,f	3.5 (2.4) a,c,e,g
CSF values were standardised according to the mean and standard deviation of the control group (normal cognition, CSF abeta1-42 and total tau)
Data are mean (SD) unless specified otherwise
MMSE=mini-mental state examination; a+t+ = abnormal CSF abeta 1-42 and abnormal total tau; a+t-= abnormal CSF abeta 1-42 and normal total tau
‘ is missing for n =5; ‘' is missing for n =1; ‘’' is missing for n=49.
a compared to controls with p <.05,
b compared to all a+t- with p <.05,
c compared to CN a+t- with p <.05,
d compared to CN a+t+ with p <.05,
e compared to MCI a+t- with p <.05,
f compared to MCI a+t+ with p <.05,
g compared to Dementia a+t- with p <.05.

## Sheet: Data_S2_Protein_ statistics
Data S2. Protein annotation and statistics of group comparisons of protein levels. a+t+= AD with increased total tau; a+t-= AD with normal total tau																										Stage specific concentrations in AD individuals with normal t-tau (a+t-). Values are z-score relative to control group						Difference between clinical stages in AD with normal t-tau (a+t-)									Stage specific concentrations in AD individuals with increased t-tau (a+t+). Values are z-score relative to control group						Difference between clinical stages in AD with increased t-tau (a+t+)
									Summary CSF group differences			Summary change with disease severity		Group average uncorrected mean (SD)			Group average corrected mean (SE)			Group differences						AD stage uncorrected mean (SD)			AD stage corrected mean (SE)									Analysis linear trend across stages AD with normal t-tau			AD stage uncorrected mean (SD)			AD stage corrected mean (SE) a+t+
Rank	Gene/peptide	Gene	Uniprot	Number of observations	Cohort	Assay	Composite (ADNI only)	EMIF AD MBD and ADNI (1=EMIF AD MBD; 2=ADNI)	AD with normal t-tau vs Control (-1= concentration decreased; 1=concentration increased; 0=no difference)	AD with increased t-tau vs Control (-1= concentration decreased; 1=concentration increased; 0=no difference)	AD normal t-tau (a+t-) vs AD increased t-tau (a+t+) (1= concentration a+t+>a+t-; 2=concentration a+t+<a+t-; 0= no difference	AD with normal t-tau (a+t-)	AD with increased t-tau (a+t+)	Control	AD with normal t-tau (a+t-)	AD with increased t-tau (a+t+)	Control	AD with normal t-tau (a+t-)	AD with increased t-tau (a+t+)	Difference control vs AD with normal t-tau	p-value red: concentration AD normal t-tau>control; green: concentration AD normal t-tau<control	Difference control vs AD with increased t-tau	p-value red: concentration AD increased t-tau>control; green: concentration AD increased t-tau<control	Difference AD normal t-tau vs AD increased t-tau	p-value; red: concentration AD increased t-tau > AD normal t-tau; green: concentration AD increased t-tau < AD normal t-tau;	Preclinical a+t-	Prodromal a+t-	Dementia a+t-	Preclinical a+t-	Prodromal a+t-	Dementia a+t-	Difference preclinical vs prodromal AD a+t-	p-value; red: concentration preclinical<prodromal a+t-; green: concentration preclinical>prodromal a+t-	Difference preclinical vs dementia AD a+t-	p-value; red: concentration preclinical<dementia a+t-; green: concentration preclinical>dementia a+t-	Difference prodromal vs dementia AD a+t-	p-value; red: concentration prodromal<dementia a+t-; green: concentration prodromal>dementia a+t-	beta(se) linear trend across stages	p-value linear trend across stages	Change across stages (non-linear: difference between preclinical and dementia AD or prodromal and dementia AD consistent with increase or decrease over stages)	Preclinical a+t+	Prodromal a+t+	Dementia a+t+	Preclinical a+t+	Prodromal a+t+	Dementia a+t+	Difference a+t+ preclinical vs prodromal AD	p-value; red: concentration preclinical<prodromal a+t+; green: concentration preclinical>prodromal a+t+	Difference preclinical vs dementia a+t+
1	A1BG	A1BG	P04217	249	ADNI	MRM	1	2	0	0	0			0 (0.99)	-0.18 (1.06)	-0.09 (0.85)	-0.02 (0.13)	-0.22 (0.1)	-0.1 (0.09)	0.2	0.22569	0.08	0.62908	-0.13	0.34303	-0.37 (0.94)	-0.23 (1.07)	0.08 (1.12)	-0.35 (0.2)	-0.29 (0.14)	0.03 (0.2)	-0.06	0.82514	-0.38	0.19272	-0.32	0.18736	0.22	0.1895		0.31 (0.59)	-0.11 (0.81)	-0.18 (0.96)	0.15 (0.27)	-0.11 (0.12)	-0.15 (0.14)	0.27	0.36152	0.31
2	A1BG	A1BG	P04217	310	EMIF-AD MBD	MRM	NA	1	0	0	2			0 (1)	0.3 (1.1)	-0.11 (0.96)	-0.02 (0.12)	0.3 (0.12)	-0.1 (0.09)	-0.31	0.06022	0.08	0.57751	0.39	0.00625	0.11 (0.88)	0.41 (1.08)	0.52 (1.5)	0.07 (0.17)	0.42 (0.21)	0.52 (0.24)	-0.35	0.19735	-0.45	0.13472	-0.1	0.75463	0.23	0.1577		-0.46 (1.28)	-0.1 (0.78)	0 (1)	-0.44 (0.22)	-0.08 (0.12)	-0.01 (0.13)	-0.36	0.15635	-0.43
3	A2M	A2M	P01023	270	ADNI	MRM	NA	2	0	0	1			0 (1)	-0.21 (1.27)	0.23 (1.18)	-0.03 (0.15)	-0.28 (0.12)	0.21 (0.1)	0.25	0.20162	-0.24	0.18914	-0.49	0.00162	-0.31 (1.12)	-0.2 (1.37)	-0.13 (1.24)	-0.27 (0.25)	-0.33 (0.17)	-0.23 (0.24)	0.06	0.85077	-0.04	0.91501	-0.09	0.74769	0	0.9827		0.43 (0.7)	0.3 (1.14)	0.04 (1.34)	0.15 (0.34)	0.29 (0.14)	0.08 (0.18)	-0.14	0.69658	0.07
4	A2M	A2M	P01023	310	EMIF-AD MBD	MRM	NA	1	0	0	0	Decrease		0 (1)	0.04 (0.93)	0.22 (0.79)	0.1 (0.1)	0.04 (0.1)	0.16 (0.07)	0.07	0.63973	-0.06	0.63506	-0.13	0.29939	0.22 (1.14)	0.03 (0.7)	-0.31 (0.61)	0.29 (0.14)	0.02 (0.17)	-0.27 (0.2)	0.27	0.21675	0.56	0.01969	0.3	0.25162	-0.28	0.0305	Decrease linear	0.35 (0.84)	0.27 (0.69)	0.12 (0.88)	0.33 (0.18)	0.2 (0.1)	0.14 (0.1)	0.13	0.53405	0.19
6	A4GALT	A4GALT	Q9NPC4	161	EMIF-AD MBD	MRM	NA		0	0	0			0 (1)	0.03 (0.99)	0.04 (0.84)	0.03 (0.17)	0.05 (0.14)	0.02 (0.1)	-0.03	0.90363	0.01	0.97557	0.03	0.85048	-0.16 (1.06)	0.27 (0.88)	0.07 (1.05)	-0.14 (0.2)	0.28 (0.23)	0.13 (0.34)	-0.42	0.16906	-0.27	0.49907	0.15	0.70939	0.17	0.4329		0.07 (0.84)	0.11 (0.83)	-0.03 (0.86)	0.02 (0.27)	0.11 (0.15)	-0.04 (0.15)	-0.08	0.78573	0.07
9	A8MTW9	A8MTW9	A8MTW9	116	EMIF-AD MBD	MRM	NA		0	1	0			0 (1)	0.03 (1.17)	0.44 (0.88)	-0.02 (0.17)	0.08 (0.2)	0.43 (0.13)	-0.1	0.69933	-0.46	0.04731	-0.36	0.1472	-0.04 (1.5)	0.04 (0.81)	0.16 (1.14)	-0.02 (0.32)	0.02 (0.34)	0.11 (0.43)	-0.04	0.93339	-0.14	0.80035	-0.1	0.86097	0.04	0.9028		0.65 (1.05)	0.17 (0.72)	0.6 (0.92)	0.68 (0.29)	0.2 (0.21)	0.56 (0.2)	0.48	0.18203	0.12
10	ABCA2	ABCA2	Q9BZC7	303	EMIF-AD MBD	MRM	NA		0	0	1			0 (1)	-0.28 (0.9)	0.16 (0.85)	-0.02 (0.1)	-0.29 (0.1)	0.18 (0.08)	0.27	0.06609	-0.2	0.137	-0.47	0.00026	-0.17 (0.82)		-0.57 (0.99)	-0.24 (0.15)	-0.24 (0.18)	-0.57 (0.21)	-0.01	0.97208	0.33	0.19079	0.34	0.21533	-0.14	0.2741		0.23 (1.01)	0.14 (0.8)	0.15 (0.86)	0.27 (0.19)	0.17 (0.11)	0.14 (0.11)	0.1	0.6499	0.14
11	ABCB9	ABCB9	Q9NP78	257	EMIF-AD MBD	MRM	NA		0	0	0			0 (1)	0.04 (0.88)	-0.06 (0.88)	0.02 (0.11)	0.06 (0.11)	-0.08 (0.09)	-0.04	0.81851	0.1	0.50429	0.13	0.34399	-0.21 (0.72)	0.26 (1.09)	0.25 (0.77)	-0.18 (0.16)	0.28 (0.19)	0.25 (0.22)	-0.45	0.07508	-0.43	0.1226	0.03	0.92995	0.2	0.1202		-0.17 (1.06)	-0.04 (0.76)	-0.03 (0.94)	-0.22 (0.21)	-0.05 (0.12)	-0.02 (0.12)	-0.16	0.49017	-0.19
12	ABHD14A	ABHD14A	Q9BUJ0	294	EMIF-AD MBD	MRM	NA		-1	0	1			0 (1)	-0.38 (1)	0 (0.92)	-0.01 (0.12)	-0.38 (0.11)	0.01 (0.08)	0.37	0.02454	-0.02	0.8969	-0.39	0.00603	-0.31 (0.98)	-0.43 (1.02)	-0.43 (1.07)	-0.34 (0.17)	-0.43 (0.2)	-0.44 (0.24)	0.09	0.72081	0.1	0.72534	0.01	0.97329	-0.05	0.7248		-0.24 (0.77)	0.07 (0.96)	0 (0.93)	-0.23 (0.22)	0.08 (0.12)	0 (0.13)	-0.31	0.20873	-0.23
14	ABI3BP	ABI3BP	Q7Z7G0	285	EMIF-AD MBD	MRM	NA		0	0	0		Increase	0 (1)	-0.01 (0.7)	-0.15 (0.93)	-0.03 (0.11)	-0.01 (0.11)	-0.14 (0.08)	-0.02	0.87237	0.1	0.48012	0.13	0.34432	0.01 (0.45)	0.05 (0.72)	-0.13 (1.07)	0 (0.15)	0.05 (0.18)	-0.13 (0.21)	-0.05	0.84532	0.13	0.60509	0.18	0.51998	-0.06	0.5616		-0.61 (1.16)	-0.14 (1.04)	-0.02 (0.63)	-0.61 (0.2)	-0.13 (0.11)	-0.02 (0.11)	-0.48	0.03227	-0.59
15	ACACA	ACACA	Q13085	155	EMIF-AD MBD	MRM	NA		0	0	0	Increase		0 (1)	0.01 (1.16)	0.07 (1.25)	0.07 (0.19)	-0.01 (0.18)	0.05 (0.14)	0.08	0.75702	0.02	0.9229	-0.06	0.80055	-0.32 (1.08)	-0.02 (1.06)	0.62 (1.25)	-0.37 (0.29)	-0.01 (0.35)	0.63 (0.37)	-0.36	0.43617	-1	0.03701	-0.64	0.21464	0.4	0.0875	Increase non-linear	-0.17 (0.9)	0.02 (1.23)	0.19 (1.38)	-0.18 (0.35)	0.03 (0.26)	0.2 (0.21)	-0.22	0.61839	-0.39
16	ACAN	ACAN	P16112	169	EMIF-AD MBD	MRM	NA		0	0	0			0 (1)	-0.24 (1.31)	0.08 (0.96)	0.18 (0.18)	-0.19 (0.16)	-0.03 (0.12)	0.37	0.10962	0.2	0.35512	-0.17	0.39927	-0.38 (1.36)	-0.2 (1.54)	0.08 (0.69)	-0.19 (0.24)	-0.14 (0.29)	0.1 (0.38)	-0.04	0.90991	-0.29	0.51773	-0.25	0.60497	0.1	0.6927		0.01 (0.59)	0.05 (1.01)	0.14 (1.04)	-0.08 (0.3)	-0.07 (0.18)	0.15 (0.18)	-0.01	0.98317	-0.23
17	ACE	ACE	P12821	270	ADNI	RBM	0	2	-1	1	1		Decrease	0 (1)	-0.48 (0.9)	0.38 (0.88)	-0.02 (0.12)	-0.49 (0.09)	0.38 (0.08)	0.47	0.00256	-0.4	0.0064	-0.87	0	-0.34 (0.82)	-0.42 (0.89)	-0.73 (0.99)	-0.34 (0.18)	-0.44 (0.12)	-0.74 (0.18)	0.11	0.62744	0.4	0.12164	0.29	0.1766	-0.2	0.1308		0.73 (0.88)	0.46 (0.85)	0.14 (0.9)	0.6 (0.25)	0.48 (0.1)	0.15 (0.13)	0.11	0.66874	0.44
18	ACE	ACE	P12821	227	EMIF-AD MBD	MRM	NA	1	0	0	0			0 (1)	-0.18 (0.87)	0.03 (0.98)	-0.09 (0.13)	-0.18 (0.12)	0.07 (0.09)	0.1	0.58647	-0.16	0.35799	-0.26	0.10001	-0.12 (0.82)	-0.26 (1.01)	-0.23 (0.85)	-0.17 (0.18)	-0.23 (0.24)	-0.26 (0.26)	0.05	0.85591	0.08	0.79086	0.03	0.93367	-0.03	0.861		-0.1 (0.58)	0.18 (0.75)	-0.12 (1.29)	-0.07 (0.24)	0.21 (0.13)	-0.13 (0.15)	-0.28	0.30391	0.06
19	ACHE	ACHE	P22303	290	EMIF-AD MBD	MRM	NA		0	0	0			0 (1)	0.01 (1.05)	0.26 (1.04)	-0.02 (0.13)	0.01 (0.12)	0.28 (0.09)	-0.03	0.86422	-0.3	0.06372	-0.27	0.07512	-0.07 (1.05)	0.03 (1.05)	0.14 (1.13)	-0.12 (0.19)	0.04 (0.22)	0.14 (0.26)	-0.16	0.59262	-0.25	0.43052	-0.09	0.77833	0.09	0.5606		0.19 (0.95)	0.37 (1.1)	0.17 (1.02)	0.22 (0.24)	0.39 (0.14)	0.16 (0.14)	-0.17	0.53771	0.06
23	ACPP	ACPP	P15309	270	ADNI	RBM	0		0	0	1			0 (1)	-0.17 (0.72)	0.05 (0.74)	-0.01 (0.11)	-0.19 (0.08)	0.05 (0.07)	0.18	0.1892	-0.06	0.65432	-0.24	0.02931	-0.07 (0.74)	-0.2 (0.74)	-0.21 (0.66)	-0.07 (0.16)	-0.2 (0.11)	-0.21 (0.15)	0.13	0.48668	0.14	0.53519	0	0.98154	-0.08	0.4818		0.02 (0.7)	0.09 (0.74)	-0.01 (0.76)	-0.04 (0.21)	0.11 (0.09)	0 (0.11)	-0.14	0.53342	-0.03
24	ACTA1	ACTA1	P68133	244	EMIF-AD MBD	MRM	NA		0	0	0			0 (1)	-0.05 (0.69)	0.1 (1.06)	0.07 (0.13)	-0.05 (0.13)	0.06 (0.09)	0.12	0.51556	0.02	0.92204	-0.1	0.5201	0.09 (0.56)	-0.21 (0.88)	-0.11 (0.58)	0.17 (0.19)	-0.23 (0.22)	-0.03 (0.3)	0.4	0.17476	0.2	0.57506	-0.2	0.59852	-0.17	0.1697		-0.16 (1.08)	0.18 (1.08)	0.11 (1.04)	-0.2 (0.23)	0.12 (0.13)	0.13 (0.13)	-0.32	0.22841	-0.33
26	ACTB	ACTB	P60709	310	EMIF-AD MBD	MRM	NA		0	0	0			0 (1)	-0.04 (0.46)	0.13 (0.85)	0.09 (0.1)	-0.04 (0.09)	0.08 (0.07)	0.13	0.33921	0.01	0.96074	-0.12	0.2962	-0.05 (0.48)	0 (0.45)	-0.07 (0.46)	0.05 (0.12)	-0.01 (0.15)	-0.04 (0.18)	0.06	0.77336	0.09	0.6729	0.03	0.87948	-0.04	0.5408		-0.15 (0.92)	0.24 (0.84)	0.12 (0.84)	-0.19 (0.16)	0.17 (0.09)	0.14 (0.09)	-0.35	0.05172	-0.33
27	ACTBL2	ACTBL2	Q562R1	310	EMIF-AD MBD	MRM	NA		0	0	0			0 (1)	0.02 (0.45)	0.13 (0.92)	0.08 (0.1)	0.02 (0.1)	0.08 (0.07)	0.06	0.68366	0	0.97739	-0.06	0.61884	0.02 (0.43)	0 (0.55)	0.04 (0.34)	0.12 (0.13)	-0.01 (0.16)	0.07 (0.19)	0.13	0.5241	0.05	0.82857	-0.08	0.73852	-0.02	0.7335		-0.16 (0.92)	0.22 (0.89)	0.12 (0.96)	-0.2 (0.17)	0.16 (0.1)	0.14 (0.1)	-0.36	0.06917	-0.34
29	ACTG1	ACTG1	P63261	310	EMIF-AD MBD	MRM	NA		0	0	0			0 (1)	-0.04 (0.46)	0.13 (0.85)	0.09 (0.1)	-0.04 (0.09)	0.08 (0.07)	0.13	0.33921	0.01	0.96074	-0.12	0.2962	-0.05 (0.48)	0 (0.45)	-0.07 (0.46)	0.05 (0.12)	-0.01 (0.15)	-0.04 (0.18)	0.06	0.77336	0.09	0.6729	0.03	0.87948	-0.04	0.5408		-0.15 (0.92)	0.24 (0.84)	0.12 (0.84)	-0.19 (0.16)	0.17 (0.09)	0.14 (0.09)	-0.35	0.05172	-0.33
35	ACVR1B	ACVR1B	P36896	123	EMIF-AD MBD	MRM	NA		0	0	0			0 (1)	-0.26 (0.77)	-0.09 (0.88)	-0.03 (0.18)	-0.26 (0.17)	-0.07 (0.12)	0.23	0.34363	0.04	0.85302	-0.19	0.37263	-0.42 (0.72)	-0.14 (0.74)	-0.01 (1.09)	-0.46 (0.24)	-0.14 (0.27)	-0.08 (0.44)	-0.32	0.3826	-0.38	0.44429	-0.06	0.90838	0.21	0.3267		-0.43 (0.8)	0 (0.91)	-0.02 (0.85)	-0.44 (0.25)	0.02 (0.15)	-0.03 (0.2)	-0.46	0.11701	-0.41
37	ACYP1	ACYP1	P07311	185	EMIF-AD MBD	MRM	NA		0	0	1	Decrease		0 (1)	-0.23 (0.72)	0.31 (0.98)	-0.03 (0.15)	-0.23 (0.13)	0.33 (0.1)	0.2	0.32415	-0.36	0.06178	-0.56	0.0009	0.09 (0.59)	-0.37 (0.56)	-0.58 (0.97)	0.09 (0.21)	-0.36 (0.21)	-0.59 (0.27)	0.46	0.13294	0.68	0.04809	0.23	0.51237	-0.38	0.0058	Decrease linear	0.01 (1.03)	0.32 (1.1)	0.4 (0.77)	0.01 (0.26)	0.31 (0.13)	0.41 (0.15)	-0.3	0.30289	-0.4
38	ACYP2	ACYP2	P14621	191	EMIF-AD MBD	MRM	NA		0	0	1	Decrease		0 (1)	-0.32 (1.03)	0.29 (0.97)	-0.01 (0.15)	-0.31 (0.14)	0.29 (0.1)	0.3	0.15801	-0.31	0.11322	-0.6	0.00084	0.12 (0.72)	-0.47 (0.82)	-0.76 (1.46)	0.09 (0.24)	-0.48 (0.23)	-0.75 (0.29)	0.56	0.09009	0.83	0.02696	0.27	0.4681	-0.43	0.0329	Decrease linear	0.43 (0.75)	0.44 (0.89)	0.02 (1.11)	0.51 (0.27)	0.42 (0.14)	0.04 (0.16)	0.09	0.77272	0.47
40	ADA2	ADA2	Q9NZK5	310	EMIF-AD MBD	MRM	NA		0	0	0			0 (1)	0.04 (1.12)	0.2 (0.96)	0.04 (0.12)	0.03 (0.11)	0.18 (0.08)	0.01	0.95763	-0.15	0.33497	-0.15	0.28051	-0.02 (1.11)	0.2 (1.17)	-0.07 (1.08)	-0.01 (0.17)	0.2 (0.21)	-0.06 (0.25)	-0.2	0.45069	0.05	0.8649	0.26	0.42801	-0.03	0.8604		0.21 (0.91)	0.26 (1.04)	0.14 (0.89)	0.22 (0.22)	0.24 (0.13)	0.15 (0.13)	-0.02	0.94809	0.07
41	ADAM10	ADAM10	O14672	310	EMIF-AD MBD	MRM	NA		0	0	0			0 (1)	0.01 (1.01)	0.07 (0.89)	-0.07 (0.11)	0 (0.11)	0.12 (0.08)	-0.07	0.64162	-0.18	0.19703	-0.11	0.4066	-0.02 (0.97)	0.05 (0.94)	0.01 (1.24)	-0.11 (0.16)	0.06 (0.19)	0 (0.23)	-0.17	0.49489	-0.11	0.69842	0.06	0.83154	0.03	0.8361		-0.02 (1.07)	0.05 (0.87)	0.13 (0.86)	0.02 (0.2)	0.11 (0.12)	0.11 (0.12)	-0.09	0.70851	-0.09
42	ADAM11	ADAM11	O75078	310	EMIF-AD MBD	MRM	NA		-1	0	1	Decrease		0 (1)	-0.4 (0.87)	0.12 (0.72)	-0.07 (0.1)	-0.41 (0.09)	0.17 (0.07)	0.34	0.01267	-0.24	0.05532	-0.58	0	-0.18 (0.85)	-0.49 (0.78)	-0.73 (0.96)	-0.27 (0.13)	-0.49 (0.15)	-0.75 (0.18)	0.22	0.28092	0.48	0.03311	0.26	0.27653	-0.26	0.0419	Decrease linear	0.21 (0.82)	0.16 (0.7)	0.06 (0.72)	0.25 (0.17)	0.21 (0.09)	0.04 (0.1)	0.04	0.82121	0.21
43	ADAM15	ADAM15	Q13444	298	EMIF-AD MBD	MRM	NA		0	0	1			0 (1)	-0.2 (0.9)	0.11 (0.72)	0.03 (0.1)	-0.2 (0.1)	0.09 (0.07)	0.23	0.10869	-0.06	0.63933	-0.29	0.02017	-0.18 (0.93)	-0.11 (0.99)	-0.35 (0.72)	-0.15 (0.14)	-0.11 (0.16)	-0.34 (0.19)	-0.03	0.87924	0.2	0.40631	0.23	0.36599	-0.12	0.3396		-0.12 (0.84)	0.14 (0.7)	0.14 (0.71)	-0.13 (0.18)	0.12 (0.1)	0.15 (0.1)	-0.25	0.21928	-0.28
45	ADAM22	ADAM22	Q9P0K1	310	EMIF-AD MBD	MRM	NA		-1	1	1	Decrease		0 (1)	-0.39 (0.95)	0.25 (0.72)	-0.06 (0.1)	-0.4 (0.1)	0.29 (0.07)	0.34	0.01362	-0.34	0.00749	-0.69	0	-0.16 (0.83)	-0.47 (0.93)	-0.77 (1.11)	-0.23 (0.13)	-0.46 (0.16)	-0.78 (0.19)	0.23	0.27369	0.55	0.01998	0.32	0.20786	-0.28	0.0387	Decrease linear	0.34 (0.82)	0.28 (0.69)	0.18 (0.73)	0.38 (0.17)	0.32 (0.1)	0.17 (0.1)	0.05	0.7921	0.21
46	ADAM23	ADAM23	O75077	305	EMIF-AD MBD	MRM	NA		-1	1	1	Decrease		0 (1)	-0.53 (1.01)	0.37 (0.9)	0 (0.11)	-0.54 (0.11)	0.37 (0.08)	0.54	0.00058	-0.37	0.01037	-0.91	0	-0.21 (0.78)	-0.78 (1.17)	-0.89 (1.06)	-0.23 (0.16)	-0.77 (0.19)	-0.89 (0.23)	0.54	0.03027	0.66	0.01769	0.12	0.68297	-0.36	0.0163	Decrease linear	0.49 (1.09)	0.51 (0.81)	0.18 (0.9)	0.51 (0.2)	0.51 (0.11)	0.18 (0.12)	0	0.99163	0.33
48	ADAM9	ADAM9	Q13443	302	EMIF-AD MBD	MRM	NA		0	0	0			0 (1)	0.15 (1.07)	0.05 (0.8)	-0.05 (0.11)	0.14 (0.11)	0.09 (0.08)	-0.19	0.22286	-0.14	0.32729	0.05	0.71644	0.23 (1.2)	0.22 (1.02)	-0.11 (0.87)	0.14 (0.16)	0.23 (0.18)	-0.12 (0.22)	-0.09	0.71886	0.26	0.34367	0.34	0.22808	-0.13	0.4348		0.14 (1.05)	0.03 (0.65)	0.05 (0.87)	0.18 (0.2)	0.06 (0.11)	0.05 (0.12)	0.11	0.62684	0.13
49	ADAMDEC1	ADAMDEC1	O15204	148	EMIF-AD MBD	MRM	NA		0	-1	0			0 (1)	-0.19 (1)	-0.44 (0.87)	-0.01 (0.15)	-0.19 (0.16)	-0.43 (0.12)	0.18	0.42368	0.43	0.03328	0.25	0.20901	-0.59 (1.03)	0.04 (0.86)	0.04 (1.04)	-0.55 (0.26)	0.07 (0.27)	-0.04 (0.3)	-0.63	0.09472	-0.51	0.20034	0.12	0.77578	0.23	0.3298		-0.7 (0.94)	-0.45 (0.85)	-0.31 (0.87)	-0.67 (0.28)	-0.43 (0.17)	-0.34 (0.19)	-0.25	0.44719	-0.33
50	ADAMTS1	ADAMTS1	Q9UHI8	175	EMIF-AD MBD	MRM	NA		0	0	1			0 (1)	-0.35 (0.78)	0.3 (0.81)	0.03 (0.14)	-0.35 (0.14)	0.28 (0.09)	0.37	0.05581	-0.25	0.15	-0.63	0.00031	-0.29 (0.93)	-0.38 (0.52)	-0.43 (0.83)	-0.26 (0.21)	-0.37 (0.24)	-0.44 (0.29)	0.11	0.72784	0.18	0.62006	0.07	0.8539	-0.09	0.6496		0.39 (0.99)	0.31 (0.82)	0.26 (0.77)	0.38 (0.27)	0.3 (0.12)	0.26 (0.13)	0.09	0.77489	0.12
51	ADAMTS2	ADAMTS2	O95450	277	EMIF-AD MBD	MRM	NA		-1	0	1			0 (1)	-0.41 (1.18)	0.28 (1.02)	0.01 (0.13)	-0.41 (0.13)	0.27 (0.09)	0.42	0.02305	-0.26	0.11685	-0.68	4e-05	-0.36 (1.08)	-0.19 (1.12)	-0.75 (1.43)	-0.39 (0.2)	-0.19 (0.26)	-0.76 (0.27)	-0.2	0.54562	0.37	0.26322	0.57	0.12852	-0.19	0.3141		-0.09 (0.86)	0.4 (0.96)	0.26 (1.11)	-0.08 (0.25)	0.41 (0.14)	0.25 (0.15)	-0.5	0.07801	-0.33
53	ADAMTS4	ADAMTS4	O75173	310	EMIF-AD MBD	MRM	NA		0	1	1			0 (1)	-0.19 (0.88)	0.19 (0.77)	-0.06 (0.1)	-0.2 (0.1)	0.23 (0.07)	0.14	0.31377	-0.29	0.02456	-0.43	0.00045	-0.05 (0.97)	-0.37 (0.78)	-0.25 (0.81)	-0.12 (0.14)	-0.36 (0.16)	-0.26 (0.2)	0.24	0.26777	0.14	0.56874	-0.1	0.68824	-0.11	0.4085		0.17 (0.88)	0.19 (0.75)	0.19 (0.78)	0.21 (0.18)	0.23 (0.1)	0.18 (0.1)	-0.02	0.91545	0.03
54	ADAMTS8	ADAMTS8	Q9UP79	239	EMIF-AD MBD	MRM	NA		0	0	0			0 (1)	-0.1 (0.66)	0.1 (0.94)	0.02 (0.12)	-0.1 (0.12)	0.09 (0.09)	0.12	0.45929	-0.07	0.64218	-0.2	0.17997	0.06 (0.75)	-0.18 (0.6)	-0.29 (0.51)	0.03 (0.17)	-0.19 (0.19)	-0.32 (0.24)	0.22	0.39392	0.35	0.22594	0.14	0.64597	-0.2	0.0862		0.06 (0.88)	0.26 (0.89)	-0.08 (1.01)	0.1 (0.21)	0.28 (0.11)	-0.09 (0.13)	-0.18	0.44435	0.19
55	ADAMTSL2	ADAMTSL2	Q86TH1	150	EMIF-AD MBD	MRM	NA		0	0	1			0 (1)	-0.36 (0.85)	0.15 (0.84)	-0.04 (0.14)	-0.35 (0.14)	0.17 (0.11)	0.3	0.13826	-0.21	0.26566	-0.51	0.00448	-0.41 (0.74)	-0.06 (0.96)	-0.6 (1.02)	-0.45 (0.18)	0.01 (0.26)	-0.62 (0.29)	-0.46	0.15109	0.17	0.62679	0.63	0.11189	-0.01	0.965		0.3 (0.68)	0.06 (0.76)	0.18 (0.96)	0.38 (0.26)	0.1 (0.16)	0.13 (0.14)	0.28	0.3609	0.25
59	ADCYAP1	ADCYAP1	P18509	101	EMIF-AD MBD	MRM	NA		0	0	1			0 (1)	-0.38 (1.33)	0.32 (1.03)	-0.03 (0.21)	-0.38 (0.2)	0.34 (0.19)	0.35	0.23015	-0.37	0.20465	-0.72	0.01041	-0.37 (1.15)	-0.14 (1.5)	-1.09 (1.46)	-0.4 (0.32)	-0.15 (0.33)	-1.05 (0.57)	-0.25	0.58607	0.65	0.32236	0.9	0.17862	-0.14	0.7076		1.19 (0.77)	0.13 (1.09)	0.23 (0.95)	1.18 (0.51)	0.17 (0.3)	0.22 (0.26)	1.01	0.09453	0.96
60	ADGRB1	ADGRB1	O14514	310	EMIF-AD MBD	MRM	NA		-1	1	1	Decrease		0 (1)	-0.45 (0.85)	0.28 (0.84)	-0.02 (0.1)	-0.46 (0.1)	0.29 (0.07)	0.45	0.00192	-0.31	0.01926	-0.76	0	-0.27 (0.67)	-0.45 (0.76)	-0.85 (1.17)	-0.31 (0.14)	-0.45 (0.17)	-0.84 (0.2)	0.14	0.53865	0.53	0.03077	0.4	0.13258	-0.29	0.0215	Decrease linear	0.4 (1.09)	0.36 (0.81)	0.15 (0.76)	0.42 (0.18)	0.37 (0.1)	0.15 (0.11)	0.05	0.81457	0.28
61	ADGRB2	ADGRB2	O60241	310	EMIF-AD MBD	MRM	NA		-1	0	1	Decrease	Decrease	0 (1)	-0.76 (1.02)	0.24 (0.97)	-0.01 (0.11)	-0.77 (0.11)	0.24 (0.08)	0.76	0	-0.25	0.09067	-1.01	0	-0.42 (0.77)	-0.83 (1.06)	-1.38 (1.15)	-0.45 (0.16)	-0.83 (0.19)	-1.38 (0.23)	0.38	0.13818	0.93	0.00107	0.55	0.06714	-0.51	0.0004	Decrease linear	0.56 (0.92)	0.36 (0.86)	-0.01 (1.05)	0.58 (0.21)	0.37 (0.12)	-0.01 (0.12)	0.21	0.38316	0.59
62	ADGRB3	ADGRB3	O60242	276	EMIF-AD MBD	MRM	NA		0	1	1			0 (1)	-0.06 (0.96)	0.2 (0.91)	-0.11 (0.11)	-0.07 (0.11)	0.26 (0.08)	-0.04	0.82058	-0.37	0.01037	-0.33	0.01554	0.1 (0.89)	-0.12 (0.95)	-0.34 (1.12)	-0.01 (0.16)	-0.09 (0.19)	-0.38 (0.23)	0.08	0.73874	0.37	0.18584	0.29	0.33564	-0.19	0.2098		0.38 (1.08)	0.18 (0.9)	0.15 (0.87)	0.47 (0.2)	0.24 (0.12)	0.12 (0.12)	0.22	0.34064	0.34
65	ADGRL1	ADGRL1	O94910	249	ADNI	MRM	0	2	-1	1	1		Decrease	0 (1)	-0.94 (1.37)	0.48 (1.27)	-0.03 (0.17)	-0.97 (0.13)	0.49 (0.11)	0.94	3e-05	-0.52	0.01319	-1.46	0	-0.73 (1.51)	-0.86 (1.32)	-1.29 (1.35)	-0.72 (0.28)	-0.91 (0.19)	-1.33 (0.27)	0.2	0.56251	0.61	0.12128	0.41	0.21311	-0.25	0.2374		1.1 (0.55)	0.7 (1.18)	-0.03 (1.39)	0.91 (0.36)	0.72 (0.16)	-0.01 (0.19)	0.18	0.64379	0.91
66	ADGRL1	ADGRL1	O94910	310	EMIF-AD MBD	MRM	NA	1	-1	1	1			0 (1)	-0.54 (0.82)	0.22 (0.8)	-0.06 (0.1)	-0.55 (0.1)	0.25 (0.07)	0.49	0.0004	-0.31	0.01478	-0.81	0	-0.34 (0.78)	-0.66 (0.89)	-0.8 (0.75)	-0.41 (0.14)	-0.66 (0.16)	-0.81 (0.19)	0.24	0.25354	0.39	0.09464	0.15	0.54715	-0.22	0.0627		0.35 (1.03)	0.26 (0.72)	0.13 (0.81)	0.4 (0.17)	0.3 (0.1)	0.11 (0.1)	0.1	0.61753	0.28
67	ADGRL1_SGETVINTANYHDTSPYR	ADGRL1	O94910	249	ADNI	MRM	0	2	-1	0	1			0 (1)	-0.41 (1.62)	0.16 (0.73)	-0.01 (0.16)	-0.43 (0.13)	0.16 (0.11)	0.42	0.04363	-0.16	0.41338	-0.58	0.00052	-0.63 (2.1)	-0.31 (1.45)	-0.41 (1.47)	-0.63 (0.27)	-0.32 (0.19)	-0.42 (0.26)	-0.31	0.33999	-0.22	0.56759	0.1	0.76019	0.12	0.6586		0.24 (0.3)	0.24 (0.35)	0.01 (1.13)	0.21 (0.35)	0.24 (0.15)	0.02 (0.19)	-0.03	0.94208	0.2
69	ADGRL3	ADGRL3	Q9HAR2	310	EMIF-AD MBD	MRM	NA		-1	1	1		Decrease	0 (1)	-0.42 (0.98)	0.12 (0.77)	-0.1 (0.1)	-0.44 (0.1)	0.18 (0.07)	0.34	0.01662	-0.28	0.03038	-0.62	0	-0.26 (0.97)	-0.5 (0.92)	-0.67 (1.09)	-0.39 (0.14)	-0.49 (0.16)	-0.69 (0.19)	0.09	0.6602	0.3	0.20673	0.21	0.41836	-0.17	0.2431		0.38 (0.94)	0.16 (0.69)	-0.01 (0.77)	0.45 (0.18)	0.23 (0.1)	-0.04 (0.1)	0.21	0.28523	0.49
73	ADIPOQ	ADIPOQ	Q15848	270	ADNI	RBM	0	2	0	0	0	Increase		0 (1)	-0.04 (1)	0.16 (0.97)	-0.02 (0.13)	-0.07 (0.1)	0.15 (0.09)	0.05	0.77305	-0.17	0.27838	-0.22	0.0975	-0.38 (1.1)	-0.02 (0.95)	0.25 (0.94)	-0.36 (0.2)	-0.08 (0.14)	0.2 (0.2)	-0.29	0.24672	-0.57	0.04792	-0.28	0.23966	0.31	0.0422	Increase linear	0.31 (1.07)	0.13 (0.92)	0.16 (1.03)	0.14 (0.28)	0.13 (0.11)	0.19 (0.15)	0.01	0.97944	-0.05
74	ADIPOQ	ADIPOQ	Q15848	121	EMIF-AD MBD	MRM	NA	1	1	0	2			0 (1)	0.84 (1.21)	0.3 (1.2)	0.02 (0.22)	0.86 (0.2)	0.27 (0.16)	-0.84	0.00551	-0.25	0.37508	0.59	0.02528	0.8 (1.29)	0.65 (1.41)	1.18 (0.77)	0.87 (0.35)	0.64 (0.37)	1.19 (0.43)	0.23	0.6535	-0.32	0.56608	-0.55	0.33929	0.12	0.669		-0.31 (1.37)	0.25 (1.23)	0.46 (1.16)	-0.31 (0.55)	0.22 (0.26)	0.46 (0.24)	-0.53	0.38843	-0.76
75	ADIRF	ADIRF	Q15847	176	EMIF-AD MBD	MRM	NA		0	0	1			0 (1)	-0.15 (0.67)	0.24 (0.76)	0.11 (0.13)	-0.14 (0.12)	0.19 (0.08)	0.26	0.15255	-0.08	0.64038	-0.33	0.02421	-0.33 (0.53)	-0.09 (0.93)	0.1 (0.48)	-0.21 (0.16)	-0.13 (0.2)	0.12 (0.21)	-0.08	0.75974	-0.33	0.21341	-0.25	0.3932	0.15	0.2095		-0.02 (0.51)	0.17 (0.81)	0.4 (0.74)	-0.03 (0.21)	0.12 (0.11)	0.42 (0.12)	-0.15	0.52832	-0.45
76	ADM	ADM	P35318	172	EMIF-AD MBD	MRM	NA		-1	0	1			0 (1)	-0.6 (0.97)	0.42 (1.15)	0.19 (0.18)	-0.56 (0.17)	0.33 (0.11)	0.75	0.00246	-0.14	0.52372	-0.89	2e-05	-0.32 (0.9)	-1.1 (1.18)	-0.54 (0.7)	-0.18 (0.26)	-0.98 (0.33)	-0.56 (0.34)	0.8	0.0562	0.38	0.38238	-0.42	0.37486	-0.15	0.4086		0.52 (0.85)	0.42 (0.95)	0.4 (1.47)	0.5 (0.31)	0.35 (0.16)	0.39 (0.18)	0.14	0.68186	0.1
77	AEBP1	AEBP1	Q8IUX7	310	EMIF-AD MBD	MRM	NA		0	0	0			0 (1)	0.03 (0.92)	0.12 (0.84)	-0.08 (0.11)	0.03 (0.1)	0.16 (0.08)	-0.1	0.48572	-0.24	0.08128	-0.13	0.29608	0.09 (1.11)	-0.13 (0.64)	0.12 (0.82)	0.04 (0.15)	-0.13 (0.18)	0.11 (0.21)	0.17	0.46633	-0.07	0.79723	-0.23	0.39439	0.02	0.9054		-0.14 (0.65)	0.12 (0.76)	0.2 (0.97)	-0.13 (0.19)	0.15 (0.11)	0.19 (0.11)	-0.28	0.19196	-0.32
78	AFM	AFM	P43652	249	ADNI	MRM	1	2	0	-1	0			0 (0.98)	-0.18 (1.05)	-0.34 (0.91)	-0.02 (0.13)	-0.25 (0.1)	-0.36 (0.09)	0.23	0.18155	0.34	0.03563	0.11	0.40804	-0.32 (0.88)	-0.2 (1.16)	-0.01 (0.98)	-0.28 (0.21)	-0.29 (0.15)	-0.1 (0.21)	0.01	0.96326	-0.18	0.55216	-0.19	0.45168	0.12	0.4966		-0.11 (0.78)	-0.42 (0.86)	-0.28 (1.03)	-0.29 (0.28)	-0.43 (0.12)	-0.26 (0.15)	0.14	0.63462	-0.03
79	AFM	AFM	P43652	310	EMIF-AD MBD	MRM	NA	1	0	0	2	Increase		0 (1)	0.21 (0.87)	-0.3 (0.95)	-0.04 (0.11)	0.21 (0.11)	-0.28 (0.08)	-0.25	0.09628	0.24	0.08688	0.5	0.00023	-0.07 (0.9)	0.42 (0.75)	0.49 (0.84)	-0.09 (0.16)	0.42 (0.19)	0.48 (0.22)	-0.51	0.03947	-0.57	0.03721	-0.06	0.83139	0.28	0.025	Increase linear	-0.46 (1.32)	-0.39 (0.84)	-0.16 (0.92)	-0.46 (0.2)	-0.36 (0.11)	-0.17 (0.12)	-0.1	0.67745	-0.29
80	AGA	AGA	P20933	303	EMIF-AD MBD	MRM	NA		0	1	1			0 (1)	-0.02 (0.89)	0.23 (0.79)	-0.03 (0.1)	-0.03 (0.1)	0.25 (0.07)	0	0.97291	-0.28	0.03428	-0.28	0.02687	-0.02 (0.88)	-0.01 (0.83)	-0.05 (1.07)	-0.08 (0.14)	-0.01 (0.17)	-0.05 (0.21)	-0.06	0.76964	-0.02	0.92477	0.04	0.87804	0.04	0.7758		0.25 (1.04)	0.24 (0.66)	0.21 (0.85)	0.28 (0.19)	0.27 (0.1)	0.2 (0.11)	0.01	0.97226	0.08
81	AGRN	AGRN	O00468	310	EMIF-AD MBD	MRM	NA		0	1	1			0 (1)	-0.26 (0.85)	0.28 (0.84)	-0.02 (0.1)	-0.27 (0.1)	0.3 (0.07)	0.25	0.08012	-0.32	0.01505	-0.57	1e-05	-0.08 (0.76)	-0.36 (0.73)	-0.49 (1.11)	-0.14 (0.14)	-0.36 (0.17)	-0.49 (0.2)	0.22	0.31593	0.35	0.15309	0.13	0.62329	-0.18	0.1441		0.37 (0.92)	0.37 (0.81)	0.14 (0.85)	0.41 (0.18)	0.4 (0.1)	0.14 (0.1)	0.01	0.94652	0.27
82	AGRP	AGRP	O00253	270	ADNI	RBM	0		0	0	0			0 (1)	0.12 (1)	0.19 (0.97)	0.01 (0.13)	0.15 (0.1)	0.2 (0.09)	-0.14	0.41312	-0.18	0.25573	-0.04	0.73941	-0.02 (1.01)	0.1 (0.97)	0.27 (1.05)	-0.04 (0.2)	0.17 (0.14)	0.33 (0.2)	-0.21	0.40401	-0.36	0.2096	-0.15	0.52212	0.15	0.3354		-0.08 (1.11)	0.34 (0.86)	0.03 (1.08)	0.07 (0.28)	0.34 (0.12)	0.01 (0.15)	-0.27	0.36743	0.06
83	AGT	AGT	P01019	310	EMIF-AD MBD	MRM	NA		0	1	1			0 (1)	-0.11 (0.94)	0.24 (0.74)	-0.03 (0.1)	-0.12 (0.1)	0.26 (0.07)	0.09	0.53807	-0.29	0.02596	-0.37	0.00232	0.02 (1.11)	-0.25 (0.7)	-0.18 (0.84)	-0.03 (0.14)	-0.25 (0.16)	-0.19 (0.2)	0.21	0.32332	0.15	0.51877	-0.06	0.81869	-0.1	0.4771		0.38 (0.86)	0.2 (0.77)	0.24 (0.67)	0.41 (0.18)	0.22 (0.1)	0.23 (0.1)	0.19	0.35758	0.18
85	AHSG	AHSG	P02765	249	ADNI	MRM	1	2	0	0	0			0 (0.99)	-0.2 (0.88)	-0.13 (0.78)	-0.03 (0.11)	-0.28 (0.09)	-0.15 (0.07)	0.25	0.0837	0.13	0.34821	-0.12	0.2887	-0.32 (0.89)	-0.19 (0.92)	-0.11 (0.81)	-0.27 (0.17)	-0.3 (0.12)	-0.23 (0.17)	0.03	0.88188	-0.04	0.86867	-0.07	0.72697	0.05	0.7023		0.22 (0.8)	-0.2 (0.73)	-0.11 (0.84)	0.05 (0.23)	-0.24 (0.1)	-0.08 (0.12)	0.29	0.24856	0.13
86	AHSG	AHSG	P02765	310	EMIF-AD MBD	MRM	NA	1	0	0	0			0 (1)	0.1 (1.07)	-0.22 (1.09)	-0.1 (0.12)	0.1 (0.12)	-0.17 (0.09)	-0.2	0.22585	0.07	0.6331	0.28	0.05873	-0.07 (1.14)	0.29 (0.76)	0.17 (1.3)	-0.14 (0.18)	0.29 (0.21)	0.13 (0.25)	-0.42	0.12819	-0.27	0.38382	0.16	0.63882	0.15	0.3244		-0.48 (1.27)	-0.21 (0.97)	-0.14 (1.16)	-0.48 (0.23)	-0.14 (0.13)	-0.17 (0.13)	-0.34	0.19197	-0.31
89	AJAP1	AJAP1	Q9UKB5	310	EMIF-AD MBD	MRM	NA		-1	1	1	Decrease	Decrease	0 (1)	-0.47 (0.9)	0.4 (0.84)	-0.02 (0.1)	-0.48 (0.1)	0.42 (0.07)	0.46	0.00151	-0.44	0.00118	-0.9	0	-0.17 (0.7)	-0.54 (0.9)	-1.01 (1.06)	-0.22 (0.14)	-0.54 (0.17)	-1.02 (0.2)	0.32	0.15028	0.8	0.00135	0.48	0.07106	-0.4	0.002	Decrease linear	0.59 (0.97)	0.5 (0.76)	0.24 (0.85)	0.62 (0.18)	0.52 (0.1)	0.23 (0.11)	0.1	0.63527	0.39
92	AKR1A1	AKR1A1	P14550	155	EMIF-AD MBD	MRM	NA		0	0	0			0 (1)	0.08 (0.76)	0.24 (0.86)	-0.01 (0.14)	0.08 (0.15)	0.25 (0.11)	-0.09	0.65483	-0.26	0.17128	-0.17	0.36213	0.12 (0.61)	0.07 (0.98)	0 (0.66)	0.11 (0.22)	0.07 (0.23)	-0.02 (0.35)	0.04	0.90887	0.13	0.75867	0.09	0.83177	-0.05	0.7661		0.05 (1.25)	0.29 (0.67)	0.24 (0.99)	0.05 (0.28)	0.3 (0.14)	0.23 (0.17)	-0.25	0.42212	-0.19
96	ALB	ALB	P02768	310	EMIF-AD MBD	MRM	NA		1	0	2	Increase		0 (1)	0.3 (0.85)	-0.23 (0.98)	-0.06 (0.11)	0.31 (0.11)	-0.21 (0.08)	-0.37	0.01417	0.14	0.2991	0.52	0.00011	0.02 (0.86)	0.41 (0.7)	0.74 (0.84)	0 (0.15)	0.41 (0.18)	0.71 (0.22)	-0.41	0.08833	-0.72	0.0077	-0.31	0.28618	0.37	0.0024	Increase linear	-0.39 (1.27)	-0.25 (0.8)	-0.16 (1.06)	-0.4 (0.2)	-0.22 (0.11)	-0.17 (0.11)	-0.18	0.42621	-0.22
97	ALCAM	ALCAM	Q13740	310	EMIF-AD MBD	MRM	NA		-1	1	1			0 (1)	-0.38 (0.82)	0.35 (0.76)	-0.02 (0.1)	-0.39 (0.09)	0.37 (0.07)	0.37	0.00722	-0.39	0.00167	-0.76	0	-0.19 (0.77)	-0.47 (0.81)	-0.65 (0.91)	-0.24 (0.13)	-0.47 (0.16)	-0.65 (0.19)	0.23	0.2625	0.41	0.06898	0.18	0.4482	-0.21	0.078		0.52 (0.94)	0.39 (0.68)	0.25 (0.77)	0.55 (0.17)	0.41 (0.09)	0.25 (0.1)	0.14	0.4772	0.3
98	ALDH1A1	ALDH1A1	P00352	219	EMIF-AD MBD	MRM	NA		0	0	0			0 (1)	-0.2 (0.66)	-0.03 (0.64)	-0.02 (0.11)	-0.2 (0.11)	-0.02 (0.07)	0.18	0.23937	0	0.99146	-0.18	0.17247	-0.12 (0.63)	-0.15 (0.71)	-0.46 (0.64)	-0.12 (0.13)	-0.15 (0.16)	-0.47 (0.2)	0.03	0.88311	0.34	0.15345	0.31	0.22313	-0.15	0.2071		-0.16 (0.62)	0.16 (0.55)	-0.21 (0.68)	-0.15 (0.16)	0.17 (0.09)	-0.22 (0.09)	-0.32	0.08165	0.06
101	ALDOA	ALDOA	P04075	249	ADNI	MRM	1	2	-1	1	1			0 (0.97)	-0.35 (1.18)	1.34 (0.95)	-0.02 (0.14)	-0.39 (0.11)	1.35 (0.09)	0.36	0.04647	-1.37	0	-1.73	0	-0.39 (1.18)	-0.31 (1.15)	-0.41 (1.29)	-0.36 (0.23)	-0.38 (0.16)	-0.46 (0.23)	0.02	0.94956	0.1	0.75736	0.08	0.76308	-0.03	0.8515		1.48 (0.71)	1.43 (0.87)	1.17 (1.1)	1.31 (0.3)	1.44 (0.13)	1.2 (0.16)	-0.13	0.68979	0.11
102	ALDOA	ALDOA	P04075	310	EMIF-AD MBD	MRM	NA	1	-1	1	1			0 (1)	-0.29 (1.01)	1 (0.81)	0.03 (0.1)	-0.3 (0.1)	0.99 (0.08)	0.33	0.0232	-0.96	0	-1.29	0	-0.16 (0.83)	-0.3 (0.99)	-0.58 (1.33)	-0.17 (0.15)	-0.3 (0.18)	-0.57 (0.21)	0.12	0.60221	0.4	0.12294	0.28	0.3159	-0.21	0.1543		0.96 (0.98)	1.07 (0.64)	0.94 (0.9)	0.98 (0.19)	1.07 (0.11)	0.94 (0.11)	-0.09	0.68451	0.04
103	ALDOB	ALDOB	P05062	175	EMIF-AD MBD	MRM	NA		0	1	1			0 (1)	-0.13 (0.84)	0.58 (0.77)	0.04 (0.13)	-0.16 (0.13)	0.57 (0.1)	0.2	0.28636	-0.54	0.00204	-0.74	1e-05	0.01 (0.66)	-0.13 (1.03)	-0.48 (0.84)	-0.04 (0.18)	-0.13 (0.2)	-0.51 (0.28)	0.1	0.72081	0.47	0.15425	0.38	0.27546	-0.22	0.1935		0.57 (0.63)	0.64 (0.74)	0.51 (0.85)	0.63 (0.24)	0.64 (0.13)	0.53 (0.14)	-0.02	0.95364	0.1
104	ALDOC	ALDOC	P09972	310	EMIF-AD MBD	MRM	NA		-1	1	1			0 (1)	-0.33 (0.92)	0.59 (0.79)	0.01 (0.1)	-0.34 (0.1)	0.59 (0.07)	0.35	0.01476	-0.58	1e-05	-0.92	0	-0.14 (0.74)	-0.44 (0.99)	-0.58 (1.11)	-0.17 (0.14)	-0.43 (0.17)	-0.58 (0.2)	0.26	0.24198	0.41	0.09785	0.15	0.57334	-0.22	0.0998		0.61 (0.84)	0.66 (0.7)	0.5 (0.86)	0.64 (0.18)	0.67 (0.1)	0.5 (0.1)	-0.03	0.87876	0.13
105	AMBP	AMBP	P02760	249	ADNI	MRM	1	2	0	0	0			0 (0.94)	-0.02 (1.07)	-0.02 (0.89)	-0.05 (0.12)	-0.11 (0.09)	-0.04 (0.08)	0.06	0.6985	-0.01	0.95467	-0.07	0.57977	-0.21 (0.79)	-0.05 (1.13)	0.23 (1.17)	-0.16 (0.19)	-0.19 (0.13)	0.1 (0.19)	0.03	0.90961	-0.26	0.32597	-0.29	0.20015	0.16	0.3309		0.2 (0.7)	-0.01 (0.91)	-0.11 (0.93)	-0.11 (0.25)	-0.01 (0.11)	-0.06 (0.13)	-0.1	0.72085	-0.05
106	AMBP	AMBP	P02760	310	EMIF-AD MBD	MRM	NA	1	0	0	2	Increase		0 (1)	0.18 (0.91)	-0.07 (0.83)	0.1 (0.1)	0.2 (0.1)	-0.13 (0.07)	-0.1	0.48122	0.23	0.07922	0.33	0.008	-0.14 (0.8)	0.43 (0.93)	0.49 (0.9)	-0.02 (0.14)	0.42 (0.17)	0.5 (0.2)	-0.44	0.04114	-0.53	0.02907	-0.08	0.74793	0.29	0.0226	Increase linear	-0.14 (1.17)	-0.12 (0.7)	0.01 (0.84)	-0.2 (0.18)	-0.18 (0.1)	0.03 (0.1)	-0.02	0.91757	-0.23
109	AMY1A	AMY1A	P04745	189	EMIF-AD MBD	MRM	NA		0	0	0			0 (1)	0.1 (1.19)	0.02 (1.06)	0.07 (0.16)	0.1 (0.17)	-0.02 (0.11)	-0.03	0.90829	0.09	0.6468	0.12	0.5558	-0.03 (1.2)	0.29 (1.47)	0.18 (0.68)	-0.01 (0.24)	0.29 (0.34)	0.23 (0.43)	-0.29	0.48117	-0.23	0.63366	0.06	0.91228	0.14	0.5752		0.14 (1.37)	-0.02 (1.01)	0.03 (1.03)	0.13 (0.32)	-0.04 (0.16)	0.05 (0.2)	0.17	0.62884	0.08
111	AMY2B	AMY2B	P19961	239	EMIF-AD MBD	MRM	NA		0	0	0			0 (1)	-0.14 (1.27)	-0.03 (1.14)	0.1 (0.16)	-0.14 (0.15)	-0.08 (0.11)	0.24	0.27417	0.18	0.36167	-0.06	0.74471	-0.1 (1.23)	-0.24 (1.49)	-0.06 (1)	-0.06 (0.23)	-0.24 (0.28)	-0.03 (0.4)	0.18	0.61613	-0.03	0.94829	-0.21	0.66485	-0.03	0.9057		0.03 (1.41)	0.08 (1.03)	-0.19 (1.18)	0.02 (0.29)	0.05 (0.16)	-0.17 (0.17)	-0.03	0.92794	0.19
112	ANG	ANG	P03950	310	EMIF-AD MBD	MRM	NA		0	0	0	Increase		0 (1)	0.08 (1.34)	-0.04 (0.91)	-0.04 (0.12)	0.08 (0.12)	-0.02 (0.09)	-0.13	0.45596	-0.02	0.8786	0.1	0.48751	-0.09 (1.36)	-0.15 (1.52)	0.76 (0.68)	-0.15 (0.18)	-0.14 (0.21)	0.73 (0.25)	0	0.99717	-0.88	0.0049	-0.88	0.0087	0.46	0.0149	Increase linear	-0.23 (0.81)	-0.08 (0.93)	0.06 (0.91)	-0.22 (0.23)	-0.03 (0.13)	0.05 (0.13)	-0.19	0.4689	-0.27
115	ANGPTL2	ANGPTL2	Q9UKU9	277	EMIF-AD MBD	MRM	NA		0	0	0	Decrease		0 (1)	-0.15 (1.08)	0.04 (0.86)	-0.12 (0.12)	-0.16 (0.11)	0.11 (0.08)	0.03	0.83967	-0.23	0.12264	-0.26	0.06213	0.13 (1.02)	-0.26 (1.01)	-0.61 (1.17)	0.02 (0.16)	-0.24 (0.2)	-0.62 (0.24)	0.27	0.30513	0.65	0.02506	0.38	0.21973	-0.36	0.0336	Decrease linear	0.19 (0.91)	-0.03 (0.72)	0.07 (1)	0.23 (0.22)	0.04 (0.11)	0.04 (0.13)	0.2	0.41681	0.19
118	ANGPTL7	ANGPTL7	O43827	235	EMIF-AD MBD	MRM	NA		1	0	2			0 (1)	0.61 (1.09)	0.1 (1.02)	-0.15 (0.14)	0.63 (0.14)	0.17 (0.1)	-0.78	8e-05	-0.32	0.06625	0.46	0.00666	0.7 (1.21)	0.43 (0.7)	0.73 (1.35)	0.61 (0.21)	0.45 (0.24)	0.71 (0.3)	0.16	0.61771	-0.09	0.79785	-0.25	0.50843	0.01	0.9403		0.31 (0.78)	0.06 (1.03)	0.09 (1.08)	0.33 (0.28)	0.13 (0.14)	0.05 (0.15)	0.2	0.51229	0.28
121	ANPEP	ANPEP	P15144	265	EMIF-AD MBD	MRM	NA		0	0	2	Increase		0 (1)	0.17 (0.69)	-0.18 (0.85)	-0.01 (0.11)	0.17 (0.1)	-0.18 (0.08)	-0.18	0.24077	0.17	0.24306	0.34	0.0081	-0.03 (0.49)	0.33 (0.66)	0.35 (1.01)	-0.04 (0.15)	0.33 (0.17)	0.35 (0.21)	-0.37	0.10091	-0.39	0.13662	-0.02	0.93869	0.23	0.0384	Increase linear	-0.19 (0.97)	-0.18 (0.83)	-0.18 (0.85)	-0.19 (0.2)	-0.17 (0.1)	-0.18 (0.11)	-0.02	0.9417	-0.01
122	ANTXR1	ANTXR1	Q9H6X2	107	EMIF-AD MBD	MRM	NA		0	0	1			0 (1)	-0.34 (0.79)	0.22 (0.95)	-0.03 (0.2)	-0.35 (0.19)	0.24 (0.13)	0.32	0.24024	-0.27	0.26402	-0.59	0.01182	-0.37 (0.73)	-0.17 (0.8)	-0.6 (1.09)	-0.46 (0.27)	-0.1 (0.33)	-0.78 (0.48)	-0.35	0.42264	0.32	0.54837	0.68	0.26017	-0.03	0.8887		0.15 (0.92)	0.41 (1.07)	0.1 (0.88)	0.18 (0.27)	0.46 (0.21)	0.1 (0.18)	-0.28	0.4183	0.08
123	ANXA1	ANXA1	P04083	107	EMIF-AD MBD	MRM	NA		0	0	0			0 (1)	0.01 (0.47)	-0.26 (0.98)	0.05 (0.18)	0.02 (0.21)	-0.29 (0.13)	0.03	0.89885	0.35	0.1373	0.31	0.20975	0.02 (0.39)	0.07 (0.62)	-0.11 (0.53)	0.14 (0.29)	0.13 (0.37)	-0.2 (0.46)	0.01	0.97707	0.34	0.53421	0.33	0.57567	-0.08	0.5675		-0.5 (0.84)	-0.23 (0.88)	-0.18 (1.21)	-0.52 (0.3)	-0.28 (0.17)	-0.15 (0.21)	-0.24	0.50551	-0.37
124	ANXA2	ANXA2	P07355	170	EMIF-AD MBD	MRM	NA		0	-1	2			0 (1)	0.18 (0.65)	-0.32 (1.09)	0.05 (0.15)	0.19 (0.15)	-0.36 (0.12)	-0.14	0.49198	0.41	0.04194	0.55	0.00399	0.26 (0.77)	0.07 (0.44)	0.13 (0.66)	0.31 (0.21)	0.11 (0.26)	0.13 (0.34)	0.21	0.53409	0.19	0.64402	-0.02	0.96246	-0.09	0.5116		-0.41 (1.2)	-0.2 (1.16)	-0.42 (0.99)	-0.4 (0.28)	-0.25 (0.17)	-0.42 (0.17)	-0.15	0.64073	0.02
128	ANXA5	ANXA5	P08758	303	EMIF-AD MBD	MRM	NA		0	0	0		Increase	0 (1)	-0.03 (0.86)	0.02 (1.01)	0.18 (0.11)	-0.02 (0.11)	-0.08 (0.08)	0.2	0.19356	0.26	0.06749	0.06	0.65078	-0.12 (0.93)	0.17 (0.83)	-0.11 (0.73)	0.02 (0.16)	0.16 (0.19)	-0.08 (0.23)	-0.14	0.56706	0.1	0.71216	0.24	0.41303	-0.05	0.6598		-0.47 (1.1)	0.15 (0.77)	0.04 (1.16)	-0.53 (0.21)	0.05 (0.11)	0.07 (0.12)	-0.58	0.01381	-0.6
131	AP1B1	AP1B1	Q10567	115	EMIF-AD MBD	MRM	NA		0	0	1		Increase	0 (1)	-0.43 (0.95)	0.36 (0.98)	0.04 (0.19)	-0.42 (0.23)	0.34 (0.13)	0.46	0.11435	-0.3	0.20524	-0.76	0.00421	-0.57 (0.74)	-0.11 (1.17)	-0.58 (1.08)	-0.43 (0.36)	-0.13 (0.39)	-0.54 (0.43)	-0.3	0.571	0.11	0.84748	0.41	0.4852	0.09	0.7522		-0.45 (1.04)	0.35 (0.84)	0.61 (1.07)	-0.52 (0.37)	0.32 (0.16)	0.64 (0.2)	-0.84	0.03972	-1.16
134	AP2B1	AP2B1	P63010	270	EMIF-AD MBD	MRM	NA		0	1	1			0 (1)	-0.14 (0.97)	0.72 (0.83)	0.02 (0.12)	-0.14 (0.11)	0.72 (0.08)	0.16	0.31465	-0.7	0	-0.86	0	-0.13 (0.86)	-0.28 (0.89)	0.05 (1.3)	-0.12 (0.16)	-0.28 (0.19)	0.05 (0.24)	0.16	0.53024	-0.17	0.5465	-0.33	0.27975	0.05	0.7294		0.8 (1.05)	0.79 (0.72)	0.63 (0.88)	0.8 (0.21)	0.78 (0.11)	0.63 (0.12)	0.01	0.95325	0.17
135	APCS	APCS	P02743	270	ADNI	RBM	0	2	0	0	0			0 (1)	-0.03 (1)	-0.23 (0.79)	-0.01 (0.11)	-0.17 (0.08)	-0.28 (0.07)	0.15	0.28156	0.26	0.05033	0.11	0.31967	-0.32 (1)	0.06 (1.05)	0.05 (0.87)	-0.24 (0.17)	-0.14 (0.11)	-0.15 (0.16)	-0.1	0.61051	-0.1	0.67756	0.01	0.97701	0.05	0.7363		0.26 (0.61)	-0.28 (0.81)	-0.28 (0.78)	0.01 (0.23)	-0.35 (0.09)	-0.24 (0.12)	0.37	0.138	0.25
136	APCS	APCS	P02743	310	EMIF-AD MBD	MRM	NA	1	0	-1	2			0 (1)	-0.14 (0.92)	-0.4 (0.77)	-0.05 (0.1)	-0.12 (0.09)	-0.38 (0.07)	0.07	0.59994	0.32	0.0086	0.25	0.0292	-0.2 (0.98)	-0.01 (0.92)	-0.17 (0.84)	-0.2 (0.13)	-0.02 (0.16)	-0.2 (0.19)	-0.19	0.36269	0	0.9912	0.18	0.45014	0.02	0.8876		-0.35 (0.9)	-0.45 (0.68)	-0.37 (0.82)	-0.38 (0.17)	-0.42 (0.09)	-0.38 (0.1)	0.04	0.84003	0
137	APLP1	APLP1	P51693	310	EMIF-AD MBD	MRM	NA		-1	1	1	Decrease		0 (1)	-0.52 (0.89)	0.34 (0.74)	-0.02 (0.1)	-0.53 (0.1)	0.35 (0.07)	0.51	0.00023	-0.37	0.00369	-0.88	0	-0.28 (0.77)	-0.6 (0.8)	-0.91 (1.13)	-0.31 (0.13)	-0.6 (0.16)	-0.91 (0.19)	0.29	0.17141	0.6	0.01041	0.31	0.21044	-0.3	0.0207	Decrease linear	0.45 (0.82)	0.4 (0.68)	0.24 (0.77)	0.47 (0.17)	0.41 (0.1)	0.24 (0.1)	0.05	0.78138	0.23
138	APLP2	APLP2	Q06481	249	ADNI	MRM	1	2	-1	1	1		Decrease	0 (0.94)	-0.58 (1.21)	0.79 (1.01)	-0.02 (0.15)	-0.63 (0.11)	0.78 (0.1)	0.61	0.00128	-0.8	1e-05	-1.41	0	-0.47 (1.36)	-0.51 (1.1)	-0.83 (1.31)	-0.44 (0.24)	-0.6 (0.16)	-0.91 (0.23)	0.16	0.57361	0.48	0.15288	0.32	0.26314	-0.21	0.2719		1.28 (0.62)	0.91 (0.9)	0.45 (1.16)	1.1 (0.31)	0.91 (0.13)	0.47 (0.16)	0.19	0.56671	0.63
139	APLP2	APLP2	Q06481	310	EMIF-AD MBD	MRM	NA	1	0	1	1	Decrease		0 (1)	-0.3 (0.93)	0.3 (0.79)	-0.09 (0.1)	-0.31 (0.1)	0.35 (0.07)	0.23	0.10589	-0.43	0.00094	-0.66	0	-0.01 (0.8)	-0.49 (0.88)	-0.65 (1.11)	-0.09 (0.14)	-0.49 (0.17)	-0.67 (0.2)	0.39	0.07468	0.57	0.01893	0.18	0.48508	-0.3	0.0233	Decrease linear	0.37 (0.9)	0.27 (0.74)	0.3 (0.82)	0.41 (0.18)	0.32 (0.1)	0.29 (0.1)	0.09	0.64841	0.12
141	APOA1	APOA1	P02647	270	ADNI	RBM	0	2	0	0	0			0 (1)	-0.1 (0.94)	-0.02 (0.86)	-0.02 (0.12)	-0.15 (0.09)	-0.03 (0.08)	0.13	0.39024	0.02	0.91811	-0.12	0.33866	-0.32 (0.97)	-0.01 (0.93)	-0.08 (0.96)	-0.3 (0.18)	-0.08 (0.13)	-0.14 (0.18)	-0.22	0.33589	-0.16	0.53326	0.05	0.80313	0.1	0.4849		0.57 (0.99)	-0.06 (0.79)	-0.13 (0.88)	0.41 (0.25)	-0.07 (0.1)	-0.1 (0.13)	0.47	0.08191	0.51
142	APOA1	APOA1	P02647	310	EMIF-AD MBD	MRM	NA	1	0	0	2			0 (1)	0.25 (0.85)	-0.22 (0.89)	-0.03 (0.11)	0.25 (0.1)	-0.21 (0.08)	-0.28	0.05908	0.18	0.1828	0.46	0.00039	0.14 (1)	0.21 (0.65)	0.55 (0.72)	0.12 (0.15)	0.21 (0.18)	0.54 (0.21)	-0.09	0.68671	-0.42	0.10805	-0.33	0.2452	0.18	0.1536		-0.28 (1.12)	-0.26 (0.73)	-0.16 (0.98)	-0.27 (0.19)	-0.24 (0.11)	-0.17 (0.11)	-0.04	0.86333	-0.1
143	APOA2	APOA2	P02652	310	EMIF-AD MBD	MRM	NA		0	0	2			0 (1)	0.23 (0.86)	-0.27 (0.89)	-0.05 (0.11)	0.24 (0.1)	-0.24 (0.08)	-0.29	0.05125	0.19	0.1646	0.48	0.00024	0.06 (0.92)	0.34 (0.85)	0.45 (0.74)	0 (0.15)	0.34 (0.18)	0.43 (0.21)	-0.34	0.1486	-0.43	0.10216	-0.09	0.7554	0.2	0.1244		-0.29 (1.09)	-0.25 (0.77)	-0.29 (0.95)	-0.27 (0.19)	-0.2 (0.11)	-0.31 (0.11)	-0.07	0.74979	0.04
144	APOA4	APOA4	P06727	310	EMIF-AD MBD	MRM	NA		0	0	2			0 (1)	0.18 (0.84)	-0.1 (0.84)	0.06 (0.1)	0.19 (0.1)	-0.14 (0.07)	-0.12	0.38144	0.2	0.11747	0.33	0.00813	0.08 (0.83)	0.17 (0.92)	0.39 (0.73)	0.15 (0.14)	0.17 (0.17)	0.39 (0.2)	-0.02	0.93256	-0.24	0.3194	-0.23	0.39107	0.13	0.2832		-0.23 (0.94)	-0.08 (0.78)	-0.08 (0.88)	-0.27 (0.18)	-0.11 (0.1)	-0.07 (0.11)	-0.16	0.44332	-0.2
145	APOB	APOB	P04114	310	EMIF-AD MBD	MRM	NA	1	0	0	0			0 (1)	0.07 (0.93)	0.02 (0.85)	0.03 (0.11)	0.07 (0.1)	0 (0.08)	-0.04	0.80581	0.03	0.82536	0.07	0.60649	0.08 (1.1)	0.15 (0.91)	-0.05 (0.51)	0.11 (0.15)	0.14 (0.18)	-0.04 (0.21)	-0.04	0.87808	0.15	0.57326	0.18	0.51306	-0.08	0.5813		0.12 (0.84)	-0.07 (0.68)	0.09 (1.01)	0.11 (0.19)	-0.1 (0.11)	0.1 (0.11)	0.2	0.35673	0.01
146	APOB_IAELSATAQEIIK	APOB	P04114	249	ADNI	MRM	0	2	1	0	0			0 (1)	0.29 (0.28)	0.16 (0.69)	-0.01 (0.09)	0.27 (0.07)	0.16 (0.06)	-0.28	0.01913	-0.17	0.14502	0.12	0.22226	0.17 (0.26)	0.32 (0.27)	0.34 (0.29)	0.17 (0.12)	0.3 (0.09)	0.32 (0.12)	-0.13	0.40048	-0.15	0.40579	-0.02	0.90397	0.08	0.0604		0.23 (0.89)	0.12 (0.75)	0.2 (0.52)	0.21 (0.16)	0.12 (0.07)	0.2 (0.09)	0.09	0.59411	0.01
147	APOB_SVSLPSLDPASAK	APOB	P04114	249	ADNI	MRM	0	2	0	0	0			0 (1)	0.11 (0.47)	-0.02 (0.97)	-0.01 (0.12)	0.09 (0.09)	-0.03 (0.08)	-0.1	0.50701	0.02	0.90876	0.12	0.33277	-0.08 (0.31)	0.15 (0.5)	0.21 (0.5)	-0.06 (0.18)	0.11 (0.12)	0.16 (0.17)	-0.16	0.45944	-0.22	0.38118	-0.06	0.78123	0.13	0.0772		0.29 (0.42)	-0.08 (1.05)	-0.02 (0.95)	0.21 (0.23)	-0.1 (0.1)	-0.01 (0.12)	0.31	0.22199	0.22
148	APOB_TGISPLALIK	APOB	P04114	249	ADNI	MRM	0	2	0	1	0			0 (1)	0.22 (0.51)	0.28 (0.53)	-0.02 (0.09)	0.18 (0.07)	0.27 (0.06)	-0.2	0.08202	-0.28	0.00824	-0.09	0.33128	0.1 (0.23)	0.22 (0.63)	0.32 (0.41)	0.12 (0.11)	0.17 (0.08)	0.27 (0.11)	-0.05	0.69754	-0.16	0.32044	-0.1	0.4357	0.09	0.2675		0.5 (0.43)	0.25 (0.39)	0.26 (0.7)	0.41 (0.15)	0.24 (0.06)	0.27 (0.08)	0.17	0.27591	0.14
149	APOC1	APOC1	P02654	310	EMIF-AD MBD	MRM	NA		0	0	0			0 (1)	0.01 (1.02)	-0.09 (0.79)	-0.02 (0.11)	0.01 (0.1)	-0.08 (0.08)	-0.03	0.84426	0.06	0.64717	0.09	0.47851	0.23 (1.11)	-0.31 (1.05)	0.01 (0.68)	0.2 (0.15)	-0.31 (0.18)	0 (0.21)	0.51	0.03098	0.19	0.45344	-0.31	0.2618	-0.17	0.2616		0.19 (0.82)	-0.14 (0.73)	-0.12 (0.84)	0.2 (0.19)	-0.13 (0.11)	-0.13 (0.11)	0.33	0.13645	0.33
150	APOC2	APOC2	P02655	310	EMIF-AD MBD	MRM	NA		0	0	0			0 (1)	0.09 (1.01)	-0.1 (0.82)	0 (0.11)	0.09 (0.11)	-0.1 (0.08)	-0.09	0.53232	0.1	0.4583	0.2	0.13418	0.41 (1.05)	-0.27 (1.02)	-0.07 (0.69)	0.4 (0.15)	-0.27 (0.18)	-0.07 (0.21)	0.67	0.00479	0.47	0.07028	-0.2	0.48493	-0.33	0.0273		0.11 (0.81)	-0.14 (0.83)	-0.14 (0.82)	0.12 (0.19)	-0.13 (0.11)	-0.14 (0.11)	0.25	0.25368	0.27
151	APOC3	APOC3	P02656	270	ADNI	RBM	0	2	0	0	0		Decrease	0 (1)	-0.07 (0.86)	0 (0.72)	-0.02 (0.11)	-0.1 (0.08)	0 (0.07)	0.08	0.56197	-0.01	0.93416	-0.09	0.40793	-0.26 (0.78)	0.03 (0.9)	-0.1 (0.85)	-0.25 (0.16)	-0.01 (0.11)	-0.12 (0.16)	-0.25	0.20442	-0.13	0.55311	0.11	0.54658	0.08	0.5343		0.58 (0.91)	-0.04 (0.67)	-0.11 (0.67)	0.46 (0.22)	-0.03 (0.09)	-0.09 (0.12)	0.49	0.03845	0.55
152	APOC3	APOC3	P02656	310	EMIF-AD MBD	MRM	NA	1	0	0	0			0 (1)	0.02 (1.07)	-0.09 (0.83)	0.02 (0.11)	0.02 (0.11)	-0.11 (0.08)	0	0.99513	0.13	0.35584	0.13	0.33292	0.23 (1.05)	-0.22 (0.96)	-0.08 (1.25)	0.24 (0.16)	-0.22 (0.19)	-0.08 (0.22)	0.47	0.05861	0.32	0.23748	-0.14	0.62214	-0.22	0.161		0.04 (0.85)	-0.12 (0.81)	-0.11 (0.85)	0.04 (0.2)	-0.13 (0.11)	-0.11 (0.12)	0.17	0.45365	0.15
154	APOD	APOD	P05090	310	EMIF-AD MBD	MRM	NA	1	1	0	0			0 (1)	0.4 (1.04)	0.26 (0.94)	-0.01 (0.11)	0.41 (0.11)	0.26 (0.08)	-0.42	0.00828	-0.28	0.06005	0.15	0.29163	0.4 (1.13)	0.23 (1.01)	0.63 (0.86)	0.41 (0.17)	0.23 (0.2)	0.62 (0.24)	0.18	0.49273	-0.21	0.47563	-0.38	0.21482	0.09	0.5467		0.25 (1.1)	0.23 (0.89)	0.3 (0.96)	0.23 (0.21)	0.24 (0.12)	0.29 (0.12)	-0.01	0.98161	-0.06
155	APOD_RBM	APOD	P05090	270	ADNI	RBM	0	2	0	0	0	Increase		0 (1)	0.12 (1.05)	0.27 (0.97)	-0.02 (0.12)	0.01 (0.1)	0.24 (0.08)	-0.03	0.8504	-0.26	0.08331	-0.23	0.06639	-0.26 (0.92)	0.11 (1.07)	0.52 (1)	-0.2 (0.19)	-0.06 (0.13)	0.36 (0.19)	-0.14	0.5378	-0.56	0.03903	-0.42	0.06641	0.27	0.0636	Increase non-linear	0.62 (0.84)	0.25 (0.96)	0.2 (1.02)	0.34 (0.26)	0.21 (0.11)	0.25 (0.14)	0.13	0.6583	0.09
156	APOD_VLNQELR	APOD	P05090	249	ADNI	MRM	0	2	1	1	1			0 (1)	0.29 (0.68)	0.51 (0.76)	-0.01 (0.11)	0.29 (0.09)	0.52 (0.07)	-0.29	0.04073	-0.52	0.00013	-0.23	0.04349	0.26 (0.68)	0.38 (0.65)	0.13 (0.75)	0.26 (0.16)	0.38 (0.11)	0.13 (0.16)	-0.12	0.56184	0.13	0.57733	0.25	0.20891	-0.07	0.5366		0.53 (0.52)	0.47 (0.72)	0.58 (0.89)	0.49 (0.21)	0.48 (0.09)	0.58 (0.11)	0.01	0.95019	-0.09
157	APOE	APOE	P02649	249	ADNI	MRM	1	2	-1	1	1			0 (0.81)	-0.48 (1.15)	0.65 (1.15)	-0.03 (0.15)	-0.53 (0.12)	0.64 (0.1)	0.5	0.00998	-0.67	0.00024	-1.17	0	-0.39 (1.19)	-0.4 (1.14)	-0.7 (1.17)	-0.35 (0.25)	-0.51 (0.17)	-0.8 (0.24)	0.16	0.59947	0.46	0.19151	0.3	0.31209	-0.19	0.2969		1.1 (1.08)	0.79 (1.13)	0.31 (1.14)	0.89 (0.32)	0.78 (0.14)	0.34 (0.17)	0.11	0.75075	0.55
158	APOE	APOE	P02649	310	EMIF-AD MBD	MRM	NA	1	-1	0	1	Decrease		0 (1)	-0.48 (0.93)	0.19 (0.74)	-0.02 (0.1)	-0.49 (0.1)	0.2 (0.07)	0.47	0.00093	-0.22	0.09368	-0.69	0	-0.19 (0.87)	-0.71 (0.82)	-0.79 (1.06)	-0.22 (0.14)	-0.71 (0.16)	-0.8 (0.19)	0.48	0.02403	0.58	0.01518	0.09	0.71042	-0.32	0.0192	Decrease linear	0.34 (0.84)	0.24 (0.71)	0.07 (0.73)	0.35 (0.17)	0.26 (0.1)	0.07 (0.1)	0.09	0.65782	0.29
159	APOE_e2	APOE	P02649	249	ADNI	MRM	0		-1	0	0			0 (1)	-0.42 (0.9)	-0.29 (0.83)	0 (0.13)	-0.42 (0.1)	-0.28 (0.08)	0.42	0.01038	0.28	0.06671	-0.14	0.29312	-0.43 (0.88)	-0.3 (0.9)	-0.65 (0.92)	-0.44 (0.19)	-0.31 (0.13)	-0.64 (0.19)	-0.13	0.58187	0.21	0.45155	0.34	0.14507	-0.09	0.5508		-0.24 (0.23)	-0.22 (0.79)	-0.41 (0.99)	-0.26 (0.25)	-0.21 (0.11)	-0.4 (0.14)	-0.06	0.83765	0.14
160	APOE_e4	APOE	P02649	249	ADNI	MRM	0		1	1	1			0 (1)	0.9 (1.04)	1.23 (1.1)	0 (0.15)	0.88 (0.12)	1.22 (0.1)	-0.88	1e-05	-1.22	0	-0.33	0.03092	0.67 (1.21)	0.91 (1.02)	1.09 (0.89)	0.69 (0.24)	0.89 (0.17)	1.07 (0.24)	-0.2	0.49337	-0.38	0.26966	-0.17	0.54469	0.15	0.3607		1.04 (0.87)	1.22 (1.17)	1.29 (1.07)	1.03 (0.32)	1.2 (0.14)	1.3 (0.17)	-0.17	0.6211	-0.27
161	APOF	APOF	Q13790	310	EMIF-AD MBD	MRM	NA		0	0	0			0 (1)	0.24 (0.89)	0 (0.84)	0 (0.11)	0.25 (0.1)	0 (0.08)	-0.25	0.09087	0	0.98416	0.25	0.05004	0.11 (0.88)	0.29 (1.04)	0.47 (0.66)	0.13 (0.15)	0.29 (0.18)	0.46 (0.21)	-0.16	0.47506	-0.34	0.18679	-0.17	0.52714	0.14	0.2671		-0.15 (0.92)	0.01 (0.7)	0.04 (0.96)	-0.17 (0.19)	0 (0.11)	0.04 (0.11)	-0.17	0.43236	-0.21
162	APOH	APOH	P02749	270	ADNI	RBM	0	2	0	0	0			0 (1)	0.05 (1.13)	-0.03 (0.93)	-0.02 (0.13)	-0.06 (0.1)	-0.06 (0.08)	0.04	0.82229	0.03	0.8226	0	0.98886	-0.29 (1)	0.15 (1.17)	0.15 (1.18)	-0.23 (0.2)	-0.02 (0.13)	0 (0.19)	-0.22	0.36257	-0.23	0.39951	-0.02	0.94646	0.12	0.4662		0.45 (0.61)	-0.08 (0.94)	-0.07 (0.95)	0.16 (0.27)	-0.12 (0.11)	-0.02 (0.14)	0.28	0.3398	0.18
163	APOH	APOH	P02749	310	EMIF-AD MBD	MRM	NA	1	0	-1	2			0 (1)	0.15 (0.83)	-0.24 (0.91)	0.04 (0.11)	0.16 (0.1)	-0.27 (0.08)	-0.12	0.4206	0.3	0.02564	0.42	0.0011	-0.1 (0.72)	0.49 (0.8)	0.19 (0.97)	-0.05 (0.15)	0.48 (0.18)	0.2 (0.21)	-0.53	0.02299	-0.25	0.33832	0.28	0.30416	0.17	0.1544		-0.43 (1.41)	-0.25 (0.74)	-0.16 (0.87)	-0.46 (0.19)	-0.28 (0.11)	-0.15 (0.11)	-0.18	0.40724	-0.3
164	APOL1	APOL1	O14791	310	EMIF-AD MBD	MRM	NA		0	0	2			0 (1)	0.07 (0.93)	-0.26 (0.79)	-0.06 (0.1)	0.07 (0.1)	-0.23 (0.07)	-0.14	0.34012	0.16	0.22437	0.3	0.01781	-0.08 (1.09)	0.12 (0.84)	0.33 (0.61)	-0.14 (0.14)	0.12 (0.17)	0.31 (0.2)	-0.26	0.24365	-0.45	0.06703	-0.19	0.464	0.19	0.1664		-0.38 (0.86)	-0.37 (0.65)	-0.1 (0.88)	-0.36 (0.18)	-0.33 (0.1)	-0.12 (0.11)	-0.03	0.88414	-0.24
166	APOM	APOM	O95445	310	EMIF-AD MBD	MRM	NA		1	0	2			0 (1)	0.27 (0.89)	-0.14 (0.91)	-0.07 (0.11)	0.27 (0.11)	-0.11 (0.08)	-0.34	0.02437	0.04	0.77751	0.38	0.00406	0.17 (0.86)	0.2 (1.01)	0.59 (0.74)	0.11 (0.15)	0.21 (0.18)	0.58 (0.22)	-0.1	0.68171	-0.47	0.08084	-0.37	0.1983	0.19	0.147		-0.16 (1.06)	-0.18 (0.73)	-0.1 (1.04)	-0.14 (0.2)	-0.13 (0.11)	-0.12 (0.11)	-0.01	0.95688	-0.03
167	APP	APP	P05067	249	ADNI	MRM	1	2	0	1	1		Decrease	0 (0.93)	-0.25 (1.04)	0.88 (1.04)	-0.01 (0.14)	-0.28 (0.11)	0.87 (0.09)	0.27	0.1471	-0.88	0	-1.15	0	-0.14 (1.18)	-0.23 (1.09)	-0.38 (0.79)	-0.13 (0.23)	-0.26 (0.16)	-0.42 (0.23)	0.13	0.63885	0.29	0.37903	0.15	0.57469	-0.11	0.4986		1.18 (0.76)	1.02 (0.93)	0.58 (1.21)	1.1 (0.3)	1.02 (0.13)	0.59 (0.16)	0.08	0.8136	0.5
168	APP	APP	P05067	310	EMIF-AD MBD	MRM	NA	1	0	1	1	Decrease		0 (1)	-0.37 (0.97)	0.29 (0.82)	-0.11 (0.1)	-0.38 (0.1)	0.36 (0.07)	0.28	0.05148	-0.46	0.00049	-0.74	0	-0.06 (0.8)	-0.58 (0.87)	-0.73 (1.24)	-0.16 (0.14)	-0.57 (0.17)	-0.75 (0.2)	0.4	0.07245	0.58	0.02025	0.18	0.5077	-0.32	0.0213	Decrease linear	0.46 (1.02)	0.27 (0.77)	0.27 (0.8)	0.51 (0.18)	0.32 (0.1)	0.25 (0.11)	0.19	0.35999	0.26
169	APP_ab38	APP	P05067	910	ADNI	ELISA	0	2	-1	1	1	Decrease	Decrease	0 (1)	-0.84 (0.92)	0.24 (1.11)	0.01 (0.07)	-0.82 (0.06)	0.24 (0.05)	0.82	0	-0.23	0.0119	-1.05	0	-0.72 (0.99)	-0.75 (0.9)	-1.3 (0.71)	-0.73 (0.1)	-0.72 (0.08)	-1.27 (0.13)	-0.02	0.90059	0.54	0.00092	0.56	0.00018	-0.23	0.0022	Decrease linear	0.71 (1.15)	0.38 (1.03)	-0.13 (1.1)	0.68 (0.15)	0.39 (0.07)	-0.13 (0.08)	0.29	0.07596	0.81
170	APP_ab40	APP	P05067	910	ADNI	ELISA	0	2	-1	1	1	Decrease	Decrease	0 (1)	-0.82 (0.94)	0.2 (1.05)	0.01 (0.07)	-0.81 (0.05)	0.2 (0.05)	0.82	0	-0.19	0.03882	-1	0	-0.73 (1.01)	-0.73 (0.94)	-1.27 (0.72)	-0.74 (0.1)	-0.7 (0.07)	-1.25 (0.13)	-0.04	0.72978	0.51	0.00153	0.55	0.00017	-0.22	0.0046	Decrease linear	0.64 (1.21)	0.32 (0.95)	-0.13 (1.06)	0.61 (0.14)	0.32 (0.07)	-0.13 (0.08)	0.28	0.07844	0.74
171	APP	APP	P05067	317	ADNI	ELISA	0	2	-1	0	1			0 (1)	-0.36 (1.07)	0.28 (0.96)	0.01 (0.13)	-0.32 (0.1)	0.28 (0.08)	0.33	0.04349	-0.28	0.07676	-0.6	0	-0.13 (1.14)	-0.36 (1.09)	-0.56 (0.93)	-0.14 (0.19)	-0.32 (0.14)	-0.51 (0.19)	0.18	0.45099	0.37	0.17547	0.19	0.4089	-0.18	0.2076		0.32 (0.9)	0.35 (1.01)	0.18 (0.91)	0.42 (0.27)	0.35 (0.11)	0.16 (0.13)	0.07	0.81927	0.25
172	APP_LVFFAEDVGSNK	APP	P05067	249	ADNI	MRM	0	2	-1	0	1	Decrease		0 (1)	-0.81 (1.09)	0.24 (0.93)	-0.02 (0.14)	-0.83 (0.11)	0.25 (0.09)	0.81	1e-05	-0.27	0.11268	-1.07	0	-0.51 (1.13)	-0.75 (0.94)	-1.22 (1.25)	-0.5 (0.21)	-0.78 (0.15)	-1.23 (0.21)	0.28	0.29076	0.72	0.01709	0.45	0.07942	-0.3	0.0729	Decrease non-linear	0.39 (0.89)	0.42 (0.86)	-0.09 (0.98)	0.26 (0.28)	0.45 (0.12)	-0.07 (0.15)	-0.18	0.54868	0.33
174	AQP4	AQP4	P55087	127	EMIF-AD MBD	MRM	NA		0	0	0			0 (1)	0.4 (1.22)	0.17 (1.21)	0.02 (0.24)	0.36 (0.21)	0.18 (0.15)	-0.34	0.27734	-0.17	0.5601	0.17	0.50081	0.2 (1.46)	0.72 (1.04)	0.42 (0.88)	0.17 (0.33)	0.72 (0.42)	0.42 (0.44)	-0.55	0.30706	-0.25	0.64698	0.3	0.6236	0.15	0.6117		-0.09 (0.96)	0.35 (1.42)	-0.01 (0.92)	-0.06 (0.56)	0.36 (0.21)	-0.01 (0.25)	-0.41	0.48758	-0.05
183	ARHGEF18	ARHGEF18	Q6ZSZ5	131	EMIF-AD MBD	MRM	NA		0	0	0			0 (1)	-0.19 (1.35)	-0.17 (1.21)	-0.2 (0.19)	-0.3 (0.21)	0.02 (0.15)	0.1	0.71292	-0.22	0.39357	-0.32	0.22337	-0.22 (1.36)	0.35 (1.25)	-0.56 (1.42)	-0.62 (0.33)	0.14 (0.45)	-0.62 (0.39)	-0.75	0.17344	0	0.99859	0.75	0.2112	0.09	0.757		0.18 (1.64)	-0.1 (1.08)	-0.35 (1.21)	0.52 (0.43)	-0.01 (0.23)	-0.26 (0.24)	0.52	0.28112	0.78
187	ARSA	ARSA	P15289	310	EMIF-AD MBD	MRM	NA		0	0	0			0 (1)	-0.01 (0.94)	0.05 (0.9)	-0.1 (0.11)	-0.02 (0.1)	0.11 (0.08)	-0.08	0.60811	-0.21	0.13016	-0.13	0.31138	0.07 (0.95)	-0.09 (0.93)	-0.05 (0.99)	-0.05 (0.15)	-0.08 (0.18)	-0.07 (0.22)	0.03	0.90126	0.02	0.94091	-0.01	0.97194	-0.04	0.7883		0.06 (1.03)	0.14 (0.79)	-0.05 (0.96)	0.12 (0.19)	0.21 (0.11)	-0.07 (0.11)	-0.09	0.67087	0.19
189	ART3	ART3	Q13508	310	EMIF-AD MBD	MRM	NA		-1	1	1	Decrease		0 (1)	-0.27 (0.82)	0.43 (0.7)	0.03 (0.1)	-0.28 (0.09)	0.42 (0.07)	0.31	0.02139	-0.4	0.0013	-0.7	0	-0.02 (0.82)	-0.47 (0.71)	-0.54 (0.84)	-0.01 (0.13)	-0.47 (0.15)	-0.53 (0.18)	0.46	0.01848	0.52	0.01764	0.05	0.8149	-0.29	0.0152	Decrease linear	0.36 (0.81)	0.5 (0.67)	0.39 (0.71)	0.36 (0.16)	0.48 (0.09)	0.39 (0.09)	-0.12	0.50029	-0.03
190	ASAH1	ASAH1	Q13510	305	EMIF-AD MBD	MRM	NA		0	0	2			0 (1)	0.14 (1.03)	-0.23 (0.9)	-0.14 (0.11)	0.13 (0.11)	-0.15 (0.08)	-0.27	0.08256	0.01	0.92459	0.28	0.03624	0.42 (0.99)	-0.21 (0.93)	0.08 (1.12)	0.29 (0.16)	-0.2 (0.19)	0.05 (0.22)	0.49	0.04494	0.24	0.3799	-0.26	0.37849	-0.14	0.3215		-0.14 (0.88)	-0.28 (0.89)	-0.2 (0.91)	-0.08 (0.2)	-0.21 (0.11)	-0.22 (0.12)	0.13	0.56182	0.14
192	ASPH	ASPH	Q12797	310	EMIF-AD MBD	MRM	NA		-1	1	1			0 (1)	-0.57 (1)	0.18 (0.69)	-0.06 (0.1)	-0.58 (0.1)	0.22 (0.07)	0.51	0.00027	-0.28	0.03061	-0.79	0	-0.36 (1.03)	-0.73 (0.92)	-0.78 (1)	-0.41 (0.14)	-0.73 (0.16)	-0.8 (0.19)	0.32	0.14045	0.38	0.10778	0.07	0.79347	-0.21	0.1383		0.22 (0.79)	0.23 (0.6)	0.11 (0.74)	0.24 (0.18)	0.26 (0.1)	0.1 (0.1)	-0.02	0.92604	0.14
193	ASTN1	ASTN1	O14525	148	EMIF-AD MBD	MRM	NA		-1	0	1			0 (1)	-0.97 (1.45)	0.04 (1.16)	-0.01 (0.2)	-0.97 (0.22)	0.05 (0.14)	0.96	0.00193	-0.06	0.83121	-1.01	0.00011	-1.01 (1.71)	-0.84 (1.61)	-1.12 (0.61)	-1.03 (0.37)	-0.85 (0.37)	-1.09 (0.48)	-0.18	0.7321	0.06	0.91724	0.24	0.68973	0.04	0.9095		0.5 (1.45)	-0.19 (1.21)	0.14 (0.98)	0.47 (0.4)	-0.16 (0.22)	0.13 (0.22)	0.64	0.16613	0.34
196	ATF6B	ATF6B	Q99941	223	EMIF-AD MBD	MRM	NA		0	0	1			0 (1)	-0.24 (0.81)	0.1 (0.87)	0.08 (0.13)	-0.24 (0.11)	0.06 (0.09)	0.32	0.0618	0.02	0.88653	-0.3	0.04258	-0.2 (0.81)	-0.19 (0.67)	-0.38 (0.97)	-0.15 (0.17)	-0.22 (0.2)	-0.35 (0.22)	0.07	0.79752	0.2	0.47719	0.13	0.67248	-0.13	0.3192		0 (1.11)	0.28 (0.71)	-0.05 (0.92)	-0.04 (0.22)	0.25 (0.13)	-0.04 (0.13)	-0.29	0.25805	0
199	ATOX1	ATOX1	O00244	210	EMIF-AD MBD	MRM	NA		0	1	1			0 (1)	-0.07 (0.96)	0.5 (0.97)	0.03 (0.14)	-0.07 (0.14)	0.48 (0.1)	0.1	0.61003	-0.45	0.01453	-0.55	0.0017	-0.19 (0.74)	0.17 (1.08)	-0.22 (1.11)	-0.16 (0.22)	0.17 (0.23)	-0.21 (0.28)	-0.33	0.29574	0.05	0.88209	0.38	0.29271	-0.03	0.8521		0.2 (1.27)	0.52 (0.76)	0.6 (1.08)	0.18 (0.25)	0.5 (0.14)	0.61 (0.16)	-0.32	0.25667	-0.43
202	ATP1A2	ATP1A2	P50993	110	EMIF-AD MBD	MRM	NA		0	0	0			0 (1)	-0.44 (0.87)	0.06 (0.92)	0.04 (0.22)	-0.41 (0.18)	0.03 (0.12)	0.44	0.11142	0	0.99386	-0.44	0.05164	-0.46 (0.72)	-0.66 (1.06)	-0.02 (0.95)	-0.47 (0.26)	-0.63 (0.32)	-0.06 (0.41)	0.15	0.71261	-0.42	0.38725	-0.57	0.27667	0.22	0.3572		-0.28 (1.17)	0.11 (0.84)	0.07 (0.97)	-0.16 (0.38)	0.09 (0.16)	0.08 (0.19)	-0.25	0.54417	-0.24
205	ATP1B1	ATP1B1	P05026	148	EMIF-AD MBD	MRM	NA		0	0	0			0 (1)	0.05 (1.15)	0 (1.17)	-0.06 (0.18)	0.04 (0.19)	0.04 (0.14)	-0.1	0.71906	-0.1	0.68147	0	0.98916	-0.35 (1.02)	0.52 (1.32)	0.12 (0.84)	-0.45 (0.3)	0.56 (0.33)	0.06 (0.44)	-1.01	0.02919	-0.5	0.34071	0.5	0.36227	0.29	0.2788		-0.4 (0.75)	-0.04 (1.39)	0.18 (0.95)	-0.41 (0.38)	0.02 (0.21)	0.16 (0.22)	-0.44	0.31777	-0.58
206	ATP1B2	ATP1B2	P14415	204	EMIF-AD MBD	MRM	NA		0	1	1			0 (1)	0.08 (0.99)	0.38 (0.9)	-0.07 (0.14)	0.06 (0.14)	0.42 (0.09)	-0.13	0.51706	-0.48	0.00643	-0.35	0.03259	0.23 (1.03)	0.13 (0.63)	-0.35 (1.29)	0.11 (0.19)	0.16 (0.25)	-0.34 (0.3)	-0.04	0.8921	0.45	0.21064	0.5	0.20945	-0.3	0.1419		0.58 (1.13)	0.39 (0.92)	0.31 (0.82)	0.63 (0.26)	0.43 (0.13)	0.3 (0.13)	0.21	0.48452	0.34
209	ATP6AP1	ATP6AP1	Q15904	310	EMIF-AD MBD	MRM	NA		-1	1	1	Decrease		0 (1)	-0.47 (0.86)	0.24 (0.77)	-0.05 (0.1)	-0.48 (0.1)	0.27 (0.07)	0.44	0.00176	-0.32	0.01322	-0.75	0	-0.22 (0.75)	-0.58 (0.87)	-0.87 (0.96)	-0.29 (0.13)	-0.57 (0.16)	-0.87 (0.19)	0.28	0.17856	0.59	0.01216	0.3	0.22257	-0.31	0.0129	Decrease linear	0.29 (0.87)	0.29 (0.73)	0.16 (0.78)	0.32 (0.17)	0.33 (0.1)	0.15 (0.1)	-0.01	0.97905	0.17
210	ATP6AP2	ATP6AP2	O75787	310	EMIF-AD MBD	MRM	NA		0	1	1	Decrease	Decrease	0 (1)	-0.23 (1.01)	0.22 (0.99)	-0.08 (0.12)	-0.24 (0.11)	0.27 (0.08)	0.16	0.30956	-0.35	0.02058	-0.51	0.00034	0.18 (0.94)	-0.63 (0.92)	-0.56 (0.98)	0.1 (0.16)	-0.62 (0.2)	-0.57 (0.23)	0.72	0.00512	0.68	0.01816	-0.05	0.87496	-0.39	0.0068	Decrease linear	0.41 (1.04)	0.37 (0.9)	0 (1.03)	0.45 (0.21)	0.42 (0.12)	-0.02 (0.12)	0.03	0.90435	0.46
212	ATRN	ATRN	O75882	310	EMIF-AD MBD	MRM	NA		0	0	0			0 (1)	-0.03 (1)	0.07 (1.08)	-0.07 (0.12)	-0.04 (0.12)	0.12 (0.09)	-0.03	0.84055	-0.19	0.2216	-0.15	0.28876	0.08 (1.08)	-0.1 (1.08)	-0.15 (0.69)	-0.01 (0.18)	-0.09 (0.21)	-0.16 (0.25)	0.08	0.76771	0.15	0.63486	0.06	0.84569	-0.14	0.3511		0.02 (1.49)	0.04 (1.01)	0.12 (1)	0.07 (0.23)	0.09 (0.13)	0.11 (0.13)	-0.02	0.93421	-0.04
215	AXL	AXL	P30530	270	ADNI	RBM	0	2	-1	1	1		Decrease	0 (1)	-0.45 (0.84)	0.5 (1.08)	-0.01 (0.13)	-0.49 (0.1)	0.49 (0.09)	0.48	0.00474	-0.5	0.00194	-0.99	0	-0.35 (0.82)	-0.38 (0.85)	-0.73 (0.82)	-0.33 (0.2)	-0.44 (0.14)	-0.78 (0.2)	0.11	0.6534	0.46	0.11697	0.34	0.15792	-0.22	0.0857		1 (0.55)	0.62 (1.22)	0.17 (0.85)	0.88 (0.28)	0.61 (0.12)	0.18 (0.15)	0.27	0.36834	0.7
216	AXL	AXL	P30530	310	EMIF-AD MBD	MRM	NA	1	-1	1	1			0 (1)	-0.34 (0.94)	0.27 (0.82)	-0.03 (0.1)	-0.35 (0.1)	0.29 (0.08)	0.32	0.02957	-0.32	0.0163	-0.64	0	-0.14 (0.94)	-0.45 (0.79)	-0.63 (1.07)	-0.19 (0.15)	-0.44 (0.17)	-0.63 (0.21)	0.25	0.26827	0.44	0.08179	0.19	0.4863	-0.25	0.0676		0.42 (1.01)	0.29 (0.7)	0.2 (0.87)	0.44 (0.19)	0.32 (0.11)	0.19 (0.11)	0.12	0.56084	0.25
217	AZGP1	AZGP1	P25311	310	EMIF-AD MBD	MRM	NA		0	0	2			0 (1)	0.28 (0.91)	0.03 (1)	0.07 (0.11)	0.3 (0.11)	-0.02 (0.08)	-0.23	0.12982	0.09	0.52491	0.32	0.01631	0.05 (0.79)	0.43 (0.89)	0.58 (1.08)	0.14 (0.16)	0.42 (0.19)	0.58 (0.23)	-0.28	0.25798	-0.44	0.11405	-0.16	0.59936	0.26	0.0537		0.07 (1.15)	-0.06 (0.89)	0.11 (1.08)	0.01 (0.2)	-0.09 (0.12)	0.12 (0.12)	0.1	0.66982	-0.11
218	B2M	B2M	P61769	249	ADNI	MRM	1	2	-1	1	1			0.02 (0.85)	-0.52 (1.21)	0.43 (1.21)	-0.04 (0.14)	-0.6 (0.11)	0.43 (0.09)	0.56	0.00177	-0.47	0.00595	-1.03	0	-0.47 (1.04)	-0.44 (1.28)	-0.72 (1.23)	-0.41 (0.23)	-0.6 (0.16)	-0.86 (0.23)	0.19	0.51081	0.45	0.17151	0.26	0.34327	-0.18	0.2984		0.86 (0.94)	0.49 (1.15)	0.21 (1.34)	0.46 (0.3)	0.5 (0.13)	0.27 (0.16)	-0.04	0.89058	0.19
219	B2M	B2M	P61769	310	EMIF-AD MBD	MRM	NA	1	-1	1	1			0 (1)	-0.26 (0.91)	0.39 (0.74)	0.08 (0.1)	-0.26 (0.1)	0.35 (0.07)	0.35	0.01261	-0.26	0.03959	-0.61	0	-0.26 (0.92)	-0.24 (0.93)	-0.31 (0.92)	-0.22 (0.14)	-0.24 (0.16)	-0.29 (0.19)	0.02	0.92952	0.07	0.76432	0.05	0.83738	-0.05	0.7205		0.54 (0.84)	0.47 (0.74)	0.26 (0.7)	0.53 (0.18)	0.44 (0.1)	0.27 (0.1)	0.09	0.65342	0.25
220	B3GALNT1	B3GALNT1	O75752	310	EMIF-AD MBD	MRM	NA		-1	1	1	Decrease		0 (1)	-0.5 (0.97)	0.23 (0.84)	-0.04 (0.11)	-0.51 (0.1)	0.25 (0.08)	0.47	0.0017	-0.29	0.03629	-0.76	0	-0.24 (0.89)	-0.56 (0.94)	-0.96 (1.03)	-0.29 (0.15)	-0.56 (0.18)	-0.96 (0.21)	0.27	0.25162	0.67	0.01001	0.4	0.1467	-0.34	0.0156	Decrease linear	0.23 (0.82)	0.31 (0.78)	0.14 (0.91)	0.25 (0.19)	0.34 (0.11)	0.13 (0.11)	-0.09	0.68465	0.12
222	B3GAT3	B3GAT3	O94766	105	EMIF-AD MBD	MRM	NA		-1	0	1			0 (1)	-0.63 (0.93)	0.01 (0.97)	-0.06 (0.22)	-0.67 (0.18)	0.05 (0.13)	0.61	0.03074	-0.11	0.67045	-0.72	0.00175	-0.59 (1.17)	-0.86 (0.6)	-0.39 (0.71)	-0.68 (0.27)	-0.81 (0.33)	-0.44 (0.39)	0.13	0.76051	-0.25	0.60376	-0.38	0.46927	0.1	0.6906		0.1 (1.22)	0.25 (0.81)	-0.26 (0.99)	0.08 (0.32)	0.31 (0.21)	-0.27 (0.2)	-0.22	0.55753	0.35
223	B3GNT2	B3GNT2	Q9NY97	310	EMIF-AD MBD	MRM	NA		0	1	1			0 (1)	-0.3 (1.21)	0.26 (0.81)	-0.05 (0.11)	-0.31 (0.11)	0.29 (0.08)	0.26	0.10344	-0.34	0.0177	-0.6	2e-05	-0.31 (0.73)	-0.07 (1.82)	-0.61 (0.91)	-0.41 (0.16)	-0.06 (0.19)	-0.63 (0.23)	-0.35	0.16362	0.21	0.44514	0.57	0.0603	-0.06	0.7177		0.38 (0.84)	0.32 (0.77)	0.15 (0.84)	0.42 (0.21)	0.37 (0.12)	0.13 (0.12)	0.05	0.83167	0.29
225	B3GNT9	B3GNT9	Q6UX72	225	EMIF-AD MBD	MRM	NA		0	0	0			0 (1)	-0.1 (0.8)	0.01 (0.88)	0.01 (0.13)	-0.1 (0.12)	0 (0.09)	0.1	0.55125	0.01	0.96821	-0.1	0.50741	-0.07 (0.89)	-0.27 (0.66)	0.09 (0.77)	-0.05 (0.17)	-0.27 (0.2)	0.1 (0.24)	0.21	0.40897	-0.15	0.59812	-0.37	0.23649	0.04	0.7594		-0.1 (0.81)	0.14 (0.77)	-0.12 (1.04)	-0.11 (0.21)	0.13 (0.12)	-0.12 (0.13)	-0.24	0.32444	0.02
226	B4GALNT1	B4GALNT1	Q00973	201	EMIF-AD MBD	MRM	NA		0	0	0			0 (1)	-0.18 (1.05)	0.22 (1.07)	0.11 (0.16)	-0.16 (0.15)	0.16 (0.11)	0.27	0.21249	-0.05	0.79424	-0.32	0.0878	-0.22 (1.02)	-0.03 (0.98)	-0.3 (1.25)	-0.26 (0.24)	0.02 (0.28)	-0.25 (0.32)	-0.27	0.45921	0	0.99732	0.27	0.52468	-0.15	0.4786		0.16 (1.37)	0.35 (0.92)	0.07 (1.13)	0.16 (0.28)	0.32 (0.15)	0.1 (0.17)	-0.16	0.61584	0.06
228	B4GALT1	B4GALT1	P15291	304	EMIF-AD MBD	MRM	NA		0	1	1			0 (1)	-0.29 (0.89)	0.36 (0.78)	-0.03 (0.1)	-0.29 (0.1)	0.38 (0.07)	0.26	0.06979	-0.41	0.00233	-0.67	0	-0.14 (0.93)	-0.4 (0.77)	-0.49 (0.96)	-0.15 (0.14)	-0.4 (0.17)	-0.5 (0.21)	0.24	0.274	0.34	0.18163	0.1	0.71469	-0.19	0.1491		0.33 (0.77)	0.41 (0.78)	0.31 (0.81)	0.34 (0.18)	0.42 (0.1)	0.31 (0.11)	-0.09	0.66859	0.03
231	B4GALT5	B4GALT5	O43286	214	EMIF-AD MBD	MRM	NA		0	1	1			0 (1)	-0.26 (0.83)	0.34 (0.82)	0 (0.12)	-0.27 (0.12)	0.35 (0.09)	0.27	0.12521	-0.35	0.03008	-0.61	6e-05	-0.11 (0.86)	-0.35 (0.59)	-0.48 (1.13)	-0.13 (0.17)	-0.35 (0.19)	-0.48 (0.26)	0.22	0.39469	0.36	0.26022	0.13	0.68008	-0.21	0.1909		0.4 (0.99)	0.46 (0.8)	0.21 (0.8)	0.41 (0.25)	0.46 (0.12)	0.21 (0.12)	-0.06	0.84251	0.2
232	B4GAT1	B4GAT1	O43505	249	ADNI	MRM	1	2	-1	1	1		Decrease	0 (0.94)	-0.74 (1.25)	0.63 (1.12)	-0.03 (0.16)	-0.77 (0.12)	0.64 (0.1)	0.75	0.0002	-0.67	0.00042	-1.41	0	-0.51 (1.33)	-0.74 (1.23)	-0.99 (1.22)	-0.5 (0.25)	-0.79 (0.17)	-1.02 (0.25)	0.29	0.34617	0.53	0.13863	0.24	0.42937	-0.24	0.2071		1.05 (0.79)	0.8 (0.98)	0.25 (1.32)	0.87 (0.33)	0.83 (0.14)	0.28 (0.18)	0.04	0.90071	0.59
233	B4GAT1	B4GAT1	O43505	310	EMIF-AD MBD	MRM	NA	1	-1	1	1	Decrease		0 (1)	-0.37 (0.88)	0.33 (0.77)	-0.03 (0.1)	-0.37 (0.1)	0.35 (0.07)	0.35	0.01384	-0.38	0.00354	-0.72	0	-0.14 (0.77)	-0.42 (0.79)	-0.79 (1.09)	-0.19 (0.14)	-0.41 (0.16)	-0.79 (0.19)	0.22	0.29596	0.6	0.01118	0.38	0.13372	-0.3	0.0184	Decrease linear	0.5 (1.03)	0.35 (0.71)	0.25 (0.73)	0.53 (0.17)	0.38 (0.1)	0.24 (0.1)	0.15	0.44369	0.29
234	BACE1	BACE1	P56817	249	ADNI	ELISA	0		0	1	1		Decrease	0 (1)	-0.49 (2.39)	0.78 (0.89)	-0.02 (0.22)	-0.48 (0.17)	0.79 (0.15)	0.47	0.09747	-0.81	0.00268	-1.28	0	-0.12 (0.96)	-0.61 (3.22)	-0.6 (0.92)	-0.14 (0.38)	-0.6 (0.26)	-0.57 (0.37)	0.46	0.31595	0.44	0.41179	-0.03	0.95267	-0.14	0.7092		1.23 (0.53)	0.85 (0.82)	0.53 (1.01)	1.14 (0.49)	0.89 (0.21)	0.54 (0.26)	0.25	0.64299	0.6
236	BACE1_activity	BACE1	P56817	317	ADNI	Other	0		0	1	1		Decrease	0 (1)	-0.35 (1.01)	0.81 (1.39)	-0.01 (0.16)	-0.37 (0.11)	0.8 (0.1)	0.36	0.06462	-0.81	2e-05	-1.17	0	-0.21 (1.18)	-0.3 (1.05)	-0.57 (0.72)	-0.21 (0.24)	-0.33 (0.17)	-0.61 (0.23)	0.13	0.66394	0.4	0.22899	0.28	0.33055	-0.16	0.2438		1.08 (1.32)	1.02 (1.51)	0.44 (1.16)	1 (0.33)	1.02 (0.14)	0.45 (0.16)	-0.02	0.95664	0.55
239	BASP1	BASP1	P80723	249	ADNI	MRM	0	2	0	1	1	Decrease		0 (1)	0.04 (0.84)	0.48 (0.24)	-0.01 (0.1)	0.03 (0.07)	0.48 (0.06)	-0.04	0.76171	-0.49	3e-05	-0.45	1e-05	0.01 (0.91)	0.16 (0.61)	-0.16 (1.15)	0.02 (0.13)	0.13 (0.09)	-0.19 (0.13)	-0.11	0.49835	0.21	0.23699	0.32	0.0365	-0.15	0.2684	Decrease non-linear	0.44 (0.22)	0.51 (0.24)	0.46 (0.24)	0.38 (0.17)	0.51 (0.07)	0.47 (0.09)	-0.13	0.47706	-0.09
240	BASP1	BASP1	P80723	310	EMIF-AD MBD	MRM	NA	1	-1	1	1			0 (1)	-0.42 (0.93)	0.88 (0.91)	-0.03 (0.11)	-0.43 (0.11)	0.9 (0.08)	0.4	0.00826	-0.93	0	-1.33	0	-0.28 (0.77)	-0.4 (0.92)	-0.76 (1.17)	-0.34 (0.16)	-0.4 (0.19)	-0.76 (0.22)	0.06	0.81978	0.42	0.1188	0.37	0.20596	-0.21	0.1324		0.87 (1.08)	0.9 (0.76)	0.85 (1.01)	0.91 (0.2)	0.93 (0.11)	0.84 (0.12)	-0.02	0.91453	0.07
241	BCAM	BCAM	P50895	310	EMIF-AD MBD	MRM	NA		-1	0	1			0 (1)	-0.37 (0.91)	0.4 (1)	0.08 (0.11)	-0.37 (0.11)	0.35 (0.08)	0.45	0.00474	-0.27	0.06529	-0.72	0	-0.32 (0.8)	-0.33 (1.11)	-0.54 (0.85)	-0.27 (0.17)	-0.33 (0.2)	-0.53 (0.24)	0.06	0.80882	0.26	0.36779	0.2	0.52418	-0.12	0.3598		0.6 (1.1)	0.44 (1.05)	0.28 (0.91)	0.58 (0.21)	0.4 (0.12)	0.29 (0.12)	0.18	0.46942	0.29
242	BCAN	BCAN	Q96GW7	310	EMIF-AD MBD	MRM	NA		0	1	1			0 (1)	-0.24 (0.9)	0.29 (0.73)	-0.08 (0.1)	-0.26 (0.09)	0.34 (0.07)	0.18	0.18778	-0.42	0.00085	-0.6	0	-0.06 (0.82)	-0.4 (0.77)	-0.42 (1.19)	-0.16 (0.13)	-0.39 (0.16)	-0.43 (0.19)	0.23	0.25431	0.28	0.22742	0.04	0.86681	-0.17	0.208		0.42 (0.94)	0.31 (0.68)	0.23 (0.71)	0.48 (0.17)	0.36 (0.1)	0.21 (0.1)	0.11	0.55151	0.26
243	BCHE	BCHE	P06276	310	EMIF-AD MBD	MRM	NA		0	0	0			0 (1)	0.11 (1.48)	-0.11 (1.01)	-0.13 (0.13)	0.09 (0.13)	-0.03 (0.09)	-0.22	0.2298	-0.09	0.58885	0.13	0.419	0.31 (1.59)	0.14 (1.51)	-0.37 (1.11)	0.18 (0.2)	0.15 (0.24)	-0.4 (0.28)	0.03	0.91267	0.58	0.09456	0.55	0.14206	-0.32	0.1424		-0.09 (1.02)	-0.1 (0.94)	-0.13 (1.1)	-0.03 (0.26)	-0.02 (0.14)	-0.15 (0.15)	-0.01	0.97859	0.12
245	BDNF	BDNF	P23560	303	EMIF-AD MBD	MRM	NA		-1	0	1	Decrease	Decrease	0 (1)	-0.73 (0.99)	0.05 (0.89)	-0.08 (0.11)	-0.74 (0.11)	0.1 (0.08)	0.67	2e-05	-0.18	0.21435	-0.84	0	-0.4 (0.69)	-0.9 (0.92)	-1.18 (1.35)	-0.48 (0.16)	-0.89 (0.18)	-1.19 (0.22)	0.42	0.08409	0.72	0.00798	0.3	0.29899	-0.39	0.0058	Decrease linear	0.18 (0.87)	0.17 (0.85)	-0.12 (0.93)	0.22 (0.2)	0.21 (0.11)	-0.13 (0.12)	0.01	0.97481	0.34
246	BGLAP	BGLAP	P02818	154	EMIF-AD MBD	MRM	NA		0	1	0			0 (1)	0.23 (1.02)	0.68 (0.99)	0.09 (0.18)	0.25 (0.15)	0.63 (0.12)	-0.17	0.47945	-0.54	0.01664	-0.37	0.05616	0.22 (1.06)	0.21 (0.87)	0.26 (1.15)	0.36 (0.22)	0.14 (0.32)	0.28 (0.31)	0.22	0.57884	0.08	0.83843	-0.14	0.74957	-0.01	0.9513		0.55 (0.87)	0.93 (1.02)	0.44 (0.96)	0.45 (0.34)	0.88 (0.17)	0.44 (0.17)	-0.43	0.24653	0
247	BGN	BGN	P21810	310	EMIF-AD MBD	MRM	NA		0	0	0			0 (1)	-0.05 (1.14)	0.04 (1.06)	0.06 (0.12)	-0.06 (0.12)	0.02 (0.09)	0.12	0.48072	0.04	0.78661	-0.08	0.60069	0.04 (1.1)	0.1 (1)	-0.43 (1.35)	0.02 (0.18)	0.1 (0.21)	-0.41 (0.25)	-0.08	0.76348	0.43	0.1668	0.51	0.12334	-0.17	0.2932		-0.09 (1.19)	0.14 (0.97)	-0.02 (1.11)	-0.06 (0.23)	0.13 (0.13)	-0.01 (0.13)	-0.18	0.48471	-0.05
248	BLMH	BLMH	Q13867	283	EMIF-AD MBD	MRM	NA		0	1	1	Decrease		0 (1)	0 (1.12)	0.55 (0.91)	-0.08 (0.13)	-0.01 (0.12)	0.59 (0.09)	-0.07	0.67817	-0.66	4e-05	-0.59	5e-05	0.32 (0.85)	-0.11 (1.03)	-0.59 (1.56)	0.22 (0.17)	-0.11 (0.19)	-0.58 (0.25)	0.33	0.198	0.81	0.00862	0.48	0.13876	-0.4	0.02	Decrease linear	0.45 (1.06)	0.55 (0.87)	0.58 (0.92)	0.5 (0.22)	0.59 (0.12)	0.57 (0.13)	-0.09	0.72393	-0.07
250	BLVRB	BLVRB	P30043	175	EMIF-AD MBD	MRM	NA		0	0	2			0 (1)	0.34 (0.76)	-0.08 (0.62)	0.1 (0.12)	0.34 (0.12)	-0.13 (0.08)	-0.24	0.15324	0.23	0.12923	0.47	0.00133	0.19 (0.58)	0.66 (0.97)	0.04 (0.45)	0.26 (0.17)	0.66 (0.17)	0.06 (0.23)	-0.39	0.09989	0.2	0.48631	0.59	0.03946	-0.03	0.8376		0.03 (0.57)	-0.07 (0.7)	-0.15 (0.51)	0.01 (0.17)	-0.1 (0.1)	-0.14 (0.11)	0.11	0.55914	0.15
251	BMP1	BMP1	P13497	294	EMIF-AD MBD	MRM	NA		-1	0	1			0 (1)	-0.38 (0.86)	0.12 (0.93)	-0.01 (0.11)	-0.39 (0.11)	0.13 (0.08)	0.38	0.0167	-0.14	0.33148	-0.52	0.0002	-0.28 (0.85)	-0.51 (0.8)	-0.44 (0.97)	-0.33 (0.16)	-0.5 (0.2)	-0.45 (0.24)	0.17	0.51627	0.12	0.66432	-0.04	0.88826	-0.11	0.4315		0.18 (0.91)	0.14 (0.75)	0.08 (1.11)	0.2 (0.2)	0.17 (0.12)	0.07 (0.12)	0.04	0.86544	0.14
252	BMP6	BMP6	P22004	150	EMIF-AD MBD	MRM	NA		0	0	0			0 (1)	0.25 (1.3)	0.13 (1.14)	0.02 (0.2)	0.25 (0.19)	0.12 (0.14)	-0.23	0.40773	-0.1	0.69094	0.13	0.58419	0.1 (1.08)	0.63 (1.67)	-0.11 (1.01)	0.1 (0.28)	0.63 (0.34)	-0.11 (0.5)	-0.54	0.23078	0.21	0.71903	0.74	0.22334	0.06	0.8317		-0.05 (1.08)	0.13 (1.14)	0.2 (1.19)	-0.05 (0.39)	0.13 (0.2)	0.2 (0.24)	-0.17	0.6899	-0.25
259	BSG	BSG	P35613	310	EMIF-AD MBD	MRM	NA		-1	1	1	Decrease		0 (1)	-0.47 (0.85)	0.3 (0.77)	-0.02 (0.1)	-0.48 (0.1)	0.31 (0.07)	0.46	0.00084	-0.33	0.0092	-0.79	0	-0.29 (0.79)	-0.49 (0.83)	-0.81 (0.94)	-0.34 (0.13)	-0.49 (0.16)	-0.81 (0.19)	0.15	0.48041	0.47	0.04196	0.33	0.19037	-0.23	0.0641	Decrease non-linear	0.43 (0.83)	0.34 (0.72)	0.21 (0.8)	0.47 (0.17)	0.36 (0.1)	0.2 (0.1)	0.11	0.5851	0.26
260	BST1	BST1	Q10588	151	EMIF-AD MBD	MRM	NA		0	0	0			0 (1)	-0.37 (1.22)	-0.15 (1.1)	-0.02 (0.18)	-0.39 (0.19)	-0.13 (0.14)	0.37	0.16061	0.11	0.65508	-0.27	0.25891	-0.29 (1.06)	-0.33 (1.49)	-0.72 (1.16)	-0.32 (0.29)	-0.35 (0.34)	-0.73 (0.52)	0.04	0.93638	0.41	0.49144	0.38	0.54522	-0.15	0.6227		-0.09 (1.2)	-0.08 (1.05)	-0.27 (1.18)	-0.12 (0.37)	-0.06 (0.19)	-0.26 (0.23)	-0.06	0.89087	0.15
261	BTD	BTD	P43251	249	ADNI	MRM	1	2	-1	0	1			0 (0.98)	-0.66 (1.28)	0.3 (1.18)	-0.04 (0.16)	-0.73 (0.12)	0.29 (0.1)	0.69	0.00059	-0.33	0.08174	-1.02	0	-0.63 (1.22)	-0.67 (1.36)	-0.67 (1.23)	-0.59 (0.25)	-0.78 (0.18)	-0.76 (0.25)	0.19	0.53686	0.17	0.62645	-0.02	0.95328	-0.05	0.8162		0.81 (0.89)	0.42 (1.08)	-0.04 (1.32)	0.53 (0.33)	0.43 (0.14)	0 (0.18)	0.09	0.79621	0.53
262	BTD	BTD	P43251	310	EMIF-AD MBD	MRM	NA	1	0	1	1		Decrease	0 (1)	-0.18 (0.68)	0.27 (0.73)	-0.07 (0.09)	-0.19 (0.09)	0.31 (0.07)	0.12	0.36926	-0.38	0.00124	-0.5	1e-05	-0.08 (0.78)	-0.31 (0.54)	-0.19 (0.65)	-0.14 (0.12)	-0.31 (0.14)	-0.2 (0.17)	0.16	0.39212	0.06	0.78816	-0.11	0.63884	-0.06	0.5471		0.54 (0.79)	0.25 (0.68)	0.21 (0.76)	0.57 (0.15)	0.28 (0.09)	0.19 (0.09)	0.29	0.10351	0.38
265	C11orf87	C11orf87	Q6NUJ2	207	EMIF-AD MBD	MRM	NA		-1	0	1			0 (1)	-0.62 (1)	0.18 (0.97)	-0.07 (0.14)	-0.63 (0.13)	0.23 (0.1)	0.56	0.00371	-0.3	0.09158	-0.86	0	-0.32 (0.75)	-0.73 (0.95)	-1.06 (1.35)	-0.46 (0.2)	-0.68 (0.23)	-1.06 (0.27)	0.21	0.49	0.6	0.07875	0.39	0.28314	-0.31	0.0848		0.38 (0.99)	0.31 (0.89)	-0.02 (1.03)	0.44 (0.25)	0.35 (0.15)	-0.03 (0.15)	0.09	0.74723	0.47
266	C12orf49	C12orf49	Q9H741	302	EMIF-AD MBD	MRM	NA		-1	0	1			0 (1)	-0.44 (1.03)	0.29 (0.94)	0.03 (0.11)	-0.44 (0.11)	0.27 (0.08)	0.48	0.00318	-0.24	0.10501	-0.72	0	-0.32 (0.87)	-0.35 (0.98)	-0.81 (1.34)	-0.33 (0.17)	-0.35 (0.2)	-0.81 (0.24)	0.02	0.93411	0.48	0.10407	0.46	0.14519	-0.27	0.0787		0.23 (1.01)	0.46 (0.95)	0.13 (0.88)	0.24 (0.21)	0.45 (0.12)	0.13 (0.12)	-0.22	0.36863	0.1
267	C14orf37	C14orf37	Q86TY3	310	EMIF-AD MBD	MRM	NA		-1	1	1	Decrease	Decrease	0 (1)	-0.41 (0.93)	0.3 (0.62)	-0.05 (0.09)	-0.42 (0.09)	0.34 (0.07)	0.37	0.00452	-0.39	0.00151	-0.76	0	-0.13 (0.89)	-0.54 (0.84)	-0.83 (0.97)	-0.2 (0.12)	-0.54 (0.15)	-0.84 (0.17)	0.34	0.07514	0.65	0.00248	0.31	0.17799	-0.32	0.0154	Decrease linear	0.46 (0.63)	0.36 (0.57)	0.19 (0.67)	0.5 (0.16)	0.39 (0.09)	0.18 (0.09)	0.1	0.5687	0.32
268	C16orf89	C16orf89	Q6UX73	310	EMIF-AD MBD	MRM	NA		-1	1	1			0 (1)	-0.31 (0.94)	0.38 (0.78)	0.02 (0.1)	-0.31 (0.1)	0.36 (0.07)	0.33	0.02173	-0.34	0.01166	-0.67	0	-0.16 (1.03)	-0.42 (0.66)	-0.47 (1.07)	-0.16 (0.14)	-0.42 (0.17)	-0.47 (0.2)	0.26	0.24048	0.31	0.21241	0.05	0.85986	-0.17	0.2209		0.56 (0.78)	0.46 (0.75)	0.22 (0.81)	0.55 (0.18)	0.46 (0.1)	0.22 (0.11)	0.09	0.65488	0.33
271	C1QA	C1QA	P02745	310	EMIF-AD MBD	MRM	NA		0	0	1			0 (1)	-0.07 (0.91)	0.29 (0.87)	0.12 (0.1)	-0.07 (0.1)	0.23 (0.08)	0.19	0.1926	-0.12	0.38819	-0.31	0.01649	0.04 (0.97)	-0.17 (0.66)	-0.17 (1.1)	0.1 (0.15)	-0.17 (0.18)	-0.14 (0.21)	0.27	0.24547	0.24	0.35436	-0.03	0.90974	-0.14	0.3123		0.38 (0.87)	0.37 (0.92)	0.18 (0.8)	0.36 (0.19)	0.32 (0.11)	0.2 (0.11)	0.04	0.85357	0.16
272	C1QB	C1QB	P02746	249	ADNI	MRM	1	2	0	0	1			0 (0.98)	-0.26 (1.01)	0.18 (0.99)	-0.05 (0.12)	-0.34 (0.1)	0.18 (0.08)	0.29	0.06551	-0.22	0.13706	-0.51	6e-05	-0.23 (0.83)	-0.19 (1.15)	-0.42 (0.89)	-0.18 (0.2)	-0.31 (0.14)	-0.53 (0.2)	0.13	0.58913	0.35	0.21406	0.22	0.35768	-0.16	0.2625		0.35 (1.08)	0.24 (0.88)	0.05 (1.12)	0.04 (0.26)	0.25 (0.11)	0.09 (0.14)	-0.2	0.471	-0.04
273	C1QB	C1QB	P02746	310	EMIF-AD MBD	MRM	NA	1	0	0	1			0 (1)	-0.14 (0.98)	0.28 (0.92)	0.12 (0.11)	-0.14 (0.11)	0.21 (0.08)	0.27	0.08078	-0.09	0.5269	-0.36	0.00777	-0.03 (1.02)	-0.28 (0.78)	-0.19 (1.18)	0.04 (0.16)	-0.28 (0.19)	-0.16 (0.23)	0.32	0.19189	0.2	0.46209	-0.12	0.67966	-0.12	0.3926		0.39 (0.93)	0.34 (0.98)	0.17 (0.85)	0.37 (0.2)	0.28 (0.11)	0.2 (0.12)	0.09	0.7136	0.17
274	C1QC	C1QC	P02747	310	EMIF-AD MBD	MRM	NA		0	0	1			0 (1)	-0.12 (1)	0.22 (0.92)	0.13 (0.11)	-0.12 (0.11)	0.15 (0.08)	0.25	0.1083	-0.02	0.89532	-0.26	0.04778	-0.05 (1.06)	-0.08 (0.73)	-0.32 (1.23)	0.03 (0.16)	-0.08 (0.19)	-0.29 (0.23)	0.11	0.65458	0.32	0.25199	0.21	0.48816	-0.17	0.2514		0.34 (0.9)	0.25 (0.98)	0.14 (0.87)	0.32 (0.2)	0.19 (0.12)	0.16 (0.12)	0.13	0.57465	0.16
277	C1QL3	C1QL3	Q5VWW1	155	EMIF-AD MBD	MRM	NA		-1	0	1	Decrease		0 (1)	-0.66 (0.95)	0.27 (0.95)	0.09 (0.15)	-0.75 (0.15)	0.26 (0.11)	0.84	0.00013	-0.17	0.37458	-1.01	0	-0.25 (0.75)	-0.76 (1.04)	-1.19 (0.89)	-0.31 (0.23)	-0.86 (0.25)	-1.12 (0.29)	0.55	0.10796	0.8	0.03294	0.25	0.51013	-0.43	0.0262	Decrease linear	0.58 (0.92)	0.34 (0.9)	0.05 (1.02)	0.59 (0.29)	0.35 (0.16)	0.11 (0.18)	0.25	0.4559	0.49
279	C1QTNF1	C1QTNF1	Q9BXJ1	167	EMIF-AD MBD	MRM	NA		-1	0	0			0 (1)	-0.57 (1.5)	-0.45 (1.33)	0.06 (0.22)	-0.57 (0.21)	-0.47 (0.14)	0.63	0.0403	0.53	0.05144	-0.1	0.69679	-0.58 (1.52)	-0.17 (1.04)	-1.34 (2.1)	-0.58 (0.34)	-0.12 (0.37)	-1.37 (0.52)	-0.47	0.35625	0.79	0.20685	1.26	0.05374	-0.25	0.4566		-0.18 (0.88)	-0.38 (1.27)	-0.58 (1.49)	-0.2 (0.42)	-0.39 (0.23)	-0.58 (0.22)	0.18	0.69887	0.38
280	C1QTNF3	C1QTNF3	Q9BXJ4	295	EMIF-AD MBD	MRM	NA		-1	0	1			0 (1)	-0.46 (1)	-0.15 (0.88)	-0.18 (0.11)	-0.49 (0.11)	-0.04 (0.08)	0.31	0.04082	-0.14	0.31347	-0.45	0.00078	-0.24 (1.05)	-0.58 (0.92)	-0.75 (0.98)	-0.44 (0.15)	-0.58 (0.19)	-0.79 (0.21)	0.14	0.56012	0.35	0.18348	0.21	0.4623	-0.17	0.2187		-0.23 (1.02)	-0.11 (0.84)	-0.16 (0.88)	-0.15 (0.19)	0.01 (0.11)	-0.2 (0.11)	-0.16	0.4547	0.05
281	C1QTNF4	C1QTNF4	Q9BXJ3	241	EMIF-AD MBD	MRM	NA		0	1	1			0 (1)	-0.02 (0.85)	0.26 (0.71)	-0.04 (0.11)	-0.03 (0.11)	0.29 (0.08)	-0.01	0.95741	-0.32	0.0253	-0.32	0.02062	0.15 (0.54)	-0.11 (1.11)	-0.26 (0.99)	0.1 (0.15)	-0.13 (0.18)	-0.28 (0.22)	0.22	0.33207	0.37	0.15312	0.15	0.593	-0.21	0.1618		0.38 (0.6)	0.22 (0.64)	0.26 (0.83)	0.42 (0.18)	0.24 (0.1)	0.26 (0.11)	0.18	0.38785	0.16
282	C1QTNF5	C1QTNF5	Q9BXJ0	96	EMIF-AD MBD	MRM	NA		1	0	0			0 (1)	0.57 (1.04)	0.44 (1.04)	-0.1 (0.26)	0.57 (0.19)	0.47 (0.15)	-0.67	0.04415	-0.57	0.07075	0.1	0.68137	0.49 (1.18)	0.58 (0.72)	0.76 (1.14)	0.44 (0.28)	0.63 (0.38)	0.7 (0.44)	-0.19	0.68878	-0.26	0.61256	-0.07	0.90443	0.08	0.7673		0.82 (1.26)	0.27 (1.16)	0.5 (0.91)	0.78 (0.48)	0.35 (0.25)	0.47 (0.22)	0.43	0.42805	0.31
283	C1R	C1R	P00736	310	EMIF-AD MBD	MRM	NA		0	0	1			0 (1)	-0.1 (0.76)	0.28 (0.82)	0.08 (0.1)	-0.1 (0.1)	0.24 (0.07)	0.18	0.18202	-0.16	0.2174	-0.34	0.00481	-0.08 (0.72)	-0.04 (0.76)	-0.25 (0.84)	-0.02 (0.14)	-0.04 (0.16)	-0.23 (0.19)	0.02	0.92719	0.21	0.37841	0.19	0.45638	-0.09	0.408		0.3 (0.77)	0.31 (0.78)	0.24 (0.88)	0.29 (0.17)	0.27 (0.1)	0.26 (0.1)	0.02	0.91209	0.03
284	C1RL	C1RL	Q9NZP8	310	EMIF-AD MBD	MRM	NA		0	0	0	Increase		0 (1)	-0.01 (0.93)	-0.03 (0.71)	0.05 (0.1)	-0.01 (0.1)	-0.06 (0.07)	0.06	0.68777	0.11	0.40854	0.05	0.68019	-0.45 (0.97)	0.31 (0.66)	0.44 (0.79)	-0.44 (0.13)	0.31 (0.15)	0.44 (0.18)	-0.75	0.00026	-0.87	0.00013	-0.12	0.60917	0.45	0.0005	Increase linear	0.02 (0.67)	0.05 (0.69)	-0.14 (0.73)	0.02 (0.17)	0.05 (0.09)	-0.14 (0.1)	-0.03	0.88156	0.16
285	C1S	C1S	P09871	310	EMIF-AD MBD	MRM	NA		0	0	1			0 (1)	-0.18 (0.81)	0.28 (0.9)	0.09 (0.1)	-0.18 (0.1)	0.23 (0.08)	0.27	0.06598	-0.14	0.29854	-0.41	0.00143	-0.15 (0.76)	-0.13 (0.79)	-0.31 (0.95)	-0.09 (0.15)	-0.13 (0.18)	-0.29 (0.21)	0.04	0.84994	0.2	0.43321	0.16	0.56728	-0.09	0.4629		0.25 (0.81)	0.32 (0.87)	0.24 (0.95)	0.23 (0.19)	0.27 (0.11)	0.26 (0.11)	-0.03	0.87928	-0.02
286	C2	C2	P06681	249	ADNI	MRM	1	2	0	0	1			0 (0.97)	-0.19 (1.08)	0.03 (1.06)	-0.04 (0.14)	-0.27 (0.11)	0.01 (0.09)	0.23	0.18537	-0.05	0.76972	-0.28	0.04494	-0.34 (0.73)	-0.18 (1.15)	-0.06 (1.22)	-0.28 (0.22)	-0.32 (0.15)	-0.19 (0.22)	0.03	0.90071	-0.09	0.7647	-0.13	0.62873	0.11	0.5289		0.5 (0.72)	-0.04 (1.07)	0 (1.1)	0.22 (0.29)	-0.06 (0.12)	0.04 (0.15)	0.28	0.36677	0.18
287	C2	C2	P06681	310	EMIF-AD MBD	MRM	NA	1	0	0	2	Increase		0 (1)	0.12 (0.83)	-0.2 (0.95)	-0.04 (0.11)	0.12 (0.11)	-0.18 (0.08)	-0.16	0.29184	0.14	0.33621	0.3	0.02653	-0.18 (0.67)	0.33 (0.85)	0.48 (0.93)	-0.23 (0.15)	0.33 (0.18)	0.46 (0.22)	-0.57	0.0197	-0.69	0.01015	-0.13	0.65816	0.38	0.0016	Increase linear	-0.39 (1.08)	-0.2 (0.81)	-0.13 (1.06)	-0.37 (0.2)	-0.16 (0.11)	-0.15 (0.12)	-0.21	0.35308	-0.23
288	C2orf40	C2orf40	Q9H1Z8	310	EMIF-AD MBD	MRM	NA		0	0	0			0 (1)	-0.1 (1.18)	-0.27 (1.09)	-0.22 (0.12)	-0.12 (0.12)	-0.14 (0.09)	-0.1	0.56387	-0.07	0.64107	0.03	0.8651	0.12 (1.13)	-0.22 (1.02)	-0.41 (1.44)	-0.06 (0.18)	-0.21 (0.22)	-0.45 (0.26)	0.15	0.60006	0.4	0.21275	0.25	0.46989	-0.14	0.3573		-0.74 (1.44)	-0.24 (0.96)	-0.13 (1.07)	-0.67 (0.23)	-0.13 (0.13)	-0.17 (0.14)	-0.54	0.04384	-0.49
289	C3	C3	P01024	249	ADNI	MRM	1	2	0	0	1			-0.03 (0.77)	-0.14 (0.99)	0.05 (0.8)	-0.06 (0.11)	-0.2 (0.09)	0.04 (0.07)	0.14	0.31602	-0.1	0.45261	-0.24	0.03212	-0.25 (0.81)	-0.18 (1.02)	0.04 (1.09)	-0.22 (0.18)	-0.28 (0.13)	-0.05 (0.18)	0.06	0.77897	-0.17	0.51485	-0.23	0.28883	0.1	0.4943		0.22 (0.37)	0 (0.81)	0.09 (0.87)	-0.01 (0.24)	0 (0.1)	0.12 (0.13)	-0.01	0.9842	-0.13
290	C3	C3	P01024	310	EMIF-AD MBD	MRM	NA	1	0	0	0			0 (1)	-0.07 (0.89)	-0.2 (0.92)	0.02 (0.11)	-0.07 (0.11)	-0.21 (0.08)	0.08	0.5782	0.23	0.09415	0.15	0.25727	-0.25 (0.92)	0.19 (0.86)	-0.07 (0.83)	-0.23 (0.16)	0.19 (0.19)	-0.08 (0.22)	-0.43	0.07965	-0.15	0.57125	0.27	0.34237	0.1	0.4488		-0.22 (1.11)	-0.2 (0.82)	-0.19 (0.97)	-0.24 (0.2)	-0.2 (0.11)	-0.19 (0.12)	-0.03	0.88608	-0.04
291	C3_LSINTHPSQKPLSITVR	C3	P01024	249	ADNI	MRM	0	0	1	1	0			0 (1)	0.39 (0.53)	0.25 (0.78)	-0.01 (0.11)	0.35 (0.08)	0.24 (0.07)	-0.37	0.00705	-0.26	0.04682	0.11	0.30075	0.28 (0.72)	0.51 (0.15)	0.24 (0.73)	0.29 (0.15)	0.48 (0.1)	0.2 (0.15)	-0.18	0.3198	0.09	0.6802	0.27	0.13091	-0.04	0.6066		0.5 (0.32)	0.32 (0.68)	0.07 (0.99)	0.43 (0.2)	0.32 (0.09)	0.08 (0.11)	0.12	0.58751	0.35
292	C3_TGLQEVEVK	C3	P01024	249	ADNI	MRM	0	0	0	0	0			0 (1)	0.01 (0.98)	-0.19 (0.96)	-0.01 (0.14)	-0.01 (0.11)	-0.2 (0.09)	0.01	0.97357	0.19	0.25135	0.18	0.1865	-0.06 (0.98)	-0.12 (1.03)	0.34 (0.83)	-0.05 (0.22)	-0.15 (0.15)	0.31 (0.21)	0.1	0.71396	-0.37	0.23097	-0.46	0.07282	0.22	0.1587		-0.32 (0.91)	-0.19 (0.95)	-0.16 (0.99)	-0.39 (0.28)	-0.19 (0.12)	-0.15 (0.15)	-0.2	0.51537	-0.23
293	C3_VPVAVQGEDTVQSLTQGDGVAK	C3	P01024	249	ADNI	MRM	0	0	0	0	0			0 (1)	-0.09 (1.12)	-0.28 (1.42)	0 (0.18)	-0.09 (0.14)	-0.27 (0.12)	0.08	0.71589	0.27	0.21297	0.18	0.30569	-0.06 (1.16)	-0.08 (1.1)	-0.16 (1.17)	-0.06 (0.3)	-0.07 (0.21)	-0.14 (0.29)	0	0.99231	0.08	0.85175	0.07	0.83225	-0.03	0.851		-0.16 (1.3)	-0.34 (1.42)	-0.22 (1.49)	-0.18 (0.39)	-0.33 (0.17)	-0.22 (0.21)	0.15	0.72404	0.04
294	C4A	C4A	P0C0L4	249	ADNI	MRM	1	2	-1	0	1			0 (0.98)	-0.36 (0.98)	0.12 (0.94)	-0.04 (0.12)	-0.42 (0.1)	0.12 (0.08)	0.38	0.01436	-0.16	0.28545	-0.54	2e-05	-0.4 (0.8)	-0.38 (1.06)	-0.27 (0.99)	-0.35 (0.19)	-0.51 (0.13)	-0.38 (0.19)	0.16	0.50177	0.03	0.91473	-0.13	0.57219	0.02	0.8947		0.17 (0.88)	0.16 (0.81)	0.06 (1.15)	-0.11 (0.25)	0.15 (0.11)	0.1 (0.13)	-0.27	0.32217	-0.21
295	C4A	C4A	P0C0L4	310	EMIF-AD MBD	MRM	NA	1	0	1	1			0 (1)	0.02 (0.78)	0.33 (0.87)	0.04 (0.1)	0.01 (0.1)	0.31 (0.07)	0.03	0.85169	-0.27	0.03838	-0.3	0.01647	0.06 (0.61)	-0.08 (0.88)	0.06 (0.96)	0.08 (0.14)	-0.08 (0.17)	0.08 (0.2)	0.15	0.48931	0	0.99889	-0.15	0.56014	-0.03	0.7633		0.21 (0.99)	0.36 (0.88)	0.35 (0.82)	0.21 (0.18)	0.34 (0.1)	0.36 (0.11)	-0.13	0.5345	-0.14
296	C4B	C4B	P0C0L5	310	EMIF-AD MBD	MRM	NA		0	0	0			0 (1)	0 (1.39)	0.15 (1.19)	0.06 (0.14)	0 (0.14)	0.12 (0.1)	0.06	0.77342	-0.06	0.75074	-0.11	0.50558	0.17 (0.76)	-0.3 (1.45)	0.08 (2.17)	0.25 (0.22)	-0.3 (0.26)	0.1 (0.31)	0.55	0.10417	0.14	0.70023	-0.4	0.31253	-0.13	0.5438		0.33 (0.95)	0.01 (1.48)	0.24 (0.85)	0.3 (0.28)	-0.04 (0.16)	0.26 (0.16)	0.35	0.27329	0.04
297	C4BPA	C4BPA	P04003	310	EMIF-AD MBD	MRM	NA		0	0	0			0 (1)	0.03 (0.85)	-0.08 (0.76)	0.03 (0.1)	0.03 (0.1)	-0.09 (0.07)	0	0.9786	0.12	0.35919	0.12	0.3177	-0.04 (0.98)	0.21 (0.76)	-0.09 (0.62)	-0.01 (0.14)	0.21 (0.16)	-0.08 (0.19)	-0.22	0.30441	0.08	0.74592	0.29	0.24409	-0.02	0.8648		-0.02 (0.71)	-0.15 (0.62)	-0.01 (0.91)	-0.03 (0.17)	-0.17 (0.1)	0 (0.1)	0.14	0.48671	-0.03
298	C4BPB	C4BPB	P20851	140	EMIF-AD MBD	MRM	NA		0	0	0			0 (1)	-0.06 (0.96)	-0.19 (0.66)	-0.01 (0.15)	-0.07 (0.14)	-0.19 (0.11)	0.06	0.76285	0.18	0.34984	0.12	0.5054	-0.07 (1.19)	0.01 (0.79)	-0.21 (0.56)	-0.08 (0.19)	0.02 (0.21)	-0.2 (0.32)	-0.1	0.72626	0.13	0.73538	0.23	0.55916	-0.02	0.9346		-0.16 (0.72)	-0.42 (0.62)	0 (0.63)	-0.14 (0.23)	-0.43 (0.16)	0 (0.15)	0.29	0.30302	-0.14
299	C4orf48	C4orf48	Q5BLP8	310	EMIF-AD MBD	MRM	NA		-1	1	1	Decrease	Decrease	0 (1)	-0.34 (0.87)	0.31 (0.88)	0 (0.1)	-0.35 (0.1)	0.31 (0.08)	0.35	0.01613	-0.3	0.02403	-0.65	0	-0.12 (0.7)	-0.4 (0.98)	-0.7 (0.95)	-0.15 (0.15)	-0.39 (0.17)	-0.7 (0.21)	0.25	0.28037	0.55	0.03049	0.3	0.2635	-0.28	0.0269	Decrease linear	0.58 (1.01)	0.36 (0.84)	0.16 (0.86)	0.6 (0.19)	0.36 (0.11)	0.16 (0.11)	0.24	0.25597	0.44
300	C5	C5	P01031	249	ADNI	MRM	1	2	-1	0	1			0 (1)	-0.31 (1.13)	-0.01 (0.9)	-0.04 (0.13)	-0.39 (0.1)	-0.03 (0.09)	0.35	0.03796	-0.01	0.96233	-0.36	0.00796	-0.44 (0.73)	-0.3 (1.22)	-0.2 (1.3)	-0.38 (0.21)	-0.43 (0.14)	-0.32 (0.2)	0.05	0.84647	-0.06	0.82899	-0.11	0.6487	0.07	0.7027		0.4 (0.9)	-0.07 (0.81)	-0.04 (1.03)	0.14 (0.27)	-0.09 (0.12)	0 (0.14)	0.22	0.45453	0.14
301	C5	C5	P01031	310	EMIF-AD MBD	MRM	NA	1	0	0	2			0 (1)	0.24 (0.8)	-0.16 (0.79)	-0.01 (0.1)	0.25 (0.1)	-0.15 (0.07)	-0.26	0.05806	0.14	0.26661	0.4	0.00088	0.04 (0.8)	0.46 (0.82)	0.37 (0.73)	0.04 (0.13)	0.46 (0.16)	0.36 (0.19)	-0.42	0.04739	-0.32	0.17243	0.1	0.68972	0.17	0.1498		-0.26 (1.08)	-0.22 (0.68)	-0.05 (0.79)	-0.27 (0.17)	-0.22 (0.1)	-0.06 (0.1)	-0.05	0.78118	-0.21
302	C6	C6	P13671	249	ADNI	MRM	1	2	0	0	0			0 (0.99)	-0.12 (1.1)	-0.03 (1.03)	-0.03 (0.14)	-0.17 (0.11)	-0.04 (0.09)	0.14	0.43643	0.01	0.97124	-0.13	0.35036	-0.3 (0.91)	-0.14 (1.11)	0.09 (1.25)	-0.27 (0.23)	-0.22 (0.16)	0.02 (0.22)	-0.04	0.87357	-0.29	0.36714	-0.25	0.36475	0.18	0.2951		0.37 (0.92)	-0.06 (0.92)	-0.1 (1.2)	0.17 (0.3)	-0.06 (0.13)	-0.07 (0.16)	0.23	0.48158	0.24
303	C6	C6	P13671	310	EMIF-AD MBD	MRM	NA	1	1	0	2	Increase		0 (1)	0.31 (0.86)	0 (0.85)	0.01 (0.1)	0.31 (0.1)	0 (0.08)	-0.3	0.03856	0.01	0.92526	0.32	0.01355	0.07 (0.83)	0.33 (0.82)	0.79 (0.8)	0.06 (0.14)	0.34 (0.17)	0.8 (0.2)	-0.28	0.21226	-0.74	0.00312	-0.46	0.084	0.35	0.005	Increase linear	-0.1 (1.07)	-0.06 (0.75)	0.09 (0.86)	-0.09 (0.18)	-0.05 (0.1)	0.09 (0.11)	-0.03	0.88255	-0.18
304	C7	C7	P10643	310	EMIF-AD MBD	MRM	NA		0	0	1			0 (1)	-0.05 (1.03)	0.57 (1.07)	0.19 (0.12)	-0.04 (0.11)	0.46 (0.08)	0.23	0.15811	-0.27	0.07742	-0.5	0.00054	-0.2 (0.96)	0 (1.23)	0.2 (0.87)	-0.05 (0.18)	-0.01 (0.21)	0.23 (0.25)	-0.03	0.90196	-0.28	0.36616	-0.24	0.45962	0.11	0.4413		0.44 (1.16)	0.64 (0.99)	0.54 (1.13)	0.37 (0.23)	0.55 (0.13)	0.57 (0.13)	-0.18	0.49064	-0.2
305	C8A	C8A	P07357	310	EMIF-AD MBD	MRM	NA		1	0	2			0 (1)	0.25 (0.77)	-0.1 (0.87)	-0.06 (0.1)	0.26 (0.1)	-0.06 (0.07)	-0.32	0.02599	0	0.99379	0.32	0.01098	0.1 (0.65)	0.29 (0.89)	0.51 (0.8)	0.07 (0.14)	0.29 (0.17)	0.5 (0.2)	-0.23	0.30988	-0.43	0.08055	-0.21	0.43537	0.2	0.0825		-0.22 (0.97)	-0.17 (0.8)	0.03 (0.92)	-0.21 (0.18)	-0.14 (0.1)	0.02 (0.11)	-0.07	0.72453	-0.23
306	C8B	C8B	P07358	249	ADNI	MRM	1	2	0	0	0			0 (0.93)	0.06 (0.68)	0.06 (0.62)	-0.02 (0.1)	0.01 (0.07)	0.05 (0.06)	-0.03	0.78979	-0.07	0.54283	-0.04	0.69751	-0.04 (0.57)	0.03 (0.68)	0.22 (0.77)	-0.01 (0.14)	-0.03 (0.1)	0.16 (0.14)	0.02	0.89822	-0.17	0.37428	-0.19	0.23608	0.1	0.3395		0.22 (0.76)	0.05 (0.57)	0.04 (0.66)	0.08 (0.18)	0.04 (0.08)	0.06 (0.1)	0.05	0.81343	0.02
307	C8B	C8B	P07358	310	EMIF-AD MBD	MRM	NA	1	1	0	2	Increase		0 (1)	0.26 (0.77)	-0.06 (0.88)	-0.06 (0.1)	0.26 (0.1)	-0.03 (0.07)	-0.32	0.02609	-0.03	0.83083	0.29	0.01994	0.06 (0.66)	0.33 (0.94)	0.55 (0.63)	0.03 (0.14)	0.34 (0.17)	0.54 (0.2)	-0.31	0.16905	-0.51	0.04058	-0.2	0.44746	0.23	0.0394	Increase linear	-0.2 (0.94)	-0.08 (0.82)	0 (0.92)	-0.19 (0.18)	-0.05 (0.1)	-0.01 (0.11)	-0.14	0.50442	-0.18
308	C8G	C8G	P07360	310	EMIF-AD MBD	MRM	NA		0	0	2	Increase		0 (1)	0.17 (0.78)	-0.19 (0.9)	-0.06 (0.1)	0.17 (0.1)	-0.16 (0.08)	-0.23	0.11974	0.11	0.42743	0.33	0.00898	-0.1 (0.71)	0.38 (0.85)	0.44 (0.67)	-0.14 (0.15)	0.38 (0.17)	0.42 (0.21)	-0.52	0.02176	-0.56	0.02637	-0.04	0.88708	0.28	0.0124	Increase linear	-0.31 (0.99)	-0.24 (0.79)	-0.1 (0.98)	-0.29 (0.19)	-0.21 (0.11)	-0.11 (0.11)	-0.09	0.68166	-0.18
309	C9	C9	P02748	310	EMIF-AD MBD	MRM	NA		0	0	2			0 (1)	0.34 (1.15)	0.04 (0.96)	0.07 (0.12)	0.35 (0.11)	0 (0.08)	-0.28	0.08729	0.07	0.63117	0.35	0.01383	0.18 (0.89)	0.41 (1.32)	0.57 (1.36)	0.27 (0.17)	0.4 (0.21)	0.58 (0.25)	-0.13	0.62263	-0.31	0.29798	-0.18	0.57705	0.16	0.3439		-0.09 (0.97)	-0.02 (1.03)	0.15 (0.88)	-0.13 (0.22)	-0.07 (0.13)	0.16 (0.13)	-0.07	0.78726	-0.3
310	CA1	CA1	P00915	249	ADNI	MRM	1	2	0	0	0			0 (0.93)	0.03 (0.75)	-0.02 (0.83)	0 (0.12)	0.04 (0.09)	-0.01 (0.08)	-0.04	0.78819	0.01	0.95875	0.05	0.69013	0.01 (0.48)	0.01 (0.89)	0.08 (0.65)	0 (0.18)	0.01 (0.12)	0.09 (0.18)	-0.01	0.97214	-0.08	0.74849	-0.07	0.7305	0.07	0.5661		0.22 (0.62)	-0.06 (0.68)	-0.02 (1.07)	0.19 (0.24)	-0.06 (0.1)	-0.02 (0.13)	0.25	0.33151	0.21
311	CA1	CA1	P00915	278	EMIF-AD MBD	MRM	NA	1	0	0	0		Decrease	0 (1)	0.02 (1.08)	-0.09 (0.9)	0.12 (0.12)	0.02 (0.11)	-0.16 (0.09)	0.1	0.54475	0.29	0.06009	0.19	0.19451	-0.05 (1.05)	0.4 (1.27)	-0.41 (0.57)	0.07 (0.17)	0.41 (0.19)	-0.4 (0.23)	-0.34	0.18714	0.47	0.10037	0.81	0.00762	-0.16	0.3428		0.14 (0.76)	0.06 (1.04)	-0.35 (0.71)	0.09 (0.21)	0 (0.12)	-0.33 (0.13)	0.09	0.7108	0.41
312	CA10	CA10	Q9NS85	202	EMIF-AD MBD	MRM	NA		0	0	1			0 (1)	-0.42 (0.92)	-0.11 (0.95)	-0.08 (0.13)	-0.45 (0.14)	-0.05 (0.1)	0.37	0.05419	-0.02	0.90728	-0.39	0.02322	-0.1 (0.93)	-0.75 (0.76)	-0.66 (0.97)	-0.15 (0.2)	-0.76 (0.23)	-0.73 (0.33)	0.61	0.04407	0.58	0.13234	-0.03	0.93685	-0.34	0.057		0.26 (1.16)	-0.19 (0.91)	-0.17 (0.89)	0.28 (0.23)	-0.15 (0.14)	-0.18 (0.15)	0.44	0.10314	0.46
313	CA11	CA11	O75493	297	EMIF-AD MBD	MRM	NA		0	1	1	Decrease		0 (1)	-0.18 (1.01)	0.12 (0.84)	-0.11 (0.11)	-0.19 (0.11)	0.18 (0.08)	0.09	0.57153	-0.29	0.03439	-0.38	0.00424	0.11 (0.93)	-0.34 (1.02)	-0.58 (1.05)	0 (0.15)	-0.32 (0.19)	-0.6 (0.21)	0.31	0.19714	0.6	0.02129	0.28	0.31712	-0.32	0.0285	Decrease linear	0.39 (0.97)	0.07 (0.81)	0.08 (0.82)	0.43 (0.19)	0.13 (0.11)	0.06 (0.11)	0.3	0.17712	0.37
316	CA2	CA2	P00918	241	EMIF-AD MBD	MRM	NA		0	-1	0			0 (1)	-0.02 (0.93)	-0.25 (0.77)	0.06 (0.12)	-0.03 (0.11)	-0.28 (0.08)	0.09	0.57297	0.34	0.02022	0.25	0.07016	-0.07 (0.74)	0.44 (1.22)	-0.55 (0.38)	-0.04 (0.15)	0.43 (0.18)	-0.53 (0.21)	-0.48	0.04754	0.49	0.06222	0.97	0.0007	-0.15	0.3211		-0.05 (0.5)	-0.15 (0.9)	-0.43 (0.67)	-0.06 (0.19)	-0.18 (0.11)	-0.41 (0.11)	0.12	0.58642	0.35
318	CA4	CA4	P22748	273	EMIF-AD MBD	MRM	NA		0	1	1			0 (1)	-0.15 (0.69)	0.31 (0.82)	0.03 (0.11)	-0.15 (0.11)	0.3 (0.07)	0.18	0.2279	-0.28	0.04188	-0.46	0.00056	-0.1 (0.61)	-0.1 (0.73)	-0.35 (0.83)	-0.1 (0.14)	-0.1 (0.19)	-0.35 (0.22)	0	0.99394	0.25	0.346	0.25	0.3922	-0.1	0.3947		0.55 (0.92)	0.31 (0.82)	0.25 (0.79)	0.55 (0.19)	0.31 (0.1)	0.25 (0.11)	0.24	0.26175	0.3
321	CACHD1	CACHD1	Q5VU97	302	EMIF-AD MBD	MRM	NA		0	0	1			0 (1)	-0.13 (1.01)	0.12 (0.85)	-0.08 (0.11)	-0.14 (0.1)	0.17 (0.08)	0.07	0.66164	-0.24	0.08739	-0.31	0.01879	-0.04 (0.99)	-0.2 (1.02)	-0.24 (1.09)	-0.13 (0.15)	-0.2 (0.18)	-0.26 (0.22)	0.07	0.78412	0.13	0.62141	0.07	0.81786	-0.09	0.56		0.2 (1.02)	0.13 (0.81)	0.08 (0.84)	0.25 (0.2)	0.18 (0.11)	0.07 (0.12)	0.07	0.77757	0.18
322	CACNA2D1	CACNA2D1	P54289	249	ADNI	MRM	1	2	-1	1	1	Decrease	Decrease	0 (0.96)	-1 (1.34)	0.48 (1.28)	-0.03 (0.17)	-1.02 (0.13)	0.48 (0.11)	1	1e-05	-0.51	0.01392	-1.51	0	-0.56 (1.33)	-0.95 (1.31)	-1.52 (1.28)	-0.54 (0.27)	-1.01 (0.19)	-1.56 (0.27)	0.47	0.16243	1.02	0.00829	0.56	0.08683	-0.48	0.0195	Decrease linear	1.08 (0.73)	0.72 (1.15)	-0.08 (1.41)	0.89 (0.35)	0.75 (0.15)	-0.06 (0.19)	0.14	0.7214	0.94
323	CACNA2D1	CACNA2D1	P54289	310	EMIF-AD MBD	MRM	NA	1	-1	1	1	Decrease	Decrease	0 (1)	-0.59 (0.88)	0.3 (0.83)	0 (0.1)	-0.6 (0.1)	0.3 (0.07)	0.6	3e-05	-0.3	0.02468	-0.9	0	-0.33 (0.81)	-0.62 (0.86)	-1.09 (0.86)	-0.35 (0.14)	-0.61 (0.17)	-1.09 (0.2)	0.27	0.21931	0.74	0.00246	0.47	0.06996	-0.35	0.0052	Decrease linear	0.6 (0.96)	0.41 (0.74)	0.08 (0.84)	0.61 (0.18)	0.41 (0.1)	0.08 (0.1)	0.2	0.31708	0.53
324	CACNA2D2	CACNA2D2	Q9NY47	310	EMIF-AD MBD	MRM	NA		-1	1	1	Decrease		0 (1)	-0.46 (0.94)	0.14 (0.71)	-0.08 (0.1)	-0.47 (0.1)	0.19 (0.07)	0.39	0.0042	-0.27	0.03218	-0.66	0	-0.26 (0.92)	-0.46 (0.81)	-0.91 (1.04)	-0.35 (0.13)	-0.45 (0.16)	-0.93 (0.19)	0.1	0.62439	0.58	0.01163	0.48	0.05119	-0.29	0.0297	Decrease linear	0.28 (0.9)	0.17 (0.65)	0.07 (0.7)	0.32 (0.17)	0.22 (0.09)	0.05 (0.1)	0.1	0.60604	0.27
325	CACNA2D3	CACNA2D3	Q8IZS8	310	EMIF-AD MBD	MRM	NA		-1	1	1	Decrease	Decrease	0 (1)	-0.46 (0.86)	0.35 (0.95)	0.03 (0.11)	-0.47 (0.1)	0.33 (0.08)	0.51	0.00085	-0.3	0.03236	-0.8	0	-0.26 (0.84)	-0.44 (0.74)	-0.91 (0.94)	-0.26 (0.15)	-0.44 (0.18)	-0.89 (0.22)	0.18	0.43909	0.63	0.01768	0.45	0.11615	-0.31	0.014	Decrease linear	0.7 (1.06)	0.38 (0.88)	0.18 (0.95)	0.71 (0.2)	0.36 (0.11)	0.19 (0.11)	0.35	0.12158	0.52
326	CADM1	CADM1	Q9BY67	310	EMIF-AD MBD	MRM	NA		-1	0	1	Decrease		0 (1)	-0.43 (0.83)	0.22 (0.7)	0 (0.1)	-0.44 (0.09)	0.22 (0.07)	0.44	0.00115	-0.22	0.06967	-0.66	0	-0.21 (0.7)	-0.53 (0.82)	-0.77 (0.98)	-0.23 (0.13)	-0.53 (0.15)	-0.77 (0.18)	0.3	0.13707	0.54	0.01546	0.24	0.30822	-0.27	0.0239	Decrease linear	0.19 (0.77)	0.26 (0.68)	0.18 (0.72)	0.2 (0.16)	0.27 (0.09)	0.18 (0.09)	-0.07	0.72313	0.03
327	CADM2	CADM2	Q8N3J6	310	EMIF-AD MBD	MRM	NA		-1	1	1	Decrease		0 (1)	-0.5 (0.87)	0.34 (0.78)	0.01 (0.1)	-0.51 (0.1)	0.34 (0.07)	0.52	0.00024	-0.33	0.00974	-0.85	0	-0.31 (0.75)	-0.53 (0.79)	-0.86 (1.14)	-0.35 (0.14)	-0.53 (0.16)	-0.86 (0.19)	0.18	0.39031	0.51	0.03156	0.33	0.19697	-0.25	0.0491	Decrease linear	0.48 (0.86)	0.4 (0.72)	0.22 (0.82)	0.51 (0.17)	0.41 (0.1)	0.22 (0.1)	0.1	0.60642	0.29
328	CADM3	CADM3	Q8N126	249	ADNI	MRM	1	2	-1	1	1			0 (0.93)	-0.89 (1.17)	0.43 (1.09)	-0.04 (0.14)	-0.96 (0.11)	0.42 (0.09)	0.92	0	-0.46	0.00831	-1.38	0	-0.78 (1.31)	-0.8 (1.12)	-1.18 (1.15)	-0.73 (0.23)	-0.93 (0.16)	-1.3 (0.22)	0.2	0.46857	0.57	0.07881	0.37	0.179	-0.26	0.1503		0.87 (0.73)	0.54 (0.95)	0.12 (1.29)	0.58 (0.3)	0.54 (0.13)	0.16 (0.16)	0.04	0.90556	0.42
329	CADM3	CADM3	Q8N126	310	EMIF-AD MBD	MRM	NA	1	-1	1	1	Decrease		0 (1)	-0.51 (0.88)	0.3 (0.71)	-0.02 (0.1)	-0.51 (0.09)	0.32 (0.07)	0.49	0.00033	-0.34	0.00702	-0.83	0	-0.29 (0.78)	-0.59 (0.79)	-0.86 (1.08)	-0.32 (0.13)	-0.58 (0.16)	-0.87 (0.18)	0.26	0.19909	0.55	0.01582	0.29	0.23735	-0.28	0.0274	Decrease linear	0.36 (0.77)	0.38 (0.68)	0.21 (0.72)	0.38 (0.17)	0.4 (0.09)	0.2 (0.1)	-0.02	0.91093	0.17
330	CADM4	CADM4	Q8NFZ8	310	EMIF-AD MBD	MRM	NA		-1	0	1	Decrease		0 (1)	-0.36 (0.94)	0.2 (0.76)	-0.01 (0.1)	-0.37 (0.1)	0.21 (0.07)	0.36	0.01255	-0.22	0.08687	-0.58	0	-0.13 (0.91)	-0.5 (0.89)	-0.67 (1)	-0.17 (0.14)	-0.49 (0.17)	-0.68 (0.2)	0.33	0.13555	0.51	0.03659	0.18	0.48353	-0.27	0.0477	Decrease linear	0.25 (0.9)	0.25 (0.68)	0.14 (0.79)	0.27 (0.18)	0.27 (0.1)	0.13 (0.1)	0	0.99996	0.14
331	CALB1	CALB1	P05937	310	EMIF-AD MBD	MRM	NA		0	1	1			0 (1)	-0.21 (0.97)	0.29 (0.74)	0 (0.1)	-0.22 (0.1)	0.3 (0.07)	0.21	0.13063	-0.3	0.02018	-0.52	3e-05	-0.11 (0.94)	-0.13 (1.02)	-0.52 (0.92)	-0.18 (0.14)	-0.13 (0.17)	-0.52 (0.2)	-0.05	0.81137	0.34	0.1548	0.39	0.12691	-0.16	0.2584		0.21 (0.68)	0.4 (0.73)	0.21 (0.77)	0.24 (0.18)	0.43 (0.1)	0.2 (0.1)	-0.18	0.36641	0.04
332	CALB2	CALB2	P22676	121	EMIF-AD MBD	MRM	NA		0	1	1			0 (1)	-0.09 (0.92)	0.58 (0.73)	0.1 (0.17)	-0.1 (0.15)	0.55 (0.11)	0.2	0.38249	-0.45	0.03581	-0.65	0.00082	-0.25 (1.01)	0.07 (0.92)	-0.05 (0.78)	-0.26 (0.23)	0.07 (0.25)	-0.06 (0.34)	-0.33	0.33326	-0.2	0.6203	0.13	0.75368	0.15	0.4956		0.44 (0.52)	0.68 (0.64)	0.53 (0.88)	0.45 (0.27)	0.68 (0.16)	0.54 (0.16)	-0.22	0.48423	-0.09
333	CALCA	CALCA	P01258	270	ADNI	RBM	0	2	0	0	0			0 (1)	-0.01 (1.19)	0.24 (1.1)	0 (0.15)	0.03 (0.12)	0.26 (0.1)	-0.03	0.88773	-0.25	0.16527	-0.23	0.138	0 (1.29)	-0.05 (1.15)	0.09 (1.23)	-0.03 (0.24)	0.02 (0.17)	0.16 (0.24)	-0.05	0.86639	-0.19	0.57327	-0.14	0.61735	0.07	0.6876		0.17 (1.11)	0.2 (1.14)	0.35 (1.04)	0.25 (0.33)	0.22 (0.14)	0.33 (0.18)	0.03	0.937	-0.08
334	CALCA	CALCA	P01258	95	EMIF-AD MBD	MRM	NA	1	0	0	0			0 (1)	0.38 (1.23)	0.16 (0.95)	-0.07 (0.23)	0.36 (0.2)	0.22 (0.18)	-0.43	0.15276	-0.29	0.3432	0.14	0.62419	0.4 (0.96)	0.35 (1.64)	0.4 (0.76)	0.34 (0.35)	0.33 (0.32)	0.33 (0.5)	0	0.99383	0.01	0.99018	0	0.99494	-0.02	0.9643		-0.21 (0.91)	-0.01 (0.83)	0.44 (1.03)	-0.11 (0.47)	0.01 (0.27)	0.45 (0.25)	-0.11	0.83058	-0.56
336	CALM1	CALM1	P0DP23	310	EMIF-AD MBD	MRM	NA		0	1	1			0 (1)	-0.2 (0.85)	0.64 (1.03)	0.02 (0.11)	-0.2 (0.11)	0.63 (0.08)	0.22	0.16055	-0.61	4e-05	-0.84	0	-0.17 (0.81)	-0.19 (0.73)	-0.27 (1.11)	-0.16 (0.17)	-0.19 (0.2)	-0.25 (0.24)	0.03	0.90342	0.1	0.7375	0.07	0.83323	-0.04	0.7605		0.38 (1.21)	0.66 (1)	0.72 (0.99)	0.38 (0.21)	0.64 (0.12)	0.73 (0.12)	-0.26	0.28986	-0.35
338	CALML5	CALML5	Q9NZT1	156	EMIF-AD MBD	MRM	NA		0	0	0			0 (1)	0.03 (0.82)	-0.13 (1.11)	0.01 (0.16)	0.03 (0.18)	-0.13 (0.12)	-0.01	0.95206	0.15	0.47672	0.16	0.45538	0.13 (0.83)	0.21 (0.65)	-0.43 (0.88)	0.15 (0.25)	0.23 (0.39)	-0.44 (0.39)	-0.08	0.86126	0.59	0.20702	0.67	0.22889	-0.23	0.2274		0.27 (1.22)	-0.03 (1.13)	-0.4 (1.03)	0.27 (0.31)	-0.05 (0.17)	-0.39 (0.2)	0.32	0.36868	0.66
339	CALR	CALR	P27797	310	EMIF-AD MBD	MRM	NA		-1	1	1	Decrease		0 (1)	-0.37 (0.9)	0.36 (0.72)	0.02 (0.1)	-0.38 (0.1)	0.36 (0.07)	0.4	0.004	-0.33	0.00836	-0.73	0	-0.18 (0.88)	-0.43 (0.82)	-0.7 (1)	-0.19 (0.13)	-0.42 (0.16)	-0.7 (0.19)	0.23	0.26059	0.51	0.02915	0.27	0.27276	-0.25	0.0564	Decrease non-linear	0.51 (0.8)	0.44 (0.68)	0.23 (0.72)	0.52 (0.17)	0.44 (0.1)	0.23 (0.1)	0.08	0.66405	0.29
340	CALU	CALU	O43852	96	EMIF-AD MBD	MRM	NA		0	0	0			0 (1)	-0.01 (0.85)	-0.13 (0.79)	0.06 (0.19)	0.03 (0.18)	-0.18 (0.13)	0.03	0.89993	0.23	0.33092	0.2	0.38418	0.16 (0.47)	-0.09 (1.39)	-0.27 (0.86)	0.16 (0.26)	-0.08 (0.34)	-0.24 (0.34)	0.23	0.57954	0.4	0.35471	0.17	0.72778	-0.07	0.7596		-0.1 (1.25)	-0.01 (0.58)	-0.27 (0.87)	-0.05 (0.4)	-0.03 (0.18)	-0.27 (0.18)	-0.02	0.96069	0.22
341	CALY	CALY	Q9NYX4	142	EMIF-AD MBD	MRM	NA		-1	0	1			0 (1)	-0.5 (0.98)	0.34 (0.92)	0.1 (0.18)	-0.54 (0.16)	0.32 (0.11)	0.65	0.01051	-0.22	0.33407	-0.86	2e-05	-0.18 (0.83)	-0.62 (0.94)	-1.05 (1.35)	-0.22 (0.25)	-0.61 (0.24)	-1.05 (0.4)	0.38	0.27089	0.83	0.08275	0.44	0.34936	-0.45	0.0784		0.42 (0.84)	0.64 (0.78)	0.02 (0.99)	0.49 (0.31)	0.6 (0.16)	0.06 (0.16)	-0.11	0.74287	0.43
342	CAMK2A	CAMK2A	Q9UQM7	310	EMIF-AD MBD	MRM	NA		0	1	1			0 (1)	-0.17 (1.09)	0.76 (0.91)	-0.08 (0.11)	-0.18 (0.11)	0.81 (0.08)	0.11	0.48274	-0.88	0	-0.99	0	-0.01 (0.82)	-0.12 (1.03)	-0.57 (1.55)	-0.12 (0.16)	-0.12 (0.19)	-0.59 (0.23)	0	0.99419	0.47	0.09594	0.47	0.11895	-0.24	0.1397		0.79 (1.03)	0.73 (0.8)	0.78 (0.98)	0.85 (0.21)	0.78 (0.12)	0.76 (0.12)	0.07	0.77949	0.08
343	CAMK2B	CAMK2B	Q13554	198	EMIF-AD MBD	MRM	NA		0	1	1		Decrease	0 (1)	-0.13 (0.76)	0.34 (0.79)	-0.01 (0.12)	-0.14 (0.13)	0.35 (0.09)	0.13	0.47069	-0.36	0.02254	-0.49	0.0017	0.07 (0.53)	-0.26 (0.73)	-0.29 (1.11)	0.02 (0.19)	-0.25 (0.18)	-0.33 (0.26)	0.27	0.29311	0.35	0.27377	0.07	0.81515	-0.23	0.147		0.65 (0.82)	0.32 (0.68)	0.26 (0.89)	0.7 (0.21)	0.33 (0.12)	0.26 (0.12)	0.37	0.11897	0.44
344	CAMK2D	CAMK2D	Q13557	217	EMIF-AD MBD	MRM	NA		0	1	1	Decrease		0 (1)	-0.17 (0.92)	0.56 (0.75)	-0.03 (0.12)	-0.18 (0.12)	0.58 (0.08)	0.15	0.38256	-0.62	8e-05	-0.77	0	0 (0.89)	-0.07 (0.79)	-0.71 (1.07)	-0.08 (0.17)	-0.06 (0.19)	-0.7 (0.24)	-0.02	0.94188	0.62	0.03576	0.64	0.03963	-0.26	0.1163	Decrease non-linear	0.64 (0.88)	0.5 (0.73)	0.6 (0.75)	0.69 (0.22)	0.53 (0.11)	0.6 (0.11)	0.16	0.51009	0.09
347	CANT1	CANT1	Q8WVQ1	310	EMIF-AD MBD	MRM	NA		-1	1	1	Decrease	Decrease	0 (1)	-0.35 (0.93)	0.3 (0.77)	-0.02 (0.1)	-0.36 (0.1)	0.32 (0.07)	0.34	0.01609	-0.34	0.00854	-0.68	0	-0.15 (0.8)	-0.36 (0.96)	-0.76 (1.06)	-0.2 (0.14)	-0.36 (0.16)	-0.76 (0.2)	0.16	0.47072	0.56	0.0199	0.4	0.11563	-0.28	0.0441	Decrease linear	0.51 (0.92)	0.35 (0.68)	0.17 (0.79)	0.54 (0.18)	0.37 (0.1)	0.16 (0.1)	0.17	0.40221	0.38
348	CANX	CANX	P27824	310	EMIF-AD MBD	MRM	NA		0	1	1	Decrease		0 (1)	-0.21 (0.78)	0.34 (0.65)	-0.02 (0.09)	-0.22 (0.09)	0.35 (0.07)	0.2	0.12287	-0.37	0.0019	-0.57	0	0.01 (0.75)	-0.33 (0.71)	-0.51 (0.85)	-0.02 (0.12)	-0.32 (0.14)	-0.52 (0.17)	0.31	0.09569	0.5	0.01504	0.19	0.38052	-0.27	0.017	Decrease linear	0.28 (0.81)	0.44 (0.69)	0.25 (0.54)	0.3 (0.15)	0.45 (0.09)	0.25 (0.09)	-0.16	0.36669	0.05
350	CAPG	CAPG	P40121	195	EMIF-AD MBD	MRM	NA		0	0	0			0 (1)	0.15 (0.81)	0.1 (1.3)	0.22 (0.17)	0.17 (0.16)	-0.02 (0.12)	0.04	0.85372	0.24	0.27317	0.2	0.31998	0.08 (0.94)	0.23 (0.73)	0.21 (0.65)	0.3 (0.24)	0.17 (0.28)	0.34 (0.38)	0.12	0.74209	-0.04	0.92705	-0.17	0.72986	0.05	0.7448		-0.26 (1.62)	0.21 (1.18)	0.12 (1.29)	-0.36 (0.3)	0.12 (0.17)	0.12 (0.19)	-0.48	0.16271	-0.48
354	CARTPT	CARTPT	Q16568	310	EMIF-AD MBD	MRM	NA		-1	0	1		Decrease	0 (1)	-0.3 (0.68)	0.2 (0.8)	0.02 (0.1)	-0.3 (0.09)	0.19 (0.07)	0.32	0.01845	-0.17	0.18638	-0.49	5e-05	-0.18 (0.71)	-0.31 (0.64)	-0.55 (0.63)	-0.17 (0.13)	-0.31 (0.15)	-0.55 (0.18)	0.14	0.49037	0.37	0.09516	0.23	0.32713	-0.17	0.0957		0.36 (0.82)	0.33 (0.7)	-0.01 (0.86)	0.36 (0.16)	0.33 (0.09)	-0.01 (0.1)	0.03	0.85331	0.37
355	CASC4	CASC4	Q6P4E1	310	EMIF-AD MBD	MRM	NA		-1	1	1			0 (1)	-0.49 (0.8)	0.33 (0.82)	0.04 (0.1)	-0.49 (0.1)	0.31 (0.07)	0.53	0.0002	-0.28	0.03301	-0.8	0	-0.37 (0.77)	-0.44 (0.75)	-0.8 (0.89)	-0.37 (0.14)	-0.44 (0.17)	-0.79 (0.2)	0.07	0.7572	0.42	0.08012	0.35	0.16923	-0.2	0.0846		0.36 (0.99)	0.46 (0.76)	0.18 (0.81)	0.36 (0.18)	0.45 (0.1)	0.18 (0.1)	-0.09	0.65961	0.18
358	CAT	CAT	P04040	249	ADNI	MRM	0	2	0	0	0			0 (1)	-0.36 (1.53)	-0.11 (1.08)	0 (0.18)	-0.35 (0.14)	-0.1 (0.12)	0.36	0.12325	0.1	0.62796	-0.24	0.17352	-0.24 (0.57)	-0.43 (2.05)	-0.33 (0.77)	-0.25 (0.29)	-0.42 (0.2)	-0.32 (0.29)	0.17	0.62801	0.07	0.85853	-0.1	0.77366	-0.03	0.8982		0.16 (1)	-0.29 (1.2)	0.07 (0.88)	0.15 (0.38)	-0.27 (0.16)	0.07 (0.2)	0.42	0.31279	0.08
359	CAT	CAT	P04040	119	EMIF-AD MBD	MRM	NA	1	0	-1	2			0 (1)	0.07 (0.85)	-0.35 (0.54)	0.07 (0.14)	0.08 (0.15)	-0.4 (0.11)	-0.02	0.93909	0.47	0.01503	0.48	0.01013	0.01 (0.69)	0.49 (1.09)	-0.5 (0.35)	0.11 (0.18)	0.51 (0.21)	-0.44 (0.28)	-0.4	0.1422	0.56	0.09438	0.96	0.00801	-0.17	0.4469		-0.44 (0.3)	-0.24 (0.74)	-0.44 (0.3)	-0.47 (0.18)	-0.3 (0.13)	-0.45 (0.14)	-0.18	0.41076	-0.03
361	CBLN1	CBLN1	P23435	310	EMIF-AD MBD	MRM	NA		0	1	1			0 (1)	-0.3 (0.98)	0.11 (0.82)	-0.1 (0.1)	-0.31 (0.1)	0.17 (0.08)	0.21	0.14874	-0.27	0.04568	-0.48	0.00019	-0.01 (0.76)	-0.55 (0.91)	-0.56 (1.31)	-0.12 (0.14)	-0.54 (0.17)	-0.58 (0.21)	0.42	0.06333	0.46	0.07017	0.03	0.89831	-0.27	0.0551		0.18 (0.85)	0.08 (0.82)	0.11 (0.81)	0.23 (0.19)	0.15 (0.1)	0.09 (0.11)	0.08	0.69871	0.14
362	CBLN2	CBLN2	Q8IUK8	249	EMIF-AD MBD	MRM	NA		-1	0	1			0 (1)	-0.47 (0.96)	0.28 (1.01)	0 (0.13)	-0.48 (0.13)	0.28 (0.09)	0.48	0.00796	-0.28	0.10184	-0.76	0	-0.19 (0.78)	-0.73 (1.23)	-0.7 (0.67)	-0.22 (0.19)	-0.74 (0.22)	-0.7 (0.29)	0.52	0.07916	0.48	0.16501	-0.04	0.92037	-0.27	0.104		0.59 (1.18)	0.26 (0.95)	0.19 (1.03)	0.59 (0.26)	0.28 (0.14)	0.2 (0.14)	0.31	0.28162	0.4
363	CBLN3	CBLN3	Q6UW01	310	EMIF-AD MBD	MRM	NA		0	0	1	Decrease		0 (1)	-0.37 (0.99)	0.06 (0.85)	-0.12 (0.11)	-0.38 (0.1)	0.13 (0.08)	0.26	0.07601	-0.24	0.07678	-0.51	0.00011	-0.06 (0.84)	-0.62 (0.9)	-0.67 (1.24)	-0.18 (0.15)	-0.61 (0.18)	-0.7 (0.21)	0.42	0.0695	0.52	0.04614	0.09	0.73671	-0.3	0.0358	Decrease linear	0.13 (0.96)	0.04 (0.83)	0.05 (0.85)	0.18 (0.19)	0.12 (0.11)	0.03 (0.11)	0.06	0.79014	0.15
364	CBLN4	CBLN4	Q9NTU7	310	EMIF-AD MBD	MRM	NA		-1	0	1	Decrease	Decrease	0 (1)	-0.75 (1.05)	0.18 (0.95)	-0.02 (0.11)	-0.76 (0.11)	0.2 (0.08)	0.73	1e-05	-0.22	0.12375	-0.96	0	-0.45 (0.85)	-0.79 (0.97)	-1.3 (1.32)	-0.52 (0.16)	-0.79 (0.19)	-1.31 (0.23)	0.27	0.28715	0.79	0.00527	0.52	0.08487	-0.4	0.0084	Decrease linear	0.54 (1.12)	0.27 (0.86)	-0.04 (0.95)	0.58 (0.21)	0.3 (0.12)	-0.05 (0.12)	0.28	0.23573	0.63
365	CBR1	CBR1	P16152	278	EMIF-AD MBD	MRM	NA		0	0	0			0 (1)	0.08 (0.78)	0.21 (0.89)	0.07 (0.11)	0.08 (0.11)	0.18 (0.08)	-0.01	0.94976	-0.11	0.43312	-0.1	0.44063	0.07 (0.77)	0.04 (0.85)	0.17 (0.7)	0.06 (0.16)	0.04 (0.18)	0.17 (0.22)	0.02	0.93894	-0.1	0.69764	-0.12	0.66867	0.06	0.6214		0.13 (1.05)	0.23 (0.88)	0.21 (0.86)	0.15 (0.2)	0.21 (0.11)	0.22 (0.11)	-0.06	0.77792	-0.07
366	CBR3	CBR3	O75828	260	EMIF-AD MBD	MRM	NA		0	0	0			0 (1)	-0.07 (0.9)	-0.07 (0.82)	0.06 (0.12)	-0.07 (0.11)	-0.09 (0.08)	0.13	0.4394	0.15	0.30753	0.03	0.85381	-0.24 (0.88)	0.11 (1.02)	0.08 (0.73)	-0.24 (0.16)	0.12 (0.19)	0.07 (0.24)	-0.36	0.15151	-0.31	0.2764	0.05	0.87616	0.2	0.1705		-0.15 (0.97)	-0.04 (0.82)	-0.07 (0.79)	-0.15 (0.2)	-0.04 (0.11)	-0.07 (0.12)	-0.1	0.64569	-0.08
367	CCDC126	CCDC126	Q96EE4	265	EMIF-AD MBD	MRM	NA		-1	1	1			0 (1)	-0.48 (0.93)	0.34 (0.82)	0 (0.11)	-0.49 (0.11)	0.34 (0.08)	0.49	0.00241	-0.34	0.02097	-0.83	0	-0.39 (0.85)	-0.4 (0.9)	-0.9 (1.13)	-0.39 (0.16)	-0.4 (0.18)	-0.9 (0.25)	0.01	0.95609	0.51	0.08472	0.5	0.10603	-0.22	0.1545		0.32 (0.6)	0.4 (0.87)	0.27 (0.84)	0.32 (0.2)	0.41 (0.12)	0.27 (0.12)	-0.09	0.68938	0.05
368	CCDC40	CCDC40	Q4G0X9	125	EMIF-AD MBD	MRM	NA		0	0	0			0 (1)	-0.14 (0.99)	0.18 (1.68)	0.07 (0.26)	-0.15 (0.21)	0.16 (0.19)	0.22	0.51822	-0.09	0.79448	-0.31	0.2919	-0.04 (0.99)	-0.31 (0.73)	-0.15 (1.42)	-0.04 (0.34)	-0.35 (0.43)	-0.08 (0.56)	0.31	0.5798	0.04	0.95405	-0.27	0.71014	-0.2	0.3684		0.63 (0.67)	0.15 (2.35)	-0.02 (0.89)	0.63 (0.44)	0.14 (0.3)	-0.01 (0.33)	0.49	0.36067	0.64
370	CCER2	CCER2	I3L3R5	254	EMIF-AD MBD	MRM	NA		0	0	1			0 (1)	-0.33 (1.05)	0.16 (1.08)	0 (0.14)	-0.33 (0.13)	0.16 (0.1)	0.33	0.08727	-0.15	0.38423	-0.48	0.00342	-0.34 (0.98)	-0.28 (1.1)	-0.37 (1.18)	-0.37 (0.21)	-0.28 (0.23)	-0.39 (0.3)	-0.09	0.77178	0.02	0.96463	0.11	0.77939	0	0.9886		0.4 (1)	0.19 (1.19)	0.02 (0.98)	0.41 (0.24)	0.21 (0.14)	0.01 (0.15)	0.2	0.47435	0.4
371	CCK	CCK	P06307	249	ADNI	MRM	1	2	-1	1	1	Decrease	Decrease	0 (0.94)	-0.68 (1.08)	0.42 (0.97)	-0.02 (0.14)	-0.68 (0.11)	0.44 (0.09)	0.66	0.00023	-0.45	0.00725	-1.12	0	-0.27 (0.97)	-0.6 (1.01)	-1.22 (1.15)	-0.27 (0.21)	-0.61 (0.15)	-1.21 (0.21)	0.33	0.2025	0.93	0.00212	0.6	0.01832	-0.46	0.0055	Decrease linear	0.74 (0.85)	0.66 (0.89)	-0.03 (0.98)	0.64 (0.28)	0.69 (0.12)	-0.02 (0.15)	-0.05	0.8711	0.66
372	CCK	CCK	P06307	305	EMIF-AD MBD	MRM	NA	1	-1	0	1			0 (1)	-0.52 (0.96)	0.22 (1.05)	0.02 (0.12)	-0.52 (0.12)	0.21 (0.09)	0.54	0.00129	-0.19	0.21867	-0.73	0	-0.33 (0.91)	-0.61 (0.79)	-0.79 (1.21)	-0.33 (0.18)	-0.61 (0.21)	-0.78 (0.25)	0.28	0.3085	0.46	0.13278	0.17	0.59492	-0.26	0.0732		0.16 (1.02)	0.31 (1.06)	0.13 (1.05)	0.17 (0.22)	0.31 (0.13)	0.13 (0.13)	-0.14	0.57854	0.04
373	CCL1	CCL1	P22362	270	ADNI	RBM	0		0	1	0			0 (1)	0.29 (0.94)	0.37 (1.09)	-0.01 (0.14)	0.33 (0.11)	0.4 (0.09)	-0.34	0.05489	-0.4	0.01654	-0.06	0.64352	0.05 (1.11)	0.47 (0.89)	0.13 (0.8)	0.01 (0.22)	0.55 (0.15)	0.23 (0.21)	-0.55	0.03948	-0.22	0.47567	0.33	0.20037	0.09	0.5393		0.53 (0.77)	0.37 (1.03)	0.33 (1.26)	0.57 (0.3)	0.42 (0.12)	0.32 (0.16)	0.15	0.64465	0.25
375	CCL14	CCL14	Q16627	310	EMIF-AD MBD	MRM	NA		0	0	0			0 (1)	0.14 (1.1)	0.07 (1.03)	0.12 (0.12)	0.15 (0.12)	0 (0.09)	-0.03	0.87978	0.12	0.43321	0.15	0.31683	0.06 (1.19)	0.13 (1.08)	0.33 (0.95)	0.15 (0.18)	0.12 (0.21)	0.35 (0.25)	0.03	0.90649	-0.19	0.5343	-0.23	0.49767	0.1	0.5333		0 (0.81)	0.04 (1.08)	0.13 (1.05)	-0.04 (0.23)	-0.02 (0.13)	0.15 (0.13)	-0.02	0.95394	-0.19
376	CCL16	CCL16	O15467	270	ADNI	RBM	0		0	0	0			0 (1)	0.11 (0.84)	0.01 (0.78)	-0.01 (0.11)	0.05 (0.09)	0 (0.07)	-0.06	0.65013	-0.01	0.93674	0.05	0.63468	0.09 (0.69)	0.14 (0.93)	0.08 (0.8)	0.13 (0.16)	0.03 (0.11)	-0.02 (0.16)	0.1	0.62035	0.15	0.52187	0.05	0.79917	-0.08	0.5207		0.28 (0.54)	0.07 (0.82)	-0.16 (0.74)	0.09 (0.22)	0.05 (0.09)	-0.13 (0.12)	0.04	0.87498	0.22
377	CCL2	CCL2	P13500	270	ADNI	RBM	0		0	0	1			0 (1)	-0.14 (1)	0.12 (1.12)	-0.02 (0.13)	-0.26 (0.1)	0.08 (0.09)	0.24	0.15495	-0.1	0.5527	-0.34	0.01287	-0.2 (0.91)	-0.08 (1)	-0.21 (1.12)	-0.12 (0.21)	-0.31 (0.14)	-0.43 (0.21)	0.19	0.45097	0.31	0.28611	0.12	0.61852	-0.17	0.2192		0.27 (0.98)	0.11 (1.18)	0.08 (1.08)	-0.03 (0.28)	0.04 (0.12)	0.13 (0.15)	-0.06	0.83284	-0.16
379	CCL4	CCL4	P13236	270	ADNI	RBM	0		0	0	0			0 (1)	-0.14 (0.95)	-0.07 (0.81)	-0.01 (0.12)	-0.17 (0.09)	-0.08 (0.08)	0.16	0.3011	0.07	0.6458	-0.09	0.45296	-0.33 (0.95)	-0.04 (1.05)	-0.16 (0.72)	-0.31 (0.18)	-0.1 (0.13)	-0.22 (0.18)	-0.21	0.35632	-0.09	0.73799	0.12	0.58033	0.02	0.8626		0.18 (0.81)	-0.09 (0.87)	-0.1 (0.7)	0.07 (0.25)	-0.11 (0.11)	-0.08 (0.13)	0.18	0.51199	0.15
380	CCL5	CCL5	P13501	270	ADNI	RBM	0		0	0	0			0 (1)	-0.19 (0.91)	-0.25 (0.6)	0 (0.11)	-0.2 (0.08)	-0.25 (0.07)	0.19	0.16538	0.25	0.06192	0.05	0.62068	-0.23 (1.21)	-0.08 (0.92)	-0.4 (0.36)	-0.22 (0.16)	-0.1 (0.11)	-0.43 (0.16)	-0.11	0.56338	0.21	0.34659	0.32	0.08605	-0.11	0.4565		0.09 (0.85)	-0.35 (0.48)	-0.18 (0.67)	0.04 (0.22)	-0.36 (0.09)	-0.18 (0.11)	0.41	0.08541	0.22
381	CCL8	CCL8	P80075	270	ADNI	RBM	0		0	0	0			0 (1)	-0.22 (1.19)	-0.12 (0.85)	-0.01 (0.14)	-0.24 (0.11)	-0.12 (0.09)	0.23	0.19214	0.11	0.48974	-0.11	0.41538	0.01 (0.87)	-0.22 (1.35)	-0.43 (1.09)	0.01 (0.22)	-0.23 (0.15)	-0.44 (0.21)	0.24	0.36741	0.45	0.14663	0.21	0.41942	-0.2	0.2679		0.21 (0.94)	-0.14 (0.86)	-0.19 (0.82)	0.18 (0.3)	-0.13 (0.12)	-0.18 (0.16)	0.31	0.33	0.36
383	CCSMST1	CCSMST1	Q4G0I0	255	EMIF-AD MBD	MRM	NA		-1	0	1			0 (1)	-0.6 (0.96)	0.1 (0.83)	-0.02 (0.12)	-0.62 (0.11)	0.12 (0.08)	0.6	0.00026	-0.14	0.34345	-0.74	0	-0.37 (0.93)	-0.66 (0.84)	-0.98 (1.12)	-0.48 (0.16)	-0.65 (0.18)	-0.98 (0.24)	0.18	0.47194	0.51	0.07709	0.33	0.2652	-0.25	0.112		0.25 (0.8)	0.16 (0.84)	0 (0.84)	0.31 (0.21)	0.2 (0.11)	0 (0.11)	0.11	0.6524	0.31
385	CD109	CD109	Q6YHK3	310	EMIF-AD MBD	MRM	NA		0	0	1			0 (1)	-0.02 (1.03)	0.28 (1.01)	0.04 (0.12)	-0.03 (0.11)	0.27 (0.08)	0.06	0.7072	-0.23	0.12844	-0.29	0.04204	-0.04 (1.05)	-0.14 (1.13)	0.18 (0.86)	-0.06 (0.17)	-0.13 (0.21)	0.19 (0.25)	0.07	0.79608	-0.26	0.39511	-0.33	0.31261	0.1	0.5059		0.21 (1.1)	0.27 (1.03)	0.33 (0.97)	0.23 (0.22)	0.27 (0.13)	0.33 (0.13)	-0.03	0.89388	-0.1
386	CD14	CD14	P08571	249	ADNI	MRM	1	2	-1	1	1			0 (0.95)	-0.59 (1.39)	0.44 (1.33)	-0.07 (0.15)	-0.68 (0.12)	0.44 (0.1)	0.61	0.00154	-0.5	0.00587	-1.12	0	-0.32 (1.12)	-0.69 (1.52)	-0.62 (1.37)	-0.27 (0.25)	-0.86 (0.17)	-0.76 (0.25)	0.59	0.05537	0.49	0.16785	-0.1	0.73232	-0.19	0.3144		0.79 (1.45)	0.55 (1.28)	0.15 (1.36)	0.32 (0.33)	0.58 (0.14)	0.22 (0.17)	-0.26	0.46709	0.11
387	CD14	CD14	P08571	310	EMIF-AD MBD	MRM	NA	1	-1	1	1			0 (1)	-0.12 (0.87)	0.63 (0.8)	0.18 (0.1)	-0.12 (0.1)	0.53 (0.07)	0.29	0.03415	-0.35	0.00514	-0.65	0	-0.11 (0.94)	-0.03 (0.73)	-0.29 (0.9)	0.02 (0.14)	-0.04 (0.16)	-0.25 (0.19)	0.06	0.79411	0.27	0.24761	0.22	0.38999	-0.12	0.3281		0.52 (0.83)	0.74 (0.8)	0.54 (0.79)	0.46 (0.17)	0.66 (0.1)	0.57 (0.1)	-0.19	0.33039	-0.11
388	CD163	CD163	Q86VB7	310	EMIF-AD MBD	MRM	NA		0	0	1			0 (1)	-0.06 (0.8)	0.45 (0.9)	0.15 (0.1)	-0.06 (0.1)	0.37 (0.07)	0.21	0.14534	-0.21	0.10866	-0.42	0.00083	-0.01 (0.73)	-0.06 (0.86)	-0.18 (0.91)	0.1 (0.15)	-0.07 (0.17)	-0.15 (0.21)	0.17	0.45576	0.26	0.31178	0.09	0.75133	-0.12	0.3242		0.36 (0.85)	0.55 (0.91)	0.38 (0.92)	0.31 (0.19)	0.48 (0.11)	0.4 (0.11)	-0.16	0.44801	-0.09
390	CD200	CD200	P41217	302	EMIF-AD MBD	MRM	NA		0	0	1	Decrease		0 (1)	-0.26 (0.89)	0.13 (0.74)	-0.01 (0.1)	-0.26 (0.1)	0.13 (0.07)	0.25	0.08049	-0.14	0.2788	-0.39	0.00169	-0.05 (0.96)	-0.37 (0.74)	-0.54 (0.9)	-0.05 (0.14)	-0.37 (0.16)	-0.54 (0.2)	0.33	0.12455	0.49	0.0431	0.16	0.52803	-0.29	0.0278	Decrease linear	0.33 (0.76)	0.09 (0.8)	0.09 (0.66)	0.32 (0.17)	0.09 (0.1)	0.09 (0.1)	0.23	0.24454	0.23
392	CD248	CD248	Q9HCU0	239	EMIF-AD MBD	MRM	NA		0	0	0			0 (1)	-0.22 (1.22)	0.06 (0.95)	0.02 (0.14)	-0.23 (0.13)	0.05 (0.1)	0.25	0.19758	-0.03	0.86927	-0.28	0.09638	-0.16 (0.66)	-0.08 (1.8)	-0.6 (1.17)	-0.16 (0.2)	-0.08 (0.24)	-0.6 (0.3)	-0.09	0.78344	0.44	0.22014	0.52	0.17224	-0.25	0.212		0.16 (1.12)	0.12 (0.8)	-0.03 (1.06)	0.16 (0.29)	0.13 (0.15)	-0.04 (0.15)	0.03	0.9268	0.19
395	CD320	CD320	Q9NPF0	133	EMIF-AD MBD	MRM	NA		-1	1	1			0 (1)	-0.56 (0.84)	0.38 (0.82)	-0.03 (0.16)	-0.57 (0.15)	0.4 (0.12)	0.54	0.01258	-0.43	0.04276	-0.97	0	-0.48 (0.76)	-0.67 (0.95)	-0.55 (0.88)	-0.53 (0.22)	-0.71 (0.25)	-0.58 (0.3)	0.18	0.58455	0.05	0.89932	-0.13	0.73531	0.01	0.972		0.58 (1)	0.38 (0.84)	0.27 (0.68)	0.6 (0.23)	0.44 (0.16)	0.24 (0.18)	0.16	0.56601	0.36
397	CD40	CD40	P25942	270	ADNI	RBM	0		-1	1	1	Decrease	Decrease	0 (1)	-0.38 (0.93)	0.24 (0.76)	-0.03 (0.11)	-0.4 (0.08)	0.25 (0.07)	0.38	0.00708	-0.28	0.03743	-0.65	0	-0.08 (0.75)	-0.29 (0.97)	-0.87 (0.85)	-0.07 (0.16)	-0.34 (0.11)	-0.91 (0.16)	0.27	0.15737	0.84	0.00022	0.56	0.00276	-0.39	0.0027	Decrease linear	0.83 (0.91)	0.28 (0.71)	0 (0.7)	0.64 (0.22)	0.3 (0.09)	0.03 (0.11)	0.34	0.14522	0.61
398	CD44	CD44	P16070	310	EMIF-AD MBD	MRM	NA		0	1	1			0 (1)	0.06 (0.91)	0.52 (0.79)	0.06 (0.1)	0.05 (0.1)	0.49 (0.07)	0	0.97773	-0.44	0.00066	-0.44	0.00029	0.1 (1.02)	0.05 (0.77)	0 (0.9)	0.1 (0.14)	0.06 (0.16)	0.02 (0.19)	0.04	0.8447	0.07	0.7601	0.03	0.90442	-0.02	0.8704		0.55 (0.73)	0.5 (0.79)	0.53 (0.81)	0.57 (0.18)	0.47 (0.1)	0.55 (0.1)	0.09	0.63805	0.02
401	CD55	CD55	P08174	310	EMIF-AD MBD	MRM	NA		-1	1	1			0 (1)	-0.42 (0.87)	0.29 (0.76)	0 (0.1)	-0.43 (0.1)	0.3 (0.07)	0.42	0.00231	-0.3	0.01717	-0.73	0	-0.24 (0.84)	-0.49 (0.82)	-0.7 (0.95)	-0.28 (0.13)	-0.49 (0.16)	-0.7 (0.19)	0.21	0.32463	0.42	0.07222	0.21	0.3937	-0.21	0.1032		0.48 (0.85)	0.3 (0.72)	0.21 (0.77)	0.51 (0.17)	0.32 (0.1)	0.21 (0.1)	0.19	0.3475	0.29
403	CD59	CD59	P13987	249	ADNI	MRM	0	2	-1	1	1	Decrease	Decrease	0 (1)	-0.84 (1.24)	0.49 (1.28)	-0.05 (0.16)	-0.92 (0.12)	0.47 (0.1)	0.88	2e-05	-0.52	0.00596	-1.4	0	-0.5 (1.32)	-0.85 (1.21)	-1.15 (1.18)	-0.44 (0.25)	-1.01 (0.17)	-1.3 (0.24)	0.57	0.05891	0.86	0.01349	0.29	0.31768	-0.39	0.0369	Decrease linear	1.19 (0.82)	0.64 (1.14)	0.03 (1.44)	0.83 (0.32)	0.64 (0.14)	0.09 (0.17)	0.19	0.584	0.74
404	CD59	CD59	P13987	310	EMIF-AD MBD	MRM	NA	1	-1	0	1		Decrease	0 (1)	-0.41 (0.86)	0.29 (0.71)	0.03 (0.1)	-0.41 (0.09)	0.27 (0.07)	0.45	0.00109	-0.24	0.05633	-0.69	0	-0.25 (0.86)	-0.45 (0.87)	-0.69 (0.8)	-0.25 (0.13)	-0.45 (0.15)	-0.68 (0.18)	0.19	0.33612	0.43	0.05455	0.24	0.3223	-0.21	0.0924		0.52 (0.77)	0.36 (0.65)	0.14 (0.73)	0.52 (0.17)	0.35 (0.09)	0.14 (0.1)	0.17	0.36371	0.38
405	CD5L	CD5L	O43866	310	EMIF-AD MBD	MRM	NA		0	0	2			0 (1)	0.05 (1.16)	-0.23 (0.91)	0 (0.12)	0.05 (0.11)	-0.23 (0.08)	-0.06	0.73374	0.23	0.13337	0.28	0.04856	-0.03 (1.16)	0.22 (1.29)	0 (0.98)	-0.06 (0.17)	0.22 (0.21)	-0.01 (0.25)	-0.28	0.3023	-0.05	0.86608	0.23	0.47736	0.04	0.8284		-0.14 (1.13)	-0.31 (0.65)	-0.18 (1.07)	-0.13 (0.22)	-0.3 (0.12)	-0.18 (0.13)	0.17	0.49321	0.05
406	CD74	CD74	P04233	110	EMIF-AD MBD	MRM	NA		-1	0	0			0 (1)	-0.68 (0.97)	-0.11 (0.92)	0.14 (0.18)	-0.65 (0.18)	-0.21 (0.13)	0.78	0.00215	0.35	0.13395	-0.44	0.05186	-0.5 (0.96)	-0.68 (0.42)	-0.91 (1.33)	-0.38 (0.28)	-0.67 (0.32)	-0.74 (0.31)	0.29	0.49554	0.36	0.38901	0.06	0.88553	-0.19	0.4065		-0.1 (1.04)	-0.08 (0.9)	-0.15 (0.92)	-0.19 (0.29)	-0.21 (0.2)	-0.12 (0.2)	0.02	0.94503	-0.07
407	CD81	CD81	P60033	283	EMIF-AD MBD	MRM	NA		1	0	2			0 (1)	0.25 (1.03)	-0.27 (1.06)	-0.14 (0.12)	0.23 (0.12)	-0.18 (0.09)	-0.36	0.03278	0.04	0.77523	0.41	0.00681	0.38 (1.09)	0.04 (0.86)	0.21 (1.13)	0.18 (0.18)	0.12 (0.23)	0.19 (0.27)	0.06	0.83859	-0.01	0.98232	-0.07	0.84923	0.03	0.8612		-0.39 (0.98)	-0.35 (1.06)	-0.14 (1.09)	-0.31 (0.24)	-0.26 (0.13)	-0.17 (0.13)	-0.06	0.83155	-0.15
410	CD9	CD9	P21926	305	EMIF-AD MBD	MRM	NA		1	0	2			0 (1)	0.51 (1.2)	-0.33 (1.16)	-0.19 (0.13)	0.49 (0.12)	-0.22 (0.09)	-0.68	0.00014	0.03	0.85587	0.71	1e-05	0.74 (1.14)	0.36 (1.01)	0.26 (1.51)	0.52 (0.19)	0.38 (0.23)	0.23 (0.27)	0.14	0.64201	0.29	0.3709	0.16	0.65576	-0.13	0.4177		-0.52 (1.24)	-0.32 (1.05)	-0.27 (1.27)	-0.41 (0.24)	-0.2 (0.14)	-0.31 (0.14)	-0.21	0.44618	-0.1
411	CD93	CD93	Q9NPY3	215	EMIF-AD MBD	MRM	NA		0	0	0			0 (1)	-0.05 (1.06)	-0.06 (0.93)	0.07 (0.14)	-0.05 (0.14)	-0.1 (0.1)	0.12	0.53924	0.17	0.34244	0.05	0.77323	0.17 (0.96)	-0.15 (1.24)	-0.3 (0.92)	0.2 (0.22)	-0.14 (0.23)	-0.27 (0.3)	0.34	0.28153	0.47	0.204	0.12	0.73984	-0.22	0.2834		-0.44 (1.06)	0 (0.87)	0.01 (0.94)	-0.44 (0.25)	-0.03 (0.14)	0.02 (0.15)	-0.41	0.14679	-0.46
413	CD99	CD99	P14209	151	EMIF-AD MBD	MRM	NA		-1	0	0			0 (1)	-0.65 (1.45)	-0.19 (1.1)	0 (0.21)	-0.63 (0.18)	-0.2 (0.14)	0.63	0.02389	0.2	0.46224	-0.43	0.07093	-0.7 (1.22)	-0.74 (2.09)	-0.43 (1.1)	-0.67 (0.28)	-0.67 (0.38)	-0.55 (0.42)	0	0.99279	-0.12	0.81183	-0.12	0.82742	-0.02	0.9569		-0.07 (1.16)	-0.26 (1.07)	-0.14 (1.13)	-0.13 (0.34)	-0.23 (0.21)	-0.17 (0.25)	0.11	0.7828	0.04
414	CD99L2	CD99L2	Q8TCZ2	310	EMIF-AD MBD	MRM	NA		-1	1	1	Decrease		0 (1)	-0.44 (0.84)	0.41 (0.76)	0.02 (0.1)	-0.45 (0.1)	0.4 (0.07)	0.47	0.00073	-0.38	0.00288	-0.85	0	-0.22 (0.77)	-0.5 (0.86)	-0.82 (0.86)	-0.22 (0.13)	-0.5 (0.16)	-0.81 (0.19)	0.28	0.17569	0.59	0.01109	0.31	0.21385	-0.29	0.0177	Decrease linear	0.54 (0.78)	0.46 (0.72)	0.31 (0.8)	0.55 (0.17)	0.45 (0.1)	0.31 (0.1)	0.1	0.62324	0.24
416	CDH1	CDH1	P12830	164	EMIF-AD MBD	MRM	NA		0	0	0			0 (1)	0.03 (0.81)	-0.13 (0.85)	-0.07 (0.16)	0.02 (0.14)	-0.09 (0.1)	-0.09	0.66675	0.03	0.88257	0.12	0.48988	-0.05 (0.81)	0.27 (0.78)	-0.18 (0.87)	-0.08 (0.19)	0.24 (0.24)	-0.17 (0.3)	-0.33	0.27727	0.09	0.80158	0.42	0.27414	0	0.9909		-0.17 (0.91)	-0.2 (0.73)	-0.01 (0.98)	-0.15 (0.23)	-0.16 (0.13)	-0.03 (0.15)	0.01	0.97359	-0.12
417	CDH10	CDH10	Q9Y6N8	310	EMIF-AD MBD	MRM	NA		-1	0	1			0 (1)	-0.53 (1.03)	0.03 (0.85)	-0.09 (0.11)	-0.54 (0.11)	0.08 (0.08)	0.45	0.00304	-0.17	0.23349	-0.62	0	-0.49 (1.02)	-0.39 (1.16)	-0.81 (0.87)	-0.58 (0.15)	-0.38 (0.18)	-0.83 (0.22)	-0.2	0.41175	0.24	0.36503	0.44	0.12553	-0.1	0.5256		0.1 (0.73)	-0.04 (0.93)	0.08 (0.8)	0.14 (0.2)	0.02 (0.11)	0.06 (0.12)	0.12	0.58456	0.08
418	CDH11	CDH11	P55287	310	EMIF-AD MBD	MRM	NA		-1	0	1			0 (1)	-0.39 (0.87)	0.08 (0.82)	0 (0.1)	-0.39 (0.1)	0.09 (0.07)	0.4	0.00634	-0.08	0.52333	-0.48	0.00016	-0.24 (0.94)	-0.38 (0.8)	-0.72 (0.77)	-0.26 (0.14)	-0.38 (0.17)	-0.72 (0.2)	0.12	0.60481	0.45	0.06725	0.34	0.20212	-0.22	0.0875		0.13 (0.98)	0.18 (0.75)	-0.03 (0.83)	0.14 (0.18)	0.18 (0.1)	-0.03 (0.11)	-0.04	0.83424	0.17
419	CDH12	CDH12	P55289	142	EMIF-AD MBD	MRM	NA		-1	0	1	Decrease		0 (1)	-0.64 (1.01)	-0.15 (0.75)	0 (0.16)	-0.66 (0.14)	-0.15 (0.12)	0.66	0.00183	0.15	0.47362	-0.51	0.00474	-0.53 (0.67)	-0.25 (1.04)	-1.29 (1.11)	-0.59 (0.22)	-0.28 (0.21)	-1.26 (0.24)	-0.31	0.30189	0.67	0.04401	0.98	0.00294	-0.33	0.1217	Decrease non-linear	0.14 (0.85)	-0.05 (0.74)	-0.35 (0.7)	0.17 (0.31)	-0.04 (0.15)	-0.33 (0.16)	0.22	0.53107	0.5
420	CDH13	CDH13	P55290	249	ADNI	MRM	1	2	-1	1	1	Decrease		0 (0.9)	-0.73 (1.25)	0.71 (1.18)	-0.03 (0.16)	-0.75 (0.12)	0.72 (0.1)	0.73	0.00037	-0.74	0.00012	-1.47	0	-0.24 (1.15)	-0.72 (1.28)	-1.21 (1.14)	-0.23 (0.25)	-0.78 (0.17)	-1.26 (0.25)	0.55	0.07417	1.03	0.00426	0.48	0.11495	-0.48	0.0106	Decrease linear	0.98 (1.02)	0.92 (1.13)	0.3 (1.23)	0.77 (0.33)	0.95 (0.14)	0.33 (0.18)	-0.17	0.63015	0.44
421	CDH13	CDH13	P55290	310	EMIF-AD MBD	MRM	NA	1	-1	1	1	Decrease	Decrease	0 (1)	-0.56 (0.91)	0.44 (0.83)	0.05 (0.1)	-0.57 (0.1)	0.41 (0.07)	0.62	2e-05	-0.36	0.00665	-0.98	0	-0.33 (0.78)	-0.56 (0.88)	-1.04 (1.07)	-0.33 (0.14)	-0.56 (0.17)	-1.02 (0.2)	0.24	0.28219	0.7	0.0048	0.46	0.08146	-0.34	0.0122	Decrease linear	0.64 (0.95)	0.55 (0.67)	0.25 (0.91)	0.65 (0.18)	0.53 (0.1)	0.26 (0.11)	0.12	0.57665	0.39
422	CDH15	CDH15	P55291	310	EMIF-AD MBD	MRM	NA		0	0	1			0 (1)	-0.38 (1.07)	0.02 (0.93)	-0.09 (0.11)	-0.38 (0.11)	0.07 (0.08)	0.29	0.06876	-0.16	0.27727	-0.45	0.0013	-0.31 (1.03)	-0.33 (1.14)	-0.6 (1.11)	-0.4 (0.17)	-0.33 (0.2)	-0.63 (0.24)	-0.07	0.78885	0.23	0.42332	0.3	0.3314	-0.14	0.3882		0.04 (1.21)	0.04 (0.86)	-0.02 (0.91)	0.08 (0.21)	0.11 (0.12)	-0.05 (0.12)	-0.03	0.90603	0.12
423	CDH18	CDH18	Q13634	290	EMIF-AD MBD	MRM	NA		-1	1	1	Decrease	Decrease	0 (1)	-0.34 (1.03)	0.33 (0.72)	-0.03 (0.1)	-0.35 (0.1)	0.35 (0.08)	0.32	0.03336	-0.38	0.00516	-0.7	0	0 (0.89)	-0.55 (1.07)	-0.71 (1.07)	-0.05 (0.15)	-0.55 (0.17)	-0.7 (0.2)	0.5	0.02943	0.65	0.01011	0.16	0.55313	-0.32	0.0389	Decrease linear	0.42 (0.84)	0.44 (0.62)	0.16 (0.76)	0.44 (0.19)	0.46 (0.1)	0.16 (0.11)	-0.02	0.90859	0.28
424	CDH2	CDH2	P19022	310	EMIF-AD MBD	MRM	NA		-1	1	1			0 (1)	-0.52 (0.84)	0.42 (0.75)	0.02 (0.1)	-0.52 (0.1)	0.41 (0.07)	0.55	8e-05	-0.39	0.00216	-0.93	0	-0.4 (0.8)	-0.52 (0.77)	-0.77 (1)	-0.41 (0.13)	-0.52 (0.16)	-0.77 (0.19)	0.11	0.58875	0.36	0.11659	0.25	0.31171	-0.18	0.1425		0.54 (0.84)	0.49 (0.71)	0.3 (0.76)	0.55 (0.17)	0.49 (0.1)	0.3 (0.1)	0.07	0.72903	0.25
426	CDH22	CDH22	Q9UJ99	273	EMIF-AD MBD	MRM	NA		-1	0	1		Decrease	0 (1)	-0.59 (0.76)	0.05 (0.81)	-0.03 (0.11)	-0.59 (0.1)	0.07 (0.07)	0.56	0.00022	-0.1	0.48014	-0.66	0	-0.58 (0.77)	-0.42 (0.76)	-0.87 (0.72)	-0.62 (0.15)	-0.41 (0.17)	-0.87 (0.2)	-0.21	0.35341	0.25	0.31945	0.46	0.08531	-0.11	0.3715		0.19 (0.93)	0.19 (0.65)	-0.13 (0.9)	0.2 (0.19)	0.22 (0.1)	-0.14 (0.1)	-0.01	0.94403	0.34
427	CDH23	CDH23	Q9H251	96	EMIF-AD MBD	MRM	NA		0	0	0			0 (1)	-0.22 (0.8)	0 (0.86)	-0.17 (0.19)	-0.21 (0.17)	0.09 (0.14)	0.04	0.86881	-0.25	0.31917	-0.29	0.18838	-0.25 (0.93)	-0.24 (0.8)	-0.06 (0.38)	-0.26 (0.24)	-0.28 (0.26)	-0.21 (0.42)	0.03	0.94055	-0.04	0.92922	-0.07	0.88793	-0.01	0.9641		0.04 (0.94)	-0.12 (0.89)	0.1 (0.82)	0.05 (0.26)	-0.07 (0.2)	0.1 (0.2)	0.12	0.72016	-0.05
428	CDH3	CDH3	P22223	142	EMIF-AD MBD	MRM	NA		0	0	1			0 (1)	-0.51 (1.1)	-0.11 (0.98)	-0.07 (0.17)	-0.53 (0.18)	-0.06 (0.13)	0.46	0.06024	-0.01	0.97488	-0.46	0.03441	-0.43 (1.05)	-0.61 (1.37)	-0.59 (0.78)	-0.46 (0.25)	-0.59 (0.31)	-0.7 (0.48)	0.13	0.75794	0.24	0.65342	0.11	0.84322	-0.09	0.7276		-0.45 (1.14)	-0.19 (0.92)	0.12 (0.97)	-0.41 (0.32)	-0.16 (0.19)	0.11 (0.21)	-0.25	0.49053	-0.52
429	CDH4	CDH4	P55283	303	EMIF-AD MBD	MRM	NA		-1	1	1	Decrease		0 (1)	-0.63 (0.99)	0.44 (0.95)	0.03 (0.11)	-0.64 (0.11)	0.43 (0.08)	0.67	4e-05	-0.4	0.00646	-1.07	0	-0.4 (0.97)	-0.61 (0.9)	-1.12 (1.02)	-0.41 (0.17)	-0.61 (0.2)	-1.12 (0.23)	0.2	0.4543	0.71	0.01347	0.51	0.09882	-0.36	0.0131	Decrease linear	0.48 (1.04)	0.51 (0.81)	0.35 (1.06)	0.49 (0.21)	0.52 (0.12)	0.35 (0.12)	-0.02	0.9205	0.14
430	CDH5	CDH5	P33151	310	EMIF-AD MBD	MRM	NA		0	0	0			0 (1)	-0.03 (0.91)	-0.08 (0.9)	0.05 (0.11)	-0.03 (0.11)	-0.11 (0.08)	0.08	0.61396	0.16	0.26226	0.08	0.54434	-0.19 (0.83)	0.27 (1.02)	-0.13 (0.87)	-0.15 (0.15)	0.27 (0.18)	-0.12 (0.22)	-0.41	0.08759	-0.02	0.92929	0.39	0.17533	0.03	0.7989		-0.05 (1.19)	-0.1 (0.83)	-0.05 (0.88)	-0.07 (0.2)	-0.12 (0.11)	-0.05 (0.11)	0.05	0.8379	-0.03
431	CDH6	CDH6	P55285	310	EMIF-AD MBD	MRM	NA		-1	0	1	Decrease	Decrease	0 (1)	-0.44 (0.85)	0.2 (0.74)	0.01 (0.1)	-0.44 (0.09)	0.2 (0.07)	0.45	0.00097	-0.19	0.12196	-0.64	0	-0.26 (0.74)	-0.42 (0.85)	-0.83 (0.96)	-0.28 (0.13)	-0.41 (0.15)	-0.83 (0.18)	0.13	0.51381	0.55	0.01493	0.42	0.08359	-0.26	0.0372	Decrease linear	0.29 (0.93)	0.36 (0.64)	0 (0.73)	0.3 (0.17)	0.36 (0.09)	0 (0.1)	-0.06	0.75961	0.3
432	CDH7	CDH7	Q9ULB5	281	EMIF-AD MBD	MRM	NA		-1	0	1	Decrease		0 (1)	-0.52 (0.97)	0.08 (0.75)	-0.07 (0.11)	-0.52 (0.1)	0.12 (0.08)	0.45	0.00301	-0.19	0.16925	-0.64	0	-0.28 (0.95)	-0.59 (0.95)	-0.87 (0.98)	-0.36 (0.15)	-0.6 (0.18)	-0.89 (0.2)	0.24	0.29335	0.53	0.03423	0.28	0.29156	-0.28	0.0507	Decrease non-linear	0.13 (0.93)	0.13 (0.63)	-0.01 (0.82)	0.17 (0.19)	0.18 (0.1)	-0.03 (0.12)	-0.02	0.94309	0.2
433	CDH8	CDH8	P55286	310	EMIF-AD MBD	MRM	NA		-1	0	1	Decrease	Decrease	0 (1)	-0.8 (0.92)	0.01 (0.86)	-0.05 (0.11)	-0.81 (0.1)	0.04 (0.08)	0.76	0	-0.09	0.52473	-0.85	0	-0.65 (0.74)	-0.66 (1.05)	-1.3 (0.93)	-0.72 (0.15)	-0.66 (0.18)	-1.31 (0.21)	-0.07	0.76383	0.59	0.02146	0.66	0.01664	-0.26	0.0483	Decrease linear	0.29 (0.96)	0.03 (0.8)	-0.11 (0.88)	0.33 (0.19)	0.07 (0.11)	-0.12 (0.11)	0.26	0.22436	0.45
434	CDH9	CDH9	Q9ULB4	197	EMIF-AD MBD	MRM	NA		-1	0	1		Decrease	0 (1)	-0.88 (1.02)	-0.13 (0.98)	-0.06 (0.15)	-0.88 (0.14)	-0.1 (0.1)	0.82	0.0001	0.05	0.80939	-0.78	2e-05	-1.07 (0.88)	-0.33 (0.91)	-1.26 (1.14)	-1.15 (0.23)	-0.32 (0.24)	-1.25 (0.27)	-0.83	0.0157	0.11	0.76329	0.93	0.01096	-0.09	0.6618		0.17 (1.12)	0.02 (0.99)	-0.34 (0.91)	0.18 (0.31)	0.05 (0.15)	-0.34 (0.14)	0.13	0.69458	0.52
436	CDKL1	CDKL1	Q00532	229	EMIF-AD MBD	MRM	NA		0	0	1			0 (1)	-0.2 (1.13)	0.36 (1.05)	0.15 (0.14)	-0.19 (0.13)	0.28 (0.1)	0.34	0.08331	-0.12	0.5045	-0.46	0.00635	-0.29 (0.91)	-0.2 (1.46)	0 (1.07)	-0.19 (0.21)	-0.2 (0.25)	0.01 (0.3)	0.01	0.96417	-0.2	0.57856	-0.22	0.57923	0.04	0.8053		0.35 (1.09)	0.42 (0.96)	0.31 (1.14)	0.29 (0.26)	0.35 (0.16)	0.33 (0.16)	-0.06	0.84198	-0.04
438	CEL	CEL	P19835	289	EMIF-AD MBD	MRM	NA		1	0	2			0 (1)	0.79 (1.56)	-0.12 (1.09)	0.03 (0.14)	0.79 (0.14)	-0.13 (0.11)	-0.76	0.00023	0.16	0.38594	0.92	0	0.54 (1.27)	1.28 (1.54)	0.52 (1.99)	0.53 (0.23)	1.28 (0.26)	0.52 (0.32)	-0.75	0.03361	0.01	0.97774	0.76	0.0656	0.1	0.6898		-0.26 (1.48)	-0.08 (0.91)	-0.11 (1.13)	-0.25 (0.28)	-0.07 (0.16)	-0.11 (0.17)	-0.18	0.57537	-0.15
439	CELSR2	CELSR2	Q9HCU4	310	EMIF-AD MBD	MRM	NA		-1	1	1	Decrease		0 (1)	-0.54 (0.99)	0.32 (0.87)	0 (0.11)	-0.55 (0.1)	0.33 (0.08)	0.55	0.00029	-0.33	0.01619	-0.88	0	-0.26 (0.82)	-0.66 (0.91)	-0.95 (1.27)	-0.3 (0.15)	-0.66 (0.18)	-0.95 (0.22)	0.36	0.13254	0.65	0.01468	0.29	0.30672	-0.33	0.0206	Decrease linear	0.57 (0.97)	0.36 (0.83)	0.19 (0.87)	0.6 (0.19)	0.37 (0.11)	0.19 (0.11)	0.23	0.30718	0.41
440	CEMIP	CEMIP	Q8WUJ3	295	EMIF-AD MBD	MRM	NA		0	0	0			0 (1)	0.1 (0.96)	-0.01 (0.96)	0.02 (0.12)	0.1 (0.11)	-0.02 (0.08)	-0.08	0.62006	0.04	0.78695	0.12	0.38743	0.04 (0.97)	0.26 (0.77)	0 (1.21)	0.08 (0.16)	0.26 (0.2)	0.01 (0.24)	-0.19	0.47516	0.07	0.82133	0.25	0.42352	-0.01	0.9246		-0.39 (0.94)	0.12 (0.93)	-0.01 (0.98)	-0.42 (0.22)	0.1 (0.12)	-0.01 (0.13)	-0.51	0.03849	-0.41
441	CEND1	CEND1	Q8N111	139	EMIF-AD MBD	MRM	NA		0	1	0			0 (1)	0.18 (0.57)	0.41 (0.73)	0 (0.15)	0.18 (0.13)	0.41 (0.1)	-0.18	0.34038	-0.41	0.03054	-0.23	0.17884	0.35 (0.45)	0.01 (0.66)	-0.08 (0.72)	0.33 (0.17)	0.01 (0.21)	-0.1 (0.31)	0.32	0.22711	0.42	0.22274	0.1	0.77805	-0.24	0.0842		0.49 (0.76)	0.26 (0.6)	0.56 (0.85)	0.49 (0.21)	0.27 (0.12)	0.56 (0.13)	0.22	0.35809	-0.07
442	CENPF	CENPF	P49454	279	EMIF-AD MBD	MRM	NA		0	1	1			0 (1)	-0.15 (0.99)	0.55 (0.98)	0.15 (0.12)	-0.16 (0.12)	0.48 (0.08)	0.3	0.07776	-0.33	0.03051	-0.63	2e-05	-0.35 (1.06)	0.05 (0.86)	0.02 (0.99)	-0.24 (0.17)	0.01 (0.22)	0.05 (0.25)	-0.25	0.37574	-0.3	0.32915	-0.04	0.89371	0.17	0.2583		0.39 (0.95)	0.68 (0.99)	0.47 (0.97)	0.34 (0.22)	0.62 (0.12)	0.5 (0.13)	-0.28	0.25833	-0.17
443	APP_ab38	APP	P05067	309	EMIF-AD MBD	ELISA	NA	1	-1	1	1			0 (1)	-0.83 (0.93)	0.74 (1.46)	0.11 (0.14)	-0.83 (0.14)	0.68 (0.1)	0.94	0	-0.57	0.00202	-1.51	0	-0.69 (1.08)	-1.04 (0.67)	-0.84 (0.89)	-0.62 (0.22)	-1.05 (0.27)	-0.82 (0.32)	0.42	0.22888	0.2	0.6083	-0.23	0.58654	-0.17	0.1927		1 (1.74)	0.92 (1.49)	0.45 (1.3)	0.98 (0.28)	0.87 (0.16)	0.47 (0.17)	0.11	0.74663	0.51
444	APP_ab40	APP	P05067	310	EMIF-AD MBD	ELISA	NA	1	-1	1	1			0 (1)	-0.82 (1.02)	0.75 (1.32)	0.08 (0.14)	-0.82 (0.13)	0.7 (0.1)	0.9	0	-0.62	0.00048	-1.52	0	-0.71 (1.16)	-1.07 (0.85)	-0.7 (0.92)	-0.65 (0.21)	-1.07 (0.25)	-0.68 (0.3)	0.42	0.20343	0.03	0.9361	-0.39	0.31959	-0.11	0.4582		0.94 (1.73)	0.83 (1.29)	0.59 (1.2)	0.92 (0.27)	0.79 (0.15)	0.6 (0.16)	0.13	0.68031	0.32
447	NEFL	NEFL	P07196	308	EMIF-AD MBD	ELISA	NA	1	0	0	0		Increase	0 (1)	0.69 (2.83)	2.97 (8.95)	0.88 (0.74)	0.75 (0.73)	2.46 (0.53)	0.13	0.90016	-1.58	0.09557	-1.71	0.05894	-0.07 (1.2)	0.44 (2.06)	2.77 (4.87)	1.05 (1.24)	0.35 (1.51)	2.86 (1.82)	0.7	0.72273	-1.81	0.40988	-2.51	0.28954	1.09	0.0048		1.48 (1.49)	2.29 (3.66)	4.21 (13.37)	0.99 (1.59)	1.64 (0.9)	4.45 (0.92)	-0.65	0.71922	-3.46
448	NRGN	NRGN	Q92686	285	EMIF-AD MBD	ELISA	NA	1	-1	1	1		Decrease	0 (1)	-0.24 (0.23)	0.34 (0.61)	0 (0.08)	-0.25 (0.08)	0.34 (0.06)	0.25	0.03733	-0.34	0.00178	-0.58	0	-0.22 (0.24)	-0.28 (0.17)	-0.24 (0.26)	-0.23 (0.1)	-0.29 (0.12)	-0.23 (0.14)	0.06	0.67422	0	0.988	-0.07	0.72357	-0.03	0.4764		0.62 (0.94)	0.38 (0.6)	0.2 (0.45)	0.63 (0.12)	0.38 (0.06)	0.2 (0.07)	0.25	0.05744	0.42
449	CHI3L1	CHI3L1	P36222	310	EMIF-AD MBD	ELISA	NA	1	-1	1	1			0 (1)	-0.07 (0.95)	1.41 (1.32)	0.33 (0.12)	-0.05 (0.12)	1.22 (0.09)	0.38	0.02717	-0.9	0	-1.28	0	-0.15 (0.94)	-0.01 (0.99)	0.05 (0.94)	0.13 (0.19)	-0.03 (0.22)	0.13 (0.27)	0.16	0.58344	0	0.99118	-0.16	0.6374	0	0.9833		1.67 (1.51)	1.49 (1.34)	1.23 (1.22)	1.56 (0.24)	1.3 (0.14)	1.29 (0.14)	0.26	0.3426	0.26
450	CETP	CETP	P11597	264	EMIF-AD MBD	MRM	NA		-1	0	1			0 (1)	-0.56 (1.53)	-0.14 (1.04)	0 (0.14)	-0.57 (0.15)	-0.14 (0.11)	0.57	0.00588	0.14	0.45046	-0.43	0.02027	-0.55 (1.53)	-0.75 (1.71)	-0.3 (1.22)	-0.57 (0.24)	-0.74 (0.26)	-0.31 (0.34)	0.16	0.64257	-0.26	0.52653	-0.43	0.3249	0.04	0.866		-0.31 (1.34)	-0.15 (1)	-0.07 (0.96)	-0.3 (0.28)	-0.14 (0.17)	-0.07 (0.18)	-0.16	0.6255	-0.23
451	CFB	CFB	P00751	249	ADNI	MRM	1	2	0	0	0			0 (0.96)	-0.11 (1.13)	-0.25 (0.97)	-0.03 (0.14)	-0.17 (0.11)	-0.27 (0.09)	0.15	0.41322	0.24	0.1498	0.1	0.49214	-0.14 (0.9)	-0.23 (1.12)	0.15 (1.33)	-0.1 (0.22)	-0.32 (0.15)	0.06 (0.22)	0.22	0.41101	-0.16	0.61364	-0.38	0.14911	0.11	0.5563		0.03 (0.82)	-0.27 (0.88)	-0.31 (1.13)	-0.18 (0.29)	-0.28 (0.13)	-0.28 (0.16)	0.11	0.73767	0.1
452	CFB	CFB	P00751	310	EMIF-AD MBD	MRM	NA	1	0	-1	2			0 (1)	0.2 (0.9)	-0.4 (0.91)	-0.07 (0.11)	0.21 (0.1)	-0.36 (0.08)	-0.27	0.06974	0.3	0.03299	0.57	2e-05	0.05 (0.74)	0.41 (0.93)	0.23 (1.15)	-0.01 (0.15)	0.41 (0.18)	0.21 (0.22)	-0.42	0.07822	-0.22	0.41695	0.21	0.46673	0.14	0.2848		-0.44 (0.98)	-0.44 (0.83)	-0.33 (0.97)	-0.42 (0.2)	-0.39 (0.11)	-0.35 (0.11)	-0.03	0.89228	-0.07
453	CFD	CFD	P00746	310	EMIF-AD MBD	MRM	NA		-1	0	1	Increase		0 (1)	-0.18 (1.13)	0.36 (1.09)	0.21 (0.12)	-0.16 (0.12)	0.23 (0.09)	0.37	0.02572	-0.03	0.86558	-0.4	0.0063	-0.54 (1.12)	0.05 (1.09)	0.24 (1.03)	-0.33 (0.18)	0.03 (0.21)	0.28 (0.25)	-0.37	0.1817	-0.61	0.04603	-0.24	0.45723	0.32	0.0367	Increase linear	0.4 (1.04)	0.48 (1.11)	0.21 (1.09)	0.3 (0.22)	0.36 (0.13)	0.25 (0.13)	-0.06	0.81115	0.05
454	CFH	CFH	P08603	324	ADNI	ELISA	0	2	0	0	1			0 (1)	-0.11 (1.03)	0.07 (1.03)	-0.01 (0.12)	-0.21 (0.09)	0.04 (0.08)	0.19	0.21042	-0.05	0.72282	-0.24	0.03841	-0.29 (0.99)	-0.11 (1.01)	0.09 (1.1)	-0.28 (0.17)	-0.24 (0.13)	-0.07 (0.18)	-0.04	0.86373	-0.21	0.40324	-0.17	0.42613	0.1	0.4288		0.45 (1.19)	-0.13 (0.87)	0.26 (1.15)	0.21 (0.25)	-0.17 (0.11)	0.28 (0.13)	0.37	0.17379	-0.07
455	CFH	CFH	P08603	310	EMIF-AD MBD	MRM	NA	1	0	0	0			0 (1)	0.01 (0.85)	0.01 (1.08)	0.07 (0.12)	0.02 (0.11)	-0.03 (0.08)	0.05	0.77442	0.1	0.5224	0.05	0.72862	-0.2 (0.89)	0.32 (0.92)	0.01 (0.52)	-0.12 (0.17)	0.32 (0.2)	0.01 (0.24)	-0.44	0.10001	-0.13	0.64944	0.3	0.33604	0.12	0.3523		-0.1 (1.23)	-0.04 (1.03)	0.11 (1.09)	-0.14 (0.22)	-0.08 (0.12)	0.12 (0.13)	-0.06	0.79935	-0.26
456	CFHR1	CFHR1	Q03591	310	EMIF-AD MBD	MRM	NA		0	0	0			0 (1)	0.12 (0.89)	-0.1 (0.92)	0.01 (0.11)	0.12 (0.11)	-0.11 (0.08)	-0.11	0.47112	0.11	0.41809	0.22	0.09311	0.08 (0.76)	0.05 (0.84)	0.32 (1.19)	0.1 (0.16)	0.05 (0.19)	0.32 (0.22)	0.05	0.83661	-0.22	0.41463	-0.27	0.35043	0.1	0.4532		-0.28 (1.04)	-0.06 (0.84)	-0.09 (0.98)	-0.29 (0.2)	-0.07 (0.11)	-0.08 (0.12)	-0.23	0.32802	-0.21
457	CFHR2	CFHR2	P36980	310	EMIF-AD MBD	MRM	NA		0	0	2			0 (1)	0.33 (0.96)	-0.05 (1.02)	0.08 (0.12)	0.33 (0.11)	-0.1 (0.08)	-0.25	0.12778	0.18	0.22908	0.43	0.00269	0.11 (0.94)	0.48 (0.96)	0.57 (0.94)	0.17 (0.17)	0.48 (0.2)	0.59 (0.24)	-0.31	0.24596	-0.42	0.15605	-0.11	0.72716	0.2	0.1544		-0.38 (1.14)	-0.06 (1.06)	0.07 (0.93)	-0.4 (0.22)	-0.1 (0.12)	0.09 (0.13)	-0.29	0.23615	-0.48
458	CFHR3	CFHR3	Q02985	159	EMIF-AD MBD	MRM	NA		0	0	0			0 (1)	0.05 (1.16)	-0.16 (1.07)	0.04 (0.18)	0.05 (0.16)	-0.18 (0.13)	-0.01	0.97625	0.23	0.33575	0.23	0.26962	0.09 (1.21)	0.15 (0.78)	-0.15 (1.5)	0.1 (0.26)	0.19 (0.31)	-0.13 (0.34)	-0.09	0.82192	0.24	0.5766	0.33	0.47496	-0.09	0.6848		-0.72 (1.44)	-0.02 (1.11)	-0.11 (0.8)	-0.71 (0.34)	-0.06 (0.2)	-0.1 (0.21)	-0.65	0.10088	-0.62
461	CFI	CFI	P05156	310	EMIF-AD MBD	MRM	NA		0	-1	2			0 (1)	0.17 (0.97)	-0.34 (0.94)	-0.03 (0.11)	0.18 (0.11)	-0.33 (0.08)	-0.21	0.18229	0.29	0.04262	0.5	0.00027	-0.07 (0.87)	0.39 (1.01)	0.38 (1.07)	-0.09 (0.16)	0.39 (0.19)	0.37 (0.23)	-0.47	0.06369	-0.45	0.10703	0.02	0.95407	0.24	0.0943		-0.45 (1.26)	-0.38 (0.81)	-0.27 (0.96)	-0.45 (0.21)	-0.36 (0.12)	-0.27 (0.12)	-0.09	0.71954	-0.18
462	CFL1	CFL1	P23528	291	EMIF-AD MBD	MRM	NA		0	0	0			0 (1)	0.02 (0.65)	0.11 (0.78)	0.01 (0.1)	0.02 (0.09)	0.11 (0.07)	-0.01	0.91681	-0.1	0.42249	-0.09	0.45958	0.05 (0.7)	0.06 (0.59)	-0.09 (0.67)	0.08 (0.13)	0.06 (0.15)	-0.08 (0.18)	0.02	0.9206	0.16	0.46967	0.14	0.55729	-0.09	0.3564		-0.24 (0.76)	0.23 (0.75)	0.1 (0.79)	-0.24 (0.16)	0.22 (0.09)	0.1 (0.1)	-0.45	0.01474	-0.34
464	CFP	CFP	P27918	270	EMIF-AD MBD	MRM	NA		0	-1	0			0 (1)	-0.03 (0.96)	-0.22 (0.81)	0.03 (0.11)	-0.01 (0.11)	-0.25 (0.08)	0.04	0.77424	0.28	0.04874	0.24	0.07915	-0.24 (0.94)	0.13 (1.04)	0.18 (0.87)	-0.18 (0.15)	0.15 (0.19)	0.18 (0.21)	-0.32	0.1872	-0.36	0.17194	-0.03	0.90465	0.17	0.2394		-0.41 (0.95)	-0.25 (0.69)	-0.12 (0.87)	-0.44 (0.19)	-0.28 (0.11)	-0.11 (0.12)	-0.16	0.45288	-0.34
465	CGREF1	CGREF1	Q99674	310	EMIF-AD MBD	MRM	NA		-1	1	1	Decrease	Decrease	0 (1)	-0.67 (0.96)	0.25 (0.89)	-0.02 (0.11)	-0.68 (0.11)	0.26 (0.08)	0.66	2e-05	-0.28	0.04939	-0.94	0	-0.41 (0.78)	-0.65 (0.94)	-1.24 (1.14)	-0.46 (0.15)	-0.65 (0.18)	-1.24 (0.22)	0.19	0.41993	0.79	0.00313	0.6	0.03625	-0.4	0.0038	Decrease linear	0.58 (0.89)	0.34 (0.86)	0.03 (0.89)	0.6 (0.2)	0.36 (0.11)	0.02 (0.11)	0.24	0.28727	0.58
466	CHAD	CHAD	O15335	310	EMIF-AD MBD	MRM	NA		0	1	1			0 (1)	-0.34 (0.99)	0.04 (0.83)	-0.15 (0.1)	-0.35 (0.1)	0.13 (0.07)	0.21	0.1533	-0.28	0.03669	-0.48	0.00014	-0.1 (0.87)	-0.52 (1.2)	-0.59 (0.85)	-0.25 (0.15)	-0.51 (0.17)	-0.62 (0.21)	0.26	0.24989	0.37	0.13834	0.11	0.67694	-0.21	0.1362		0.06 (0.76)	0.05 (0.82)	0.03 (0.87)	0.13 (0.19)	0.13 (0.11)	0 (0.11)	0	0.98165	0.13
467	CHGA	CHGA	P10645	249	ADNI	MRM	1	2	-1	1	1	Decrease	Decrease	0.01 (0.9)	-0.62 (0.96)	0.48 (0.91)	-0.01 (0.13)	-0.63 (0.1)	0.49 (0.08)	0.61	0.00021	-0.5	0.00132	-1.12	0	-0.31 (1)	-0.55 (0.94)	-1.05 (0.86)	-0.31 (0.2)	-0.57 (0.14)	-1.06 (0.19)	0.26	0.27443	0.75	0.00713	0.49	0.03718	-0.37	0.0124	Decrease linear	0.87 (0.64)	0.62 (0.9)	0.15 (0.92)	0.75 (0.26)	0.64 (0.11)	0.17 (0.14)	0.11	0.70529	0.58
468	CHGA	CHGA	P10645	310	EMIF-AD MBD	MRM	NA	1	-1	1	1	Decrease	Decrease	0 (1)	-0.64 (0.93)	0.36 (0.91)	0.03 (0.11)	-0.65 (0.11)	0.35 (0.08)	0.68	1e-05	-0.31	0.02442	-0.99	0	-0.32 (0.76)	-0.76 (0.89)	-1.15 (1.11)	-0.31 (0.15)	-0.75 (0.18)	-1.13 (0.22)	0.44	0.06199	0.82	0.00201	0.38	0.18244	-0.41	0.0023	Decrease linear	0.59 (0.99)	0.47 (0.86)	0.17 (0.92)	0.59 (0.19)	0.45 (0.11)	0.18 (0.11)	0.14	0.51833	0.42
469	CHGA _EDSLEAGLPLQVR	CHGA	P10645	249	ADNI	MRM	0	2	-1	0	1	Decrease		0 (1)	-0.46 (0.98)	0.26 (0.87)	-0.01 (0.13)	-0.46 (0.1)	0.27 (0.09)	0.45	0.00776	-0.27	0.08867	-0.73	0	-0.32 (1.24)	-0.34 (0.66)	-0.85 (1.19)	-0.33 (0.2)	-0.34 (0.14)	-0.85 (0.2)	0.02	0.95053	0.52	0.06917	0.51	0.03664	-0.25	0.1214	Decrease non-linear	0.44 (0.56)	0.35 (1.01)	0.06 (0.69)	0.39 (0.27)	0.37 (0.12)	0.07 (0.14)	0.02	0.94117	0.32
470	CHGB	CHGB	P05060	249	ADNI	MRM	1	2	-1	0	1	Decrease	Decrease	0 (0.89)	-0.77 (1.09)	0.06 (0.87)	-0.02 (0.13)	-0.79 (0.1)	0.07 (0.09)	0.77	1e-05	-0.09	0.58773	-0.86	0	-0.63 (1.22)	-0.63 (0.96)	-1.2 (1.13)	-0.61 (0.21)	-0.68 (0.14)	-1.24 (0.2)	0.07	0.77174	0.63	0.03047	0.56	0.02326	-0.31	0.0705	Decrease non-linear	0.52 (0.7)	0.15 (0.73)	-0.21 (1.04)	0.37 (0.27)	0.16 (0.12)	-0.19 (0.14)	0.21	0.46273	0.56
471	CHGB	CHGB	P05060	310	EMIF-AD MBD	MRM	NA	1	-1	0	1	Decrease	Decrease	0 (1)	-0.48 (1.03)	0.14 (0.73)	-0.06 (0.1)	-0.49 (0.1)	0.18 (0.07)	0.43	0.00301	-0.24	0.06567	-0.67	0	-0.14 (0.83)	-0.59 (0.85)	-1.05 (1.37)	-0.22 (0.14)	-0.58 (0.17)	-1.06 (0.2)	0.36	0.09653	0.84	0.00058	0.48	0.06522	-0.41	0.005	Decrease linear	0.25 (0.88)	0.23 (0.69)	0 (0.72)	0.29 (0.18)	0.28 (0.1)	-0.02 (0.1)	0.02	0.92885	0.31
472	CHGB_HLEEPGETQNAFLNER	CHGB	P05060	249	ADNI	MRM	0	2	0	1	1		Decrease	0 (1)	0 (0.22)	0.19 (0.23)	-0.01 (0.07)	-0.02 (0.05)	0.18 (0.04)	0.01	0.91319	-0.19	0.01851	-0.2	0.00344	0.03 (0.22)	0.02 (0.19)	-0.07 (0.26)	0.04 (0.05)	0 (0.03)	-0.08 (0.05)	0.04	0.50915	0.12	0.07735	0.08	0.15552	-0.05	0.1415		0.33 (0.16)	0.2 (0.23)	0.13 (0.24)	0.29 (0.06)	0.2 (0.03)	0.13 (0.03)	0.09	0.1683	0.16
473	CHI3L1	CHI3L1	P36222	249	ADNI	MRM	1	2	0	1	1			0 (0.99)	0.17 (1.03)	0.85 (0.91)	-0.04 (0.12)	0.13 (0.1)	0.87 (0.08)	-0.17	0.8139	-0.9	0	-0.73	0	0.05 (1.19)	0.12 (0.9)	0.39 (1.13)	0.07 (0.19)	0.05 (0.13)	0.35 (0.19)	0.02	0.94128	-0.28	0.29397	-0.3	0.18689	0.14	0.347		1.33 (0.71)	0.78 (0.96)	0.83 (0.85)	1.08 (0.25)	0.81 (0.11)	0.87 (0.13)	0.27	0.32452	0.21
474	CHI3L1	CHI3L1	P36222	310	EMIF-AD MBD	MRM	NA	1	0	1	1			0 (1)	0.07 (0.89)	1 (0.87)	0.15 (0.1)	0.07 (0.1)	0.92 (0.07)	0.07	0.61529	-0.78	0	-0.85	0	0.07 (0.88)	0.16 (0.91)	-0.03 (0.92)	0.16 (0.15)	0.15 (0.17)	0 (0.21)	0	0.99634	0.15	0.54084	0.15	0.57109	-0.08	0.5355		1.09 (0.91)	1.02 (0.88)	0.95 (0.85)	1.06 (0.19)	0.95 (0.1)	0.97 (0.11)	0.11	0.58953	0.09
475	CHI3L1	CHI3L1	P36222	125	ADNI	ELISA	0	2	0	1	1	Increase		0 (1)	-0.07 (1.12)	0.49 (1.22)	-0.13 (0.21)	-0.19 (0.18)	0.59 (0.16)	0.06	0.2694	-0.72	0.00718	-0.78	0.00149	-0.43 (0.84)	-0.07 (1.1)	0.83 (1.48)	-0.5 (0.33)	-0.25 (0.26)	0.71 (0.51)	-0.25	0.55696	-1.21	0.05193	-0.95	0.08855	0.6	0.0317	Increase linear	1.14 (1.12)	0.34 (1.2)	0.47 (1.32)	0.99 (0.4)	0.47 (0.2)	0.6 (0.35)	0.52	0.25756	0.39
476	CHI3L2	CHI3L2	Q15782	183	EMIF-AD MBD	MRM	NA		0	0	0			0 (1)	0.15 (0.99)	0.12 (0.86)	-0.01 (0.15)	0.15 (0.14)	0.13 (0.1)	-0.16	0.42615	-0.14	0.45703	0.02	0.90868	0.2 (0.85)	-0.22 (1.23)	0.6 (0.64)	0.22 (0.21)	-0.22 (0.22)	0.6 (0.27)	0.44	0.14873	-0.38	0.26061	-0.83	0.01952	0.16	0.4105		0.17 (1.14)	-0.11 (0.96)	0.35 (0.57)	0.16 (0.26)	-0.12 (0.14)	0.35 (0.15)	0.28	0.34247	-0.19
477	CHID1	CHID1	Q9BWS9	168	EMIF-AD MBD	MRM	NA		0	0	0			0 (1)	0.12 (1.3)	0.09 (0.89)	-0.15 (0.17)	0.11 (0.14)	0.18 (0.12)	-0.26	0.24569	-0.33	0.11955	-0.08	0.68764	0.43 (1.57)	-0.03 (1.04)	-0.23 (1)	0.23 (0.23)	-0.05 (0.24)	-0.2 (0.31)	0.27	0.41368	0.43	0.27507	0.15	0.69819	-0.18	0.4368		0.35 (1.06)	0.01 (0.94)	0.08 (0.77)	0.39 (0.31)	0.12 (0.17)	0.07 (0.19)	0.27	0.45498	0.32
478	CHIT1	CHIT1	Q13231	154	EMIF-AD MBD	MRM	NA		0	0	0			0 (1)	0.31 (0.96)	0.64 (1.31)	0.11 (0.2)	0.31 (0.19)	0.59 (0.13)	-0.2	0.46797	-0.48	0.05835	-0.27	0.24104	0.14 (0.58)	0.37 (1.26)	0.47 (0.88)	0.23 (0.34)	0.35 (0.31)	0.47 (0.43)	-0.11	0.80619	-0.24	0.66203	-0.13	0.81493	0.13	0.572		0.18 (0.97)	0.75 (1.53)	0.66 (1.18)	0.15 (0.41)	0.72 (0.21)	0.67 (0.2)	-0.57	0.21337	-0.52
479	CHL1	CHL1	O00533	310	EMIF-AD MBD	MRM	NA		-1	1	1	Decrease	Decrease	0 (1)	-0.57 (0.91)	0.3 (0.8)	-0.01 (0.1)	-0.57 (0.1)	0.31 (0.07)	0.56	0.0001	-0.32	0.01609	-0.88	0	-0.31 (0.76)	-0.63 (0.89)	-1.01 (1.1)	-0.35 (0.14)	-0.63 (0.17)	-1.01 (0.2)	0.28	0.20567	0.67	0.0068	0.39	0.1401	-0.33	0.0127	Decrease linear	0.49 (0.89)	0.38 (0.81)	0.15 (0.76)	0.51 (0.18)	0.39 (0.1)	0.14 (0.11)	0.12	0.56556	0.37
480	CHMP4A	CHMP4A	Q9BY43	125	EMIF-AD MBD	MRM	NA		0	-1	0			0 (1)	-0.16 (0.76)	-0.22 (0.56)	0.12 (0.14)	-0.17 (0.12)	-0.28 (0.1)	0.28	0.13945	0.39	0.03607	0.11	0.48069	-0.12 (0.95)	-0.16 (0.75)	-0.26 (0.19)	-0.07 (0.17)	-0.16 (0.17)	-0.21 (0.24)	0.09	0.713	0.14	0.63472	0.05	0.85982	-0.14	0.4671		0.03 (0.54)	-0.37 (0.46)	-0.12 (0.63)	0.01 (0.25)	-0.41 (0.13)	-0.12 (0.13)	0.42	0.13198	0.13
482	CHRD	CHRD	Q9H2X0	310	EMIF-AD MBD	MRM	NA		-1	1	1			0 (1)	-0.49 (0.95)	0.43 (0.83)	-0.05 (0.11)	-0.5 (0.1)	0.46 (0.08)	0.45	0.00246	-0.51	0.00021	-0.96	0	-0.29 (0.88)	-0.57 (0.91)	-0.81 (1.11)	-0.34 (0.15)	-0.56 (0.18)	-0.82 (0.21)	0.22	0.34692	0.47	0.06743	0.25	0.35783	-0.26	0.0643		0.51 (0.93)	0.48 (0.78)	0.33 (0.86)	0.54 (0.19)	0.52 (0.11)	0.32 (0.11)	0.02	0.91301	0.22
483	CHRDL1	CHRDL1	Q9BU40	310	EMIF-AD MBD	MRM	NA		0	0	0			0 (1)	-0.02 (1.19)	0.07 (1.07)	-0.11 (0.13)	-0.02 (0.12)	0.13 (0.09)	-0.09	0.62222	-0.24	0.13149	-0.16	0.30312	0 (1.28)	-0.23 (1.08)	0.22 (1.16)	-0.08 (0.19)	-0.22 (0.23)	0.2 (0.27)	0.14	0.64461	-0.28	0.39119	-0.42	0.23554	0.12	0.4822		-0.03 (0.85)	0.07 (1.09)	0.1 (1.12)	0 (0.24)	0.13 (0.14)	0.08 (0.14)	-0.13	0.62897	-0.08
486	CHST10	CHST10	O43529	310	EMIF-AD MBD	MRM	NA		-1	1	1	Decrease		0 (1)	-0.56 (0.88)	0.28 (0.97)	-0.02 (0.11)	-0.56 (0.11)	0.29 (0.08)	0.54	0.00058	-0.31	0.03252	-0.85	0	-0.33 (0.76)	-0.58 (0.74)	-1.01 (1.14)	-0.34 (0.16)	-0.58 (0.19)	-1.01 (0.23)	0.24	0.33815	0.67	0.01668	0.43	0.15065	-0.37	0.0032	Decrease linear	0.43 (0.94)	0.33 (0.92)	0.17 (1.02)	0.44 (0.2)	0.34 (0.12)	0.16 (0.12)	0.09	0.68459	0.27
487	CHST12	CHST12	Q9NRB3	101	EMIF-AD MBD	MRM	NA		0	0	0			0 (1)	0.36 (0.89)	0.46 (0.74)	0.01 (0.18)	0.36 (0.18)	0.45 (0.13)	-0.35	0.17658	-0.45	0.0644	-0.09	0.67742	0.37 (0.91)	0.5 (0.84)	-0.15 (1.28)	NA	NA	NA	NA	NA	NA	NA	NA	NA	-0.17	0.6021		0.34 (0.73)	0.64 (0.54)	0.24 (0.96)	NA	NA	NA	NA	NA	NA
488	CHST15	CHST15	Q7LFX5	245	EMIF-AD MBD	MRM	NA		0	0	1			0 (1)	-0.17 (0.7)	0.23 (0.83)	-0.02 (0.12)	-0.17 (0.11)	0.24 (0.08)	0.16	0.32419	-0.25	0.08616	-0.41	0.00281	-0.11 (0.65)	-0.38 (0.76)	0.04 (0.63)	-0.14 (0.17)	-0.38 (0.17)	0.02 (0.21)	0.24	0.31398	-0.16	0.53458	-0.4	0.13184	0.03	0.8043		0.27 (1.05)	0.28 (0.81)	0.16 (0.79)	0.28 (0.19)	0.3 (0.11)	0.15 (0.12)	-0.02	0.91429	0.13
491	CHST8	CHST8	Q9H2A9	216	EMIF-AD MBD	MRM	NA		0	0	0			0 (1)	-0.22 (0.78)	-0.11 (0.77)	0.05 (0.12)	-0.21 (0.11)	-0.14 (0.08)	0.26	0.1042	0.19	0.21558	-0.08	0.58645	-0.35 (0.76)	0.21 (0.57)	-0.45 (0.91)	-0.28 (0.14)	0.21 (0.19)	-0.46 (0.22)	-0.49	0.0388	0.18	0.48616	0.67	0.02102	-0.02	0.8786		-0.26 (0.72)	-0.09 (0.66)	-0.08 (0.88)	-0.29 (0.24)	-0.14 (0.11)	-0.07 (0.11)	-0.15	0.57524	-0.22
493	CKB	CKB	P12277	304	EMIF-AD MBD	MRM	NA		0	1	1			0 (1)	-0.14 (1.02)	0.92 (1.07)	0.06 (0.12)	-0.14 (0.12)	0.89 (0.09)	0.2	0.2363	-0.83	0	-1.03	0	-0.18 (0.9)	-0.17 (1.13)	-0.04 (1.16)	-0.16 (0.18)	-0.17 (0.22)	-0.02 (0.26)	0.01	0.98499	-0.14	0.65977	-0.14	0.67407	0.02	0.9039		0.67 (1.38)	1.04 (0.96)	0.88 (1.05)	0.67 (0.23)	1.02 (0.13)	0.89 (0.13)	-0.35	0.18488	-0.22
494	CKM	CKM	P06732	112	EMIF-AD MBD	MRM	NA		0	-1	2			0 (1)	-0.25 (0.99)	-0.64 (0.53)	0.04 (0.15)	-0.25 (0.15)	-0.67 (0.12)	0.29	0.17211	0.71	0.00059	0.42	0.03567	-0.4 (0.96)	0.36 (1.21)	-0.63 (0.49)	-0.39 (0.2)	0.38 (0.25)	-0.61 (0.25)	-0.77	0.01921	0.22	0.4893	0.99	0.0066	0.01	0.9758		-0.66 (0.3)	-0.49 (0.7)	-0.77 (0.36)	-0.68 (0.26)	-0.52 (0.16)	-0.76 (0.15)	-0.17	0.57469	0.07
496	CLASRP	CLASRP	Q8N2M8	294	EMIF-AD MBD	MRM	NA		-1	0	1	Decrease		0 (1)	-0.43 (0.82)	0.22 (0.73)	-0.01 (0.1)	-0.43 (0.1)	0.23 (0.07)	0.42	0.00265	-0.25	0.05196	-0.67	0	-0.23 (0.67)	-0.53 (1.03)	-0.71 (0.73)	-0.22 (0.13)	-0.53 (0.17)	-0.71 (0.18)	0.31	0.15794	0.49	0.0315	0.18	0.46252	-0.25	0.0416	Decrease linear	0.32 (0.79)	0.31 (0.69)	0.1 (0.74)	0.32 (0.17)	0.31 (0.1)	0.1 (0.1)	0.01	0.95919	0.22
497	CLEC11A	CLEC11A	Q9Y240	310	EMIF-AD MBD	MRM	NA		0	0	0		Increase	0 (1)	-0.05 (0.66)	0.07 (0.84)	-0.01 (0.1)	-0.05 (0.1)	0.08 (0.07)	0.04	0.79224	-0.09	0.47673	-0.13	0.29222	-0.11 (0.61)	-0.01 (0.7)	0.01 (0.72)	-0.11 (0.13)	-0.01 (0.16)	0.01 (0.19)	-0.1	0.63157	-0.12	0.60283	-0.02	0.93453	0.04	0.6353		-0.21 (0.9)	0.01 (0.84)	0.23 (0.81)	-0.21 (0.17)	0.02 (0.1)	0.23 (0.1)	-0.23	0.2389	-0.44
499	CLEC3B	CLEC3B	P05452	310	EMIF-AD MBD	MRM	NA		-1	1	1			0 (1)	-0.41 (1.04)	0.29 (0.86)	-0.01 (0.11)	-0.42 (0.11)	0.3 (0.08)	0.41	0.00868	-0.31	0.02892	-0.72	0	-0.2 (1.07)	-0.56 (1.01)	-0.64 (0.97)	-0.24 (0.16)	-0.55 (0.19)	-0.65 (0.22)	0.32	0.20317	0.41	0.13763	0.09	0.75191	-0.19	0.2167		0.3 (0.82)	0.32 (0.92)	0.26 (0.83)	0.32 (0.2)	0.34 (0.11)	0.25 (0.12)	-0.02	0.94062	0.07
501	CLIC1	CLIC1	O00299	286	EMIF-AD MBD	MRM	NA		0	0	0	Decrease		0 (1)	-0.15 (0.68)	-0.2 (0.86)	0 (0.1)	-0.15 (0.1)	-0.19 (0.08)	0.15	0.30968	0.19	0.16168	0.04	0.76009	0.02 (0.78)	-0.29 (0.58)	-0.29 (0.51)	0.01 (0.14)	-0.29 (0.17)	-0.29 (0.21)	0.31	0.17391	0.3	0.23591	-0.01	0.98125	-0.21	0.0488	Decrease linear	-0.28 (0.86)	-0.17 (0.86)	-0.19 (0.88)	-0.28 (0.19)	-0.18 (0.1)	-0.19 (0.11)	-0.1	0.65696	-0.09
502	CLIC4	CLIC4	Q9Y696	270	EMIF-AD MBD	MRM	NA		0	0	1			0 (1)	-0.06 (0.86)	0.36 (0.91)	0.16 (0.12)	-0.05 (0.11)	0.28 (0.08)	0.2	0.19769	-0.12	0.41034	-0.32	0.01624	-0.12 (0.88)	0.05 (0.85)	-0.07 (0.9)	-0.01 (0.16)	0.04 (0.19)	-0.03 (0.21)	-0.05	0.85347	0.03	0.9243	0.07	0.8019	-0.01	0.924		0.18 (0.97)	0.38 (0.91)	0.39 (0.91)	0.17 (0.21)	0.3 (0.12)	0.41 (0.12)	-0.13	0.59933	-0.24
505	CLMP	CLMP	Q9H6B4	115	EMIF-AD MBD	MRM	NA		0	0	0			0 (1)	-0.25 (0.88)	0.11 (0.73)	-0.04 (0.19)	-0.24 (0.15)	0.13 (0.1)	0.2	0.40861	-0.17	0.44335	-0.37	0.05063	0.03 (0.84)	-0.41 (0.85)	-0.82 (0.84)	0.01 (0.2)	-0.41 (0.27)	-0.77 (0.35)	0.41	0.23012	0.77	0.05655	0.36	0.41514	-0.41	0.073		0.22 (0.96)	0.08 (0.72)	0.1 (0.66)	0.22 (0.23)	0.08 (0.15)	0.11 (0.15)	0.14	0.602	0.11
506	CLN5	CLN5	O75503	310	EMIF-AD MBD	MRM	NA		0	0	0			0 (1)	0.08 (1.23)	-0.05 (1.02)	-0.17 (0.12)	0.06 (0.12)	0.05 (0.09)	-0.23	0.16558	-0.22	0.14692	0.01	0.9531	0.32 (1.39)	-0.11 (1.05)	-0.17 (1.05)	0.15 (0.18)	-0.09 (0.21)	-0.2 (0.26)	0.24	0.39093	0.35	0.26741	0.1	0.75369	-0.18	0.2976		0.08 (1.15)	-0.1 (1.04)	-0.04 (0.96)	0.17 (0.23)	-0.01 (0.13)	-0.07 (0.13)	0.17	0.51593	0.23
507	CLSTN1	CLSTN1	O94985	249	ADNI	MRM	1	2	-1	1	1		Decrease	0 (0.99)	-0.72 (1.21)	0.67 (1.01)	-0.02 (0.15)	-0.74 (0.12)	0.68 (0.1)	0.71	0.00019	-0.7	0.00011	-1.41	0	-0.51 (1.36)	-0.63 (1.1)	-1.09 (1.24)	-0.51 (0.23)	-0.66 (0.16)	-1.11 (0.23)	0.15	0.59952	0.6	0.07064	0.45	0.10788	-0.27	0.1463		1.07 (0.69)	0.84 (0.85)	0.29 (1.19)	0.92 (0.3)	0.87 (0.13)	0.31 (0.16)	0.06	0.86366	0.62
508	CLSTN1	CLSTN1	Q7Z3Y8	310	EMIF-AD MBD	MRM	NA	1	-1	1	1	Decrease		0 (1)	-0.36 (0.97)	0.36 (0.79)	-0.04 (0.1)	-0.37 (0.1)	0.38 (0.07)	0.33	0.02004	-0.42	0.00142	-0.76	0	-0.03 (0.79)	-0.52 (0.91)	-0.83 (1.17)	-0.09 (0.14)	-0.52 (0.17)	-0.83 (0.2)	0.42	0.05405	0.74	0.00275	0.31	0.23291	-0.38	0.0061	Decrease linear	0.49 (0.93)	0.42 (0.76)	0.24 (0.77)	0.53 (0.18)	0.45 (0.1)	0.23 (0.1)	0.08	0.69287	0.3
509	CLSTN2	CLSTN2	Q9H4D0	310	EMIF-AD MBD	MRM	NA		0	1	1	Decrease		0 (1)	-0.2 (0.98)	0.17 (0.77)	-0.06 (0.1)	-0.21 (0.1)	0.2 (0.07)	0.15	0.27669	-0.26	0.04605	-0.42	0.00086	0.12 (0.95)	-0.42 (0.76)	-0.56 (1.12)	0.04 (0.14)	-0.42 (0.17)	-0.57 (0.2)	0.46	0.03788	0.61	0.01216	0.16	0.54794	-0.34	0.0167	Decrease linear	0.34 (0.87)	0.18 (0.69)	0.1 (0.83)	0.38 (0.18)	0.22 (0.1)	0.08 (0.1)	0.16	0.42831	0.3
510	CLSTN3	CLSTN3	Q9BQT9	249	ADNI	MRM	1	2	-1	1	1	Decrease		0 (0.9)	-0.52 (0.89)	0.34 (0.74)	-0.01 (0.12)	-0.52 (0.09)	0.34 (0.08)	0.52	0.00061	-0.35	0.01368	-0.87	0	-0.33 (1.05)	-0.43 (0.76)	-0.88 (0.9)	-0.33 (0.18)	-0.44 (0.12)	-0.88 (0.17)	0.11	0.61868	0.55	0.02881	0.44	0.03702	-0.27	0.0632	Decrease non-linear	0.43 (0.75)	0.47 (0.66)	0.13 (0.83)	0.38 (0.23)	0.48 (0.1)	0.14 (0.12)	-0.1	0.70413	0.24
511	CLSTN3	CLSTN3	Q9BQT9	310	EMIF-AD MBD	MRM	NA	1	-1	1	1	Decrease	Decrease	0 (1)	-0.43 (1.03)	0.2 (0.87)	-0.11 (0.11)	-0.44 (0.1)	0.27 (0.08)	0.34	0.02478	-0.37	0.00667	-0.71	0	-0.04 (0.88)	-0.65 (0.86)	-0.93 (1.28)	-0.17 (0.15)	-0.64 (0.18)	-0.95 (0.21)	0.47	0.04457	0.78	0.00276	0.31	0.26194	-0.41	0.0044	Decrease linear	0.42 (1.04)	0.25 (0.76)	0.09 (0.91)	0.49 (0.19)	0.32 (0.11)	0.06 (0.11)	0.16	0.45406	0.43
512	CLU	CLU	P10909	249	ADNI	MRM	1	2	-1	1	1			0.01 (0.85)	-0.35 (1.06)	0.33 (1.04)	-0.03 (0.13)	-0.41 (0.1)	0.33 (0.08)	0.38	0.02072	-0.36	0.02153	-0.74	0	-0.41 (1.04)	-0.37 (1.18)	-0.25 (0.84)	-0.38 (0.21)	-0.47 (0.15)	-0.33 (0.21)	0.09	0.72471	-0.05	0.8717	-0.14	0.57949	0.04	0.8164		0.65 (0.78)	0.36 (0.86)	0.18 (1.31)	0.37 (0.28)	0.38 (0.12)	0.22 (0.15)	-0.01	0.9665	0.15
513	CLU	CLU	P10909	310	EMIF-AD MBD	MRM	NA	1	0	1	1			0 (1)	-0.24 (1.03)	0.35 (0.87)	0.01 (0.11)	-0.24 (0.11)	0.35 (0.08)	0.25	0.11159	-0.34	0.01772	-0.59	2e-05	-0.15 (1.04)	-0.4 (0.74)	-0.22 (1.34)	-0.13 (0.16)	-0.4 (0.19)	-0.22 (0.23)	0.26	0.29159	0.09	0.7444	-0.17	0.5596	-0.09	0.5627		0.26 (0.78)	0.4 (0.8)	0.33 (0.99)	0.25 (0.21)	0.39 (0.12)	0.33 (0.12)	-0.14	0.54701	-0.09
514	CLUH	CLUH	O75153	185	EMIF-AD MBD	MRM	NA		-1	0	1			0 (1)	-0.74 (0.95)	0.18 (0.88)	-0.05 (0.14)	-0.75 (0.14)	0.21 (0.1)	0.7	0.00076	-0.27	0.14592	-0.96	0	-0.43 (0.79)	-0.98 (1.08)	-0.92 (0.78)	-0.51 (0.21)	-0.99 (0.2)	-1.05 (0.36)	0.48	0.09814	0.54	0.19207	0.06	0.88575	-0.34	0.1032		-0.05 (0.93)	0.32 (0.87)	0.1 (0.87)	-0.02 (0.24)	0.38 (0.13)	0.08 (0.15)	-0.41	0.14168	-0.1
515	CLUL1	CLUL1	Q15846	267	EMIF-AD MBD	MRM	NA		0	0	1			0 (1)	-0.19 (0.85)	0.2 (0.94)	0.04 (0.12)	-0.19 (0.12)	0.18 (0.08)	0.23	0.16603	-0.13	0.38426	-0.36	0.0121	0.01 (0.73)	-0.46 (1.12)	-0.26 (0.52)	0.04 (0.16)	-0.46 (0.2)	-0.24 (0.26)	0.5	0.05792	0.28	0.35644	-0.22	0.51594	-0.21	0.135		0.27 (0.82)	0.34 (0.93)	-0.01 (0.97)	0.26 (0.21)	0.31 (0.11)	0 (0.13)	-0.05	0.82436	0.25
517	CNDP1	CNDP1	Q96KN2	249	ADNI	MRM	1	2	-1	1	1		Decrease	0 (0.96)	-0.49 (0.99)	0.47 (0.98)	-0.02 (0.14)	-0.52 (0.11)	0.47 (0.09)	0.5	0.00375	-0.49	0.00263	-1	0	-0.42 (1.07)	-0.49 (1.02)	-0.56 (0.89)	-0.41 (0.21)	-0.54 (0.15)	-0.6 (0.21)	0.13	0.61474	0.19	0.52648	0.06	0.81544	-0.07	0.6649		0.98 (0.53)	0.54 (0.92)	0.23 (1.09)	0.85 (0.28)	0.55 (0.12)	0.24 (0.15)	0.3	0.32015	0.61
518	CNDP1	CNDP1	Q96KN2	310	EMIF-AD MBD	MRM	NA	1	-1	0	1			0 (1)	-0.34 (0.95)	0.1 (0.81)	-0.06 (0.1)	-0.35 (0.1)	0.14 (0.08)	0.29	0.04695	-0.19	0.14765	-0.48	0.00016	-0.14 (0.84)	-0.39 (0.8)	-0.68 (1.27)	-0.2 (0.15)	-0.39 (0.17)	-0.69 (0.21)	0.18	0.41567	0.49	0.05315	0.3	0.26079	-0.24	0.0887		0.3 (1.12)	0.11 (0.71)	0.03 (0.8)	0.33 (0.19)	0.14 (0.11)	0.02 (0.11)	0.19	0.37582	0.31
522	CNR1	CNR1	P21554	255	EMIF-AD MBD	MRM	NA		-1	1	1	Decrease		0 (1)	-0.4 (0.97)	0.22 (0.65)	-0.04 (0.11)	-0.42 (0.11)	0.25 (0.08)	0.38	0.01049	-0.29	0.03735	-0.67	0	-0.19 (0.68)	-0.32 (1.09)	-0.89 (1.2)	-0.24 (0.14)	-0.35 (0.19)	-0.88 (0.19)	0.11	0.64274	0.64	0.00727	0.53	0.0495	-0.32	0.0341	Decrease linear	0.38 (0.71)	0.25 (0.6)	0.13 (0.69)	0.41 (0.18)	0.28 (0.1)	0.12 (0.11)	0.13	0.5413	0.29
523	CNTFR	CNTFR	P26992	310	EMIF-AD MBD	MRM	NA		-1	0	1	Decrease	Decrease	0 (1)	-0.43 (0.95)	0.2 (0.63)	-0.01 (0.1)	-0.43 (0.09)	0.21 (0.07)	0.42	0.00177	-0.22	0.07649	-0.64	0	-0.19 (0.9)	-0.51 (0.81)	-0.81 (1.14)	-0.21 (0.13)	-0.51 (0.15)	-0.81 (0.18)	0.29	0.14046	0.6	0.00671	0.31	0.19211	-0.32	0.0224	Decrease linear	0.33 (0.67)	0.26 (0.57)	0.08 (0.67)	0.34 (0.16)	0.27 (0.09)	0.08 (0.09)	0.07	0.69548	0.26
524	CNTN1	CNTN1	Q12860	249	ADNI	MRM	1	2	-1	1	1			0 (0.9)	-0.65 (1.13)	0.46 (1.03)	-0.03 (0.14)	-0.71 (0.11)	0.45 (0.09)	0.67	0.00017	-0.48	0.00416	-1.15	0	-0.49 (1.17)	-0.59 (1.18)	-0.92 (0.99)	-0.45 (0.22)	-0.69 (0.15)	-1.02 (0.22)	0.25	0.36823	0.57	0.07043	0.32	0.22028	-0.27	0.1087		0.71 (0.82)	0.57 (0.88)	0.2 (1.24)	0.46 (0.29)	0.58 (0.13)	0.23 (0.16)	-0.12	0.71479	0.23
525	CNTN1	CNTN1	Q12860	310	EMIF-AD MBD	MRM	NA	1	-1	1	1			0 (1)	-0.28 (0.82)	0.31 (0.69)	-0.01 (0.09)	-0.29 (0.09)	0.32 (0.07)	0.28	0.0353	-0.33	0.00693	-0.61	0	-0.1 (0.78)	-0.41 (0.81)	-0.5 (0.87)	-0.13 (0.12)	-0.4 (0.15)	-0.5 (0.18)	0.28	0.15416	0.38	0.08032	0.1	0.66305	-0.2	0.091		0.46 (0.76)	0.33 (0.67)	0.24 (0.68)	0.48 (0.16)	0.34 (0.09)	0.24 (0.09)	0.14	0.45758	0.24
526	CNTN2	CNTN2	Q02246	249	ADNI	MRM	1	2	0	1	1			0 (0.97)	-0.27 (1)	0.54 (1.05)	-0.03 (0.14)	-0.33 (0.11)	0.53 (0.09)	0.31	0.08347	-0.55	0.00117	-0.86	0	-0.14 (1.11)	-0.35 (1.04)	-0.24 (0.86)	-0.1 (0.22)	-0.45 (0.15)	-0.33 (0.22)	0.35	0.20602	0.23	0.45987	-0.11	0.66913	-0.07	0.6762		0.87 (0.58)	0.59 (0.92)	0.37 (1.31)	0.67 (0.29)	0.58 (0.13)	0.4 (0.16)	0.1	0.76202	0.27
527	CNTN2	CNTN2	Q02246	310	EMIF-AD MBD	MRM	NA	1	0	1	1			0 (1)	-0.2 (0.9)	0.24 (0.8)	-0.07 (0.1)	-0.21 (0.1)	0.29 (0.07)	0.14	0.33979	-0.36	0.00688	-0.49	9e-05	-0.05 (0.86)	-0.39 (0.84)	-0.25 (1.08)	-0.12 (0.14)	-0.38 (0.17)	-0.27 (0.2)	0.26	0.23766	0.15	0.5514	-0.12	0.66101	-0.12	0.3643		0.4 (0.87)	0.22 (0.72)	0.22 (0.87)	0.44 (0.18)	0.26 (0.1)	0.2 (0.11)	0.18	0.39293	0.24
528	CNTN3	CNTN3	Q9P232	310	EMIF-AD MBD	MRM	NA		-1	1	1	Decrease		0 (1)	-0.54 (1.04)	0.21 (0.87)	-0.04 (0.11)	-0.56 (0.11)	0.24 (0.08)	0.51	0.00079	-0.29	0.04059	-0.8	0	-0.3 (0.95)	-0.55 (1)	-1.04 (1.14)	-0.38 (0.15)	-0.54 (0.18)	-1.05 (0.22)	0.16	0.50703	0.67	0.01336	0.51	0.07856	-0.35	0.0227	Decrease linear	0.39 (0.97)	0.26 (0.83)	0.1 (0.88)	0.44 (0.2)	0.3 (0.11)	0.09 (0.11)	0.14	0.53615	0.35
529	CNTN4	CNTN4	Q8IWV2	310	EMIF-AD MBD	MRM	NA		-1	1	1	Decrease		0 (1)	-0.35 (0.91)	0.26 (0.81)	-0.04 (0.1)	-0.35 (0.1)	0.29 (0.07)	0.32	0.02837	-0.33	0.01433	-0.64	0	-0.08 (0.84)	-0.42 (0.93)	-0.79 (0.87)	-0.14 (0.14)	-0.42 (0.17)	-0.8 (0.2)	0.28	0.20263	0.66	0.00738	0.38	0.14921	-0.35	0.0077	Decrease linear	0.3 (0.88)	0.35 (0.79)	0.15 (0.8)	0.32 (0.18)	0.38 (0.1)	0.14 (0.11)	-0.06	0.7889	0.18
531	CNTN6	CNTN6	Q9UQ52	310	EMIF-AD MBD	MRM	NA		-1	0	1	Decrease		0 (1)	-0.49 (0.82)	0.08 (0.82)	-0.06 (0.1)	-0.5 (0.1)	0.12 (0.07)	0.44	0.00189	-0.18	0.17916	-0.62	0	-0.26 (0.71)	-0.74 (0.95)	-0.65 (0.76)	-0.35 (0.14)	-0.73 (0.16)	-0.67 (0.19)	0.38	0.07373	0.32	0.1768	-0.06	0.80515	-0.21	0.0775	Decrease non-linear	0.21 (1.41)	0.14 (0.69)	-0.02 (0.66)	0.25 (0.18)	0.19 (0.1)	-0.04 (0.1)	0.06	0.7507	0.29
532	CNTNAP2	CNTNAP2	Q9UHC6	249	ADNI	MRM	0	2	-1	1	1			0 (0.92)	-0.47 (1.18)	0.79 (0.92)	0 (0.14)	-0.45 (0.11)	0.81 (0.09)	0.45	0.01451	-0.81	0	-1.26	0	-0.19 (1.23)	-0.46 (1.2)	-0.77 (1.08)	-0.21 (0.23)	-0.43 (0.16)	-0.74 (0.23)	0.22	0.43913	0.53	0.10766	0.31	0.26434	-0.24	0.2026		0.86 (0.86)	0.9 (0.82)	0.61 (1.06)	0.85 (0.3)	0.93 (0.13)	0.61 (0.16)	-0.08	0.81371	0.24
533	CNTNAP2	CNTNAP2	Q9UHC6	310	EMIF-AD MBD	MRM	NA	1	-1	1	1	Decrease		0 (1)	-0.47 (0.89)	0.31 (0.82)	-0.06 (0.1)	-0.48 (0.1)	0.35 (0.07)	0.42	0.00321	-0.41	0.00188	-0.83	0	-0.23 (0.73)	-0.49 (0.96)	-0.93 (0.98)	-0.31 (0.14)	-0.48 (0.17)	-0.94 (0.2)	0.18	0.42203	0.63	0.01028	0.45	0.08368	-0.32	0.0126	Decrease linear	0.47 (1)	0.36 (0.79)	0.2 (0.79)	0.52 (0.18)	0.39 (0.1)	0.19 (0.1)	0.12	0.54823	0.33
534	CNTNAP2_VDNAPDQQNSHPDLAQEEIR	CNTNAP2	Q9UHC6	249	ADNI	MRM	0	2	-1	0	1			0 (1)	-1.37 (3.99)	-0.08 (2.05)	-0.01 (0.39)	-1.29 (0.3)	-0.01 (0.25)	1.28	0.00926	0	0.99282	-1.28	0.0011	-0.48 (0.82)	-1.95 (4.96)	-1.03 (3.5)	-0.56 (0.66)	-1.84 (0.46)	-0.88 (0.65)	1.28	0.11543	0.32	0.73416	-0.96	0.22208	-0.13	0.8401		-1.05 (4.24)	0.19 (0.65)	-0.2 (2.46)	-1.15 (0.86)	0.33 (0.37)	-0.18 (0.46)	-1.47	0.11791	-0.96
537	CNTNAP4	CNTNAP4	Q9C0A0	310	EMIF-AD MBD	MRM	NA		0	1	1			0 (1)	-0.28 (1.01)	0.19 (0.78)	-0.09 (0.1)	-0.29 (0.1)	0.25 (0.07)	0.2	0.17193	-0.34	0.01156	-0.54	3e-05	-0.04 (0.92)	-0.41 (0.88)	-0.61 (1.26)	-0.14 (0.15)	-0.4 (0.17)	-0.63 (0.21)	0.27	0.2424	0.49	0.05204	0.23	0.40395	-0.26	0.0771		0.3 (0.94)	0.19 (0.77)	0.15 (0.75)	0.34 (0.19)	0.25 (0.11)	0.13 (0.11)	0.09	0.67292	0.21
538	CNTNAP5	CNTNAP5	Q8WYK1	219	EMIF-AD MBD	MRM	NA		0	0	1	Decrease		0 (1)	-0.12 (0.6)	0.14 (0.68)	0.02 (0.11)	-0.12 (0.1)	0.13 (0.07)	0.14	0.35458	-0.11	0.43812	-0.24	0.04469	0.06 (0.48)	-0.13 (0.54)	-0.44 (0.75)	0.07 (0.13)	-0.13 (0.15)	-0.43 (0.17)	0.21	0.2915	0.51	0.01588	0.3	0.17776	-0.27	0.0053	Decrease linear	0.19 (0.52)	0.28 (0.59)	-0.03 (0.78)	0.18 (0.16)	0.27 (0.09)	-0.03 (0.09)	-0.09	0.62854	0.21
540	COCH	COCH	O43405	249	ADNI	MRM	0	2	-1	1	1			0 (1)	-0.34 (0.8)	0.27 (0.72)	-0.02 (0.11)	-0.38 (0.08)	0.27 (0.07)	0.36	0.00989	-0.29	0.02848	-0.65	0	-0.53 (0.69)	-0.26 (0.89)	-0.34 (0.68)	-0.51 (0.16)	-0.3 (0.11)	-0.38 (0.16)	-0.21	0.29553	-0.13	0.56351	0.08	0.69431	0.02	0.8654		0.6 (0.6)	0.23 (0.68)	0.25 (0.8)	0.46 (0.21)	0.23 (0.09)	0.26 (0.11)	0.23	0.32007	0.2
541	COCH	COCH	O43405	310	EMIF-AD MBD	MRM	NA	1	-1	0	1			0 (1)	-0.27 (0.96)	0.28 (0.91)	0.04 (0.11)	-0.27 (0.11)	0.26 (0.08)	0.31	0.04271	-0.22	0.12004	-0.54	9e-05	-0.33 (0.83)	-0.23 (0.98)	-0.22 (1.23)	-0.32 (0.16)	-0.23 (0.19)	-0.22 (0.23)	-0.09	0.71617	-0.11	0.70342	-0.01	0.96062	0.05	0.7128		0.34 (0.88)	0.32 (0.93)	0.23 (0.9)	0.33 (0.2)	0.32 (0.12)	0.23 (0.12)	0.02	0.9467	0.1
543	COL12A1	COL12A1	Q99715	289	EMIF-AD MBD	MRM	NA		0	0	0			0 (1)	-0.19 (0.99)	-0.28 (1.05)	-0.04 (0.13)	-0.19 (0.12)	-0.26 (0.09)	0.15	0.4029	0.22	0.16589	0.08	0.61375	-0.31 (1.07)	-0.04 (1.1)	-0.15 (0.62)	-0.35 (0.18)	-0.04 (0.21)	-0.16 (0.26)	-0.31	0.26509	-0.19	0.53957	0.12	0.72255	0.13	0.3687		-0.41 (1.06)	-0.35 (0.84)	-0.17 (1.22)	-0.41 (0.23)	-0.32 (0.14)	-0.18 (0.13)	-0.08	0.76175	-0.22
544	COL14A1	COL14A1	Q05707	289	EMIF-AD MBD	MRM	NA		0	0	0			0 (1)	0.03 (1.03)	0.11 (0.94)	-0.09 (0.12)	0.02 (0.11)	0.17 (0.09)	-0.11	0.50038	-0.26	0.09131	-0.15	0.30905	0.14 (1.06)	0.13 (0.72)	-0.29 (1.29)	0.03 (0.17)	0.12 (0.21)	-0.31 (0.23)	-0.09	0.72489	0.34	0.24606	0.43	0.16701	-0.13	0.4082		0.35 (1.07)	0.07 (0.93)	0.07 (0.92)	0.41 (0.22)	0.14 (0.13)	0.04 (0.13)	0.26	0.29391	0.36
545	COL15A1	COL15A1	P39059	293	EMIF-AD MBD	MRM	NA		1	1	0			0 (1)	0.3 (0.85)	0.26 (0.93)	-0.07 (0.11)	0.3 (0.11)	0.29 (0.08)	-0.37	0.01951	-0.36	0.01207	0.01	0.9631	0.42 (0.84)	0.15 (0.97)	0.3 (0.67)	0.39 (0.16)	0.15 (0.19)	0.27 (0.25)	0.24	0.33427	0.12	0.69932	-0.12	0.69593	-0.08	0.5457		0.17 (0.9)	0.2 (0.93)	0.35 (0.95)	0.19 (0.2)	0.23 (0.12)	0.34 (0.12)	-0.04	0.8551	-0.15
547	COL18A1	COL18A1	P39060	310	EMIF-AD MBD	MRM	NA		0	0	1			0 (1)	-0.12 (0.87)	0.26 (0.85)	0.06 (0.1)	-0.12 (0.1)	0.23 (0.08)	0.18	0.21966	-0.17	0.21202	-0.35	0.00665	-0.09 (0.93)	-0.15 (0.87)	-0.12 (0.76)	-0.05 (0.15)	-0.16 (0.17)	-0.11 (0.21)	0.11	0.63872	0.06	0.82474	-0.05	0.85068	-0.01	0.931		0.46 (0.81)	0.28 (0.8)	0.18 (0.9)	0.45 (0.19)	0.24 (0.11)	0.19 (0.11)	0.21	0.33013	0.26
548	COL1A1	COL1A1	P02452	310	EMIF-AD MBD	MRM	NA		0	0	0			0 (1)	-0.11 (0.91)	0.07 (0.88)	-0.05 (0.11)	-0.11 (0.1)	0.1 (0.08)	0.06	0.6696	-0.14	0.30041	-0.21	0.11381	-0.06 (1.05)	-0.14 (0.83)	-0.16 (0.73)	-0.11 (0.15)	-0.13 (0.18)	-0.17 (0.22)	0.02	0.92002	0.07	0.80591	0.04	0.88492	-0.03	0.8034		0.04 (0.91)	0.04 (0.88)	0.12 (0.87)	0.06 (0.2)	0.07 (0.11)	0.11 (0.11)	-0.01	0.95632	-0.05
549	COL1A2	COL1A2	P08123	310	EMIF-AD MBD	MRM	NA		0	0	0			0 (1)	-0.08 (0.91)	-0.03 (0.88)	-0.09 (0.11)	-0.09 (0.1)	0.02 (0.08)	0	0.99275	-0.11	0.42214	-0.11	0.40234	0 (1.06)	-0.21 (0.8)	-0.06 (0.73)	-0.09 (0.15)	-0.21 (0.18)	-0.08 (0.21)	0.12	0.61909	0	0.98661	-0.12	0.66457	-0.01	0.9538		-0.06 (0.9)	-0.06 (0.89)	0.01 (0.87)	-0.02 (0.19)	0 (0.11)	-0.01 (0.11)	-0.02	0.93546	-0.01
550	COL21A1	COL21A1	Q96P44	98	EMIF-AD MBD	MRM	NA		0	0	0			0 (1)	-0.72 (0.88)	-0.74 (1.26)	-0.1 (0.26)	-0.75 (0.23)	-0.69 (0.16)	0.66	0.05907	0.6	0.05858	-0.06	0.82973	-0.71 (0.7)	-0.67 (1.18)	-0.78 (0.88)	-0.86 (0.42)	-0.63 (0.45)	-0.81 (0.42)	-0.23	0.71195	-0.05	0.92724	0.18	0.77325	0	0.9821		-0.42 (1.7)	-0.96 (0.67)	-0.68 (1.43)	-0.43 (0.45)	-0.87 (0.29)	-0.7 (0.22)	0.44	0.41168	0.27
551	COL28A1	COL28A1	Q2UY09	230	EMIF-AD MBD	MRM	NA		0	0	0			0 (1)	-0.06 (0.79)	-0.2 (0.84)	-0.03 (0.12)	-0.05 (0.11)	-0.19 (0.09)	0.02	0.87788	0.16	0.30426	0.13	0.34801	-0.04 (0.78)	-0.11 (0.69)	-0.05 (0.95)	-0.06 (0.15)	-0.07 (0.21)	-0.06 (0.22)	0.02	0.94623	0	0.98694	-0.01	0.96596	-0.01	0.9539		-0.25 (0.87)	-0.21 (0.78)	-0.17 (0.9)	-0.25 (0.19)	-0.19 (0.12)	-0.18 (0.13)	-0.06	0.80158	-0.07
552	COL2A1	COL2A1	P02458	109	EMIF-AD MBD	MRM	NA		0	0	0			0 (1)	-0.02 (1.29)	0.05 (1.07)	0 (0.23)	-0.05 (0.22)	0.07 (0.15)	0.05	0.86736	-0.07	0.8206	-0.12	0.65856	-0.21 (0.77)	0.04 (1.64)	0.26 (1.64)	-0.26 (0.37)	0.05 (0.37)	0.13 (0.54)	-0.3	0.5673	-0.39	0.55203	-0.08	0.90077	0.15	0.6811		0.02 (0.99)	0.06 (1.06)	0.05 (1.15)	0.11 (0.4)	0.08 (0.25)	0.05 (0.24)	0.04	0.93966	0.06
553	COL3A1	COL3A1	P02461	310	EMIF-AD MBD	MRM	NA		0	0	0			0 (1)	-0.1 (0.86)	-0.03 (0.89)	-0.07 (0.11)	-0.11 (0.1)	0.01 (0.08)	0.04	0.76658	-0.08	0.54856	-0.12	0.33015	0.04 (0.93)	-0.25 (0.88)	-0.2 (0.66)	-0.04 (0.15)	-0.24 (0.18)	-0.21 (0.21)	0.2	0.38437	0.17	0.50841	-0.03	0.90852	-0.09	0.4715		-0.01 (1.07)	-0.02 (0.84)	-0.04 (0.88)	0.03 (0.19)	0.02 (0.11)	-0.05 (0.11)	0.01	0.9701	0.08
554	COL4A1	COL4A1	P02462	226	EMIF-AD MBD	MRM	NA		0	0	0			0 (1)	-0.19 (0.92)	-0.09 (0.94)	0.01 (0.13)	-0.19 (0.13)	-0.09 (0.09)	0.2	0.285	0.1	0.5358	-0.09	0.56864	-0.13 (0.75)	0.11 (1.05)	-0.85 (0.82)	-0.17 (0.19)	0.1 (0.23)	-0.86 (0.29)	-0.27	0.36333	0.69	0.05178	0.96	0.01061	-0.25	0.1222		0.04 (0.98)	-0.14 (0.8)	-0.07 (1.09)	0.07 (0.23)	-0.11 (0.13)	-0.08 (0.14)	0.18	0.48559	0.14
555	COL4A2	COL4A2	P08572	282	EMIF-AD MBD	MRM	NA		0	0	0			0 (1)	-0.12 (0.96)	0.07 (0.97)	0.04 (0.12)	-0.12 (0.12)	0.05 (0.09)	0.15	0.35847	-0.02	0.9055	-0.17	0.23192	-0.1 (0.8)	-0.07 (1.11)	-0.23 (1.11)	-0.09 (0.17)	-0.07 (0.2)	-0.23 (0.25)	-0.02	0.9399	0.13	0.65537	0.15	0.62977	-0.06	0.6943		-0.21 (1.24)	0.36 (0.86)	-0.17 (0.94)	-0.22 (0.23)	0.36 (0.12)	-0.17 (0.13)	-0.57	0.02956	-0.04
556	COL4A5	COL4A5	P29400	125	EMIF-AD MBD	MRM	NA		0	0	0			0 (1)	-0.17 (1.01)	-0.33 (0.88)	-0.09 (0.17)	-0.19 (0.17)	-0.27 (0.13)	0.1	0.67335	0.18	0.4397	0.08	0.71543	-0.23 (0.93)	0.11 (1.14)	-0.61 (0.93)	-0.29 (0.24)	0.17 (0.28)	-0.54 (0.41)	-0.46	0.20678	0.25	0.59862	0.71	0.15068	-0.04	0.891		-0.3 (0.95)	-0.38 (0.98)	-0.26 (0.68)	-0.34 (0.28)	-0.39 (0.17)	-0.24 (0.21)	0.04	0.89126	-0.1
557	COL5A1	COL5A1	P20908	221	EMIF-AD MBD	MRM	NA		0	0	2			0 (1)	0.19 (0.72)	-0.15 (1.08)	0.07 (0.14)	0.19 (0.13)	-0.19 (0.1)	-0.12	0.52626	0.26	0.14908	0.38	0.02087	0.3 (0.64)	0.11 (0.91)	0.04 (0.47)	0.37 (0.19)	0.11 (0.22)	0.05 (0.29)	0.26	0.38997	0.32	0.37127	0.06	0.87094	-0.14	0.2672		-0.22 (1.29)	-0.14 (1.07)	-0.12 (1.03)	-0.23 (0.25)	-0.18 (0.14)	-0.13 (0.15)	-0.05	0.86358	-0.1
558	COL6A1	COL6A1	P12109	310	EMIF-AD MBD	MRM	NA		0	1	1			0 (1)	-0.27 (0.95)	0.24 (0.81)	-0.06 (0.1)	-0.29 (0.1)	0.28 (0.07)	0.22	0.12062	-0.34	0.00979	-0.57	1e-05	-0.1 (0.98)	-0.34 (0.83)	-0.55 (1.04)	-0.18 (0.14)	-0.33 (0.17)	-0.56 (0.21)	0.16	0.48842	0.39	0.12483	0.23	0.39442	-0.21	0.1383		0.32 (0.95)	0.29 (0.75)	0.16 (0.83)	0.36 (0.19)	0.33 (0.1)	0.15 (0.11)	0.03	0.88644	0.21
559	COL6A2	COL6A2	P12110	302	EMIF-AD MBD	MRM	NA		0	0	0			0 (1)	-0.06 (0.82)	0.07 (0.97)	0 (0.11)	-0.07 (0.11)	0.07 (0.08)	0.06	0.68457	-0.07	0.61296	-0.14	0.30932	-0.12 (0.82)	0.2 (0.81)	-0.3 (0.79)	-0.14 (0.16)	0.2 (0.19)	-0.3 (0.22)	-0.33	0.17653	0.16	0.54872	0.5	0.09049	-0.02	0.8591		-0.09 (0.8)	0.06 (0.81)	0.14 (1.17)	-0.08 (0.21)	0.06 (0.12)	0.14 (0.12)	-0.14	0.55129	-0.22
560	COL6A3	COL6A3	P12111	310	EMIF-AD MBD	MRM	NA		0	0	1			0 (1)	-0.02 (0.94)	0.3 (0.86)	0.04 (0.11)	-0.01 (0.1)	0.28 (0.08)	0.05	0.72623	-0.24	0.08141	-0.29	0.02523	-0.05 (1.11)	0.06 (0.85)	-0.06 (0.65)	-0.02 (0.15)	0.06 (0.18)	-0.06 (0.22)	-0.08	0.73106	0.04	0.89076	0.12	0.67669	-0.01	0.9462		0.2 (0.91)	0.36 (0.81)	0.27 (0.9)	0.19 (0.2)	0.35 (0.11)	0.28 (0.11)	-0.16	0.47546	-0.09
562	COLEC12	COLEC12	Q5KU26	310	EMIF-AD MBD	MRM	NA		-1	1	1			0 (1)	-0.25 (0.89)	0.5 (0.71)	0.06 (0.1)	-0.25 (0.09)	0.48 (0.07)	0.31	0.02228	-0.42	0.00088	-0.73	0	-0.11 (0.98)	-0.34 (0.81)	-0.42 (0.79)	-0.08 (0.13)	-0.35 (0.16)	-0.41 (0.19)	0.27	0.19924	0.33	0.1561	0.06	0.80692	-0.18	0.1769		0.55 (0.74)	0.55 (0.65)	0.44 (0.77)	0.55 (0.17)	0.53 (0.1)	0.45 (0.1)	0.02	0.92369	0.1
563	COMP	COMP	P49747	310	EMIF-AD MBD	MRM	NA		0	0	0			0 (1)	-0.01 (1.15)	0.18 (1.18)	0.29 (0.12)	0 (0.12)	0.02 (0.09)	0.29	0.09515	0.27	0.08363	-0.01	0.93027	-0.33 (1.01)	0.38 (1.28)	0.11 (1.11)	-0.06 (0.18)	0.36 (0.22)	0.18 (0.26)	-0.42	0.13763	-0.24	0.4503	0.19	0.58461	0.17	0.2655		-0.04 (1.22)	0.3 (1.16)	0.13 (1.2)	-0.15 (0.23)	0.13 (0.13)	0.19 (0.14)	-0.28	0.2978	-0.34
566	COTL1	COTL1	Q14019	310	EMIF-AD MBD	MRM	NA		-1	1	1			0 (1)	-0.32 (0.92)	0.44 (0.8)	-0.04 (0.1)	-0.33 (0.1)	0.47 (0.07)	0.29	0.04487	-0.5	0.00015	-0.79	0	-0.19 (1.14)	-0.48 (0.54)	-0.36 (0.8)	-0.23 (0.14)	-0.47 (0.17)	-0.36 (0.2)	0.24	0.28829	0.12	0.62314	-0.12	0.66328	-0.1	0.4876		0.47 (0.95)	0.46 (0.74)	0.42 (0.81)	0.5 (0.18)	0.47 (0.1)	0.41 (0.11)	0.02	0.91926	0.08
568	CP	CP	P00450	249	ADNI	MRM	1	2	0	0	0			0 (0.99)	-0.16 (0.99)	0.04 (0.96)	-0.02 (0.13)	-0.19 (0.1)	0.04 (0.09)	0.17	0.32007	-0.06	0.69112	-0.23	0.08607	-0.26 (0.93)	-0.18 (0.98)	0 (1.08)	-0.24 (0.21)	-0.25 (0.15)	-0.06 (0.21)	0.01	0.97885	-0.18	0.53627	-0.19	0.44671	0.14	0.3703		0.33 (1.1)	-0.03 (0.84)	0.07 (1.1)	0.16 (0.28)	-0.03 (0.12)	0.09 (0.15)	0.19	0.53691	0.07
569	CP	CP	P00450	310	EMIF-AD MBD	MRM	NA	1	1	0	2			0 (1)	0.52 (1.11)	-0.07 (0.99)	-0.01 (0.12)	0.51 (0.12)	-0.06 (0.09)	-0.52	0.00188	0.05	0.73404	0.57	9e-05	0.33 (0.95)	0.61 (1.09)	0.77 (1.42)	0.3 (0.18)	0.61 (0.21)	0.77 (0.25)	-0.31	0.26249	-0.47	0.12119	-0.16	0.61307	0.25	0.1186		-0.15 (1.16)	-0.14 (0.91)	0.02 (1.01)	-0.12 (0.22)	-0.13 (0.13)	0.02 (0.13)	0	0.98821	-0.15
570	CPAMD8	CPAMD8	Q8IZJ3	163	EMIF-AD MBD	MRM	NA		0	0	0			0 (1)	0.3 (1.19)	-0.17 (0.98)	-0.09 (0.16)	0.29 (0.17)	-0.12 (0.12)	-0.38	0.10549	0.02	0.90751	0.4	0.05265	0.27 (1.3)	0.35 (1.26)	0.31 (0.88)	0.2 (0.26)	0.32 (0.29)	0.31 (0.4)	-0.12	0.74785	-0.11	0.81414	0.01	0.98402	0.02	0.9531		0.05 (1.05)	-0.33 (1.01)	-0.07 (0.92)	0.07 (0.28)	-0.28 (0.18)	-0.09 (0.2)	0.36	0.28381	0.16
571	CPB1	CPB1	P15086	228	EMIF-AD MBD	MRM	NA		0	0	0			0 (1)	0.05 (0.88)	0.38 (0.89)	0.06 (0.12)	0.05 (0.12)	0.34 (0.09)	0	0.98562	-0.29	0.07711	-0.29	0.05304	-0.06 (0.82)	0.3 (0.93)	-0.08 (0.92)	-0.01 (0.17)	0.29 (0.2)	-0.05 (0.25)	-0.3	0.24418	0.03	0.90794	0.34	0.28829	0.02	0.8835		0.64 (1.25)	0.31 (0.8)	0.37 (0.86)	0.63 (0.25)	0.28 (0.13)	0.36 (0.13)	0.34	0.22142	0.26
572	CPB2	CPB2	Q96IY4	310	EMIF-AD MBD	MRM	NA		0	-1	2	Increase		0 (1)	0.21 (0.94)	-0.35 (0.95)	-0.02 (0.11)	0.21 (0.11)	-0.34 (0.08)	-0.23	0.1409	0.32	0.02456	0.55	6e-05	-0.14 (0.83)	0.53 (0.82)	0.47 (1.09)	-0.17 (0.16)	0.53 (0.19)	0.45 (0.22)	-0.7	0.00463	-0.63	0.02259	0.08	0.79254	0.35	0.0097	Increase linear	-0.62 (1.07)	-0.38 (0.77)	-0.23 (1.06)	-0.62 (0.2)	-0.35 (0.11)	-0.25 (0.12)	-0.27	0.24282	-0.37
573	CPD	CPD	O75976	215	EMIF-AD MBD	MRM	NA		0	1	1		Decrease	0 (1)	-0.25 (1.05)	0.32 (0.94)	-0.11 (0.14)	-0.26 (0.13)	0.38 (0.1)	0.15	0.43052	-0.49	0.00529	-0.64	0.00013	-0.2 (1)	-0.42 (0.91)	-0.17 (1.32)	-0.32 (0.19)	-0.35 (0.26)	-0.2 (0.27)	0.03	0.93688	-0.13	0.70238	-0.15	0.68332	0.02	0.8959		0.7 (0.78)	0.44 (0.92)	0.11 (0.95)	0.73 (0.27)	0.51 (0.14)	0.09 (0.14)	0.22	0.47642	0.64
574	CPE	CPE	P16870	310	EMIF-AD MBD	MRM	NA		0	1	1			0 (1)	-0.22 (0.92)	0.19 (0.77)	-0.1 (0.1)	-0.23 (0.1)	0.25 (0.07)	0.12	0.36839	-0.35	0.00596	-0.48	9e-05	0.05 (0.9)	-0.49 (0.72)	-0.4 (1.1)	-0.05 (0.14)	-0.48 (0.16)	-0.42 (0.19)	0.42	0.04762	0.37	0.12148	-0.06	0.8223	-0.22	0.0967		0.29 (0.81)	0.16 (0.75)	0.19 (0.79)	0.34 (0.17)	0.22 (0.1)	0.17 (0.1)	0.12	0.54271	0.17
576	CPM	CPM	P14384	139	EMIF-AD MBD	MRM	NA		0	-1	0			0 (1)	-0.59 (1.09)	-0.64 (0.97)	-0.08 (0.19)	-0.57 (0.17)	-0.6 (0.13)	0.49	0.05398	0.52	0.02859	0.03	0.88183	-0.72 (1.15)	-0.32 (0.76)	-0.58 (1.29)	-0.76 (0.24)	-0.28 (0.35)	-0.57 (0.34)	-0.48	0.27123	-0.19	0.65675	0.29	0.54995	0.16	0.5076		-0.32 (1.03)	-0.88 (0.97)	-0.39 (0.9)	-0.3 (0.36)	-0.85 (0.17)	-0.41 (0.21)	0.56	0.16412	0.12
577	CPN1	CPN1	P15169	224	EMIF-AD MBD	MRM	NA		0	0	0			0 (1)	0.05 (0.92)	-0.12 (0.91)	-0.05 (0.13)	0.05 (0.12)	-0.1 (0.1)	-0.09	0.59684	0.05	0.76157	0.15	0.33843	-0.16 (1.07)	0.25 (0.84)	0.18 (0.64)	-0.2 (0.18)	0.26 (0.21)	0.17 (0.24)	-0.46	0.0987	-0.37	0.21107	0.08	0.78993	0.14	0.3533		0.01 (0.97)	-0.2 (0.71)	-0.08 (1.08)	0.03 (0.24)	-0.19 (0.14)	-0.09 (0.15)	0.22	0.42391	0.12
578	CPN2	CPN2	P22792	310	EMIF-AD MBD	MRM	NA		0	0	0			0 (1)	0.15 (0.95)	-0.09 (0.81)	-0.03 (0.11)	0.15 (0.1)	-0.07 (0.08)	-0.18	0.2219	0.04	0.79028	0.22	0.09287	0 (1.11)	0.2 (0.88)	0.38 (0.62)	-0.03 (0.15)	0.2 (0.18)	0.37 (0.21)	-0.23	0.32355	-0.4	0.11802	-0.17	0.52831	0.16	0.2553		-0.08 (0.94)	-0.2 (0.66)	0.03 (0.91)	-0.07 (0.19)	-0.18 (0.11)	0.02 (0.11)	0.11	0.62163	-0.09
580	CPQ	CPQ	Q9Y646	310	EMIF-AD MBD	MRM	NA		0	0	0			0 (1)	-0.12 (0.88)	0.05 (0.81)	-0.08 (0.1)	-0.13 (0.1)	0.1 (0.07)	0.05	0.72582	-0.18	0.17619	-0.23	0.0675	0 (0.94)	-0.19 (0.9)	-0.29 (0.73)	-0.07 (0.14)	-0.18 (0.17)	-0.31 (0.2)	0.11	0.6109	0.24	0.33409	0.13	0.63571	-0.1	0.4324		0.11 (0.87)	0.03 (0.8)	0.06 (0.81)	0.14 (0.18)	0.07 (0.1)	0.04 (0.11)	0.07	0.73628	0.1
581	CPVL	CPVL	Q9H3G5	310	EMIF-AD MBD	MRM	NA		0	0	0	Decrease		0 (1)	0.09 (1.3)	-0.12 (0.96)	-0.1 (0.12)	0.07 (0.12)	-0.06 (0.09)	-0.17	0.30345	-0.04	0.77402	0.13	0.37992	0.38 (1.21)	0.02 (0.99)	-0.44 (1.7)	0.23 (0.18)	0.03 (0.21)	-0.46 (0.25)	0.2	0.46748	0.69	0.02611	0.49	0.14118	-0.32	0.0844	Decrease non-linear	-0.22 (0.97)	-0.08 (0.87)	-0.12 (1.06)	-0.15 (0.23)	0 (0.13)	-0.15 (0.13)	-0.15	0.56313	0
583	CPXM2	CPXM2	Q8N436	142	EMIF-AD MBD	MRM	NA		0	0	0			0 (1)	0.13 (1.21)	-0.22 (1.12)	-0.05 (0.19)	0.12 (0.19)	-0.19 (0.14)	-0.17	0.52424	0.14	0.58526	0.31	0.20657	0.01 (0.86)	0.51 (1.73)	-0.3 (0.67)	-0.03 (0.29)	0.5 (0.34)	-0.29 (0.48)	-0.52	0.23868	0.26	0.64689	0.78	0.18585	0.02	0.9396		-0.37 (1.04)	-0.22 (0.89)	-0.15 (1.4)	-0.36 (0.35)	-0.19 (0.22)	-0.16 (0.23)	-0.17	0.6841	-0.2
584	CRABP1	CRABP1	P29762	196	EMIF-AD MBD	MRM	NA		0	0	0			0 (1)	0 (0.89)	-0.02 (0.88)	0.02 (0.13)	-0.01 (0.14)	-0.03 (0.1)	0.03	0.86816	0.05	0.757	0.02	0.89935	0.03 (1.05)	0.04 (0.59)	-0.13 (0.86)	0.04 (0.19)	0.04 (0.25)	-0.11 (0.28)	0	0.98807	0.15	0.64901	0.15	0.69126	-0.08	0.6088		-0.2 (0.95)	0.16 (1.02)	-0.15 (0.64)	-0.21 (0.25)	0.14 (0.14)	-0.14 (0.14)	-0.34	0.22326	-0.07
585	CRB2	CRB2	Q5IJ48	118	EMIF-AD MBD	MRM	NA		0	0	0		Increase	0 (1)	-0.2 (0.78)	-0.09 (0.89)	0 (0.17)	-0.2 (0.17)	-0.09 (0.12)	0.2	0.40236	0.09	0.67193	-0.11	0.59038	-0.37 (0.67)	0.01 (1.09)	-0.13 (0.38)	-0.49 (0.25)	0.04 (0.29)	-0.13 (0.34)	-0.53	0.17803	-0.36	0.40432	0.17	0.7061	0.08	0.6897		-0.23 (1.01)	-0.34 (0.67)	0.21 (0.97)	-0.23 (0.27)	-0.29 (0.17)	0.21 (0.17)	0.06	0.84419	-0.44
588	CRELD1	CRELD1	Q96HD1	278	EMIF-AD MBD	MRM	NA		0	1	1	Decrease		0 (1)	-0.33 (0.82)	0.31 (0.89)	-0.05 (0.11)	-0.34 (0.11)	0.34 (0.08)	0.29	0.06305	-0.39	0.00804	-0.68	0	-0.1 (0.58)	-0.5 (0.88)	-0.62 (1.09)	-0.17 (0.15)	-0.49 (0.18)	-0.62 (0.23)	0.32	0.18111	0.45	0.10449	0.13	0.66287	-0.26	0.0453	Decrease linear	0.39 (0.81)	0.35 (0.96)	0.24 (0.85)	0.43 (0.21)	0.37 (0.11)	0.24 (0.12)	0.06	0.79873	0.19
590	CRHBP	CRHBP	P24387	113	EMIF-AD MBD	MRM	NA		0	0	0			0 (1)	0.32 (1.09)	-0.07 (0.92)	0.07 (0.21)	0.32 (0.19)	-0.1 (0.13)	-0.24	0.38347	0.18	0.48877	0.42	0.06738	0.24 (1.38)	0.11 (0.91)	0.77 (0.84)	0.26 (0.32)	0.13 (0.3)	0.77 (0.38)	0.13	0.77111	-0.51	0.30543	-0.64	0.18603	0.27	0.3458		-0.19 (0.92)	-0.08 (0.85)	-0.01 (1.08)	-0.19 (0.38)	-0.1 (0.18)	-0.01 (0.23)	-0.09	0.82533	-0.18
593	CRISP3	CRISP3	P54108	210	EMIF-AD MBD	MRM	NA		0	0	2			0 (1)	0.4 (1.47)	-0.15 (0.94)	-0.02 (0.16)	0.41 (0.15)	-0.15 (0.11)	-0.43	0.05266	0.13	0.52477	0.56	0.0028	0.01 (1.01)	1.08 (2.2)	0.39 (0.83)	0.07 (0.22)	1.04 (0.28)	0.37 (0.33)	-0.97	0.00743	-0.3	0.43695	0.67	0.12313	0.2	0.4192		-0.12 (1.17)	-0.33 (0.69)	0.04 (1.08)	-0.16 (0.3)	-0.31 (0.17)	0.01 (0.18)	0.15	0.6703	-0.18
594	CRISPLD1	CRISPLD1	Q9H336	143	EMIF-AD MBD	MRM	NA		0	0	1			0 (1)	-0.45 (1.63)	0.26 (0.88)	0.07 (0.2)	-0.44 (0.2)	0.23 (0.13)	0.51	0.07464	-0.15	0.54656	-0.67	0.00703	-0.07 (0.89)	-0.88 (2.55)	-0.53 (0.97)	-0.05 (0.33)	-0.86 (0.36)	-0.54 (0.44)	0.81	0.098	0.48	0.37227	-0.32	0.56844	-0.31	0.4124		0.43 (0.97)	0.28 (0.68)	0.2 (1.04)	0.43 (0.39)	0.25 (0.2)	0.22 (0.2)	0.17	0.68865	0.2
595	CRP	CRP	P02741	249	ADNI	MRM	1		0	-1	0			-0.03 (0.98)	-0.32 (1.18)	-0.53 (1.31)	-0.02 (0.17)	-0.29 (0.13)	-0.51 (0.11)	0.27	0.21682	0.49	0.01898	0.22	0.21179	-0.23 (1)	-0.35 (1.23)	-0.33 (1.3)	-0.23 (0.29)	-0.34 (0.2)	-0.32 (0.28)	0.11	0.75644	0.09	0.82411	-0.02	0.95558	-0.03	0.8609		-0.48 (2.06)	-0.48 (0.88)	-0.62 (1.59)	-0.48 (0.37)	-0.47 (0.16)	-0.61 (0.2)	-0.01	0.97174	0.13
597	CRTAC1	CRTAC1	Q9NQ79	310	EMIF-AD MBD	MRM	NA		-1	1	1	Decrease		0 (1)	-0.55 (0.86)	0.36 (0.85)	0.01 (0.1)	-0.56 (0.1)	0.36 (0.07)	0.57	9e-05	-0.35	0.00791	-0.92	0	-0.27 (0.71)	-0.69 (0.84)	-0.93 (1.03)	-0.31 (0.14)	-0.69 (0.17)	-0.93 (0.2)	0.38	0.08639	0.62	0.01203	0.24	0.36204	-0.33	0.0092	Decrease linear	0.5 (0.95)	0.45 (0.78)	0.21 (0.89)	0.53 (0.18)	0.46 (0.1)	0.21 (0.11)	0.07	0.73012	0.32
599	CRYM	CRYM	Q14894	128	EMIF-AD MBD	MRM	NA		0	1	1			0 (1)	-0.17 (1.39)	0.64 (1.24)	0 (0.23)	-0.15 (0.23)	0.64 (0.15)	0.14	0.66405	-0.64	0.02682	-0.78	0.00453	-0.07 (1.15)	-0.32 (1.13)	-0.16 (2.3)	-0.04 (0.35)	-0.3 (0.44)	-0.21 (0.54)	0.26	0.64294	0.17	0.79142	-0.09	0.89598	-0.08	0.8221		0.86 (1.7)	0.74 (1.01)	0.44 (1.3)	0.91 (0.42)	0.72 (0.24)	0.42 (0.26)	0.18	0.70752	0.48
600	CSF1	CSF1	P09603	270	ADNI	RBM	0	2	0	1	1			0 (1)	-0.18 (0.86)	0.43 (0.8)	-0.02 (0.11)	-0.22 (0.09)	0.42 (0.08)	0.2	0.15693	-0.44	0.0015	-0.64	0	-0.11 (0.73)	-0.08 (0.94)	-0.45 (0.79)	-0.09 (0.17)	-0.15 (0.11)	-0.51 (0.16)	0.06	0.7793	0.42	0.07568	0.36	0.06661	-0.23	0.0698		0.69 (0.58)	0.48 (0.83)	0.27 (0.78)	0.52 (0.23)	0.48 (0.09)	0.29 (0.12)	0.04	0.85773	0.23
601	CSF1	CSF1	P09603	310	EMIF-AD MBD	MRM	NA	1	0	1	1			0 (1)	0.03 (0.98)	0.39 (0.86)	-0.01 (0.11)	0.03 (0.11)	0.4 (0.08)	-0.04	0.7941	-0.41	0.00345	-0.37	0.00521	0.13 (0.99)	-0.01 (0.95)	-0.12 (1.05)	0.09 (0.15)	0 (0.18)	-0.12 (0.22)	0.1	0.69199	0.21	0.42812	0.12	0.68453	-0.12	0.3955		0.49 (0.8)	0.42 (0.77)	0.31 (0.97)	0.52 (0.2)	0.44 (0.11)	0.31 (0.12)	0.08	0.72778	0.21
602	CSF1R	CSF1R	P07333	302	EMIF-AD MBD	MRM	NA		0	0	1			0 (1)	-0.26 (0.88)	0.21 (0.91)	-0.03 (0.11)	-0.27 (0.11)	0.23 (0.08)	0.24	0.1112	-0.26	0.06232	-0.5	0.0002	-0.07 (0.96)	-0.43 (0.67)	-0.39 (0.97)	-0.15 (0.16)	-0.42 (0.18)	-0.39 (0.22)	0.28	0.25799	0.25	0.36077	-0.03	0.91666	-0.15	0.253		0.32 (1.02)	0.24 (0.8)	0.14 (0.99)	0.35 (0.2)	0.27 (0.11)	0.14 (0.12)	0.08	0.73248	0.21
603	CSF2RA	CSF2RA	P15509	177	EMIF-AD MBD	MRM	NA		0	0	1			0 (1)	-0.14 (1.06)	0.22 (0.79)	0.02 (0.14)	-0.15 (0.14)	0.22 (0.1)	0.17	0.40629	-0.21	0.25608	-0.38	0.03056	-0.28 (0.9)	0.05 (1.23)	-0.15 (1.26)	-0.3 (0.2)	0.06 (0.24)	-0.18 (0.36)	-0.36	0.2473	-0.12	0.7756	0.25	0.56935	0.13	0.5937		0.01 (0.61)	0.32 (0.79)	0.2 (0.85)	0.05 (0.24)	0.31 (0.14)	0.21 (0.14)	-0.27	0.32599	-0.16
605	CSPG4	CSPG4	Q6UVK1	310	EMIF-AD MBD	MRM	NA		0	0	1			0 (1)	-0.21 (1.05)	0.11 (1)	0.02 (0.12)	-0.21 (0.12)	0.1 (0.09)	0.23	0.16981	-0.08	0.59859	-0.31	0.0335	-0.18 (0.96)	-0.06 (1.21)	-0.47 (1.03)	-0.17 (0.18)	-0.06 (0.21)	-0.47 (0.25)	-0.11	0.68215	0.3	0.33034	0.41	0.21099	-0.15	0.3241		0.01 (1.15)	0.07 (0.92)	0.19 (1.05)	0.01 (0.22)	0.06 (0.13)	0.19 (0.13)	-0.05	0.85728	-0.18
606	CSPG5	CSPG5	O95196	310	EMIF-AD MBD	MRM	NA		-1	0	1	Decrease	Decrease	0 (1)	-0.59 (0.9)	0.16 (0.81)	-0.02 (0.1)	-0.6 (0.1)	0.17 (0.07)	0.58	6e-05	-0.19	0.14846	-0.78	0	-0.36 (0.73)	-0.6 (0.86)	-1.07 (1.12)	-0.41 (0.14)	-0.6 (0.17)	-1.07 (0.2)	0.19	0.37967	0.67	0.00678	0.47	0.07182	-0.34	0.0088	Decrease linear	0.45 (0.93)	0.21 (0.71)	0.01 (0.85)	0.48 (0.18)	0.23 (0.1)	0 (0.1)	0.24	0.23742	0.48
610	CST3	CST3	P01034	249	ADNI	MRM	1	2	-1	1	1	Decrease	Decrease	0.01 (0.93)	-0.47 (1)	0.81 (1.1)	-0.02 (0.14)	-0.55 (0.11)	0.79 (0.09)	0.53	0.00235	-0.81	0	-1.34	0	-0.26 (0.93)	-0.44 (1.07)	-0.75 (0.89)	-0.2 (0.21)	-0.57 (0.15)	-0.87 (0.21)	0.37	0.16111	0.67	0.02705	0.3	0.23366	-0.31	0.0419	Decrease linear	1.28 (0.7)	0.99 (1.11)	0.4 (1.06)	1.01 (0.28)	0.97 (0.12)	0.44 (0.15)	0.04	0.88738	0.58
611	CST3	CST3	P01034	310	EMIF-AD MBD	MRM	NA	1	-1	1	1			0 (1)	-0.47 (0.85)	0.38 (0.86)	0.03 (0.11)	-0.47 (0.1)	0.37 (0.08)	0.49	0.00084	-0.34	0.01316	-0.83	0	-0.38 (0.85)	-0.45 (0.75)	-0.67 (1)	-0.36 (0.15)	-0.45 (0.18)	-0.67 (0.21)	0.09	0.69637	0.31	0.22331	0.22	0.41863	-0.15	0.2422		0.5 (0.9)	0.48 (0.79)	0.24 (0.92)	0.49 (0.19)	0.47 (0.11)	0.24 (0.11)	0.02	0.91129	0.26
613	CST6	CST6	Q15828	310	EMIF-AD MBD	MRM	NA		-1	0	0	Decrease		0 (1)	-0.21 (0.97)	-0.04 (0.89)	0.1 (0.11)	-0.2 (0.11)	-0.1 (0.08)	0.3	0.04721	0.2	0.14998	-0.1	0.44672	-0.11 (1.06)	-0.04 (0.96)	-0.64 (0.67)	-0.02 (0.15)	-0.04 (0.18)	-0.63 (0.22)	0.03	0.91156	0.61	0.02137	0.58	0.03981	-0.24	0.0871	Decrease non-linear	-0.03 (1.04)	0.09 (0.86)	-0.17 (0.85)	-0.08 (0.19)	0.04 (0.11)	-0.16 (0.11)	-0.13	0.57269	0.07
614	CSTA	CSTA	P01040	149	EMIF-AD MBD	MRM	NA		0	0	2			0 (1)	0.34 (1)	-0.07 (0.59)	0.01 (0.13)	0.34 (0.15)	-0.07 (0.1)	-0.33	0.09399	0.08	0.6481	0.41	0.02461	0.42 (1.18)	0.17 (0.68)	0.32 (0.9)	0.46 (0.19)	0.16 (0.31)	0.32 (0.25)	0.31	0.41259	0.15	0.64575	-0.16	0.685	-0.07	0.7861		0.07 (0.68)	-0.26 (0.45)	0.04 (0.63)	0.06 (0.21)	-0.3 (0.15)	0.06 (0.13)	0.35	0.17337	-0.01
615	CSTB	CSTB	P04080	302	EMIF-AD MBD	MRM	NA		0	1	1			0 (1)	0.04 (1)	0.52 (0.94)	0.12 (0.12)	0.05 (0.11)	0.45 (0.08)	0.07	0.65756	-0.34	0.02454	-0.41	0.00333	0.01 (1.03)	0.28 (1.07)	-0.22 (0.76)	0.13 (0.16)	0.27 (0.19)	-0.19 (0.23)	-0.14	0.56464	0.32	0.25231	0.46	0.12127	-0.11	0.4557		0.18 (0.98)	0.59 (0.85)	0.56 (1.01)	0.14 (0.21)	0.51 (0.12)	0.58 (0.12)	-0.37	0.12286	-0.44
616	CTBS	CTBS	Q01459	249	ADNI	MRM	0	2	0	1	1			0 (1)	-0.24 (1.22)	0.55 (1.17)	-0.03 (0.16)	-0.29 (0.12)	0.55 (0.1)	0.26	0.19559	-0.58	0.00251	-0.84	0	-0.19 (1.06)	-0.39 (1.3)	0.03 (1.21)	-0.16 (0.25)	-0.48 (0.18)	-0.04 (0.25)	0.32	0.30503	-0.12	0.73645	-0.44	0.1462	0.1	0.5911		1.13 (0.68)	0.52 (0.92)	0.43 (1.55)	0.9 (0.33)	0.53 (0.14)	0.46 (0.18)	0.37	0.30336	0.44
617	CTBS	CTBS	Q01459	310	EMIF-AD MBD	MRM	NA	1	0	1	0			0 (1)	0.09 (1.03)	0.11 (0.86)	-0.1 (0.11)	0.08 (0.1)	0.17 (0.08)	-0.18	0.22783	-0.27	0.04836	-0.09	0.48004	0.34 (1.05)	-0.21 (1.04)	-0.01 (0.9)	0.22 (0.15)	-0.2 (0.18)	-0.03 (0.22)	0.42	0.07858	0.25	0.33983	-0.17	0.55338	-0.15	0.2959		0.17 (0.9)	0.07 (0.84)	0.13 (0.87)	0.22 (0.2)	0.13 (0.11)	0.11 (0.11)	0.09	0.67458	0.11
618	CTGF	CTGF	P29279	310	EMIF-AD MBD	MRM	NA		-1	0	1			0 (1)	-0.17 (0.88)	0.52 (0.98)	0.22 (0.11)	-0.17 (0.1)	0.4 (0.08)	0.39	0.00818	-0.18	0.19587	-0.57	1e-05	-0.25 (0.9)	0 (0.88)	-0.26 (0.87)	-0.09 (0.15)	-0.01 (0.18)	-0.21 (0.22)	-0.08	0.73805	0.12	0.64011	0.2	0.47345	-0.05	0.6825		0.63 (0.91)	0.62 (0.9)	0.38 (1.09)	0.57 (0.2)	0.5 (0.11)	0.42 (0.11)	0.07	0.76332	0.15
619	CTHRC1	CTHRC1	Q96CG8	139	EMIF-AD MBD	MRM	NA		0	0	0			0 (1)	-0.11 (0.68)	0.15 (0.67)	0.11 (0.15)	-0.12 (0.12)	0.11 (0.09)	0.22	0.23691	0	0.99868	-0.22	0.13666	-0.02 (0.62)	-0.12 (0.64)	-0.25 (0.85)	0.08 (0.17)	-0.17 (0.2)	-0.26 (0.21)	0.24	0.35262	0.34	0.20912	0.09	0.75099	-0.16	0.2402		0.28 (0.52)	0.11 (0.63)	0.14 (0.79)	0.26 (0.19)	0.07 (0.12)	0.15 (0.13)	0.19	0.40188	0.12
621	CTSA	CTSA	P10619	241	EMIF-AD MBD	MRM	NA		0	0	0			0 (1)	0.18 (1.25)	-0.22 (1.12)	-0.15 (0.15)	0.16 (0.15)	-0.13 (0.1)	-0.32	0.13041	-0.02	0.90212	0.29	0.10734	0.45 (1.45)	-0.05 (1.04)	-0.08 (0.98)	0.33 (0.23)	-0.05 (0.25)	-0.22 (0.38)	0.38	0.26549	0.55	0.21352	0.17	0.71112	-0.32	0.1653		0.26 (1.24)	-0.43 (1.15)	-0.14 (1.03)	0.3 (0.28)	-0.33 (0.16)	-0.17 (0.15)	0.63	0.05074	0.48
622	CTSB	CTSB	P07858	310	EMIF-AD MBD	MRM	NA		0	1	1			0 (1)	-0.09 (0.84)	0.27 (0.76)	-0.07 (0.1)	-0.11 (0.09)	0.31 (0.07)	0.04	0.79515	-0.38	0.00222	-0.42	0.00044	0.09 (0.83)	-0.32 (0.8)	-0.17 (0.85)	0.01 (0.13)	-0.32 (0.16)	-0.18 (0.19)	0.33	0.11256	0.19	0.40717	-0.14	0.57272	-0.13	0.2788		0.29 (0.91)	0.22 (0.76)	0.31 (0.72)	0.34 (0.17)	0.26 (0.1)	0.29 (0.1)	0.07	0.70049	0.04
623	CTSC	CTSC	P53634	297	EMIF-AD MBD	MRM	NA		0	0	2			0 (1)	0.08 (0.93)	-0.25 (0.81)	-0.04 (0.11)	0.08 (0.11)	-0.22 (0.08)	-0.11	0.44864	0.19	0.17528	0.3	0.02336	0.21 (1.07)	-0.1 (0.93)	0.09 (0.58)	0.17 (0.16)	-0.09 (0.18)	0.08 (0.21)	0.27	0.26487	0.09	0.72549	-0.17	0.52532	-0.04	0.7559		-0.17 (0.89)	-0.31 (0.91)	-0.2 (0.66)	-0.16 (0.19)	-0.3 (0.11)	-0.2 (0.11)	0.14	0.51688	0.04
624	CTSD	CTSD	P07339	249	ADNI	MRM	1	2	0	0	0			0 (0.89)	0.02 (0.95)	0.18 (1.02)	0 (0.14)	0.01 (0.11)	0.17 (0.09)	-0.01	0.96113	-0.17	0.30783	-0.16	0.24998	0.06 (0.87)	-0.07 (1.12)	0.18 (0.55)	0.06 (0.22)	-0.07 (0.16)	0.17 (0.22)	0.14	0.61503	-0.1	0.74748	-0.24	0.36856	0.05	0.7656		0.02 (1.05)	0.2 (1.02)	0.19 (1.04)	0.02 (0.29)	0.19 (0.13)	0.19 (0.16)	-0.17	0.60097	-0.17
625	CTSD	CTSD	P07339	310	EMIF-AD MBD	MRM	NA	1	1	0	0			0 (1)	0.25 (1.12)	0.01 (0.93)	-0.12 (0.11)	0.24 (0.11)	0.08 (0.08)	-0.36	0.02272	-0.2	0.16343	0.16	0.2503	0.37 (1.29)	0.18 (0.81)	0.12 (1.13)	0.22 (0.17)	0.19 (0.2)	0.1 (0.23)	0.03	0.89623	0.12	0.67452	0.09	0.77793	-0.04	0.7797		0.12 (1)	-0.12 (0.91)	0.1 (0.93)	0.2 (0.21)	-0.04 (0.12)	0.07 (0.12)	0.23	0.33647	0.12
626	CTSF	CTSF	Q9UBX1	310	EMIF-AD MBD	MRM	NA		0	0	1			0 (1)	-0.14 (0.88)	0.07 (0.79)	-0.07 (0.1)	-0.15 (0.1)	0.12 (0.07)	0.08	0.59066	-0.19	0.14362	-0.27	0.03103	-0.04 (1)	-0.36 (0.75)	-0.04 (0.76)	-0.11 (0.14)	-0.36 (0.17)	-0.06 (0.2)	0.24	0.2646	-0.06	0.81972	-0.3	0.25015	-0.02	0.8993		0.04 (0.81)	0.03 (0.85)	0.14 (0.72)	0.07 (0.18)	0.07 (0.1)	0.12 (0.1)	0	0.98886	-0.05
628	CTSH	CTSH	P09668	310	EMIF-AD MBD	MRM	NA		0	0	1	Decrease		0 (1)	-0.23 (1.33)	0.14 (1.11)	-0.02 (0.13)	-0.23 (0.13)	0.15 (0.1)	0.21	0.26208	-0.16	0.3464	-0.37	0.02297	0.18 (1.13)	-0.65 (1.55)	-0.49 (1.2)	0.2 (0.2)	-0.65 (0.24)	-0.49 (0.29)	0.85	0.00742	0.69	0.04903	-0.16	0.67052	-0.45	0.0215	Decrease linear	0.39 (0.93)	0.16 (1.09)	0.02 (1.19)	0.38 (0.26)	0.16 (0.15)	0.02 (0.15)	0.22	0.46119	0.35
629	CTSK	CTSK	P43235	310	EMIF-AD MBD	MRM	NA		0	1	1			0 (1)	-0.19 (0.96)	0.25 (0.82)	-0.07 (0.1)	-0.21 (0.1)	0.29 (0.07)	0.14	0.33754	-0.36	0.00694	-0.5	9e-05	-0.01 (1.04)	-0.33 (0.79)	-0.39 (1.01)	-0.1 (0.15)	-0.32 (0.17)	-0.4 (0.21)	0.22	0.32526	0.3	0.24013	0.07	0.78776	-0.17	0.2319		0.37 (0.98)	0.25 (0.77)	0.21 (0.82)	0.42 (0.19)	0.3 (0.11)	0.19 (0.11)	0.12	0.58221	0.22
630	CTSL	CTSL	P07711	249	ADNI	MRM	0	2	-1	0	1			0 (1)	-0.61 (1.43)	0.4 (1.3)	-0.01 (0.19)	-0.61 (0.14)	0.41 (0.12)	0.6	0.01049	-0.42	0.05932	-1.02	0	-0.41 (1.51)	-0.66 (1.4)	-0.69 (1.48)	-0.42 (0.31)	-0.67 (0.21)	-0.69 (0.3)	0.25	0.49821	0.28	0.51921	0.02	0.94634	-0.09	0.7079		0.74 (0.88)	0.43 (1.31)	0.26 (1.39)	0.67 (0.4)	0.45 (0.17)	0.27 (0.21)	0.22	0.61182	0.4
631	CTSL	CTSL	P07711	310	EMIF-AD MBD	MRM	NA	1	0	1	1			0 (1)	-0.18 (0.99)	0.23 (0.84)	-0.09 (0.11)	-0.2 (0.1)	0.28 (0.08)	0.11	0.47329	-0.38	0.00564	-0.48	0.0002	0.05 (1.09)	-0.36 (0.78)	-0.43 (0.96)	-0.05 (0.15)	-0.36 (0.18)	-0.44 (0.21)	0.3	0.19396	0.39	0.13445	0.08	0.7602	-0.22	0.1311		0.33 (0.98)	0.24 (0.82)	0.18 (0.83)	0.38 (0.19)	0.29 (0.11)	0.17 (0.11)	0.09	0.69386	0.21
633	CTSO	CTSO	P43234	310	EMIF-AD MBD	MRM	NA		0	1	1			0 (1)	-0.13 (0.91)	0.22 (0.9)	-0.07 (0.11)	-0.14 (0.1)	0.26 (0.08)	0.07	0.63149	-0.33	0.01682	-0.4	0.00219	0.01 (0.85)	-0.23 (0.91)	-0.29 (1.03)	-0.08 (0.15)	-0.23 (0.18)	-0.3 (0.22)	0.15	0.52838	0.23	0.38846	0.08	0.78362	-0.14	0.2955		0.21 (1.18)	0.17 (0.81)	0.26 (0.89)	0.26 (0.2)	0.22 (0.11)	0.25 (0.11)	0.04	0.85582	0.01
634	CTSS	CTSS	P25774	310	EMIF-AD MBD	MRM	NA		0	1	1			0 (1)	0 (0.95)	0.44 (0.83)	0.09 (0.11)	0 (0.1)	0.39 (0.08)	0.09	0.5311	-0.3	0.02631	-0.39	0.00227	0.1 (0.96)	0.04 (0.83)	-0.27 (1.09)	0.14 (0.15)	0.04 (0.18)	-0.25 (0.21)	0.1	0.67329	0.39	0.13234	0.29	0.29319	-0.2	0.1472		0.25 (0.93)	0.53 (0.74)	0.41 (0.89)	0.24 (0.19)	0.5 (0.11)	0.43 (0.11)	-0.26	0.24105	-0.18
636	CTSZ	CTSZ	Q9UBR2	310	EMIF-AD MBD	MRM	NA		0	0	0			0 (1)	0.1 (1.05)	0.02 (0.9)	-0.08 (0.11)	0.09 (0.11)	0.07 (0.08)	-0.17	0.27858	-0.15	0.297	0.02	0.88713	0.23 (1.18)	0.02 (0.95)	-0.07 (0.92)	0.14 (0.16)	0.03 (0.19)	-0.09 (0.23)	0.11	0.66615	0.23	0.41667	0.12	0.69275	-0.1	0.5031		0.19 (0.93)	-0.08 (0.9)	0.07 (0.89)	0.24 (0.21)	-0.03 (0.12)	0.06 (0.12)	0.27	0.24579	0.18
638	CUTA	CUTA	O60888	249	ADNI	MRM	0	2	-1	1	1		Decrease	0 (1)	-0.86 (1.4)	0.52 (1.22)	-0.03 (0.17)	-0.9 (0.13)	0.52 (0.11)	0.86	7e-05	-0.56	0.00635	-1.42	0	-0.59 (1.44)	-0.93 (1.46)	-0.96 (1.27)	-0.57 (0.28)	-1 (0.19)	-1.02 (0.27)	0.44	0.19761	0.45	0.24482	0.02	0.95796	-0.18	0.4025		1.1 (0.83)	0.63 (1.18)	0.18 (1.29)	0.86 (0.36)	0.65 (0.16)	0.22 (0.19)	0.22	0.57859	0.65
639	CUTA	CUTA	O60888	310	EMIF-AD MBD	MRM	NA	1	0	1	1	Decrease		0 (1)	-0.29 (0.87)	0.24 (0.77)	-0.04 (0.1)	-0.29 (0.1)	0.26 (0.07)	0.26	0.06758	-0.3	0.01887	-0.56	1e-05	0 (0.88)	-0.57 (0.76)	-0.49 (0.84)	-0.04 (0.14)	-0.57 (0.16)	-0.49 (0.19)	0.53	0.0128	0.45	0.05496	-0.08	0.75636	-0.23	0.058	Decrease non-linear	0.13 (0.69)	0.31 (0.7)	0.19 (0.87)	0.16 (0.17)	0.33 (0.1)	0.19 (0.1)	-0.18	0.37469	-0.03
640	CXADR	CXADR	P78310	198	EMIF-AD MBD	MRM	NA		0	1	1			0 (1)	-0.18 (0.75)	0.25 (0.87)	-0.1 (0.13)	-0.23 (0.13)	0.33 (0.1)	0.13	0.44089	-0.43	0.01168	-0.56	0.00059	0 (0.77)	-0.37 (0.79)	-0.26 (0.64)	-0.19 (0.19)	-0.4 (0.21)	-0.3 (0.24)	0.21	0.44608	0.11	0.71166	-0.1	0.74408	-0.13	0.3715		0.15 (1.08)	0.35 (0.86)	0.14 (0.78)	0.21 (0.22)	0.43 (0.12)	0.16 (0.14)	-0.22	0.37894	0.05
641	CXCL10	CXCL10	P02778	270	ADNI	RBM	0		0	0	0			0 (1)	-0.15 (1.05)	-0.04 (0.89)	-0.02 (0.13)	-0.18 (0.1)	-0.04 (0.09)	0.16	0.32607	0.02	0.90695	-0.14	0.27378	-0.11 (0.81)	-0.12 (1.17)	-0.24 (1.04)	-0.1 (0.2)	-0.17 (0.14)	-0.27 (0.2)	0.06	0.80513	0.17	0.55719	0.11	0.65479	-0.06	0.7109		0.07 (0.52)	-0.02 (1.04)	-0.09 (0.71)	-0.08 (0.28)	-0.01 (0.11)	-0.07 (0.15)	-0.07	0.82581	0
642	CXCL12	CXCL12	P48061	310	EMIF-AD MBD	MRM	NA		0	0	0			0 (1)	-0.2 (1.53)	0.02 (1.33)	-0.06 (0.15)	-0.2 (0.15)	0.05 (0.11)	0.14	0.5156	-0.11	0.56882	-0.25	0.17819	-0.28 (1.62)	-0.52 (1.38)	0.42 (1.45)	-0.31 (0.24)	-0.52 (0.28)	0.4 (0.34)	0.2	0.58432	-0.71	0.08641	-0.91	0.03993	0.27	0.2384		-0.27 (1.12)	0.17 (1.41)	-0.04 (1.31)	-0.27 (0.3)	0.21 (0.17)	-0.06 (0.18)	-0.48	0.17076	-0.21
644	CXCL16	CXCL16	Q9H2A7	223	EMIF-AD MBD	MRM	NA		0	0	1		Increase	0 (1)	-0.08 (1.11)	0.44 (1.1)	0.11 (0.15)	-0.1 (0.14)	0.39 (0.1)	0.21	0.31121	-0.28	0.14095	-0.48	0.00682	-0.1 (1.39)	-0.17 (0.9)	0.12 (0.74)	-0.02 (0.22)	-0.21 (0.25)	0.13 (0.33)	0.19	0.56463	-0.15	0.70643	-0.34	0.40374	-0.02	0.899		0.16 (1.34)	0.28 (0.96)	0.73 (1.15)	0.16 (0.3)	0.23 (0.15)	0.75 (0.17)	-0.07	0.83247	-0.6
645	CXCL8	CXCL8	P10145	270	ADNI	RBM	0		0	0	0			0 (1)	-0.07 (1.02)	0.12 (1)	-0.01 (0.14)	-0.11 (0.1)	0.11 (0.09)	0.1	0.55718	-0.12	0.45512	-0.22	0.10342	-0.22 (0.72)	0.01 (1.2)	-0.07 (0.85)	-0.2 (0.21)	-0.07 (0.15)	-0.13 (0.21)	-0.14	0.60073	-0.07	0.8208	0.07	0.78751	0.07	0.6689		0.24 (0.71)	0.08 (1.11)	0.15 (0.87)	0.09 (0.29)	0.07 (0.12)	0.17 (0.15)	0.02	0.95355	-0.08
646	CXCL9	CXCL9	Q07325	270	ADNI	RBM	0		0	0	0			0 (1)	-0.06 (1.08)	-0.02 (1.19)	-0.05 (0.13)	-0.11 (0.1)	-0.01 (0.09)	0.06	0.70789	-0.03	0.84385	-0.09	0.47988	-0.01 (0.69)	-0.09 (1.16)	-0.05 (1.24)	0 (0.21)	-0.19 (0.14)	-0.12 (0.2)	0.19	0.44126	0.12	0.67008	-0.07	0.77487	-0.05	0.7516		0.67 (1.27)	-0.14 (1.27)	-0.04 (0.97)	0.32 (0.28)	-0.11 (0.12)	0.01 (0.15)	0.43	0.16348	0.31
647	CXorf36	CXorf36	Q9H7Y0	310	EMIF-AD MBD	MRM	NA		-1	1	1			0 (1)	-0.25 (0.94)	0.35 (0.81)	0.04 (0.1)	-0.26 (0.1)	0.33 (0.07)	0.3	0.04095	-0.29	0.03211	-0.58	1e-05	-0.05 (0.95)	-0.39 (0.84)	-0.47 (1.03)	-0.02 (0.14)	-0.39 (0.17)	-0.45 (0.21)	0.37	0.09979	0.43	0.08373	0.06	0.81784	-0.24	0.0885		0.67 (0.79)	0.32 (0.79)	0.27 (0.82)	0.66 (0.18)	0.29 (0.1)	0.28 (0.11)	0.37	0.0847	0.38
648	CYCS	CYCS	P99999	310	EMIF-AD MBD	MRM	NA		-1	1	1			0 (1)	-0.48 (1.06)	0.56 (0.78)	0 (0.11)	-0.49 (0.1)	0.56 (0.08)	0.49	0.00114	-0.56	5e-05	-1.05	0	-0.32 (0.99)	-0.51 (0.88)	-0.77 (1.4)	-0.37 (0.15)	-0.51 (0.18)	-0.77 (0.21)	0.13	0.56777	0.4	0.12615	0.26	0.34283	-0.2	0.2077		0.6 (0.98)	0.65 (0.67)	0.43 (0.81)	0.63 (0.19)	0.67 (0.11)	0.43 (0.11)	-0.04	0.86398	0.21
650	CYTL1	CYTL1	Q9NRR1	298	EMIF-AD MBD	MRM	NA		-1	0	1			0 (1)	-0.29 (0.94)	0.37 (1.16)	0.15 (0.13)	-0.28 (0.12)	0.29 (0.09)	0.43	0.01364	-0.14	0.40165	-0.57	0.00019	-0.35 (0.91)	-0.07 (0.78)	-0.49 (1.19)	-0.22 (0.18)	-0.07 (0.22)	-0.46 (0.27)	-0.15	0.61087	0.24	0.4511	0.39	0.26091	-0.08	0.5606		0.01 (0.99)	0.48 (1.25)	0.38 (1.1)	-0.05 (0.24)	0.4 (0.13)	0.41 (0.14)	-0.45	0.10459	-0.45
651	DAG1	DAG1	Q14118	249	ADNI	MRM	1	2	-1	1	1		Decrease	0 (0.91)	-0.71 (1)	0.45 (1.02)	-0.04 (0.12)	-0.78 (0.1)	0.45 (0.08)	0.74	0	-0.49	0.00107	-1.23	0	-0.6 (0.98)	-0.69 (1.06)	-0.86 (0.92)	-0.55 (0.2)	-0.82 (0.14)	-0.97 (0.19)	0.27	0.26861	0.42	0.1304	0.15	0.51016	-0.18	0.2339		1.08 (0.68)	0.55 (0.96)	0.13 (1.1)	0.77 (0.25)	0.55 (0.11)	0.17 (0.14)	0.22	0.43033	0.6
652	DAG1	DAG1	Q14118	310	EMIF-AD MBD	MRM	NA	1	-1	1	1			0 (1)	-0.45 (0.88)	0.41 (0.71)	0.01 (0.1)	-0.46 (0.1)	0.41 (0.07)	0.47	0.00071	-0.4	0.00171	-0.86	0	-0.32 (0.88)	-0.59 (0.86)	-0.53 (0.93)	-0.33 (0.13)	-0.59 (0.16)	-0.53 (0.19)	0.26	0.2044	0.2	0.3841	-0.06	0.79755	-0.13	0.3057		0.5 (0.78)	0.44 (0.64)	0.34 (0.75)	0.51 (0.17)	0.45 (0.1)	0.34 (0.1)	0.06	0.74168	0.17
654	DBI	DBI	P07108	302	EMIF-AD MBD	MRM	NA		-1	1	1			0 (1)	-0.24 (0.79)	0.48 (0.75)	0.04 (0.1)	-0.24 (0.1)	0.46 (0.07)	0.28	0.04375	-0.42	0.00102	-0.7	0	-0.12 (0.87)	-0.29 (0.78)	-0.4 (0.66)	-0.09 (0.14)	-0.29 (0.16)	-0.39 (0.19)	0.2	0.35042	0.3	0.20032	0.1	0.67862	-0.13	0.2718		0.57 (0.78)	0.51 (0.73)	0.42 (0.78)	0.57 (0.17)	0.49 (0.1)	0.42 (0.1)	0.07	0.70685	0.14
656	DCC	DCC	P43146	310	EMIF-AD MBD	MRM	NA		-1	0	1	Decrease	Decrease	0 (1)	-0.68 (0.92)	0.1 (0.85)	-0.03 (0.1)	-0.69 (0.1)	0.12 (0.07)	0.66	1e-05	-0.15	0.26287	-0.81	0	-0.47 (0.72)	-0.67 (0.9)	-1.13 (1.19)	-0.54 (0.14)	-0.66 (0.17)	-1.13 (0.21)	0.13	0.57765	0.59	0.01889	0.47	0.08382	-0.31	0.0222	Decrease linear	0.32 (1.05)	0.16 (0.81)	-0.04 (0.82)	0.36 (0.19)	0.19 (0.1)	-0.05 (0.11)	0.17	0.41356	0.41
657	DCD	DCD	P81605	310	EMIF-AD MBD	MRM	NA		0	0	0			0 (1)	0.24 (0.94)	0.01 (0.88)	-0.02 (0.11)	0.23 (0.11)	0.02 (0.08)	-0.26	0.08548	-0.05	0.72949	0.21	0.1075	0.43 (0.86)	0.17 (0.99)	-0.07 (0.99)	0.41 (0.15)	0.18 (0.18)	-0.07 (0.22)	0.23	0.33458	0.48	0.07417	0.25	0.39069	-0.26	0.0648		0.03 (0.87)	-0.06 (0.81)	0.07 (0.95)	0.04 (0.2)	-0.05 (0.11)	0.07 (0.11)	0.09	0.67484	-0.03
660	DCN	DCN	P07585	310	EMIF-AD MBD	MRM	NA		1	0	0			0 (1)	0.19 (1.09)	-0.18 (1.01)	-0.17 (0.12)	0.18 (0.11)	-0.08 (0.08)	-0.35	0.03239	-0.09	0.5355	0.26	0.07109	0.34 (1.24)	0.01 (0.93)	0.12 (0.96)	0.17 (0.17)	0.02 (0.2)	0.09 (0.24)	0.15	0.56057	0.09	0.76179	-0.07	0.83621	-0.05	0.7505		-0.26 (1.09)	-0.28 (0.89)	-0.04 (1.09)	-0.18 (0.22)	-0.17 (0.12)	-0.07 (0.13)	-0.01	0.97008	-0.11
661	DDAH1	DDAH1	O94760	310	EMIF-AD MBD	MRM	NA		0	1	1			0 (1)	-0.24 (0.93)	0.96 (0.79)	0.02 (0.1)	-0.25 (0.1)	0.96 (0.07)	0.27	0.06177	-0.94	0	-1.21	0	-0.16 (0.83)	-0.34 (0.98)	-0.29 (1.07)	-0.19 (0.14)	-0.34 (0.17)	-0.29 (0.2)	0.15	0.49815	0.1	0.68747	-0.05	0.84574	-0.08	0.5657		0.9 (0.91)	0.97 (0.73)	0.97 (0.83)	0.93 (0.18)	0.98 (0.1)	0.97 (0.11)	-0.05	0.80208	-0.04
663	DDB1	DDB1	Q16531	209	EMIF-AD MBD	MRM	NA		0	0	0			0 (1)	-0.2 (1.28)	0.11 (0.96)	-0.05 (0.16)	-0.21 (0.15)	0.15 (0.11)	0.15	0.47902	-0.2	0.32194	-0.35	0.0584	-0.42 (1.03)	0.19 (1.74)	-0.42 (0.43)	-0.48 (0.23)	0.19 (0.25)	-0.45 (0.36)	-0.67	0.05178	-0.04	0.9292	0.63	0.1525	0.06	0.8166		0.02 (1.05)	0.16 (0.83)	0.1 (1.07)	0.04 (0.26)	0.19 (0.16)	0.1 (0.17)	-0.15	0.61528	-0.06
665	DDR1	DDR1	Q08345	310	EMIF-AD MBD	MRM	NA		0	0	1			0 (1)	-0.17 (1.05)	0.09 (0.88)	-0.07 (0.11)	-0.18 (0.11)	0.14 (0.08)	0.11	0.4686	-0.21	0.13746	-0.32	0.01673	-0.1 (1.14)	-0.21 (0.82)	-0.27 (1.17)	-0.2 (0.16)	-0.2 (0.19)	-0.29 (0.22)	0	0.99285	0.08	0.75863	0.08	0.78023	-0.05	0.7294		0.26 (1.24)	0.07 (0.75)	0.06 (0.87)	0.32 (0.2)	0.12 (0.11)	0.04 (0.12)	0.19	0.40115	0.28
667	DDT	DDT	P30046	106	EMIF-AD MBD	MRM	NA		0	0	0			0 (1)	-0.11 (0.46)	0.14 (0.62)	0.06 (0.15)	-0.11 (0.14)	0.11 (0.1)	0.17	0.40439	-0.05	0.77593	-0.22	0.20564	-0.16 (0.46)	-0.08 (0.57)	-0.06 (0.22)	-0.02 (0.19)	-0.07 (0.17)	-0.12 (0.26)	0.05	0.83694	0.1	0.76137	0.05	0.88058	-0.18	0.1091		0.23 (0.74)	0.22 (0.72)	-0.03 (0.36)	0.18 (0.26)	0.2 (0.11)	-0.05 (0.14)	-0.02	0.95171	0.22
672	DEFA3	DEFA3	P59666	253	EMIF-AD MBD	MRM	NA		0	0	2			0 (1)	-0.01 (0.44)	-0.22 (0.6)	-0.01 (0.09)	-0.01 (0.09)	-0.22 (0.07)	0	0.99805	0.22	0.063	0.22	0.04638	-0.09 (0.37)	0.25 (0.4)	-0.19 (0.49)	-0.07 (0.1)	0.25 (0.12)	-0.19 (0.14)	-0.32	0.04049	0.12	0.46608	0.44	0.01606	-0.02	0.7996		-0.28 (0.37)	-0.2 (0.66)	-0.23 (0.61)	-0.31 (0.13)	-0.2 (0.08)	-0.23 (0.08)	-0.11	0.45564	-0.07
674	DES	DES	P17661	224	EMIF-AD MBD	MRM	NA		0	0	0			0 (1)	0.03 (0.66)	-0.11 (0.92)	0.09 (0.12)	0.05 (0.12)	-0.17 (0.09)	0.04	0.81181	0.26	0.08785	0.22	0.14	0.04 (0.77)	0.08 (0.49)	-0.05 (0.63)	0.16 (0.17)	0.07 (0.22)	-0.01 (0.24)	0.08	0.75907	0.17	0.56864	0.08	0.79909	-0.1	0.3596		-0.29 (0.89)	-0.05 (0.99)	-0.1 (0.88)	-0.33 (0.2)	-0.11 (0.13)	-0.1 (0.12)	-0.22	0.34769	-0.23
675	DGCR2	DGCR2	P98153	253	EMIF-AD MBD	MRM	NA		0	1	1	Decrease		0 (1)	-0.34 (0.87)	0.26 (0.75)	-0.07 (0.11)	-0.34 (0.11)	0.3 (0.08)	0.27	0.07933	-0.37	0.00827	-0.64	0	-0.13 (0.72)	-0.28 (0.73)	-0.8 (1.13)	-0.19 (0.15)	-0.28 (0.18)	-0.8 (0.2)	0.08	0.72465	0.61	0.01473	0.53	0.05264	-0.29	0.034	Decrease linear	0.29 (0.97)	0.23 (0.75)	0.29 (0.69)	0.35 (0.2)	0.25 (0.1)	0.28 (0.11)	0.1	0.65094	0.08
676	DHRS9	DHRS9	Q9BPW9	93	EMIF-AD MBD	MRM	NA		0	0	0			0 (1)	0.01 (0.82)	0.24 (1.24)	-0.03 (0.23)	0 (0.25)	0.26 (0.17)	-0.03	0.92934	-0.29	0.32949	-0.26	0.39042	-0.11 (0.49)	0.11 (1.21)	0.06 (0.78)	-0.01 (0.44)	0.02 (0.47)	-0.05 (0.48)	-0.02	0.97208	0.04	0.95153	0.06	0.92452	-0.16	0.5116		1.18 (2.64)	0.04 (0.7)	0.21 (1.14)	1.09 (0.47)	0.09 (0.23)	0.17 (0.31)	1	0.06197	0.92
678	DISP3	DISP3	Q9P2K9	119	EMIF-AD MBD	MRM	NA		1	0	2		Increase	0 (1)	0.85 (0.93)	0.36 (0.64)	0.02 (0.16)	0.85 (0.16)	0.35 (0.11)	-0.83	0.00027	-0.33	0.10231	0.5	0.0114	0.59 (1.05)	1.2 (0.88)	0.69 (0.5)	0.59 (0.21)	1.19 (0.22)	0.68 (0.34)	-0.6	0.05455	-0.09	0.82797	0.51	0.20447	0.13	0.6125		-0.24 (0.63)	0.46 (0.72)	0.42 (0.4)	-0.24 (0.28)	0.47 (0.14)	0.41 (0.16)	-0.71	0.02445	-0.66
679	DKK3	DKK3	Q9UBP4	310	EMIF-AD MBD	MRM	NA		-1	1	1			0 (1)	-0.46 (0.8)	0.28 (0.73)	0.01 (0.1)	-0.47 (0.09)	0.28 (0.07)	0.48	0.00037	-0.26	0.03218	-0.74	0	-0.26 (0.81)	-0.61 (0.75)	-0.67 (0.81)	-0.26 (0.13)	-0.61 (0.15)	-0.66 (0.18)	0.35	0.0813	0.4	0.07593	0.05	0.84895	-0.2	0.0895		0.37 (0.77)	0.31 (0.71)	0.22 (0.75)	0.37 (0.16)	0.31 (0.09)	0.22 (0.1)	0.07	0.71379	0.15
680	DLD	DLD	P09622	269	EMIF-AD MBD	MRM	NA		0	1	1			0 (1)	-0.2 (0.74)	0.36 (0.69)	-0.07 (0.1)	-0.21 (0.09)	0.4 (0.07)	0.14	0.31015	-0.47	0.00024	-0.61	0	-0.05 (0.57)	-0.23 (0.91)	-0.52 (0.75)	-0.13 (0.13)	-0.24 (0.15)	-0.5 (0.19)	0.11	0.56164	0.38	0.09351	0.27	0.26509	-0.19	0.0994		0.35 (0.75)	0.37 (0.69)	0.36 (0.69)	0.39 (0.17)	0.41 (0.09)	0.34 (0.1)	-0.02	0.89782	0.05
681	DLK2	DLK2	Q6UY11	277	EMIF-AD MBD	MRM	NA		-1	0	1	Decrease		0 (1)	-0.53 (0.88)	0.12 (0.7)	0 (0.1)	-0.53 (0.1)	0.12 (0.08)	0.53	0.00025	-0.12	0.36532	-0.65	0	-0.41 (0.71)	-0.46 (0.85)	-0.91 (1.14)	-0.43 (0.14)	-0.45 (0.16)	-0.92 (0.19)	0.02	0.90993	0.49	0.03853	0.46	0.06139	-0.21	0.1099	Decrease non-linear	0.35 (0.81)	0.14 (0.66)	0.02 (0.7)	0.35 (0.19)	0.15 (0.1)	0.02 (0.1)	0.2	0.36031	0.33
682	DLST	DLST	P36957	227	EMIF-AD MBD	MRM	NA		-1	0	1			0 (1)	-0.33 (1.07)	0.09 (0.77)	0.02 (0.13)	-0.33 (0.12)	0.08 (0.09)	0.35	0.04383	-0.06	0.70447	-0.41	0.00717	-0.21 (1.11)	-0.46 (0.97)	-0.34 (1.18)	-0.2 (0.18)	-0.46 (0.2)	-0.34 (0.24)	0.27	0.31976	0.15	0.62633	-0.12	0.70243	-0.09	0.6011		-0.03 (0.84)	0.2 (0.65)	0 (0.87)	-0.04 (0.23)	0.19 (0.13)	0 (0.14)	-0.23	0.38629	-0.04
683	DMKN	DMKN	Q6E0U4	184	EMIF-AD MBD	MRM	NA		0	0	0			0 (1)	0.02 (0.53)	-0.05 (0.92)	0.07 (0.13)	0.01 (0.12)	-0.08 (0.1)	0.06	0.74009	0.15	0.37856	0.09	0.55908	0.11 (0.5)	-0.02 (0.56)	-0.14 (0.57)	0.15 (0.17)	-0.04 (0.2)	-0.08 (0.27)	0.19	0.47708	0.23	0.4688	0.04	0.90324	-0.16	0.106		-0.15 (1.1)	-0.02 (0.85)	-0.06 (0.95)	-0.15 (0.23)	-0.06 (0.13)	-0.04 (0.14)	-0.09	0.7407	-0.11
685	DMXL2	DMXL2	Q8TDJ6	309	EMIF-AD MBD	MRM	NA		0	0	0			0 (1)	0.29 (0.94)	0.04 (0.95)	0.01 (0.11)	0.3 (0.11)	0.04 (0.08)	-0.29	0.06079	-0.03	0.82728	0.26	0.05512	0.14 (0.74)	0.37 (0.87)	0.53 (1.38)	0.14 (0.16)	0.37 (0.19)	0.52 (0.24)	-0.24	0.34961	-0.39	0.17826	-0.15	0.62666	0.17	0.22		0.04 (1.08)	-0.01 (0.77)	0.1 (1.08)	0.04 (0.21)	0 (0.12)	0.1 (0.12)	0.04	0.86119	-0.06
686	DNAAF1	DNAAF1	Q8NEP3	229	EMIF-AD MBD	MRM	NA		0	0	2			0 (1)	0.21 (0.92)	-0.24 (1.05)	-0.09 (0.14)	0.22 (0.13)	-0.2 (0.1)	-0.3	0.11555	0.12	0.5093	0.42	0.01013	-0.2 (0.8)	0.69 (0.92)	0.41 (0.81)	-0.23 (0.19)	0.7 (0.23)	0.38 (0.27)	-0.93	0.00243	-0.61	0.06955	0.32	0.36789	0.41	0.0094		-0.39 (1.36)	-0.27 (0.99)	-0.15 (1)	-0.4 (0.24)	-0.22 (0.14)	-0.17 (0.14)	-0.17	0.53415	-0.22
687	DNAH5	DNAH5	Q8TE73	193	EMIF-AD MBD	MRM	NA		0	1	1			0 (1)	-0.13 (1.04)	0.31 (0.96)	-0.1 (0.15)	-0.18 (0.15)	0.37 (0.1)	0.08	0.69697	-0.47	0.01555	-0.55	0.00295	-0.19 (0.85)	0.19 (1.4)	-0.38 (0.95)	-0.31 (0.22)	0.07 (0.29)	-0.36 (0.3)	-0.39	0.2746	0.05	0.89651	0.44	0.29279	-0.03	0.8815		0.33 (1.11)	0.35 (0.96)	0.25 (0.93)	0.38 (0.25)	0.42 (0.15)	0.26 (0.15)	-0.04	0.88262	0.12
691	DNAJC3	DNAJC3	Q13217	310	EMIF-AD MBD	MRM	NA		0	1	1			0 (1)	-0.27 (1.1)	0.24 (1.04)	-0.06 (0.12)	-0.27 (0.12)	0.28 (0.09)	0.21	0.22904	-0.34	0.03094	-0.54	0.00028	-0.36 (1.17)	-0.25 (0.9)	-0.09 (1.26)	-0.41 (0.18)	-0.25 (0.22)	-0.1 (0.26)	-0.16	0.57893	-0.3	0.33442	-0.15	0.66409	0.12	0.4791		0.06 (0.67)	0.22 (0.96)	0.32 (1.21)	0.08 (0.23)	0.26 (0.13)	0.31 (0.14)	-0.17	0.51391	-0.22
693	DNASE2	DNASE2	O00115	273	EMIF-AD MBD	MRM	NA		0	0	0			0 (1)	0.16 (1.18)	0.06 (1.04)	-0.11 (0.13)	0.15 (0.13)	0.12 (0.09)	-0.25	0.16486	-0.22	0.18197	0.03	0.85525	0.37 (1.13)	0.16 (1)	-0.22 (1.42)	0.24 (0.2)	0.16 (0.23)	-0.23 (0.25)	0.07	0.80425	0.47	0.14405	0.4	0.24955	-0.25	0.1602		0.09 (1.1)	0.02 (0.94)	0.08 (1.14)	0.16 (0.25)	0.09 (0.14)	0.06 (0.14)	0.08	0.78501	0.1
694	DNER	DNER	Q8NFT8	310	EMIF-AD MBD	MRM	NA		-1	1	1	Decrease		0 (1)	-0.4 (0.82)	0.23 (0.68)	-0.04 (0.09)	-0.41 (0.09)	0.26 (0.07)	0.36	0.00556	-0.3	0.01304	-0.66	0	-0.21 (0.72)	-0.46 (0.83)	-0.7 (0.95)	-0.28 (0.12)	-0.45 (0.15)	-0.71 (0.17)	0.18	0.35291	0.43	0.04384	0.25	0.26914	-0.22	0.0641	Decrease non-linear	0.38 (0.76)	0.26 (0.66)	0.14 (0.68)	0.42 (0.16)	0.29 (0.09)	0.13 (0.09)	0.13	0.48359	0.29
696	DOCK10	DOCK10	Q96BY6	310	EMIF-AD MBD	MRM	NA		0	0	0			0 (1)	0.22 (1.2)	0.02 (0.98)	0.05 (0.12)	0.23 (0.12)	-0.01 (0.09)	-0.19	0.27143	0.06	0.70623	0.24	0.09737	-0.01 (1.01)	0.35 (1.28)	0.55 (1.39)	0.04 (0.18)	0.34 (0.21)	0.55 (0.26)	-0.3	0.28757	-0.5	0.10749	-0.2	0.54189	0.27	0.1338		0.01 (0.94)	-0.06 (1.02)	0.11 (0.97)	-0.02 (0.23)	-0.08 (0.13)	0.11 (0.13)	0.06	0.822	-0.13
698	DPP10	DPP10	Q8N608	234	EMIF-AD MBD	MRM	NA		-1	1	1			0 (1)	-0.41 (0.96)	0.31 (0.83)	-0.05 (0.12)	-0.43 (0.11)	0.35 (0.09)	0.38	0.02404	-0.4	0.0122	-0.78	0	-0.25 (0.83)	-0.38 (0.89)	-0.8 (1.23)	-0.35 (0.17)	-0.38 (0.2)	-0.76 (0.23)	0.04	0.88773	0.42	0.14056	0.38	0.20456	-0.21	0.1915		0.52 (0.85)	0.38 (0.78)	0.16 (0.87)	0.59 (0.24)	0.4 (0.11)	0.17 (0.13)	0.18	0.4884	0.42
701	DPP6	DPP6	P42658	303	EMIF-AD MBD	MRM	NA		0	1	1	Decrease		0 (1)	-0.29 (1)	0.42 (0.86)	0 (0.11)	-0.3 (0.11)	0.43 (0.08)	0.3	0.05422	-0.43	0.00261	-0.72	0	-0.13 (0.81)	-0.16 (0.9)	-0.81 (1.33)	-0.16 (0.15)	-0.16 (0.19)	-0.81 (0.22)	0	0.99703	0.66	0.01481	0.65	0.0244	-0.29	0.0385	Decrease linear	0.5 (1)	0.48 (0.78)	0.33 (0.89)	0.52 (0.2)	0.49 (0.11)	0.33 (0.11)	0.02	0.92622	0.19
702	DPP7	DPP7	Q9UHL4	310	EMIF-AD MBD	MRM	NA		0	0	0			0 (1)	-0.06 (1.21)	0.11 (0.92)	-0.11 (0.12)	-0.07 (0.11)	0.17 (0.08)	-0.04	0.79909	-0.28	0.06166	-0.24	0.09226	0.02 (1.55)	-0.06 (0.66)	-0.22 (1.03)	-0.1 (0.17)	-0.05 (0.21)	-0.24 (0.25)	-0.04	0.86803	0.15	0.62173	0.19	0.54872	-0.07	0.7076		0.41 (0.97)	0.07 (0.86)	0.04 (0.95)	0.46 (0.22)	0.14 (0.13)	0.02 (0.13)	0.33	0.19904	0.45
703	DPT	DPT	Q07507	212	EMIF-AD MBD	MRM	NA		0	1	0			0 (1)	0.33 (1.05)	0.44 (0.96)	0.04 (0.14)	0.35 (0.14)	0.41 (0.1)	-0.31	0.11529	-0.37	0.03946	-0.06	0.72072	0.34 (1.14)	0.53 (1.09)	-0.01 (0.67)	0.42 (0.2)	0.54 (0.26)	0.02 (0.33)	-0.12	0.70716	0.4	0.29793	0.52	0.21177	-0.18	0.3782		0.43 (1.66)	0.52 (0.83)	0.34 (0.82)	0.39 (0.28)	0.47 (0.14)	0.36 (0.16)	-0.08	0.79929	0.03
704	DPYSL2	DPYSL2	Q16555	103	EMIF-AD MBD	MRM	NA		0	1	0			0 (1)	0.4 (1.11)	0.82 (0.89)	0.11 (0.23)	0.41 (0.2)	0.79 (0.12)	-0.3	0.32139	-0.68	0.01298	-0.38	0.10893	0.21 (1)	0.29 (0.75)	1.46 (2.01)	0.24 (0.28)	0.31 (0.33)	1.38 (0.55)	-0.06	0.88543	-1.14	0.07022	-1.08	0.09803	0.36	0.2989		0.41 (1.05)	0.89 (0.9)	0.81 (0.84)	0.44 (0.42)	0.87 (0.16)	0.82 (0.22)	-0.43	0.34314	-0.38
705	DRAXIN	DRAXIN	Q8NBI3	141	EMIF-AD MBD	MRM	NA		0	0	0			0 (1)	-0.15 (0.73)	0.15 (0.95)	-0.06 (0.16)	-0.15 (0.16)	0.19 (0.12)	0.09	0.70831	-0.25	0.2349	-0.34	0.09156	-0.11 (0.79)	-0.23 (0.69)	-0.06 (0.8)	-0.18 (0.26)	-0.24 (0.25)	-0.07 (0.35)	0.07	0.85309	-0.1	0.81092	-0.17	0.69008	-0.06	0.7417		0.28 (1.13)	0.03 (0.96)	0.27 (0.88)	0.34 (0.29)	0.05 (0.16)	0.26 (0.18)	0.29	0.38613	0.08
706	DSC1	DSC1	Q08554	96	EMIF-AD MBD	MRM	NA		0	0	0			0 (1)	0.31 (0.86)	-0.1 (1.17)	0.09 (0.22)	0.29 (0.25)	-0.15 (0.16)	-0.2	0.56245	0.24	0.40798	0.44	0.13884	0.52 (1.22)	0.22 (0.32)	0.05 (0.18)	0.61 (0.38)	0.14 (0.56)	0.06 (0.45)	0.47	0.49337	0.55	0.35822	0.08	0.91439	-0.27	0.2596		-0.59 (1.6)	0.03 (1.09)	-0.14 (1.19)	-0.64 (0.5)	-0.04 (0.23)	-0.07 (0.26)	-0.6	0.28727	-0.57
707	DSC2	DSC2	Q02487	310	EMIF-AD MBD	MRM	NA		0	0	1			0 (1)	-0.18 (1.06)	0.31 (0.95)	0.09 (0.12)	-0.18 (0.11)	0.27 (0.08)	0.27	0.09219	-0.18	0.22378	-0.45	0.00139	-0.34 (1.13)	0.1 (0.87)	-0.26 (1.12)	-0.3 (0.17)	0.1 (0.2)	-0.24 (0.24)	-0.4	0.13171	-0.05	0.85212	0.34	0.27345	0.05	0.7497		0.15 (1.12)	0.3 (0.93)	0.38 (0.91)	0.13 (0.22)	0.27 (0.12)	0.4 (0.13)	-0.13	0.58689	-0.26
708	DSC3	DSC3	Q14574	250	EMIF-AD MBD	MRM	NA		0	0	2			0 (1)	0.21 (0.8)	-0.13 (0.93)	0.03 (0.12)	0.21 (0.13)	-0.14 (0.08)	-0.18	0.30208	0.17	0.27034	0.35	0.02112	0.16 (0.81)	0.23 (1.06)	0.27 (0.23)	0.19 (0.19)	0.21 (0.22)	0.31 (0.25)	-0.02	0.93564	-0.12	0.69635	-0.1	0.77067	0.07	0.6336		-0.22 (1.09)	-0.16 (0.9)	-0.04 (0.9)	-0.22 (0.2)	-0.19 (0.12)	-0.03 (0.13)	-0.04	0.878	-0.2
710	DSG2	DSG2	Q14126	302	EMIF-AD MBD	MRM	NA		0	0	0			0 (1)	-0.1 (0.88)	0.13 (0.8)	0 (0.11)	-0.1 (0.1)	0.12 (0.08)	0.1	0.47633	-0.12	0.38682	-0.22	0.07896	-0.1 (0.8)	-0.02 (1.01)	-0.21 (0.89)	-0.1 (0.14)	-0.02 (0.17)	-0.22 (0.2)	-0.08	0.71014	0.11	0.65621	0.19	0.46697	-0.05	0.6893		0.12 (1.06)	0.22 (0.79)	0.02 (0.73)	0.12 (0.19)	0.23 (0.1)	0.02 (0.11)	-0.11	0.61708	0.1
711	DSP	DSP	P15924	110	EMIF-AD MBD	MRM	NA		0	0	0			0 (1)	0.28 (0.81)	-0.18 (1.12)	0.04 (0.2)	0.29 (0.21)	-0.21 (0.14)	-0.25	0.38265	0.25	0.33478	0.5	0.05253	0.33 (0.98)	0.53 (0.47)	0.04 (0.55)	0.36 (0.3)	0.5 (0.53)	0.02 (0.4)	-0.14	0.82467	0.34	0.51018	0.48	0.47175	-0.21	0.3999		-0.37 (1)	-0.33 (1.03)	0.04 (1.25)	-0.37 (0.35)	-0.38 (0.23)	0.09 (0.23)	0.01	0.98017	-0.46
713	DTD1	DTD1	Q8TEA8	272	EMIF-AD MBD	MRM	NA		-1	1	1			0 (1)	-0.36 (0.94)	0.61 (0.89)	0.04 (0.12)	-0.36 (0.11)	0.59 (0.08)	0.4	0.01604	-0.55	0.00026	-0.95	0	-0.33 (0.95)	-0.28 (0.66)	-0.51 (1.22)	-0.34 (0.17)	-0.28 (0.2)	-0.5 (0.23)	-0.07	0.7986	0.16	0.56889	0.23	0.45157	-0.08	0.5911		0.64 (1.15)	0.74 (0.76)	0.45 (0.92)	0.66 (0.22)	0.74 (0.12)	0.44 (0.12)	-0.09	0.7224	0.21
717	ECM1	ECM1	Q16610	310	EMIF-AD MBD	MRM	NA		-1	0	1			0 (1)	-0.39 (0.71)	0.25 (0.79)	0.05 (0.1)	-0.39 (0.09)	0.22 (0.07)	0.44	0.00119	-0.17	0.17752	-0.61	0	-0.25 (0.82)	-0.51 (0.56)	-0.51 (0.65)	-0.22 (0.13)	-0.51 (0.15)	-0.5 (0.18)	0.28	0.15966	0.27	0.22177	-0.01	0.96529	-0.15	0.1596		0.38 (0.63)	0.35 (0.78)	0.09 (0.82)	0.38 (0.17)	0.33 (0.09)	0.09 (0.1)	0.05	0.80718	0.28
718	ECM2	ECM2	O94769	310	EMIF-AD MBD	MRM	NA		0	1	0			0 (1)	0.07 (0.99)	0.25 (0.94)	-0.1 (0.11)	0.07 (0.11)	0.3 (0.08)	-0.17	0.28076	-0.4	0.00569	-0.23	0.08983	0.28 (1.11)	-0.28 (0.78)	0.14 (0.88)	0.24 (0.16)	-0.28 (0.19)	0.12 (0.23)	0.52	0.04112	0.11	0.68195	-0.4	0.1802	-0.12	0.4006		0.1 (0.69)	0.27 (0.9)	0.28 (1.05)	0.1 (0.21)	0.31 (0.12)	0.27 (0.12)	-0.2	0.3935	-0.16
719	EDIL3	EDIL3	O43854	124	EMIF-AD MBD	MRM	NA		0	0	0			0 (1)	-0.09 (0.63)	0.11 (0.99)	-0.07 (0.16)	-0.07 (0.19)	0.15 (0.12)	0	0.99461	-0.22	0.30991	-0.21	0.33874	0.06 (0.7)	-0.19 (0.54)	-0.31 (0.61)	0.05 (0.24)	-0.2 (0.33)	-0.32 (0.39)	0.26	0.53622	0.37	0.42876	0.11	0.82555	-0.22	0.2085		-0.44 (1.16)	0.53 (0.96)	-0.03 (0.85)	-0.42 (0.28)	0.57 (0.19)	-0.07 (0.17)	-1	0.00376	-0.35
720	EDN1	EDN1	P05305	270	ADNI	RBM	0		0	0	0	Decrease		0 (1)	0.23 (1.25)	0.31 (1.12)	0 (0.16)	0.23 (0.12)	0.3 (0.1)	-0.23	0.254	-0.3	0.11285	-0.07	0.6408	0.67 (1.73)	0.32 (0.92)	-0.37 (1.14)	0.67 (0.25)	0.33 (0.17)	-0.37 (0.25)	0.34	0.26318	1.04	0.00362	0.7	0.01926	-0.5	0.0079	Decrease linear	0.18 (1.17)	0.38 (1.17)	0.23 (1.04)	0.19 (0.34)	0.37 (0.14)	0.23 (0.18)	-0.18	0.61953	-0.04
721	EDN3	EDN3	P14138	223	EMIF-AD MBD	MRM	NA		-1	0	0			0 (1)	-0.38 (0.76)	-0.16 (0.85)	0 (0.12)	-0.38 (0.11)	-0.16 (0.09)	0.38	0.02142	0.16	0.30954	-0.22	0.13125	-0.32 (0.72)	-0.65 (0.39)	-0.23 (1.04)	-0.33 (0.16)	-0.65 (0.21)	-0.24 (0.21)	0.32	0.22242	-0.09	0.72432	-0.41	0.169	0	0.9997		-0.47 (0.92)	-0.09 (0.74)	-0.14 (0.93)	-0.47 (0.21)	-0.08 (0.12)	-0.14 (0.13)	-0.39	0.11316	-0.33
727	EFCAB14	EFCAB14	O75071	310	EMIF-AD MBD	MRM	NA		-1	0	1			0 (1)	-0.48 (0.78)	0.22 (0.8)	0.02 (0.1)	-0.48 (0.1)	0.21 (0.07)	0.5	0.00034	-0.19	0.1478	-0.69	0	-0.41 (0.71)	-0.51 (0.88)	-0.59 (0.81)	-0.41 (0.14)	-0.51 (0.16)	-0.59 (0.19)	0.1	0.63596	0.19	0.42968	0.09	0.7347	-0.12	0.2965		0.17 (0.77)	0.32 (0.78)	0.13 (0.82)	0.17 (0.17)	0.31 (0.1)	0.13 (0.1)	-0.15	0.46615	0.04
728	EFEMP1	EFEMP1	Q12805	249	ADNI	MRM	1	2	-1	1	1			0 (0.94)	-0.48 (0.92)	0.31 (0.99)	-0.04 (0.12)	-0.52 (0.09)	0.32 (0.08)	0.48	0.00188	-0.36	0.01458	-0.84	0	-0.42 (0.75)	-0.5 (1.01)	-0.48 (0.91)	-0.4 (0.19)	-0.58 (0.13)	-0.55 (0.19)	0.19	0.42898	0.15	0.5798	-0.04	0.8745	-0.06	0.6597		0.47 (1.47)	0.36 (0.85)	0.21 (1.03)	0.21 (0.25)	0.38 (0.11)	0.24 (0.13)	-0.17	0.53361	-0.03
729	EFEMP1	EFEMP1	Q12805	310	EMIF-AD MBD	MRM	NA	1	0	1	1			0 (1)	-0.04 (0.94)	0.57 (0.8)	0.07 (0.1)	-0.04 (0.1)	0.53 (0.07)	0.11	0.42841	-0.46	0.00068	-0.57	1e-05	0.06 (1.05)	-0.18 (0.71)	-0.04 (1.01)	0.1 (0.15)	-0.18 (0.17)	-0.03 (0.21)	0.27	0.23109	0.12	0.62483	-0.15	0.58091	-0.09	0.512		0.63 (0.87)	0.55 (0.79)	0.57 (0.81)	0.62 (0.19)	0.51 (0.11)	0.59 (0.11)	0.11	0.62248	0.03
730	EFEMP2	EFEMP2	O95967	310	EMIF-AD MBD	MRM	NA		0	0	1			0 (1)	-0.21 (1.05)	0.15 (0.83)	0.02 (0.11)	-0.21 (0.11)	0.14 (0.08)	0.23	0.13156	-0.12	0.39816	-0.35	0.009	-0.1 (1.28)	-0.24 (0.89)	-0.4 (0.7)	-0.1 (0.16)	-0.24 (0.19)	-0.39 (0.22)	0.14	0.57884	0.29	0.28532	0.16	0.59566	-0.13	0.4166		0.25 (0.86)	0.17 (0.8)	0.08 (0.87)	0.26 (0.2)	0.17 (0.11)	0.08 (0.12)	0.09	0.70527	0.18
733	EFNA1	EFNA1	P20827	303	EMIF-AD MBD	MRM	NA		0	1	1			0 (1)	-0.07 (0.87)	0.28 (0.68)	0.03 (0.1)	-0.08 (0.09)	0.27 (0.07)	0.11	0.42493	-0.24	0.04772	-0.35	0.00272	-0.1 (0.82)	0.1 (0.81)	-0.25 (1.02)	-0.12 (0.13)	0.11 (0.15)	-0.24 (0.18)	-0.23	0.25887	0.12	0.58209	0.35	0.14395	-0.04	0.7687		0.42 (0.8)	0.24 (0.64)	0.29 (0.69)	0.44 (0.17)	0.23 (0.09)	0.29 (0.09)	0.21	0.26035	0.15
734	EFNA3	EFNA3	P52797	310	EMIF-AD MBD	MRM	NA		-1	1	1			0 (1)	-0.39 (0.97)	0.29 (0.78)	-0.02 (0.1)	-0.4 (0.1)	0.31 (0.07)	0.38	0.00827	-0.33	0.0121	-0.71	0	-0.23 (0.89)	-0.43 (0.88)	-0.7 (1.21)	-0.28 (0.14)	-0.42 (0.17)	-0.7 (0.2)	0.15	0.51588	0.43	0.08604	0.28	0.28987	-0.21	0.1379		0.49 (0.98)	0.31 (0.76)	0.2 (0.73)	0.52 (0.18)	0.33 (0.1)	0.2 (0.11)	0.19	0.36365	0.32
735	EFNA5	EFNA5	P52803	99	EMIF-AD MBD	MRM	NA		0	0	0	Decrease		0 (1)	-0.06 (0.99)	0.09 (0.81)	-0.07 (0.2)	-0.09 (0.19)	0.14 (0.13)	0.02	0.93227	-0.2	0.41492	-0.23	0.32557	-0.01 (0.65)	0.25 (1.37)	-1.13 (0.19)	-0.08 (0.25)	0.24 (0.3)	-1.22 (0.51)	-0.31	0.42584	1.14	0.04347	1.45	0.01582	-0.28	0.3597	Decrease non-linear	0.3 (0.77)	0.14 (0.84)	0.01 (0.81)	0.38 (0.4)	0.17 (0.18)	0.01 (0.17)	0.21	0.63941	0.37
736	EFNB1	EFNB1	P98172	295	EMIF-AD MBD	MRM	NA		0	0	1			0 (1)	-0.21 (0.86)	0.23 (0.95)	0.02 (0.12)	-0.21 (0.11)	0.22 (0.08)	0.23	0.14313	-0.2	0.17907	-0.43	0.00166	-0.21 (0.93)	-0.21 (0.88)	-0.2 (0.69)	-0.23 (0.16)	-0.21 (0.19)	-0.19 (0.23)	-0.02	0.93918	-0.04	0.88872	-0.02	0.94565	-0.01	0.9199		0.43 (0.83)	0.3 (1.06)	0.09 (0.85)	0.45 (0.21)	0.3 (0.12)	0.09 (0.12)	0.14	0.55562	0.35
737	EFNB2	EFNB2	P52799	310	EMIF-AD MBD	MRM	NA		-1	1	1	Decrease		0 (1)	-0.5 (0.88)	0.31 (0.74)	-0.01 (0.1)	-0.51 (0.1)	0.32 (0.07)	0.49	0.00039	-0.33	0.00886	-0.83	0	-0.3 (0.82)	-0.56 (0.84)	-0.85 (0.97)	-0.34 (0.13)	-0.55 (0.16)	-0.86 (0.19)	0.21	0.30507	0.52	0.02534	0.31	0.218	-0.26	0.0431	Decrease linear	0.43 (0.84)	0.35 (0.68)	0.22 (0.76)	0.46 (0.17)	0.37 (0.1)	0.21 (0.1)	0.08	0.66909	0.24
738	EFNB3	EFNB3	Q15768	165	EMIF-AD MBD	MRM	NA		0	0	0	Decrease		0 (1)	-0.01 (1)	0.25 (1.02)	0.05 (0.18)	0.01 (0.16)	0.22 (0.11)	0.05	0.84821	-0.16	0.46443	-0.21	0.28313	-0.11 (0.66)	0.74 (0.84)	-0.78 (1.2)	-0.1 (0.23)	0.8 (0.28)	-0.79 (0.32)	-0.89	0.01622	0.7	0.08217	1.59	0.00034	-0.28	0.1819	Decrease non-linear	0.01 (1.08)	0.4 (0.88)	0.09 (1.18)	0.02 (0.32)	0.38 (0.14)	0.09 (0.17)	-0.36	0.31626	-0.07
740	EGFR	EGFR	P00533	233	EMIF-AD MBD	MRM	NA		-1	0	1			0 (1)	-0.38 (0.96)	0.01 (1)	-0.02 (0.14)	-0.39 (0.13)	0.03 (0.09)	0.37	0.04705	-0.05	0.76468	-0.42	0.00805	-0.3 (1.03)	-0.44 (1.03)	-0.44 (0.75)	-0.37 (0.21)	-0.43 (0.22)	-0.45 (0.26)	0.06	0.85286	0.08	0.81014	0.02	0.94624	-0.03	0.8718		-0.14 (1.07)	0.16 (0.98)	-0.1 (1)	-0.09 (0.26)	0.19 (0.14)	-0.11 (0.14)	-0.28	0.33369	0.01
741	EGLN2	EGLN2	Q96KS0	93	EMIF-AD MBD	MRM	NA		0	0	0			0 (1)	0.19 (1.09)	0.07 (1.11)	0.05 (0.22)	0.21 (0.21)	0.02 (0.18)	-0.16	0.60409	0.03	0.93144	0.19	0.49959	0.59 (1.13)	-0.07 (1.13)	-0.31 (0.74)	0.72 (0.33)	-0.14 (0.39)	-0.32 (0.45)	0.86	0.10621	1.04	0.06699	0.18	0.75544	-0.52	0.0648		-0.08 (1.64)	-0.23 (0.7)	0.37 (1.27)	-0.12 (0.55)	-0.28 (0.27)	0.38 (0.26)	0.15	0.80489	-0.5
742	EHBP1L1	EHBP1L1	Q8N3D4	132	EMIF-AD MBD	MRM	NA		0	0	0			0 (1)	-0.1 (1.08)	-0.11 (0.96)	0.04 (0.18)	-0.11 (0.2)	-0.13 (0.12)	0.15	0.59314	0.17	0.46464	0.02	0.92987	-0.1 (0.65)	0.14 (1.55)	-0.45 (0.88)	-0.1 (0.32)	0.13 (0.34)	-0.47 (0.41)	-0.23	0.62008	0.37	0.4792	0.6	0.26069	-0.12	0.6915		-0.2 (0.87)	0 (1)	-0.25 (0.94)	-0.3 (0.39)	0.03 (0.17)	-0.26 (0.2)	-0.33	0.4403	-0.04
744	EIF4G3	EIF4G3	O43432	204	EMIF-AD MBD	MRM	NA		0	0	2	Increase		0 (1)	0.42 (1.41)	0.02 (0.92)	0.07 (0.15)	0.43 (0.15)	-0.03 (0.12)	-0.37	0.08293	0.09	0.64397	0.46	0.0174	-0.1 (0.99)	0.74 (1.58)	0.99 (1.62)	-0.04 (0.23)	0.74 (0.28)	0.99 (0.3)	-0.78	0.03373	-1.03	0.0073	-0.24	0.5501	0.5	0.0358	Increase linear	0.13 (0.79)	0.02 (1.01)	-0.01 (0.88)	0.11 (0.32)	-0.01 (0.18)	-0.01 (0.18)	0.12	0.73888	0.12
748	ELN	ELN	P15502	203	EMIF-AD MBD	MRM	NA		0	0	0			0 (1)	-0.03 (0.99)	0.28 (1.09)	-0.02 (0.16)	-0.03 (0.15)	0.29 (0.11)	0.01	0.95031	-0.31	0.11997	-0.32	0.08262	-0.09 (1.04)	-0.13 (1.09)	0.28 (0.6)	-0.13 (0.24)	-0.11 (0.25)	0.28 (0.35)	-0.01	0.96712	-0.41	0.33815	-0.4	0.36133	-0.05	0.8006		-0.18 (1.03)	0.41 (0.97)	0.25 (1.22)	-0.17 (0.32)	0.43 (0.15)	0.24 (0.17)	-0.6	0.09522	-0.41
751	EMILIN1	EMILIN1	Q9Y6C2	257	EMIF-AD MBD	MRM	NA		0	0	1		Increase	0 (1)	0 (1.12)	0.55 (0.96)	0.18 (0.13)	0.01 (0.12)	0.45 (0.09)	0.17	0.32656	-0.27	0.10072	-0.44	0.00446	-0.19 (1.04)	0.09 (1.14)	0.24 (1.23)	0.02 (0.19)	0.06 (0.21)	0.29 (0.25)	-0.04	0.89558	-0.27	0.38316	-0.23	0.47896	0.08	0.6096		0.33 (0.89)	0.42 (0.9)	0.78 (1.02)	0.23 (0.23)	0.3 (0.13)	0.82 (0.13)	-0.07	0.79131	-0.59
752	EMILIN2	EMILIN2	Q9BXX0	205	EMIF-AD MBD	MRM	NA		0	0	0	Decrease		0 (1)	-0.02 (0.98)	-0.01 (0.8)	0.02 (0.13)	-0.03 (0.13)	-0.01 (0.09)	0.05	0.79708	0.03	0.8758	-0.02	0.89745	0.11 (0.99)	0.13 (0.82)	-0.61 (1.1)	0.13 (0.18)	0.13 (0.2)	-0.62 (0.27)	0	0.99816	0.75	0.0227	0.75	0.02801	-0.35	0.0601	Decrease non-linear	-0.09 (0.95)	0.12 (0.67)	-0.12 (0.87)	-0.09 (0.21)	0.11 (0.13)	-0.12 (0.14)	-0.2	0.40418	0.02
753	EMILIN3	EMILIN3	Q9NT22	102	EMIF-AD MBD	MRM	NA		0	0	0			0 (1)	-0.08 (1.24)	-0.35 (1.04)	-0.09 (0.22)	-0.17 (0.22)	-0.26 (0.15)	0.08	0.8036	0.17	0.53631	0.1	0.72504	-0.22 (1.09)	-0.12 (1.52)	0.21 (1.2)	-0.44 (0.37)	-0.15 (0.37)	0.05 (0.46)	-0.29	0.58467	-0.49	0.40628	-0.2	0.73474	0.37	0.2637		-0.38 (0.9)	-0.29 (1.14)	-0.41 (1.03)	-0.27 (0.35)	-0.16 (0.23)	-0.46 (0.27)	-0.11	0.78632	0.18
754	ENDOD1	ENDOD1	O94919	310	EMIF-AD MBD	MRM	NA		-1	1	1			0 (1)	-0.34 (0.84)	0.39 (0.73)	0.03 (0.1)	-0.35 (0.09)	0.38 (0.07)	0.37	0.00566	-0.35	0.00537	-0.72	0	-0.16 (0.79)	-0.45 (0.81)	-0.57 (0.96)	-0.17 (0.13)	-0.44 (0.16)	-0.57 (0.18)	0.28	0.17124	0.4	0.07674	0.12	0.61459	-0.22	0.0826		0.57 (0.72)	0.41 (0.74)	0.3 (0.71)	0.58 (0.17)	0.4 (0.09)	0.3 (0.1)	0.18	0.34761	0.28
756	ENO1	ENO1	P06733	310	EMIF-AD MBD	MRM	NA		0	1	1			0 (1)	-0.04 (0.86)	0.66 (1.03)	0.01 (0.11)	-0.05 (0.11)	0.66 (0.08)	0.06	0.71679	-0.65	1e-05	-0.71	0	0.15 (0.81)	-0.32 (0.85)	-0.07 (0.93)	0.13 (0.17)	-0.31 (0.2)	-0.06 (0.24)	0.45	0.08607	0.2	0.49425	-0.25	0.41823	-0.15	0.2369		0.45 (1.25)	0.73 (0.97)	0.65 (1.03)	0.47 (0.21)	0.73 (0.12)	0.65 (0.12)	-0.26	0.28462	-0.18
757	ENO2	ENO2	P09104	249	ADNI	MRM	0	2	0	1	1			0 (1)	0 (1.26)	1.11 (0.96)	0 (0.15)	-0.01 (0.12)	1.1 (0.1)	0.01	0.95536	-1.1	0	-1.11	0	-0.01 (1.61)	0.15 (1.07)	-0.3 (1.26)	0 (0.25)	0.14 (0.17)	-0.32 (0.24)	-0.15	0.63036	0.32	0.36474	0.46	0.11706	-0.13	0.5173		1.15 (0.56)	1.17 (0.98)	1.01 (1.03)	1.16 (0.32)	1.16 (0.14)	1.01 (0.17)	0	0.99978	0.15
758	ENO2	ENO2	P09104	310	EMIF-AD MBD	MRM	NA	1	0	1	1			0 (1)	-0.2 (0.93)	0.78 (0.85)	-0.06 (0.11)	-0.21 (0.1)	0.82 (0.08)	0.15	0.30868	-0.88	0	-1.03	0	-0.03 (0.86)	-0.25 (0.84)	-0.49 (1.17)	-0.11 (0.15)	-0.25 (0.18)	-0.51 (0.21)	0.14	0.54634	0.4	0.12158	0.26	0.34754	-0.23	0.0946		0.69 (0.92)	0.79 (0.73)	0.8 (0.95)	0.72 (0.19)	0.83 (0.11)	0.78 (0.11)	-0.11	0.6212	-0.06
759	ENO2_LGAEVYHTLK	ENO2	P09104	249	ADNI	MRM	0	2	0	1	1			0 (1)	0.03 (0.76)	0.38 (0.32)	-0.01 (0.09)	0.01 (0.07)	0.37 (0.06)	-0.02	0.89655	-0.38	0.00092	-0.36	0.00017	0.08 (0.31)	-0.03 (1.02)	0.11 (0.33)	0.09 (0.12)	-0.06 (0.09)	0.08 (0.12)	0.14	0.3504	0	0.99273	-0.14	0.3417	0	0.9972		0.55 (0.31)	0.37 (0.29)	0.33 (0.35)	0.51 (0.16)	0.37 (0.07)	0.34 (0.09)	0.14	0.43649	0.17
762	ENPP2	ENPP2	Q13822	249	ADNI	MRM	1	2	0	1	0			0 (0.92)	0.24 (0.84)	0.36 (0.97)	0.01 (0.13)	0.26 (0.1)	0.36 (0.09)	-0.25	0.128	-0.35	0.02523	-0.1	0.44881	0.34 (0.9)	0.13 (0.81)	0.37 (0.87)	0.32 (0.21)	0.18 (0.14)	0.42 (0.2)	0.14	0.58698	-0.1	0.73241	-0.24	0.33494	0.05	0.7038		0.47 (0.93)	0.33 (0.96)	0.37 (1.03)	0.56 (0.27)	0.34 (0.12)	0.36 (0.14)	0.23	0.43977	0.21
763	ENPP2	ENPP2	Q13822	310	EMIF-AD MBD	MRM	NA	1	1	0	2			0 (1)	0.3 (1.14)	-0.12 (0.86)	-0.18 (0.11)	0.28 (0.1)	-0.01 (0.08)	-0.47	0.00193	-0.17	0.22328	0.3	0.02209	0.5 (1.24)	0.11 (1.02)	0.14 (1.06)	0.31 (0.15)	0.13 (0.18)	0.11 (0.22)	0.18	0.45336	0.2	0.46115	0.02	0.95465	-0.07	0.6182		-0.28 (0.87)	-0.16 (0.86)	-0.03 (0.87)	-0.18 (0.2)	-0.05 (0.11)	-0.07 (0.11)	-0.13	0.54803	-0.12
764	ENPP4	ENPP4	Q9Y6X5	218	EMIF-AD MBD	MRM	NA		0	1	1			0 (1)	-0.06 (0.86)	0.3 (0.87)	-0.06 (0.12)	-0.07 (0.13)	0.34 (0.09)	0.01	0.97575	-0.4	0.01216	-0.41	0.00942	-0.12 (0.8)	0.03 (0.96)	-0.09 (0.85)	-0.3 (0.21)	0.06 (0.2)	-0.08 (0.24)	-0.36	0.219	-0.22	0.48294	0.14	0.66148	0.07	0.6774		0.33 (0.72)	0.32 (0.87)	0.27 (0.91)	0.41 (0.25)	0.35 (0.12)	0.27 (0.13)	0.05	0.847	0.14
765	ENPP5	ENPP5	Q9UJA9	152	EMIF-AD MBD	MRM	NA		0	0	1		Decrease	0 (1)	-0.22 (0.77)	0.31 (1.15)	-0.04 (0.19)	-0.21 (0.19)	0.33 (0.12)	0.17	0.52701	-0.37	0.11262	-0.54	0.01567	-0.26 (0.78)	-0.12 (0.88)	-0.32 (0.63)	-0.32 (0.27)	-0.09 (0.32)	-0.35 (0.47)	-0.23	0.59305	0.03	0.96011	0.25	0.65826	0.02	0.8998		0.87 (1.12)	0.39 (1.22)	0.02 (1.02)	0.89 (0.32)	0.42 (0.17)	0.01 (0.19)	0.47	0.19352	0.88
766	ENPP6	ENPP6	Q6UWR7	243	EMIF-AD MBD	MRM	NA		0	0	0			0 (1)	-0.05 (0.75)	-0.01 (0.81)	-0.15 (0.11)	-0.06 (0.11)	0.08 (0.08)	-0.09	0.56052	-0.23	0.10367	-0.14	0.28853	0.03 (0.73)	-0.08 (0.87)	-0.2 (0.68)	-0.09 (0.14)	-0.05 (0.2)	-0.21 (0.22)	-0.04	0.87925	0.12	0.63903	0.16	0.58561	-0.04	0.7532		0.04 (1.05)	-0.01 (0.7)	-0.03 (0.86)	0.07 (0.2)	0.07 (0.11)	-0.05 (0.11)	0	0.9839	0.12
768	ENTPD6	ENTPD6	O75354	114	EMIF-AD MBD	MRM	NA		0	0	0			0 (1)	0.12 (0.94)	-0.2 (0.97)	-0.06 (0.21)	0.11 (0.18)	-0.17 (0.12)	-0.17	0.54501	0.12	0.64625	0.29	0.20403	-0.18 (1.09)	0.54 (0.92)	0.2 (0.38)	-0.19 (0.27)	0.53 (0.35)	0.2 (0.37)	-0.72	0.10701	-0.38	0.40341	0.34	0.50697	0.23	0.314		-0.39 (1.01)	-0.24 (1.01)	-0.05 (0.94)	-0.39 (0.29)	-0.22 (0.2)	-0.06 (0.2)	-0.17	0.63441	-0.33
773	EPDR1	EPDR1	Q9UM22	310	EMIF-AD MBD	MRM	NA		0	1	1			0 (1)	-0.12 (1.09)	0.29 (0.99)	-0.11 (0.12)	-0.13 (0.11)	0.35 (0.08)	0.02	0.887	-0.46	0.00215	-0.49	0.00068	0.12 (1.02)	-0.21 (1.06)	-0.51 (1.22)	-0.01 (0.17)	-0.2 (0.2)	-0.53 (0.24)	0.18	0.48903	0.52	0.08059	0.33	0.2929	-0.26	0.0992		0.37 (1.02)	0.24 (0.94)	0.32 (1.05)	0.44 (0.22)	0.31 (0.12)	0.29 (0.13)	0.13	0.60712	0.14
774	EPHA10	EPHA10	Q5JZY3	295	EMIF-AD MBD	MRM	NA		-1	1	1			0 (1)	-0.43 (0.94)	0.35 (0.95)	0.02 (0.12)	-0.44 (0.11)	0.34 (0.08)	0.45	0.00549	-0.32	0.03075	-0.78	0	-0.32 (0.84)	-0.48 (1.1)	-0.58 (0.95)	-0.33 (0.17)	-0.48 (0.2)	-0.58 (0.25)	0.15	0.55903	0.25	0.39366	0.1	0.74851	-0.12	0.4308		0.45 (0.9)	0.4 (0.92)	0.24 (1.01)	0.46 (0.21)	0.4 (0.12)	0.24 (0.13)	0.06	0.81125	0.21
776	EPHA4	EPHA4	P54764	310	EMIF-AD MBD	MRM	NA		-1	1	1	Decrease	Decrease	0 (1)	-0.63 (0.9)	0.31 (0.78)	-0.01 (0.1)	-0.63 (0.1)	0.31 (0.07)	0.63	1e-05	-0.32	0.01374	-0.95	0	-0.37 (0.74)	-0.68 (0.84)	-1.08 (1.1)	-0.41 (0.14)	-0.67 (0.16)	-1.08 (0.2)	0.26	0.22643	0.67	0.00511	0.41	0.10709	-0.33	0.0108	Decrease linear	0.48 (0.82)	0.39 (0.71)	0.16 (0.83)	0.51 (0.18)	0.4 (0.1)	0.15 (0.1)	0.1	0.60559	0.35
777	EPHA5	EPHA5	P54756	310	EMIF-AD MBD	MRM	NA		-1	1	1	Decrease	Decrease	0 (1)	-0.65 (0.91)	0.21 (0.87)	-0.05 (0.11)	-0.66 (0.1)	0.24 (0.08)	0.62	4e-05	-0.28	0.03603	-0.9	0	-0.42 (0.93)	-0.74 (0.86)	-1.03 (0.83)	-0.5 (0.15)	-0.73 (0.17)	-1.04 (0.21)	0.24	0.29481	0.54	0.03328	0.3	0.26617	-0.28	0.031	Decrease linear	0.42 (0.87)	0.33 (0.86)	0 (0.84)	0.46 (0.19)	0.37 (0.11)	-0.01 (0.11)	0.1	0.65203	0.48
779	EPHA7	EPHA7	Q15375	310	EMIF-AD MBD	MRM	NA		-1	0	1			0 (1)	-0.33 (0.82)	0.26 (0.78)	0.03 (0.1)	-0.33 (0.1)	0.24 (0.07)	0.36	0.0099	-0.21	0.09246	-0.57	0	-0.22 (0.65)	-0.29 (0.81)	-0.61 (1.09)	-0.23 (0.14)	-0.29 (0.16)	-0.6 (0.19)	0.06	0.76419	0.37	0.11061	0.31	0.21581	-0.18	0.1324		0.36 (0.86)	0.34 (0.7)	0.13 (0.83)	0.36 (0.17)	0.34 (0.1)	0.13 (0.1)	0.03	0.89463	0.24
780	EPHB2	EPHB2	P29323	273	EMIF-AD MBD	MRM	NA		0	0	0			0 (1)	-0.05 (1.39)	0.02 (1.09)	-0.01 (0.15)	-0.06 (0.14)	0.03 (0.1)	0.06	0.78374	-0.04	0.83579	-0.09	0.58793	-0.04 (1.32)	0.11 (1.05)	-0.26 (1.87)	-0.09 (0.22)	0.13 (0.26)	-0.26 (0.29)	-0.22	0.52201	0.17	0.6491	0.39	0.32275	-0.07	0.7345		-0.07 (1.1)	-0.06 (0.97)	0.14 (1.2)	-0.03 (0.29)	-0.05 (0.16)	0.14 (0.16)	0.02	0.94183	-0.17
782	EPHB6	EPHB6	O15197	310	EMIF-AD MBD	MRM	NA		-1	1	1	Decrease	Decrease	0 (1)	-0.45 (0.89)	0.3 (0.97)	-0.02 (0.11)	-0.46 (0.11)	0.32 (0.08)	0.44	0.00382	-0.34	0.01574	-0.78	0	-0.26 (0.79)	-0.46 (0.8)	-0.85 (1.11)	-0.33 (0.15)	-0.45 (0.19)	-0.85 (0.22)	0.12	0.61336	0.52	0.05273	0.4	0.16568	-0.29	0.0281	Decrease linear	0.42 (1.04)	0.45 (0.85)	0.09 (1.04)	0.46 (0.2)	0.47 (0.11)	0.09 (0.12)	-0.01	0.97831	0.38
784	ERAP1	ERAP1	Q9NZ08	310	EMIF-AD MBD	MRM	NA		0	0	1			0 (1)	-0.04 (1)	0.21 (0.87)	0 (0.11)	-0.05 (0.11)	0.22 (0.08)	0.05	0.75082	-0.22	0.12628	-0.26	0.04813	-0.02 (1.03)	0.08 (1.02)	-0.28 (0.94)	-0.06 (0.16)	0.09 (0.19)	-0.28 (0.22)	-0.15	0.53816	0.22	0.42279	0.37	0.20641	-0.08	0.5951		0.17 (0.71)	0.25 (0.96)	0.19 (0.83)	0.19 (0.2)	0.27 (0.11)	0.18 (0.12)	-0.07	0.74921	0.01
786	ERBB3	ERBB3	P21860	102	EMIF-AD MBD	MRM	NA		0	0	0			0 (1)	-0.27 (0.44)	-0.17 (0.5)	0.04 (0.13)	-0.26 (0.13)	-0.21 (0.11)	0.3	0.10125	0.25	0.17472	-0.06	0.73041	-0.34 (0.44)	-0.18 (0.33)	-0.29 (0.61)	-0.34 (0.15)	-0.18 (0.16)	-0.3 (0.19)	-0.17	0.4471	-0.04	0.85238	0.12	0.62285	0.02	0.8674		-0.15 (0.55)	0.01 (0.47)	-0.31 (0.48)	-0.14 (0.18)	0.02 (0.12)	-0.31 (0.1)	-0.16	0.47032	0.17
787	ERBB4	ERBB4	Q15303	122	EMIF-AD MBD	MRM	NA		0	0	0			0 (1)	0.04 (0.86)	0.26 (0.95)	-0.09 (0.19)	0.02 (0.16)	0.31 (0.12)	-0.11	0.6679	-0.4	0.09425	-0.29	0.14496	0.12 (0.99)	-0.2 (0.97)	0.16 (0.42)	0.01 (0.24)	-0.2 (0.29)	0.12 (0.31)	0.21	0.58486	-0.11	0.77486	-0.32	0.45481	0.03	0.865		0.35 (1.16)	0.23 (1.01)	0.27 (0.84)	0.42 (0.3)	0.29 (0.19)	0.26 (0.18)	0.13	0.70289	0.16
789	ERP44	ERP44	Q9BS26	217	EMIF-AD MBD	MRM	NA		0	0	1			0 (1)	-0.05 (0.94)	0.21 (0.77)	-0.06 (0.13)	-0.05 (0.11)	0.24 (0.09)	-0.01	0.95335	-0.3	0.05796	-0.29	0.04352	-0.15 (0.77)	-0.02 (1.2)	0.11 (0.93)	-0.25 (0.16)	-0.02 (0.19)	0.13 (0.24)	-0.23	0.34623	-0.38	0.18492	-0.15	0.62385	0.22	0.1743		0.38 (0.79)	0.26 (0.78)	0.12 (0.75)	0.35 (0.25)	0.32 (0.12)	0.12 (0.12)	0.03	0.9165	0.24
790	ESAM	ESAM	Q96AP7	289	EMIF-AD MBD	MRM	NA		-1	0	1	Decrease		0 (1)	-0.44 (0.98)	0.25 (1.03)	0.03 (0.12)	-0.46 (0.12)	0.24 (0.09)	0.48	0.00397	-0.22	0.16018	-0.7	0	-0.17 (0.69)	-0.6 (1.11)	-0.85 (1.21)	-0.21 (0.17)	-0.6 (0.21)	-0.85 (0.26)	0.39	0.14665	0.64	0.04237	0.25	0.45975	-0.33	0.0279	Decrease linear	0.5 (1)	0.31 (1.13)	0.08 (0.91)	0.53 (0.22)	0.32 (0.13)	0.09 (0.13)	0.21	0.3955	0.45
794	EXOC3L4	EXOC3L4	Q17RC7	307	EMIF-AD MBD	MRM	NA		0	0	0			0 (1)	0.16 (0.92)	-0.02 (0.67)	-0.09 (0.1)	0.15 (0.09)	0.04 (0.07)	-0.24	0.07621	-0.12	0.32589	0.12	0.31798	0.38 (0.67)	-0.21 (1.31)	0.22 (0.54)	0.27 (0.13)	-0.21 (0.15)	0.2 (0.18)	0.48	0.01615	0.08	0.72581	-0.4	0.08658	-0.04	0.7181		-0.17 (0.75)	-0.04 (0.75)	0.07 (0.55)	-0.12 (0.16)	0.02 (0.09)	0.05 (0.09)	-0.14	0.46427	-0.17
795	EXT1	EXT1	Q16394	192	EMIF-AD MBD	MRM	NA		0	0	0			0 (1)	-0.33 (0.85)	-0.07 (0.87)	0.01 (0.13)	-0.32 (0.13)	-0.08 (0.1)	0.33	0.07518	0.08	0.61996	-0.24	0.14115	-0.27 (0.68)	-0.38 (1.22)	-0.39 (0.72)	-0.29 (0.2)	-0.36 (0.24)	-0.4 (0.23)	0.07	0.81175	0.11	0.71851	0.03	0.91988	-0.07	0.6626		-0.36 (0.98)	-0.11 (0.67)	0.08 (1)	-0.36 (0.24)	-0.11 (0.14)	0.08 (0.14)	-0.25	0.36361	-0.44
796	EXT2	EXT2	Q93063	202	EMIF-AD MBD	MRM	NA		0	0	0	Decrease		0 (1)	-0.03 (0.92)	-0.06 (0.85)	0.03 (0.14)	-0.02 (0.12)	-0.08 (0.09)	0.06	0.75253	0.11	0.51983	0.05	0.72355	0.23 (0.85)	-0.27 (0.93)	-0.28 (0.99)	0.24 (0.17)	-0.28 (0.2)	-0.26 (0.27)	0.53	0.04855	0.51	0.11585	-0.02	0.9528	-0.32	0.0519	Decrease non-linear	-0.33 (0.9)	-0.11 (0.8)	0.08 (0.89)	-0.3 (0.26)	-0.12 (0.12)	0.08 (0.14)	-0.18	0.5389	-0.38
797	EXTL1	EXTL1	Q92935	98	EMIF-AD MBD	MRM	NA		0	0	0			0 (1)	-0.47 (0.79)	-0.07 (0.8)	-0.01 (0.17)	-0.48 (0.18)	-0.06 (0.14)	0.47	0.05296	0.05	0.82893	-0.42	0.06742	-0.34 (0.79)	-0.59 (0.83)	-0.57 (0.85)	-0.36 (0.24)	-0.56 (0.39)	-0.59 (0.26)	0.2	0.66133	0.23	0.51906	0.02	0.95857	-0.16	0.4029		-0.6 (0.94)	0.26 (0.72)	-0.23 (0.7)	-0.6 (0.3)	0.28 (0.18)	-0.23 (0.18)	-0.88	0.01323	-0.36
798	EXTL2	EXTL2	Q9UBQ6	249	ADNI	MRM	0	2	-1	1	1			0 (1)	-0.47 (1.09)	0.35 (1.05)	-0.04 (0.14)	-0.55 (0.11)	0.34 (0.09)	0.5	0.00371	-0.39	0.01903	-0.89	0	-0.47 (0.85)	-0.49 (1.2)	-0.42 (1.09)	-0.42 (0.21)	-0.62 (0.15)	-0.54 (0.21)	0.2	0.44051	0.12	0.69216	-0.08	0.74516	-0.03	0.8695		0.83 (0.64)	0.41 (0.95)	0.13 (1.24)	0.53 (0.28)	0.41 (0.12)	0.17 (0.15)	0.12	0.70008	0.36
799	EXTL2	EXTL2	Q9UBQ6	310	EMIF-AD MBD	MRM	NA	1	-1	1	1	Decrease	Decrease	0 (1)	-0.47 (0.94)	0.26 (0.75)	-0.05 (0.1)	-0.48 (0.1)	0.29 (0.07)	0.43	0.00243	-0.34	0.008	-0.77	0	-0.12 (0.78)	-0.68 (0.9)	-0.89 (1.11)	-0.19 (0.13)	-0.68 (0.16)	-0.9 (0.19)	0.48	0.02128	0.7	0.00273	0.22	0.38162	-0.37	0.0058	Decrease linear	0.46 (0.86)	0.34 (0.73)	0.11 (0.71)	0.5 (0.17)	0.37 (0.1)	0.1 (0.1)	0.12	0.52931	0.4
802	F10	F10	P00742	310	EMIF-AD MBD	MRM	NA		0	0	0			0 (1)	0.1 (1.21)	0.16 (1.15)	-0.04 (0.13)	0.1 (0.13)	0.18 (0.09)	-0.14	0.43697	-0.23	0.18002	-0.08	0.59906	-0.11 (1.27)	0.16 (1.21)	0.44 (1.06)	-0.14 (0.2)	0.16 (0.24)	0.42 (0.28)	-0.3	0.33905	-0.56	0.10536	-0.26	0.4779	0.27	0.1386		-0.26 (1.12)	0.16 (1.06)	0.31 (1.23)	-0.26 (0.25)	0.2 (0.14)	0.3 (0.15)	-0.45	0.11819	-0.55
803	F11	F11	P03951	280	EMIF-AD MBD	MRM	NA		0	0	0			0 (1)	0.07 (0.71)	-0.05 (0.73)	-0.04 (0.1)	0.06 (0.09)	-0.03 (0.07)	-0.11	0.43855	-0.02	0.89671	0.09	0.45665	-0.02 (0.76)	-0.03 (0.74)	0.36 (0.5)	-0.08 (0.13)	-0.03 (0.15)	0.35 (0.17)	-0.04	0.82781	-0.42	0.05128	-0.38	0.10242	0.16	0.1406		-0.15 (0.9)	-0.12 (0.7)	0.05 (0.68)	-0.12 (0.16)	-0.09 (0.09)	0.05 (0.1)	-0.03	0.86375	-0.18
804	F12	F12	P00748	310	EMIF-AD MBD	MRM	NA		0	0	2			0 (1)	0.16 (0.94)	-0.19 (0.92)	-0.06 (0.11)	0.16 (0.11)	-0.16 (0.08)	-0.22	0.15415	0.09	0.50681	0.31	0.01986	0.1 (0.79)	0.08 (1.12)	0.4 (0.99)	0.02 (0.16)	0.08 (0.19)	0.38 (0.22)	-0.06	0.79409	-0.36	0.18291	-0.3	0.30591	0.19	0.1644		-0.34 (1.31)	-0.15 (0.78)	-0.18 (0.91)	-0.31 (0.2)	-0.1 (0.11)	-0.2 (0.12)	-0.21	0.35482	-0.11
805	F13A1	F13A1	P00488	284	EMIF-AD MBD	MRM	NA		0	0	0			0 (1)	-0.03 (0.81)	-0.19 (0.85)	-0.03 (0.11)	-0.03 (0.1)	-0.17 (0.08)	0.01	0.9599	0.15	0.29406	0.14	0.27357	-0.01 (0.94)	-0.01 (0.71)	-0.12 (0.71)	-0.02 (0.15)	-0.01 (0.17)	-0.13 (0.21)	-0.01	0.95789	0.11	0.65716	0.13	0.64382	-0.06	0.6493		-0.26 (0.76)	-0.13 (0.76)	-0.22 (0.96)	-0.27 (0.2)	-0.11 (0.11)	-0.23 (0.11)	-0.16	0.4838	-0.04
806	F13B	F13B	P05160	310	EMIF-AD MBD	MRM	NA		0	0	2			0 (1)	0.11 (1.1)	-0.28 (0.91)	-0.02 (0.12)	0.11 (0.11)	-0.27 (0.08)	-0.13	0.41706	0.25	0.09374	0.38	0.00714	0.01 (1.31)	0.18 (0.85)	0.21 (0.93)	-0.01 (0.17)	0.18 (0.2)	0.2 (0.24)	-0.19	0.46275	-0.21	0.46135	-0.02	0.94449	0.1	0.5348		-0.51 (1.12)	-0.29 (0.67)	-0.19 (1.05)	-0.5 (0.21)	-0.27 (0.12)	-0.2 (0.13)	-0.23	0.34733	-0.31
807	F2	F2	P00734	249	ADNI	MRM	1	2	0	0	1			0 (0.99)	-0.21 (1.17)	0.04 (1.09)	-0.04 (0.15)	-0.29 (0.11)	0.02 (0.1)	0.25	0.17277	-0.05	0.76856	-0.31	0.03983	-0.36 (0.91)	-0.23 (1.25)	-0.01 (1.23)	-0.3 (0.24)	-0.36 (0.16)	-0.13 (0.23)	0.06	0.83657	-0.17	0.61622	-0.23	0.41986	0.13	0.4997		0.23 (1.15)	0.06 (0.93)	-0.04 (1.31)	-0.03 (0.31)	0.04 (0.13)	-0.01 (0.17)	-0.07	0.83381	-0.03
808	F2	F2	P00734	310	EMIF-AD MBD	MRM	NA	1	1	0	2	Increase		0 (1)	0.28 (0.86)	-0.14 (0.94)	-0.07 (0.11)	0.28 (0.11)	-0.11 (0.08)	-0.35	0.02138	0.04	0.79904	0.39	0.00372	0.04 (0.69)	0.38 (1.06)	0.63 (0.75)	-0.01 (0.15)	0.38 (0.18)	0.61 (0.22)	-0.38	0.10932	-0.62	0.02134	-0.23	0.41855	0.31	0.0135	Increase linear	-0.4 (1.15)	-0.12 (0.82)	-0.08 (0.99)	-0.39 (0.2)	-0.07 (0.11)	-0.1 (0.11)	-0.32	0.15633	-0.3
809	F3	F3	P13726	270	ADNI	RBM	0		-1	1	1	Decrease	Decrease	0 (1)	-0.27 (1)	0.85 (0.84)	-0.02 (0.12)	-0.33 (0.09)	0.83 (0.08)	0.31	0.04162	-0.85	0	-1.17	0	-0.08 (0.95)	-0.25 (1.01)	-0.5 (1)	-0.05 (0.18)	-0.35 (0.12)	-0.59 (0.18)	0.3	0.1701	0.54	0.03646	0.23	0.27462	-0.25	0.0713	Decrease non-linear	1.21 (0.55)	0.95 (0.89)	0.57 (0.77)	1 (0.25)	0.94 (0.1)	0.6 (0.13)	0.06	0.81244	0.4
811	F5	F5	P12259	310	EMIF-AD MBD	MRM	NA		1	0	2			0 (1)	0.26 (1.02)	-0.24 (0.92)	-0.12 (0.11)	0.24 (0.11)	-0.17 (0.08)	-0.37	0.01761	0.04	0.76042	0.41	0.0024	0.52 (1.17)	0.05 (0.75)	-0.01 (0.94)	0.38 (0.16)	0.06 (0.19)	-0.03 (0.22)	0.32	0.20037	0.41	0.13544	0.09	0.75107	-0.19	0.1651		-0.41 (1)	-0.27 (0.86)	-0.14 (0.97)	-0.34 (0.2)	-0.2 (0.11)	-0.17 (0.12)	-0.15	0.51891	-0.18
812	F9	F9	P00740	310	EMIF-AD MBD	MRM	NA		1	0	2			0 (1)	0.4 (0.9)	-0.17 (0.92)	-0.03 (0.11)	0.41 (0.11)	-0.15 (0.08)	-0.44	0.00389	0.12	0.38851	0.56	3e-05	0.18 (0.96)	0.51 (0.87)	0.71 (0.73)	0.18 (0.15)	0.51 (0.18)	0.69 (0.22)	-0.34	0.16009	-0.52	0.05178	-0.18	0.52372	0.24	0.0641		-0.51 (0.85)	-0.13 (0.87)	-0.09 (0.97)	-0.52 (0.2)	-0.11 (0.11)	-0.1 (0.11)	-0.41	0.0659	-0.43
814	FABP3	FABP3	P05413	249	ADNI	MRM	1	2	0	1	1			0.02 (0.83)	0.22 (0.85)	1.55 (0.75)	-0.01 (0.11)	0.17 (0.08)	1.54 (0.07)	-0.18	0.19955	-1.55	0	-1.37	0	-0.05 (0.85)	0.31 (0.88)	0.29 (0.75)	-0.02 (0.17)	0.24 (0.12)	0.23 (0.17)	-0.26	0.20238	-0.25	0.29074	0.01	0.95201	0.13	0.2985		1.38 (0.66)	1.55 (0.68)	1.62 (0.87)	1.21 (0.22)	1.54 (0.1)	1.64 (0.12)	-0.33	0.16725	-0.43
815	FABP3	FABP3	P05413	290	EMIF-AD MBD	MRM	NA	1	0	1	1		Increase	0 (1)	-0.13 (1.01)	1.29 (1.02)	0.14 (0.12)	-0.13 (0.12)	1.22 (0.09)	0.27	0.11305	-1.08	0	-1.35	0	-0.41 (0.95)	0.22 (0.94)	-0.02 (1.14)	-0.31 (0.18)	0.2 (0.21)	-0.02 (0.26)	-0.51	0.06367	-0.3	0.34912	0.22	0.52385	0.15	0.3387		0.72 (1.2)	1.37 (0.83)	1.38 (1.12)	0.7 (0.23)	1.31 (0.12)	1.39 (0.13)	-0.61	0.0207	-0.7
817	FABP5	FABP5	Q01469	293	EMIF-AD MBD	MRM	NA		0	0	0			0 (1)	0.04 (0.87)	-0.07 (1.08)	0.08 (0.12)	0.05 (0.12)	-0.11 (0.09)	0.03	0.84513	0.19	0.21683	0.16	0.27867	0.1 (1.16)	-0.01 (0.45)	0 (0.59)	0.16 (0.18)	-0.02 (0.22)	0.02 (0.25)	0.17	0.53936	0.14	0.65279	-0.04	0.91077	-0.09	0.492		-0.19 (1.03)	0.03 (1.01)	-0.14 (1.17)	-0.2 (0.23)	-0.01 (0.13)	-0.13 (0.13)	-0.18	0.47954	-0.07
818	FABP5P3	FABP5P3	A8MUU1	118	EMIF-AD MBD	MRM	NA		0	0	0			0 (1)	0.38 (0.83)	0.19 (1.09)	-0.02 (0.2)	0.37 (0.2)	0.2 (0.13)	-0.39	0.17075	-0.21	0.38937	0.18	0.46434	0.53 (1.1)	0.12 (0.46)	0.42 (0.59)	0.53 (0.31)	0.12 (0.37)	0.41 (0.43)	0.41	0.41075	0.12	0.82849	-0.29	0.61231	-0.09	0.6936		0.11 (1.05)	0.26 (1.41)	0.15 (0.75)	0.11 (0.32)	0.26 (0.22)	0.15 (0.2)	-0.15	0.69683	-0.04
820	FAH	FAH	P16930	146	EMIF-AD MBD	MRM	NA		0	0	0			0 (1)	-0.02 (1.39)	-0.09 (1.19)	0.02 (0.22)	-0.02 (0.2)	-0.1 (0.15)	0.04	0.90484	0.12	0.68003	0.08	0.74706	0.21 (1.57)	-0.17 (1.41)	-0.22 (0.96)	0.24 (0.34)	-0.16 (0.33)	-0.22 (0.53)	0.4	0.39759	0.46	0.47057	0.06	0.92579	-0.29	0.3728		-0.3 (0.74)	-0.01 (1.36)	-0.18 (0.94)	-0.33 (0.43)	-0.02 (0.2)	-0.18 (0.29)	-0.31	0.50781	-0.16
822	FAIM2	FAIM2	Q9BWQ8	310	EMIF-AD MBD	MRM	NA		-1	1	1	Decrease		0 (1)	-0.4 (0.87)	0.52 (0.79)	0.01 (0.1)	-0.41 (0.1)	0.51 (0.07)	0.42	0.00312	-0.5	0.00013	-0.92	0	-0.2 (0.76)	-0.37 (0.87)	-0.87 (0.94)	-0.21 (0.14)	-0.37 (0.16)	-0.86 (0.19)	0.16	0.45777	0.65	0.00646	0.49	0.05378	-0.3	0.0169	Decrease linear	0.69 (0.88)	0.6 (0.67)	0.36 (0.87)	0.71 (0.18)	0.6 (0.1)	0.36 (0.1)	0.11	0.59713	0.34
823	FAM171A1	FAM171A1	Q5VUB5	99	EMIF-AD MBD	MRM	NA		0	0	0		Decrease	0 (1)	-0.2 (1.13)	-0.07 (0.85)	0.08 (0.23)	-0.12 (0.19)	-0.13 (0.13)	0.2	0.51656	0.21	0.43885	0.02	0.94838	-0.44 (0.92)	0.17 (0.63)	-0.22 (1.71)	-0.3 (0.29)	0.17 (0.34)	-0.08 (0.35)	-0.46	0.30452	-0.21	0.63163	0.25	0.60907	0.12	0.6824		0.75 (1.57)	-0.1 (0.59)	-0.26 (0.7)	0.81 (0.34)	-0.2 (0.19)	-0.28 (0.17)	1.01	0.01209	1.08
825	FAM174A	FAM174A	Q8TBP5	173	EMIF-AD MBD	MRM	NA		-1	0	1	Decrease		0 (1)	-0.43 (0.82)	0.25 (0.82)	0.02 (0.14)	-0.44 (0.12)	0.25 (0.1)	0.46	0.01593	-0.23	0.19885	-0.69	2e-05	0.01 (0.54)	-0.69 (0.85)	-1.07 (0.79)	-0.02 (0.16)	-0.69 (0.19)	-1.07 (0.26)	0.67	0.00881	1.05	0.00069	0.38	0.23631	-0.56	0.0001	Decrease linear	0.23 (0.82)	0.43 (0.82)	0.08 (0.81)	0.29 (0.21)	0.41 (0.13)	0.09 (0.13)	-0.12	0.61475	0.2
828	FAM198B	FAM198B	Q6UWH4	310	EMIF-AD MBD	MRM	NA		-1	1	1	Decrease	Decrease	0 (1)	-0.25 (0.83)	0.36 (0.71)	0.06 (0.1)	-0.26 (0.09)	0.32 (0.07)	0.32	0.01797	-0.26	0.03199	-0.58	0	-0.04 (0.83)	-0.32 (0.82)	-0.62 (0.75)	-0.01 (0.13)	-0.32 (0.15)	-0.61 (0.18)	0.31	0.11295	0.6	0.00657	0.29	0.22349	-0.31	0.0107	Decrease linear	0.56 (0.64)	0.43 (0.67)	0.21 (0.75)	0.55 (0.16)	0.4 (0.09)	0.21 (0.09)	0.14	0.43622	0.33
830	FAM19A2	FAM19A2	Q8N3H0	189	EMIF-AD MBD	MRM	NA		-1	0	1			0 (1)	-0.49 (1.09)	0.23 (0.98)	0.11 (0.16)	-0.48 (0.14)	0.18 (0.1)	0.59	0.00567	-0.07	0.72762	-0.66	0.00022	-0.59 (0.82)	-0.1 (1.12)	-0.7 (1.39)	-0.51 (0.23)	-0.1 (0.28)	-0.71 (0.28)	-0.41	0.25927	0.2	0.58422	0.61	0.12249	-0.02	0.9249		0.31 (0.76)	0.33 (0.82)	0.12 (1.17)	0.29 (0.3)	0.27 (0.15)	0.15 (0.15)	0.02	0.9527	0.14
832	FAM19A5	FAM19A5	Q7Z5A7	310	EMIF-AD MBD	MRM	NA		-1	1	1	Decrease		0 (1)	-0.45 (0.9)	0.41 (0.77)	0 (0.1)	-0.46 (0.1)	0.41 (0.07)	0.46	0.00096	-0.41	0.0017	-0.87	0	-0.23 (0.88)	-0.58 (0.89)	-0.73 (0.89)	-0.26 (0.14)	-0.57 (0.16)	-0.73 (0.19)	0.31	0.14447	0.47	0.0501	0.15	0.54529	-0.26	0.0489	Decrease linear	0.45 (0.85)	0.48 (0.72)	0.32 (0.78)	0.47 (0.18)	0.48 (0.1)	0.32 (0.1)	-0.01	0.96739	0.16
835	FAM20C	FAM20C	Q8IXL6	310	EMIF-AD MBD	MRM	NA		-1	0	1			0 (1)	-0.37 (0.8)	0.11 (0.89)	0 (0.11)	-0.38 (0.1)	0.11 (0.08)	0.37	0.01127	-0.12	0.39264	-0.49	0.00016	-0.31 (0.9)	-0.48 (0.82)	-0.36 (0.52)	-0.34 (0.15)	-0.48 (0.18)	-0.36 (0.21)	0.14	0.54235	0.02	0.92628	-0.12	0.67008	-0.02	0.8714		0.15 (0.92)	0.12 (0.78)	0.09 (0.99)	0.17 (0.19)	0.13 (0.11)	0.08 (0.11)	0.04	0.86201	0.08
836	FAM234B	FAM234B	A2RU67	196	EMIF-AD MBD	MRM	NA		0	0	0			0 (1)	-0.02 (1.12)	-0.08 (0.87)	-0.04 (0.15)	-0.02 (0.14)	-0.06 (0.1)	-0.03	0.89911	0.01	0.948	0.04	0.82381	-0.14 (1.2)	0.22 (1.14)	-0.05 (0.96)	-0.2 (0.21)	0.22 (0.26)	-0.05 (0.29)	-0.42	0.20455	-0.15	0.6826	0.27	0.48242	0.04	0.8622		0.2 (0.97)	-0.21 (0.9)	-0.01 (0.81)	0.24 (0.28)	-0.18 (0.14)	-0.02 (0.15)	0.42	0.18162	0.26
839	FAM3C	FAM3C	Q92520	249	ADNI	MRM	1	2	-1	1	1	Decrease	Decrease	0 (0.89)	-0.76 (1.02)	0.43 (0.97)	-0.03 (0.13)	-0.8 (0.1)	0.43 (0.09)	0.77	1e-05	-0.46	0.00394	-1.23	0	-0.52 (1.03)	-0.72 (1.01)	-1.08 (1.03)	-0.5 (0.2)	-0.79 (0.14)	-1.13 (0.2)	0.29	0.24582	0.63	0.02916	0.34	0.16047	-0.32	0.0416	Decrease linear	1.01 (0.64)	0.6 (0.86)	0 (1.06)	0.81 (0.26)	0.62 (0.11)	0.02 (0.14)	0.2	0.49548	0.79
840	FAM3C	FAM3C	Q92520	310	EMIF-AD MBD	MRM	NA	1	-1	1	1	Decrease		0 (1)	-0.49 (0.85)	0.37 (0.81)	-0.01 (0.1)	-0.49 (0.1)	0.38 (0.07)	0.48	0.00068	-0.39	0.00315	-0.87	0	-0.24 (0.79)	-0.59 (0.85)	-0.86 (0.85)	-0.26 (0.14)	-0.59 (0.17)	-0.86 (0.2)	0.33	0.13251	0.6	0.01256	0.28	0.28238	-0.3	0.0162	Decrease linear	0.5 (0.79)	0.43 (0.78)	0.26 (0.84)	0.52 (0.18)	0.44 (0.1)	0.26 (0.1)	0.08	0.68491	0.26
841	FAM49B	FAM49B	Q9NUQ9	112	EMIF-AD MBD	MRM	NA		0	0	0			0 (1)	-0.15 (1.28)	0.06 (1.07)	-0.07 (0.22)	-0.16 (0.23)	0.1 (0.15)	0.09	0.7741	-0.17	0.54665	-0.26	0.34779	-0.11 (0.65)	0.3 (1.17)	-0.98 (2.59)	-0.12 (0.33)	0.27 (0.48)	-0.99 (0.58)	-0.39	0.50063	0.88	0.19515	1.26	0.09663	-0.38	0.3357		-0.28 (0.73)	0.1 (1.06)	0.1 (1.18)	-0.27 (0.47)	0.11 (0.21)	0.1 (0.24)	-0.38	0.4645	-0.37
842	FAM69C	FAM69C	Q0P6D2	298	EMIF-AD MBD	MRM	NA		-1	0	1			0 (1)	-0.55 (1.06)	0.22 (0.96)	-0.03 (0.12)	-0.55 (0.12)	0.23 (0.09)	0.52	0.00179	-0.27	0.08514	-0.79	0	-0.39 (1.02)	-0.68 (0.87)	-0.68 (1.38)	-0.43 (0.17)	-0.68 (0.21)	-0.69 (0.24)	0.25	0.36407	0.26	0.38379	0.01	0.97101	-0.18	0.2492		0.24 (1.26)	0.29 (0.88)	0.13 (0.94)	0.25 (0.23)	0.31 (0.13)	0.12 (0.13)	-0.05	0.83938	0.13
843	FAP	FAP	Q12884	307	EMIF-AD MBD	MRM	NA		0	0	1			0 (1)	0.01 (1.09)	0.57 (1.1)	0.21 (0.12)	0.03 (0.12)	0.45 (0.09)	0.18	0.29009	-0.25	0.11138	-0.43	0.00396	-0.13 (1.03)	0.09 (1.27)	0.22 (0.93)	0.04 (0.18)	0.08 (0.22)	0.26 (0.26)	-0.04	0.88023	-0.22	0.48559	-0.18	0.6004	0.08	0.5883		0.4 (1.22)	0.62 (0.95)	0.59 (1.22)	0.32 (0.23)	0.51 (0.13)	0.62 (0.14)	-0.19	0.47991	-0.3
844	FASLG	FASLG	P48023	270	ADNI	RBM	0		0	0	0			0 (1)	0.09 (1.54)	0.34 (1.23)	-0.01 (0.18)	0.02 (0.14)	0.32 (0.12)	-0.03	0.89257	-0.33	0.12447	-0.3	0.09516	-0.02 (1.19)	0.18 (1.88)	-0.03 (0.93)	0.02 (0.29)	0.07 (0.2)	-0.14 (0.29)	-0.05	0.89556	0.16	0.70135	0.2	0.55275	-0.07	0.7784		0.53 (1.45)	0.46 (1.29)	0.08 (1.04)	0.35 (0.4)	0.43 (0.16)	0.11 (0.21)	-0.08	0.85811	0.24
846	FAT2	FAT2	Q9NYQ8	310	EMIF-AD MBD	MRM	NA		-1	0	1			0 (1)	-0.44 (1.13)	0.12 (0.86)	-0.1 (0.11)	-0.44 (0.11)	0.18 (0.08)	0.34	0.03026	-0.28	0.05597	-0.62	1e-05	-0.23 (1.12)	-0.55 (0.92)	-0.7 (1.4)	-0.35 (0.16)	-0.55 (0.19)	-0.73 (0.23)	0.19	0.44304	0.38	0.17835	0.18	0.5405	-0.2	0.2165		0.16 (0.9)	0.19 (0.83)	0.03 (0.89)	0.21 (0.21)	0.27 (0.12)	0 (0.12)	-0.06	0.81186	0.21
848	FBLN1	FBLN1	P23142	249	ADNI	MRM	1	2	-1	1	1			0 (0.86)	-0.5 (0.95)	0.33 (0.93)	-0.04 (0.12)	-0.55 (0.09)	0.33 (0.08)	0.52	0.00066	-0.36	0.01084	-0.88	0	-0.56 (0.84)	-0.44 (1.04)	-0.57 (0.87)	-0.54 (0.19)	-0.51 (0.13)	-0.63 (0.18)	-0.03	0.90939	0.09	0.74056	0.11	0.61009	-0.04	0.7768		0.64 (0.85)	0.44 (0.8)	0.06 (1.08)	0.4 (0.25)	0.47 (0.11)	0.09 (0.13)	-0.06	0.81112	0.31
849	FBLN1	FBLN1	P23142	310	EMIF-AD MBD	MRM	NA	1	0	0	0			0 (1)	0.04 (0.88)	0.2 (0.76)	-0.03 (0.1)	0.03 (0.1)	0.22 (0.07)	-0.06	0.66968	-0.24	0.05675	-0.18	0.12701	0.17 (1.05)	-0.05 (0.75)	-0.11 (0.61)	0.12 (0.14)	-0.04 (0.16)	-0.12 (0.19)	0.16	0.44682	0.23	0.32067	0.07	0.77401	-0.09	0.4533		0.17 (0.87)	0.18 (0.73)	0.23 (0.77)	0.2 (0.17)	0.2 (0.1)	0.22 (0.1)	0	0.99834	-0.02
850	FBLN2	FBLN2	P98095	310	EMIF-AD MBD	MRM	NA		0	0	0	Decrease		0 (1)	0.01 (1)	0.17 (0.84)	-0.03 (0.11)	0 (0.1)	0.2 (0.08)	-0.03	0.82862	-0.23	0.0953	-0.2	0.12982	0.26 (1.1)	-0.1 (0.91)	-0.38 (0.79)	0.22 (0.15)	-0.1 (0.18)	-0.38 (0.21)	0.31	0.18143	0.59	0.02326	0.28	0.31652	-0.29	0.0486	Decrease linear	0.46 (0.96)	0.15 (0.68)	0.1 (0.94)	0.49 (0.19)	0.17 (0.11)	0.1 (0.11)	0.33	0.13874	0.4
851	FBLN5	FBLN5	Q9UBX5	310	EMIF-AD MBD	MRM	NA		0	1	1			0 (1)	-0.09 (1.07)	0.44 (0.99)	0.07 (0.12)	-0.1 (0.12)	0.41 (0.09)	0.16	0.32922	-0.34	0.02492	-0.5	0.00053	0.06 (1.19)	-0.18 (1.05)	-0.29 (0.79)	0.09 (0.17)	-0.19 (0.21)	-0.27 (0.25)	0.28	0.30912	0.37	0.22835	0.09	0.78783	-0.17	0.2827		0.58 (0.98)	0.47 (0.88)	0.37 (1.12)	0.57 (0.22)	0.44 (0.13)	0.38 (0.13)	0.13	0.60628	0.19
852	FBLN7	FBLN7	Q53RD9	296	EMIF-AD MBD	MRM	NA		-1	1	1	Decrease		0 (1)	-0.45 (0.73)	0.48 (0.8)	0 (0.1)	-0.46 (0.1)	0.48 (0.07)	0.46	0.00118	-0.48	0.00024	-0.94	0	-0.31 (0.66)	-0.44 (0.7)	-0.75 (0.86)	-0.34 (0.14)	-0.44 (0.16)	-0.75 (0.19)	0.1	0.63462	0.41	0.08802	0.31	0.21764	-0.22	0.0461	Decrease linear	0.71 (0.92)	0.5 (0.8)	0.38 (0.76)	0.72 (0.17)	0.51 (0.1)	0.38 (0.1)	0.21	0.29545	0.34
853	FBN1	FBN1	P35555	310	EMIF-AD MBD	MRM	NA		0	0	0			0 (1)	0.01 (0.95)	-0.1 (0.87)	-0.07 (0.11)	0 (0.11)	-0.06 (0.08)	-0.07	0.63963	-0.01	0.9681	0.07	0.62057	0.03 (1.08)	0.03 (0.98)	-0.07 (0.61)	-0.04 (0.15)	0.04 (0.18)	-0.09 (0.22)	-0.07	0.75589	0.05	0.86231	0.12	0.67227	-0.01	0.9337		-0.26 (0.87)	-0.05 (0.86)	-0.1 (0.9)	-0.23 (0.2)	-0.01 (0.11)	-0.12 (0.11)	-0.22	0.32746	-0.12
856	FCGBP	FCGBP	Q9Y6R7	310	EMIF-AD MBD	MRM	NA		0	0	0			0 (1)	0 (0.8)	-0.01 (0.79)	-0.01 (0.1)	0 (0.1)	-0.01 (0.07)	-0.02	0.90723	-0.01	0.96148	0.01	0.93409	-0.04 (0.76)	-0.04 (0.84)	0.12 (0.87)	-0.01 (0.14)	-0.04 (0.16)	0.12 (0.19)	0.03	0.90278	-0.13	0.58826	-0.15	0.54357	0.07	0.5341		-0.07 (0.73)	-0.07 (0.81)	0.06 (0.8)	-0.09 (0.17)	-0.07 (0.1)	0.06 (0.1)	-0.02	0.92606	-0.15
857	FCGR2A	FCGR2A	P12318	284	EMIF-AD MBD	MRM	NA		0	0	0			0 (1)	0.18 (1.04)	0.19 (0.97)	0.05 (0.12)	0.18 (0.12)	0.17 (0.09)	-0.13	0.44253	-0.12	0.43173	0.01	0.95129	0.32 (0.88)	0.02 (1.18)	0.11 (1.15)	0.35 (0.18)	0.01 (0.21)	0.11 (0.26)	0.34	0.22588	0.24	0.44121	-0.1	0.77009	-0.15	0.3507		0.33 (0.68)	0.11 (1.11)	0.23 (0.89)	0.32 (0.22)	0.1 (0.13)	0.24 (0.13)	0.22	0.39196	0.08
858	FCGR2C	FCGR2C	P31995	284	EMIF-AD MBD	MRM	NA		0	0	0			0 (1)	0.18 (1.04)	0.19 (0.96)	0.05 (0.12)	0.18 (0.12)	0.17 (0.09)	-0.13	0.43797	-0.12	0.43123	0.01	0.9449	0.32 (0.88)	0.02 (1.18)	0.11 (1.14)	0.35 (0.18)	0.01 (0.21)	0.11 (0.26)	0.34	0.22203	0.24	0.44422	-0.1	0.75995	-0.15	0.3521		0.33 (0.68)	0.11 (1.1)	0.23 (0.89)	0.31 (0.22)	0.1 (0.13)	0.24 (0.13)	0.21	0.40438	0.07
859	FCGR3A	FCGR3A	P08637	283	EMIF-AD MBD	MRM	NA		0	0	0			0 (1)	0.2 (0.84)	0.44 (1.24)	0.08 (0.14)	0.21 (0.13)	0.4 (0.09)	-0.12	0.51717	-0.31	0.07143	-0.19	0.2468	0.24 (0.93)	0.04 (0.72)	0.35 (0.79)	0.32 (0.2)	0.05 (0.24)	0.37 (0.3)	0.28	0.37654	-0.05	0.88771	-0.33	0.39031	-0.06	0.6499		0.7 (0.51)	0.22 (1.65)	0.6 (0.75)	0.68 (0.26)	0.16 (0.14)	0.62 (0.14)	0.52	0.07289	0.06
860	FCGR3B	FCGR3B	O75015	237	EMIF-AD MBD	MRM	NA		0	0	0			0 (1)	0.15 (0.4)	0.19 (1.18)	0.02 (0.15)	0.15 (0.13)	0.18 (0.09)	-0.13	0.51527	-0.15	0.39988	-0.02	0.882	0.13 (0.44)	0.1 (0.35)	0.27 (0.4)	0.16 (0.2)	0.11 (0.24)	0.26 (0.29)	0.05	0.8748	-0.1	0.76926	-0.15	0.6841	0.01	0.8797		0.45 (0.25)	-0.06 (1.63)	0.42 (0.32)	0.45 (0.25)	-0.08 (0.13)	0.42 (0.14)	0.53	0.05993	0.03
864	FCN3	FCN3	O75636	206	EMIF-AD MBD	MRM	NA		0	-1	2			0 (1)	0.03 (1.03)	-0.38 (0.8)	0.02 (0.13)	0.03 (0.13)	-0.39 (0.1)	-0.01	0.95004	0.41	0.01429	0.43	0.01011	-0.25 (1.3)	0.39 (0.65)	0.03 (0.4)	-0.21 (0.18)	0.39 (0.2)	0.05 (0.34)	-0.6	0.02766	-0.27	0.48563	0.34	0.39284	0.23	0.269		-0.3 (0.83)	-0.5 (0.68)	-0.29 (0.9)	-0.32 (0.23)	-0.52 (0.15)	-0.29 (0.14)	0.2	0.46508	-0.04
866	FETUB	FETUB	Q9UGM5	310	EMIF-AD MBD	MRM	NA		0	0	2	Increase		0 (1)	0.08 (1.29)	-0.32 (1.09)	-0.12 (0.13)	0.08 (0.13)	-0.26 (0.09)	-0.2	0.27526	0.14	0.40243	0.34	0.03315	-0.34 (1.27)	0.52 (1.22)	0.37 (1.23)	-0.48 (0.19)	0.53 (0.23)	0.33 (0.27)	-1	0.00094	-0.81	0.01521	0.19	0.59181	0.47	0.0136	Increase linear	-0.38 (1.23)	-0.4 (0.97)	-0.22 (1.16)	-0.31 (0.25)	-0.31 (0.14)	-0.25 (0.14)	0	0.98623	-0.06
867	FGA	FGA	P02671	270	ADNI	RBM	0	2	0	1	1			0 (1)	0.2 (1.14)	0.54 (0.93)	-0.02 (0.13)	0.12 (0.1)	0.52 (0.09)	-0.14	0.41586	-0.54	0.00093	-0.4	0.00312	0.17 (0.89)	0.09 (1.28)	0.46 (1.03)	0.21 (0.21)	-0.03 (0.14)	0.35 (0.21)	0.23	0.36113	-0.15	0.62064	-0.38	0.12581	0.08	0.6374		0.59 (1.24)	0.59 (0.84)	0.45 (1)	0.38 (0.29)	0.57 (0.12)	0.48 (0.15)	-0.19	0.54703	-0.1
868	FGA	FGA	P02671	310	EMIF-AD MBD	MRM	NA	1	0	0	0			0 (1)	0.1 (0.9)	-0.02 (0.8)	0.04 (0.1)	0.11 (0.1)	-0.05 (0.07)	-0.07	0.63149	0.09	0.49294	0.16	0.2029	-0.04 (0.87)	0.14 (1.02)	0.33 (0.74)	0.01 (0.14)	0.14 (0.17)	0.34 (0.2)	-0.13	0.55594	-0.33	0.18166	-0.2	0.45186	0.15	0.2436		-0.01 (0.94)	-0.09 (0.74)	0.04 (0.82)	-0.04 (0.18)	-0.11 (0.1)	0.05 (0.11)	0.07	0.74068	-0.08
869	FGB	FGB	P02675	310	EMIF-AD MBD	MRM	NA		0	0	0			0 (1)	0.07 (0.91)	-0.03 (0.8)	0.01 (0.1)	0.08 (0.1)	-0.04 (0.07)	-0.06	0.65779	0.06	0.66475	0.12	0.33429	-0.06 (0.88)	0.07 (1.05)	0.34 (0.73)	-0.03 (0.14)	0.06 (0.17)	0.34 (0.2)	-0.1	0.66582	-0.37	0.13165	-0.28	0.29599	0.17	0.2142		-0.06 (0.98)	-0.08 (0.78)	0.03 (0.77)	-0.08 (0.18)	-0.09 (0.1)	0.03 (0.11)	0	0.98184	-0.12
871	FGF4	FGF4	P08620	270	ADNI	RBM	0		1	1	2			0 (1)	0.86 (0.8)	0.52 (0.92)	0.02 (0.12)	0.91 (0.09)	0.52 (0.08)	-0.89	0	-0.5	0.00042	0.38	0.00132	0.68 (0.88)	0.88 (0.78)	0.98 (0.75)	0.66 (0.18)	0.97 (0.12)	1.05 (0.17)	-0.31	0.14769	-0.4	0.11263	-0.08	0.68635	0.16	0.1717		0.27 (1.03)	0.51 (0.89)	0.59 (0.96)	0.46 (0.24)	0.52 (0.1)	0.56 (0.13)	-0.06	0.82855	-0.1
872	FGFR1	FGFR1	P11362	310	EMIF-AD MBD	MRM	NA		-1	0	1	Decrease		0 (1)	-0.44 (0.99)	0.18 (0.69)	-0.02 (0.1)	-0.44 (0.1)	0.2 (0.07)	0.42	0.00278	-0.22	0.08353	-0.64	0	-0.18 (0.98)	-0.54 (0.87)	-0.83 (1.03)	-0.22 (0.13)	-0.54 (0.16)	-0.84 (0.19)	0.32	0.12362	0.62	0.00807	0.3	0.23394	-0.32	0.0276	Decrease linear	0.26 (0.75)	0.26 (0.62)	0.08 (0.73)	0.28 (0.17)	0.28 (0.1)	0.07 (0.1)	0	0.99936	0.21
873	FGFR2	FGFR2	P21802	310	EMIF-AD MBD	MRM	NA		-1	1	1		Decrease	0 (1)	-0.36 (0.94)	0.23 (0.92)	-0.03 (0.11)	-0.36 (0.11)	0.25 (0.08)	0.34	0.02834	-0.28	0.04744	-0.62	1e-05	-0.18 (0.92)	-0.48 (0.73)	-0.57 (1.22)	-0.24 (0.16)	-0.47 (0.19)	-0.57 (0.22)	0.23	0.34087	0.34	0.21654	0.1	0.72423	-0.19	0.1708		0.53 (1.12)	0.24 (0.8)	0.12 (0.95)	0.57 (0.2)	0.27 (0.11)	0.11 (0.12)	0.29	0.20253	0.45
874	FGFR3	FGFR3	P22607	310	EMIF-AD MBD	MRM	NA		-1	0	1			0 (1)	-0.48 (0.82)	0.26 (0.83)	0.05 (0.1)	-0.48 (0.1)	0.23 (0.07)	0.53	0.00018	-0.18	0.16764	-0.71	0	-0.33 (0.65)	-0.58 (0.88)	-0.65 (1.03)	-0.32 (0.14)	-0.58 (0.17)	-0.64 (0.2)	0.26	0.24279	0.32	0.19027	0.06	0.81011	-0.18	0.1463		0.44 (1.03)	0.25 (0.74)	0.21 (0.85)	0.44 (0.18)	0.24 (0.1)	0.21 (0.1)	0.2	0.32323	0.23
876	FGG	FGG	P02679	310	EMIF-AD MBD	MRM	NA		0	0	0			0 (1)	0.06 (0.95)	-0.01 (0.83)	0.02 (0.1)	0.07 (0.1)	-0.02 (0.08)	-0.05	0.72603	0.04	0.78974	0.09	0.49425	-0.03 (0.93)	-0.04 (1.09)	0.38 (0.73)	0 (0.15)	-0.05 (0.18)	0.38 (0.21)	0.05	0.82601	-0.38	0.14609	-0.43	0.12373	0.15	0.2726		0.01 (0.97)	-0.06 (0.82)	0.05 (0.81)	-0.02 (0.19)	-0.07 (0.11)	0.05 (0.11)	0.05	0.80411	-0.07
877	FGL2	FGL2	Q14314	310	EMIF-AD MBD	MRM	NA		0	0	1			0 (1)	-0.11 (1)	0.1 (0.92)	-0.09 (0.11)	-0.12 (0.11)	0.15 (0.08)	0.03	0.84153	-0.24	0.09755	-0.27	0.04802	-0.02 (1.15)	-0.34 (0.93)	0.01 (0.69)	-0.1 (0.16)	-0.34 (0.19)	-0.01 (0.23)	0.24	0.33645	-0.09	0.75574	-0.33	0.27241	0.01	0.9425		-0.08 (1.25)	0.16 (0.83)	0.09 (0.88)	-0.05 (0.21)	0.21 (0.12)	0.08 (0.12)	-0.26	0.27555	-0.12
881	FITM1	FITM1	A5D6W6	285	EMIF-AD MBD	MRM	NA		0	0	1			0 (1)	-0.25 (0.95)	0.15 (0.79)	-0.04 (0.11)	-0.26 (0.11)	0.18 (0.08)	0.21	0.16148	-0.22	0.11177	-0.43	0.00106	-0.1 (0.93)	-0.57 (0.9)	-0.15 (1)	-0.17 (0.15)	-0.55 (0.18)	-0.15 (0.2)	0.38	0.11106	-0.02	0.95263	-0.4	0.14845	-0.04	0.791		0.16 (0.99)	0.13 (0.77)	0.17 (0.75)	0.2 (0.19)	0.16 (0.11)	0.16 (0.11)	0.04	0.85507	0.04
883	FKBP1A	FKBP1A	P62942	268	EMIF-AD MBD	MRM	NA		0	1	1			0 (1)	-0.02 (0.62)	0.65 (1.04)	0.05 (0.12)	-0.01 (0.11)	0.62 (0.08)	0.07	0.68616	-0.56	0.00021	-0.63	1e-05	0.04 (0.63)	-0.18 (0.73)	0.11 (0.41)	0.08 (0.17)	-0.19 (0.2)	0.14 (0.24)	0.27	0.30388	-0.06	0.83727	-0.33	0.29078	0	0.9709		0.55 (1.44)	0.64 (0.93)	0.69 (1.03)	0.54 (0.22)	0.6 (0.12)	0.7 (0.13)	-0.06	0.8213	-0.16
884	FKBP2	FKBP2	P26885	133	EMIF-AD MBD	MRM	NA		0	0	0			0 (1)	-0.07 (1.36)	0.06 (1.09)	-0.06 (0.23)	-0.05 (0.21)	0.08 (0.14)	-0.02	0.96052	-0.14	0.62429	-0.12	0.62268	-0.42 (1.26)	0.26 (1.64)	0.25 (0.45)	-0.46 (0.3)	0.29 (0.33)	0.33 (0.58)	-0.75	0.10081	-0.79	0.23305	-0.04	0.95205	0.57	0.1254		-0.74 (1.32)	0.26 (0.85)	0.14 (1.14)	-0.7 (0.35)	0.26 (0.2)	0.12 (0.21)	-0.96	0.02238	-0.82
888	FLNA	FLNA	P21333	253	EMIF-AD MBD	MRM	NA		0	0	0			0 (1)	-0.03 (0.63)	0.02 (0.74)	0.14 (0.1)	-0.03 (0.1)	-0.05 (0.07)	0.17	0.24499	0.19	0.13965	0.03	0.8356	-0.02 (0.73)	0.03 (0.56)	-0.14 (0.52)	0.07 (0.14)	0.03 (0.15)	-0.11 (0.19)	0.04	0.86011	0.18	0.44186	0.14	0.5595	-0.1	0.351		-0.27 (0.75)	0.12 (0.74)	0 (0.73)	-0.29 (0.16)	0.07 (0.09)	0.02 (0.1)	-0.36	0.05541	-0.31
891	FMOD	FMOD	Q06828	249	ADNI	MRM	0	2	0	0	0			0 (1)	-0.18 (0.79)	-0.01 (0.73)	-0.02 (0.11)	-0.21 (0.09)	-0.02 (0.07)	0.19	0.18022	0	0.99362	-0.19	0.09471	-0.23 (0.58)	-0.21 (0.97)	-0.06 (0.51)	-0.21 (0.17)	-0.26 (0.12)	-0.11 (0.16)	0.04	0.82769	-0.1	0.65786	-0.15	0.45373	0.08	0.51		0.2 (0.67)	-0.06 (0.67)	0.01 (0.83)	0.1 (0.22)	-0.07 (0.09)	0.02 (0.12)	0.17	0.47858	0.08
892	FMOD	FMOD	Q06828	310	EMIF-AD MBD	MRM	NA	1	1	0	0			0 (1)	0.28 (0.92)	0.02 (0.84)	-0.11 (0.1)	0.28 (0.1)	0.08 (0.08)	-0.39	0.00805	-0.19	0.15379	0.2	0.12202	0.31 (1.11)	0.28 (0.85)	0.24 (0.54)	0.24 (0.15)	0.28 (0.18)	0.21 (0.21)	-0.04	0.85058	0.03	0.91133	0.07	0.79317	0	0.998		-0.1 (0.82)	0.02 (0.84)	0.07 (0.86)	-0.08 (0.19)	0.07 (0.11)	0.05 (0.11)	-0.15	0.4729	-0.14
893	FN1	FN1	P02751	310	EMIF-AD MBD	MRM	NA		-1	0	1	Decrease		0 (1)	-0.24 (0.75)	0.35 (0.82)	0.12 (0.1)	-0.24 (0.1)	0.28 (0.07)	0.36	0.00979	-0.17	0.18307	-0.53	2e-05	-0.19 (0.62)	-0.06 (0.65)	-0.63 (1.01)	-0.1 (0.13)	-0.06 (0.16)	-0.6 (0.19)	-0.03	0.86941	0.5	0.02992	0.54	0.0306	-0.23	0.0319	Decrease linear	0.43 (0.75)	0.41 (0.79)	0.25 (0.89)	0.39 (0.17)	0.35 (0.1)	0.27 (0.1)	0.04	0.82696	0.12
895	FOLR1	FOLR1	P15328	302	EMIF-AD MBD	MRM	NA		1	0	2			0 (1)	0.36 (1.14)	-0.19 (0.99)	-0.14 (0.12)	0.35 (0.12)	-0.11 (0.09)	-0.49	0.00339	-0.03	0.85757	0.46	0.00154	0.56 (1.28)	0.24 (0.93)	0.12 (1.11)	0.45 (0.18)	0.24 (0.21)	0.09 (0.26)	0.21	0.4582	0.36	0.24303	0.16	0.63797	-0.15	0.3405		-0.25 (1.08)	-0.23 (0.91)	-0.12 (1.04)	-0.19 (0.22)	-0.16 (0.13)	-0.15 (0.13)	-0.04	0.88686	-0.04
896	FOLR2	FOLR2	P14207	310	EMIF-AD MBD	MRM	NA		-1	0	1			0 (1)	-0.37 (0.79)	0.38 (0.87)	0.11 (0.1)	-0.37 (0.1)	0.32 (0.07)	0.48	0.00074	-0.21	0.10744	-0.69	0	-0.33 (0.8)	-0.33 (0.77)	-0.53 (0.83)	-0.26 (0.14)	-0.33 (0.17)	-0.5 (0.2)	0.07	0.73786	0.25	0.32014	0.17	0.51801	-0.11	0.3478		0.61 (0.83)	0.41 (0.89)	0.27 (0.84)	0.59 (0.18)	0.36 (0.1)	0.29 (0.11)	0.23	0.26564	0.3
897	FOLR3	FOLR3	P41439	197	EMIF-AD MBD	MRM	NA		0	0	0			0 (1)	-0.2 (1.42)	0.21 (0.99)	0.13 (0.16)	-0.19 (0.16)	0.14 (0.11)	0.32	0.17177	-0.01	0.95587	-0.33	0.10179	-0.38 (1.02)	0.52 (1.78)	-0.98 (1.08)	-0.31 (0.25)	0.53 (0.29)	-0.97 (0.37)	-0.84	0.02723	0.66	0.1346	1.5	0.00154	-0.18	0.5321		0.18 (1.17)	0.39 (1.05)	0.04 (0.86)	0.14 (0.3)	0.35 (0.17)	0.05 (0.16)	-0.2	0.54967	0.09
901	FRMPD1	FRMPD1	Q5SYB0	310	EMIF-AD MBD	MRM	NA		0	0	0			0 (1)	0.1 (1.01)	0.15 (0.87)	-0.04 (0.11)	0.09 (0.11)	0.18 (0.08)	-0.13	0.38174	-0.22	0.11624	-0.09	0.51055	0.17 (1.1)	0.13 (0.58)	-0.09 (1.29)	0.1 (0.16)	0.13 (0.19)	-0.1 (0.22)	-0.04	0.88419	0.2	0.46031	0.24	0.41749	-0.04	0.7809		0.04 (1.28)	0.16 (0.73)	0.18 (0.86)	0.07 (0.2)	0.2 (0.11)	0.16 (0.12)	-0.13	0.58378	-0.09
902	FRRS1L	FRRS1L	Q9P0K9	245	EMIF-AD MBD	MRM	NA		-1	0	1	Decrease		0 (1)	-0.67 (0.96)	0.16 (0.86)	0.04 (0.12)	-0.68 (0.12)	0.14 (0.09)	0.72	3e-05	-0.1	0.53186	-0.82	0	-0.35 (0.73)	-0.73 (0.87)	-1.27 (1.2)	-0.33 (0.17)	-0.74 (0.21)	-1.25 (0.23)	0.4	0.1345	0.91	0.00158	0.51	0.10669	-0.44	0.0041	Decrease linear	0.23 (0.84)	0.24 (0.84)	0.03 (0.89)	0.24 (0.21)	0.22 (0.12)	0.04 (0.13)	0.02	0.93371	0.2
903	FRZB	FRZB	Q92765	310	EMIF-AD MBD	MRM	NA		0	1	1			0 (1)	-0.03 (1.09)	0.44 (0.88)	-0.05 (0.11)	-0.03 (0.11)	0.47 (0.08)	-0.01	0.93994	-0.51	0.00047	-0.5	0.00031	0.11 (1.06)	-0.45 (1.12)	0.29 (1)	0.08 (0.16)	-0.45 (0.19)	0.29 (0.23)	0.53	0.0373	-0.21	0.4632	-0.74	0.0152	0.06	0.7194		0.15 (0.73)	0.44 (0.93)	0.53 (0.87)	0.16 (0.21)	0.46 (0.12)	0.53 (0.12)	-0.3	0.21043	-0.37
904	FSCN1	FSCN1	Q16658	246	EMIF-AD MBD	MRM	NA		0	0	1			0 (1)	-0.37 (1.19)	0.19 (1.08)	-0.08 (0.13)	-0.38 (0.15)	0.24 (0.1)	0.3	0.13407	-0.32	0.0709	-0.62	0.00067	0 (1.29)	-0.75 (1.25)	-0.48 (0.58)	-0.09 (0.23)	-0.76 (0.25)	-0.51 (0.32)	0.66	0.05648	0.42	0.29158	-0.24	0.54758	-0.29	0.1803		0.17 (1.01)	0.19 (1.02)	0.19 (1.16)	0.19 (0.28)	0.25 (0.16)	0.17 (0.15)	-0.07	0.83313	0.01
905	FSHB	FSHB	P01225	270	ADNI	RBM	0		0	0	0			0 (1)	-0.21 (1.05)	0.1 (1.04)	0 (0.12)	-0.05 (0.1)	0.17 (0.08)	0.05	0.76161	-0.17	0.26857	-0.21	0.08867	-0.27 (1.11)	-0.2 (1.06)	-0.17 (1.03)	-0.38 (0.2)	0.06 (0.13)	0.1 (0.19)	-0.44	0.06923	-0.48	0.08331	-0.05	0.84575	0.24	0.0904		0.12 (1.32)	0.09 (0.99)	0.11 (1.06)	0.33 (0.27)	0.21 (0.11)	0.06 (0.14)	0.12	0.6673	0.27
906	FSTL1	FSTL1	Q12841	310	EMIF-AD MBD	MRM	NA		0	0	0			0 (1)	0.1 (0.93)	0.02 (0.84)	-0.1 (0.1)	0.08 (0.1)	0.08 (0.07)	-0.19	0.19649	-0.18	0.17858	0.01	0.95122	0.24 (1.05)	-0.01 (0.83)	-0.07 (0.77)	0.15 (0.15)	0 (0.17)	-0.09 (0.21)	0.15	0.50958	0.23	0.35916	0.08	0.76327	-0.11	0.4252		-0.15 (0.85)	0.04 (0.76)	0.05 (0.92)	-0.1 (0.19)	0.09 (0.11)	0.03 (0.11)	-0.19	0.36538	-0.13
907	FSTL3	FSTL3	O95633	226	EMIF-AD MBD	MRM	NA		0	0	0			0 (1)	0.09 (1.13)	0.21 (1)	0.06 (0.14)	0.1 (0.14)	0.17 (0.1)	-0.04	0.84242	-0.12	0.51165	-0.08	0.63871	0 (1.09)	0.19 (1.06)	0.12 (1.41)	0.04 (0.21)	0.2 (0.24)	0.12 (0.32)	-0.16	0.61763	-0.08	0.83525	0.08	0.83988	0.1	0.6279		0.06 (1.28)	0.25 (0.87)	0.2 (1.07)	0.05 (0.27)	0.22 (0.14)	0.21 (0.16)	-0.18	0.5621	-0.17
908	FSTL4	FSTL4	Q6MZW2	310	EMIF-AD MBD	MRM	NA		0	1	1			0 (1)	-0.32 (0.96)	0.18 (0.84)	-0.11 (0.1)	-0.33 (0.1)	0.24 (0.07)	0.23	0.11468	-0.35	0.00865	-0.58	1e-05	-0.06 (0.86)	-0.5 (0.89)	-0.61 (1.14)	-0.18 (0.15)	-0.49 (0.17)	-0.63 (0.21)	0.32	0.1636	0.45	0.07268	0.14	0.61284	-0.26	0.06		0.29 (1.01)	0.19 (0.84)	0.13 (0.78)	0.35 (0.19)	0.25 (0.11)	0.11 (0.11)	0.1	0.6547	0.24
909	FSTL5	FSTL5	Q8N475	310	EMIF-AD MBD	MRM	NA		0	1	1	Decrease		0 (1)	-0.34 (0.97)	0.08 (0.88)	-0.13 (0.11)	-0.35 (0.1)	0.16 (0.08)	0.22	0.14001	-0.28	0.04015	-0.5	0.00013	-0.07 (0.86)	-0.49 (0.9)	-0.67 (1.16)	-0.19 (0.15)	-0.49 (0.18)	-0.69 (0.21)	0.3	0.20562	0.51	0.05483	0.21	0.46432	-0.29	0.0368	Decrease linear	0.21 (0.97)	0.03 (0.87)	0.09 (0.86)	0.26 (0.19)	0.1 (0.11)	0.06 (0.11)	0.16	0.48297	0.2
910	FTH1	FTH1	P02794	182	EMIF-AD MBD	MRM	NA		0	0	1	Decrease		0 (1)	-0.14 (0.81)	0.23 (0.8)	-0.05 (0.14)	-0.13 (0.12)	0.25 (0.09)	0.08	0.65058	-0.3	0.08099	-0.38	0.01117	0.14 (0.67)	-0.21 (0.89)	-0.51 (0.79)	0.08 (0.17)	-0.17 (0.19)	-0.52 (0.22)	0.25	0.33234	0.6	0.03136	0.35	0.22402	-0.32	0.0245	Decrease linear	-0.06 (0.73)	0.37 (0.74)	0.17 (0.87)	-0.09 (0.24)	0.42 (0.13)	0.15 (0.13)	-0.51	0.06029	-0.23
911	FTL	FTL	P02792	270	ADNI	RBM	0		0	1	1			0 (1)	-0.02 (1.25)	0.55 (1.19)	-0.02 (0.16)	-0.09 (0.12)	0.54 (0.1)	0.07	0.73536	-0.56	0.00366	-0.62	0.00011	-0.17 (1.27)	-0.04 (1.31)	0.15 (1.14)	-0.14 (0.25)	-0.14 (0.17)	0.06 (0.25)	0.01	0.98474	-0.19	0.58799	-0.2	0.50472	0.1	0.5872		0.45 (0.71)	0.67 (1.18)	0.39 (1.32)	0.24 (0.35)	0.65 (0.14)	0.42 (0.18)	-0.41	0.27264	-0.18
913	FUCA1	FUCA1	P04066	310	EMIF-AD MBD	MRM	NA		0	0	1		Decrease	0 (1)	-0.18 (1.03)	0.07 (1.07)	-0.05 (0.12)	-0.19 (0.12)	0.1 (0.09)	0.14	0.40749	-0.15	0.33443	-0.29	0.0494	-0.17 (1.13)	-0.15 (0.89)	-0.24 (1.06)	-0.27 (0.18)	-0.14 (0.21)	-0.27 (0.25)	-0.13	0.64299	-0.01	0.98565	0.12	0.7092	0.01	0.9717		0.65 (0.66)	-0.03 (1.08)	-0.01 (1.12)	0.69 (0.23)	0.03 (0.13)	-0.03 (0.13)	0.65	0.01245	0.72
914	FUCA2	FUCA2	Q9BTY2	303	EMIF-AD MBD	MRM	NA		0	0	0		Decrease	0 (1)	-0.12 (1.05)	-0.01 (1.1)	-0.03 (0.13)	-0.12 (0.12)	0.01 (0.09)	0.09	0.61246	-0.04	0.82489	-0.13	0.4165	-0.19 (1.15)	-0.09 (1.08)	-0.01 (0.84)	-0.26 (0.19)	-0.07 (0.23)	-0.04 (0.26)	-0.19	0.52321	-0.23	0.48245	-0.04	0.91916	0.11	0.487		0.55 (0.49)	-0.05 (1.05)	-0.15 (1.25)	0.57 (0.24)	-0.01 (0.13)	-0.17 (0.14)	0.58	0.0331	0.75
915	FURIN	FURIN	P09958	186	EMIF-AD MBD	MRM	NA		-1	0	1			0 (1)	-0.96 (1.25)	-0.19 (1.05)	-0.08 (0.17)	-0.97 (0.16)	-0.14 (0.12)	0.89	0.00013	0.06	0.79382	-0.83	4e-05	-0.62 (1.04)	-1.2 (1.11)	-1.26 (1.66)	-0.71 (0.25)	-1.16 (0.29)	-1.33 (0.33)	0.46	0.24006	0.62	0.12442	0.17	0.70503	-0.33	0.1418		0 (1.15)	-0.32 (0.9)	-0.11 (1.16)	0.02 (0.3)	-0.27 (0.18)	-0.12 (0.18)	0.28	0.41969	0.14
916	FUT11	FUT11	Q495W5	206	EMIF-AD MBD	MRM	NA		0	1	0			0 (1)	0.05 (1.03)	0.19 (1.11)	-0.14 (0.15)	0.03 (0.16)	0.28 (0.11)	-0.17	0.42313	-0.42	0.0305	-0.25	0.19226	0.03 (1.09)	0.21 (0.97)	-0.11 (1.07)	-0.09 (0.24)	0.15 (0.29)	-0.16 (0.32)	-0.24	0.51651	0.07	0.86607	0.31	0.47177	-0.03	0.8754		-0.34 (1.13)	0.25 (0.87)	0.32 (1.31)	-0.28 (0.28)	0.33 (0.16)	0.29 (0.17)	-0.61	0.05381	-0.57
918	FXYD6	FXYD6	Q9H0Q3	171	EMIF-AD MBD	MRM	NA		0	0	0			0 (1)	0.13 (0.93)	0.05 (0.91)	-0.05 (0.16)	0.12 (0.15)	0.07 (0.1)	-0.16	0.44565	-0.12	0.53997	0.05	0.80591	0.3 (0.7)	0.01 (1.1)	0.02 (1.04)	0.23 (0.23)	0 (0.23)	-0.03 (0.34)	0.23	0.48097	0.26	0.51486	0.03	0.9323	-0.12	0.5298		0.5 (1.05)	-0.21 (0.91)	0.26 (0.79)	0.63 (0.29)	-0.19 (0.13)	0.25 (0.15)	0.82	0.01015	0.38
920	FZD2	FZD2	Q14332	97	EMIF-AD MBD	MRM	NA		-1	0	1			0 (1)	-0.56 (0.71)	-0.1 (0.77)	0 (0.19)	-0.58 (0.15)	-0.09 (0.11)	0.58	0.02002	0.09	0.69942	-0.49	0.01236	-0.3 (0.52)	-0.9 (0.92)	-0.6 (0.63)	-0.35 (0.22)	-0.92 (0.26)	-0.57 (0.28)	0.57	0.10069	0.22	0.5413	-0.35	0.36678	-0.17	0.3587		-0.65 (1)	0 (0.64)	-0.06 (0.81)	-0.68 (0.3)	0.02 (0.16)	-0.04 (0.15)	-0.69	0.04721	-0.64
924	GAA	GAA	P10253	310	EMIF-AD MBD	MRM	NA		0	1	1			0 (1)	-0.13 (0.84)	0.28 (0.77)	-0.03 (0.1)	-0.14 (0.1)	0.3 (0.07)	0.11	0.43759	-0.33	0.00882	-0.44	0.00028	0.05 (0.75)	-0.18 (0.82)	-0.44 (1)	0 (0.13)	-0.18 (0.16)	-0.45 (0.19)	0.18	0.38753	0.45	0.05321	0.27	0.27926	-0.23	0.0645		0.38 (0.71)	0.29 (0.71)	0.25 (0.85)	0.41 (0.17)	0.31 (0.1)	0.24 (0.1)	0.1	0.62213	0.17
927	GABARAPL2	GABARAPL2	P60520	147	EMIF-AD MBD	MRM	NA		-1	0	1			0 (1)	-0.65 (0.96)	0.36 (1.28)	0.06 (0.23)	-0.64 (0.19)	0.33 (0.13)	0.7	0.01865	-0.27	0.32871	-0.97	6e-05	-0.64 (0.78)	-0.42 (1.15)	-0.97 (1.26)	-0.59 (0.26)	-0.42 (0.39)	-0.96 (0.45)	-0.17	0.72598	0.37	0.48012	0.54	0.36974	-0.21	0.3224		0.08 (1.29)	0.65 (1.27)	0.16 (1.26)	-0.02 (0.35)	0.65 (0.2)	0.16 (0.21)	-0.66	0.10166	-0.17
933	GALNS	GALNS	P34059	235	EMIF-AD MBD	MRM	NA		0	1	1			0 (1)	-0.03 (1.02)	0.17 (0.88)	-0.17 (0.13)	-0.04 (0.12)	0.26 (0.09)	-0.13	0.43881	-0.43	0.00908	-0.3	0.04396	0.05 (1.13)	-0.13 (0.91)	-0.05 (1)	-0.07 (0.17)	-0.15 (0.2)	-0.09 (0.25)	0.08	0.77145	0.01	0.96711	-0.06	0.84001	0	0.9949		0.43 (1.13)	0.07 (0.8)	0.18 (0.86)	0.53 (0.22)	0.12 (0.12)	0.17 (0.14)	0.41	0.10703	0.36
934	GALNT1	GALNT1	Q10472	228	EMIF-AD MBD	MRM	NA		-1	0	1			0 (1)	-0.42 (1.08)	0.08 (0.84)	0.07 (0.12)	-0.42 (0.13)	0.03 (0.09)	0.49	0.00656	0.04	0.81267	-0.46	0.00494	-0.59 (1.09)	-0.1 (1.01)	-0.65 (1.16)	-0.58 (0.19)	-0.09 (0.21)	-0.59 (0.31)	-0.49	0.08928	0.01	0.98468	0.5	0.18324	-0.02	0.9188		0.15 (1)	0.02 (0.74)	0.12 (0.9)	0.14 (0.24)	-0.01 (0.13)	0.13 (0.14)	0.16	0.56208	0.01
935	GALNT10	GALNT10	Q86SR1	310	EMIF-AD MBD	MRM	NA		0	0	1			0 (1)	-0.02 (0.95)	0.27 (0.82)	0.01 (0.1)	-0.02 (0.1)	0.26 (0.08)	0.03	0.82903	-0.26	0.05741	-0.29	0.02435	0.01 (0.98)	0.03 (0.98)	-0.13 (0.9)	0 (0.15)	0.03 (0.18)	-0.12 (0.21)	-0.04	0.86698	0.12	0.64178	0.16	0.56562	-0.05	0.7058		0.19 (0.96)	0.38 (0.82)	0.17 (0.75)	0.2 (0.19)	0.37 (0.11)	0.17 (0.11)	-0.18	0.41692	0.03
937	GALNT13	GALNT13	Q8IUC8	302	EMIF-AD MBD	MRM	NA		0	0	1	Decrease		0 (1)	-0.31 (0.89)	0.09 (0.75)	-0.06 (0.1)	-0.31 (0.1)	0.12 (0.07)	0.26	0.06897	-0.18	0.18425	-0.43	0.00045	-0.13 (0.83)	-0.32 (0.66)	-0.67 (1.2)	-0.18 (0.14)	-0.31 (0.16)	-0.69 (0.19)	0.13	0.53873	0.51	0.03187	0.38	0.13592	-0.27	0.0417	Decrease linear	0.12 (0.86)	0.16 (0.71)	0 (0.74)	0.14 (0.18)	0.19 (0.1)	-0.01 (0.1)	-0.06	0.77759	0.15
938	GALNT15	GALNT15	Q8N3T1	223	EMIF-AD MBD	MRM	NA		0	0	0			0 (1)	-0.25 (0.93)	0.07 (1.01)	0.02 (0.14)	-0.23 (0.14)	0.05 (0.1)	0.25	0.19482	-0.03	0.85697	-0.28	0.08974	-0.37 (1.1)	-0.07 (0.82)	-0.19 (0.59)	-0.31 (0.2)	-0.09 (0.25)	-0.16 (0.28)	-0.22	0.48907	-0.15	0.66135	0.07	0.85007	0.09	0.5978		0.04 (1.07)	0.03 (1.04)	0.12 (0.97)	0.03 (0.27)	0 (0.14)	0.12 (0.14)	0.02	0.93788	-0.09
939	GALNT16	GALNT16	Q8N428	226	EMIF-AD MBD	MRM	NA		0	0	0	Decrease		0 (1)	-0.09 (0.98)	0.18 (1.02)	0.04 (0.14)	-0.11 (0.12)	0.17 (0.1)	0.15	0.41794	-0.14	0.45671	-0.29	0.07528	0.18 (0.9)	-0.25 (0.94)	-0.55 (1.1)	0.19 (0.18)	-0.3 (0.22)	-0.54 (0.28)	0.49	0.08456	0.74	0.02712	0.25	0.48924	-0.37	0.0218	Decrease linear	0.09 (1.09)	0.38 (0.96)	-0.01 (1.04)	0.13 (0.23)	0.35 (0.14)	0.01 (0.15)	-0.22	0.41169	0.12
940	GALNT17	GALNT17	Q6IS24	152	EMIF-AD MBD	MRM	NA		0	0	1			0 (1)	-0.28 (0.83)	0.21 (0.96)	-0.12 (0.16)	-0.3 (0.17)	0.27 (0.1)	0.18	0.43658	-0.39	0.05456	-0.57	0.00416	0.05 (0.55)	-0.39 (0.91)	-0.72 (0.99)	-0.07 (0.26)	-0.41 (0.27)	-0.71 (0.34)	0.34	0.36158	0.64	0.13674	0.3	0.49589	-0.35	0.0717		0.27 (1.05)	0.2 (0.97)	0.21 (0.94)	0.36 (0.27)	0.24 (0.14)	0.18 (0.16)	0.12	0.68868	0.18
941	GALNT18	GALNT18	Q6P9A2	310	EMIF-AD MBD	MRM	NA		0	0	1		Decrease	0 (1)	-0.33 (0.91)	0.1 (0.77)	-0.07 (0.1)	-0.34 (0.1)	0.15 (0.07)	0.27	0.05116	-0.22	0.08884	-0.49	7e-05	-0.16 (0.77)	-0.38 (1.03)	-0.62 (0.98)	-0.24 (0.14)	-0.38 (0.16)	-0.63 (0.2)	0.13	0.53174	0.39	0.10644	0.25	0.32566	-0.2	0.1267		0.3 (0.85)	0.13 (0.75)	0.01 (0.76)	0.34 (0.18)	0.17 (0.1)	0 (0.1)	0.17	0.40573	0.35
942	GALNT2	GALNT2	Q10471	310	EMIF-AD MBD	MRM	NA		0	1	1			0 (1)	-0.25 (0.9)	0.3 (0.81)	-0.04 (0.1)	-0.26 (0.1)	0.33 (0.07)	0.22	0.12173	-0.36	0.0058	-0.58	0	-0.07 (0.91)	-0.37 (0.83)	-0.46 (0.97)	-0.14 (0.14)	-0.36 (0.17)	-0.46 (0.2)	0.22	0.32393	0.32	0.19414	0.1	0.7018	-0.18	0.17		0.42 (0.86)	0.31 (0.8)	0.24 (0.81)	0.45 (0.18)	0.35 (0.1)	0.23 (0.11)	0.11	0.60725	0.22
945	GALNT6	GALNT6	Q8NCL4	213	EMIF-AD MBD	MRM	NA		-1	0	1			0 (1)	-0.47 (0.83)	0.2 (0.86)	-0.03 (0.13)	-0.48 (0.12)	0.22 (0.09)	0.46	0.01031	-0.25	0.12661	-0.7	1e-05	-0.64 (0.75)	-0.23 (0.87)	-0.44 (0.94)	-0.7 (0.18)	-0.23 (0.21)	-0.42 (0.27)	-0.47	0.088	-0.28	0.39455	0.19	0.5742	0.14	0.3889		0.01 (1.2)	0.32 (0.72)	0.14 (0.87)	0.03 (0.23)	0.35 (0.13)	0.13 (0.13)	-0.32	0.22051	-0.1
946	GALNT7	GALNT7	Q86SF2	310	EMIF-AD MBD	MRM	NA		0	0	1	Decrease		0 (1)	-0.27 (0.84)	0.23 (0.8)	-0.01 (0.1)	-0.28 (0.1)	0.24 (0.07)	0.26	0.0631	-0.25	0.05269	-0.51	4e-05	-0.09 (0.88)	-0.3 (0.71)	-0.61 (0.84)	-0.12 (0.14)	-0.29 (0.16)	-0.62 (0.2)	0.17	0.42475	0.5	0.03916	0.32	0.20809	-0.25	0.044	Decrease linear	0.35 (0.72)	0.29 (0.74)	0.11 (0.88)	0.37 (0.18)	0.31 (0.1)	0.11 (0.1)	0.06	0.75314	0.27
947	GALNTL6	GALNTL6	Q49A17	141	EMIF-AD MBD	MRM	NA		0	0	0			0 (1)	-0.15 (1.04)	-0.28 (1.13)	0 (0.21)	-0.15 (0.18)	-0.28 (0.13)	0.15	0.57781	0.29	0.26261	0.14	0.54913	-0.14 (1.09)	0.06 (1.16)	-0.61 (0.33)	-0.12 (0.28)	0.06 (0.31)	-0.62 (0.46)	-0.18	0.66981	0.5	0.35053	0.68	0.2212	-0.12	0.6277		-0.5 (1.36)	-0.13 (1.1)	-0.38 (1.1)	-0.5 (0.35)	-0.14 (0.19)	-0.38 (0.21)	-0.36	0.37203	-0.13
948	GANAB	GANAB	Q14697	310	EMIF-AD MBD	MRM	NA		-1	0	1	Decrease		0 (1)	-0.47 (1.06)	-0.04 (0.83)	-0.08 (0.11)	-0.48 (0.11)	0.01 (0.08)	0.4	0.00758	-0.09	0.49864	-0.5	0.00017	-0.07 (0.93)	-0.7 (0.98)	-1 (1.15)	-0.17 (0.15)	-0.69 (0.18)	-1.02 (0.21)	0.52	0.02688	0.85	0.00124	0.33	0.24037	-0.45	0.0027	Decrease linear	0.06 (0.88)	0.03 (0.76)	-0.14 (0.9)	0.1 (0.19)	0.08 (0.11)	-0.15 (0.11)	0.03	0.89921	0.26
949	GAP43	GAP43	P17677	310	EMIF-AD MBD	MRM	NA		-1	1	1			0 (1)	-0.37 (0.91)	0.99 (0.85)	-0.01 (0.1)	-0.38 (0.1)	1 (0.08)	0.37	0.01217	-1.01	0	-1.38	0	-0.19 (0.73)	-0.43 (0.92)	-0.68 (1.18)	-0.24 (0.15)	-0.43 (0.18)	-0.68 (0.21)	0.19	0.41286	0.44	0.08513	0.25	0.357	-0.23	0.0867		0.96 (0.96)	1.02 (0.74)	0.97 (0.93)	0.99 (0.19)	1.04 (0.11)	0.96 (0.11)	-0.06	0.79745	0.03
950	GAPDH	GAPDH	P04406	310	EMIF-AD MBD	MRM	NA		0	1	1			0 (1)	-0.03 (0.87)	0.27 (0.91)	-0.06 (0.11)	-0.04 (0.1)	0.3 (0.08)	-0.02	0.89327	-0.36	0.00909	-0.34	0.00926	0.17 (0.79)	-0.24 (0.68)	-0.16 (1.17)	0.11 (0.15)	-0.24 (0.18)	-0.17 (0.22)	0.35	0.14408	0.28	0.29001	-0.07	0.80797	-0.19	0.1376		0.17 (0.95)	0.27 (0.98)	0.3 (0.83)	0.2 (0.2)	0.29 (0.11)	0.29 (0.11)	-0.09	0.68553	-0.09
951	GAPDHS	GAPDHS	O14556	270	EMIF-AD MBD	MRM	NA		0	1	1			0 (1)	-0.13 (1.01)	0.38 (0.9)	-0.09 (0.12)	-0.13 (0.11)	0.43 (0.08)	0.04	0.81419	-0.53	0.00065	-0.57	9e-05	0.14 (0.87)	-0.47 (0.98)	-0.28 (1.21)	0.06 (0.16)	-0.46 (0.21)	-0.3 (0.25)	0.52	0.04856	0.36	0.22343	-0.16	0.61073	-0.25	0.1239		0.23 (0.97)	0.36 (0.83)	0.45 (0.96)	0.28 (0.23)	0.4 (0.12)	0.43 (0.12)	-0.12	0.65532	-0.15
954	GAS6	GAS6	Q14393	310	EMIF-AD MBD	MRM	NA		0	1	1			0 (1)	0.01 (1.03)	0.39 (0.91)	0.02 (0.11)	0.01 (0.11)	0.38 (0.08)	0.01	0.94049	-0.36	0.01344	-0.37	0.00706	0.19 (1)	-0.15 (1.01)	-0.12 (1.1)	0.17 (0.16)	-0.15 (0.19)	-0.12 (0.23)	0.33	0.1948	0.3	0.28728	-0.03	0.92157	-0.16	0.2926		0.33 (0.9)	0.59 (0.93)	0.2 (0.85)	0.34 (0.21)	0.6 (0.12)	0.19 (0.12)	-0.27	0.25661	0.15
955	GBA	GBA	P04062	260	EMIF-AD MBD	MRM	NA		0	0	0			0 (1)	0.14 (0.88)	0.18 (0.99)	0.01 (0.12)	0.14 (0.12)	0.18 (0.09)	-0.13	0.46313	-0.17	0.28289	-0.04	0.78531	0.27 (0.93)	0.08 (0.86)	-0.04 (0.82)	0.28 (0.18)	0.07 (0.22)	-0.04 (0.28)	0.21	0.45764	0.32	0.33647	0.11	0.75709	-0.18	0.238		0.03 (0.82)	0.31 (1.07)	0.07 (0.95)	0.03 (0.23)	0.3 (0.13)	0.08 (0.13)	-0.27	0.29738	-0.05
957	GC	GC	P02774	249	ADNI	MRM	1	2	0	0	0			0 (0.99)	-0.11 (1.06)	-0.11 (0.85)	-0.02 (0.13)	-0.17 (0.1)	-0.13 (0.09)	0.14	0.39013	0.1	0.50548	-0.04	0.77337	-0.34 (0.91)	-0.1 (1.16)	0.08 (1)	-0.3 (0.21)	-0.18 (0.14)	0 (0.2)	-0.12	0.62113	-0.3	0.29481	-0.18	0.46225	0.18	0.2917		0.15 (0.78)	-0.13 (0.84)	-0.16 (0.89)	-0.03 (0.27)	-0.14 (0.12)	-0.13 (0.14)	0.12	0.68301	0.11
958	GC	GC	P02774	310	EMIF-AD MBD	MRM	NA	1	1	0	2	Increase		0 (1)	0.42 (0.91)	-0.24 (1.08)	-0.08 (0.12)	0.43 (0.11)	-0.2 (0.08)	-0.51	0.00221	0.12	0.42913	0.63	2e-05	0.14 (0.82)	0.57 (0.8)	0.83 (1.06)	0.1 (0.17)	0.57 (0.21)	0.8 (0.24)	-0.47	0.08061	-0.71	0.01818	-0.24	0.45795	0.35	0.0078	Increase linear	-0.42 (1.38)	-0.27 (0.83)	-0.13 (1.22)	-0.42 (0.22)	-0.23 (0.12)	-0.15 (0.13)	-0.18	0.46458	-0.27
961	GDA	GDA	Q9Y2T3	310	EMIF-AD MBD	MRM	NA		0	1	1			0 (1)	-0.17 (0.95)	1.05 (0.84)	-0.07 (0.1)	-0.18 (0.1)	1.09 (0.07)	0.11	0.43257	-1.16	0	-1.27	0	-0.06 (0.79)	-0.25 (1.05)	-0.28 (1.11)	-0.15 (0.15)	-0.25 (0.18)	-0.29 (0.21)	0.1	0.67148	0.14	0.58593	0.04	0.87956	-0.1	0.4726		1.07 (0.96)	1.05 (0.73)	1.04 (0.92)	1.12 (0.19)	1.1 (0.11)	1.02 (0.11)	0.02	0.9263	0.09
963	GDF11	GDF11	O95390	286	EMIF-AD MBD	MRM	NA		0	0	1			0 (1)	-0.31 (0.95)	0.16 (0.87)	-0.03 (0.11)	-0.31 (0.11)	0.18 (0.08)	0.28	0.07521	-0.21	0.16211	-0.49	0.00045	-0.14 (0.83)	-0.36 (0.81)	-0.56 (1.32)	-0.19 (0.16)	-0.37 (0.19)	-0.56 (0.23)	0.18	0.46078	0.38	0.17352	0.2	0.50578	-0.22	0.1325		0.21 (0.99)	0.25 (0.76)	0.03 (0.95)	0.23 (0.21)	0.27 (0.11)	0.03 (0.12)	-0.04	0.8589	0.2
965	GDI1	GDI1	P31150	310	EMIF-AD MBD	MRM	NA		0	1	1			0 (1)	-0.19 (0.99)	1.12 (0.87)	0.03 (0.11)	-0.19 (0.1)	1.11 (0.08)	0.22	0.13596	-1.08	0	-1.3	0	-0.08 (0.88)	-0.19 (0.91)	-0.41 (1.29)	-0.09 (0.15)	-0.19 (0.18)	-0.4 (0.22)	0.1	0.67895	0.3	0.25402	0.21	0.4735	-0.18	0.2226		0.81 (1.08)	1.14 (0.68)	1.2 (0.95)	0.83 (0.2)	1.13 (0.11)	1.21 (0.11)	-0.3	0.18039	-0.38
966	GDI2	GDI2	P50395	227	EMIF-AD MBD	MRM	NA		0	0	0			0 (1)	-0.08 (0.5)	0 (0.8)	0.02 (0.11)	-0.09 (0.11)	-0.01 (0.08)	0.11	0.46764	0.03	0.844	-0.08	0.53122	-0.06 (0.53)	-0.08 (0.42)	-0.13 (0.56)	-0.06 (0.14)	-0.1 (0.18)	-0.11 (0.2)	0.04	0.84697	0.06	0.80769	0.02	0.9544	-0.03	0.7682		-0.18 (0.97)	0.02 (0.82)	0.03 (0.74)	-0.16 (0.18)	0.01 (0.1)	0.03 (0.1)	-0.16	0.4355	-0.19
967	GFAP	GFAP	P14136	249	ADNI	MRM	0		0	1	1			0 (1)	0.07 (1.22)	0.87 (1.41)	-0.05 (0.16)	0 (0.13)	0.87 (0.11)	-0.05	0.80185	-0.92	0	-0.87	0	-0.06 (1.53)	-0.06 (1.09)	0.47 (1.11)	-0.02 (0.27)	-0.18 (0.19)	0.38 (0.27)	0.16	0.61941	-0.4	0.29587	-0.56	0.08068	0.26	0.1593		0.92 (0.99)	0.81 (1.29)	0.94 (1.7)	0.57 (0.35)	0.84 (0.15)	0.99 (0.19)	-0.27	0.48004	-0.42
970	GFRA2	GFRA2	O00451	310	EMIF-AD MBD	MRM	NA		-1	1	1	Decrease	Decrease	0 (1)	-0.66 (0.88)	0.3 (0.94)	0.02 (0.11)	-0.68 (0.1)	0.3 (0.08)	0.69	1e-05	-0.28	0.04417	-0.97	0	-0.38 (0.79)	-0.76 (0.87)	-1.13 (0.88)	-0.4 (0.15)	-0.76 (0.18)	-1.12 (0.22)	0.36	0.13131	0.72	0.00663	0.36	0.20093	-0.37	0.0038	Decrease linear	0.55 (1.08)	0.4 (0.88)	0.11 (0.94)	0.58 (0.19)	0.4 (0.11)	0.11 (0.11)	0.18	0.42489	0.47
971	GFRA3	GFRA3	O60609	154	EMIF-AD MBD	MRM	NA		0	0	0			0 (1)	-0.18 (0.88)	0.12 (1.19)	0 (0.18)	-0.19 (0.17)	0.12 (0.13)	0.19	0.44728	-0.12	0.61973	-0.31	0.15456	-0.12 (1.05)	-0.24 (0.64)	-0.23 (0.91)	-0.17 (0.26)	-0.22 (0.31)	-0.25 (0.42)	0.05	0.89453	0.09	0.85981	0.03	0.94959	-0.06	0.7417		0.53 (1.28)	0.18 (1.08)	-0.11 (1.29)	0.53 (0.35)	0.21 (0.19)	-0.12 (0.21)	0.32	0.4153	0.65
973	GGCT	GGCT	O75223	285	EMIF-AD MBD	MRM	NA		-1	1	1			0 (1)	-0.43 (1)	0.55 (0.94)	-0.03 (0.12)	-0.43 (0.11)	0.56 (0.08)	0.4	0.01612	-0.6	0.00014	-1	0	-0.26 (0.64)	-0.41 (1.18)	-0.81 (1.29)	-0.34 (0.17)	-0.4 (0.2)	-0.8 (0.24)	0.06	0.83341	0.46	0.11745	0.4	0.19443	-0.24	0.1206		0.46 (1.21)	0.58 (0.83)	0.53 (0.98)	0.49 (0.23)	0.61 (0.12)	0.53 (0.13)	-0.11	0.65665	-0.04
974	GGH	GGH	Q92820	310	EMIF-AD MBD	MRM	NA		0	0	0			0 (1)	-0.05 (1.01)	0.02 (0.89)	-0.14 (0.11)	-0.07 (0.1)	0.1 (0.08)	-0.07	0.64749	-0.24	0.08255	-0.17	0.1896	0.16 (1.08)	-0.14 (0.86)	-0.38 (1.02)	0.03 (0.16)	-0.13 (0.19)	-0.4 (0.22)	0.16	0.50193	0.43	0.11276	0.26	0.35889	-0.21	0.1521		0.09 (0.92)	-0.02 (0.87)	0.05 (0.92)	0.15 (0.2)	0.05 (0.11)	0.03 (0.12)	0.1	0.6702	0.12
978	GINM1	GINM1	Q9NU53	175	EMIF-AD MBD	MRM	NA		0	0	0			0 (1)	-0.24 (0.75)	0.06 (0.95)	0.05 (0.15)	-0.24 (0.13)	0.03 (0.11)	0.3	0.12607	0.02	0.91178	-0.28	0.09723	-0.2 (0.77)	-0.27 (0.68)	-0.27 (0.85)	-0.19 (0.19)	-0.27 (0.21)	-0.28 (0.27)	0.08	0.78175	0.09	0.77302	0.01	0.96636	-0.05	0.7191		0.18 (0.72)	0.25 (0.79)	-0.21 (1.14)	0.19 (0.26)	0.24 (0.15)	-0.21 (0.16)	-0.05	0.85521	0.4
981	GLDN	GLDN	Q6ZMI3	310	EMIF-AD MBD	MRM	NA		0	0	0			0 (1)	0.01 (0.98)	0.12 (0.89)	-0.04 (0.11)	0 (0.11)	0.14 (0.08)	-0.04	0.78655	-0.18	0.20416	-0.14	0.30235	0.06 (0.92)	-0.02 (0.99)	-0.06 (1.12)	0 (0.16)	-0.01 (0.19)	-0.08 (0.22)	0.01	0.95361	0.08	0.78007	0.06	0.83251	-0.07	0.639		0.36 (1.17)	0.09 (0.81)	0.06 (0.87)	0.38 (0.2)	0.13 (0.11)	0.05 (0.12)	0.26	0.26676	0.33
982	GLG1	GLG1	Q92896	294	EMIF-AD MBD	MRM	NA		0	1	1			0 (1)	-0.12 (1.17)	0.26 (0.9)	-0.06 (0.12)	-0.13 (0.12)	0.3 (0.09)	0.07	0.66088	-0.36	0.02123	-0.43	0.00311	-0.04 (1.03)	0.04 (1.42)	-0.48 (1.04)	-0.14 (0.18)	0.04 (0.2)	-0.5 (0.24)	-0.18	0.49718	0.35	0.23825	0.54	0.08968	-0.2	0.2693		0.15 (1.18)	0.28 (0.94)	0.27 (0.76)	0.19 (0.23)	0.32 (0.13)	0.27 (0.13)	-0.13	0.61844	-0.07
983	GLO1	GLO1	Q04760	204	EMIF-AD MBD	MRM	NA		0	0	0			0 (1)	0.4 (1.67)	0.76 (1.31)	0.19 (0.21)	0.4 (0.18)	0.67 (0.14)	-0.21	0.45636	-0.48	0.07145	-0.27	0.2339	0.04 (1.36)	0.7 (2.07)	0.91 (1.64)	0.1 (0.26)	0.7 (0.33)	0.98 (0.47)	-0.6	0.16119	-0.88	0.10234	-0.28	0.62717	0.44	0.1405		-0.14 (0.99)	1.19 (1.23)	0.55 (1.31)	-0.16 (0.39)	1.1 (0.21)	0.6 (0.22)	-1.27	0.00454	-0.76
984	GLOD4	GLOD4	Q9HC38	178	EMIF-AD MBD	MRM	NA		0	1	1			0 (1)	-0.04 (0.95)	0.63 (0.98)	0.09 (0.16)	-0.03 (0.15)	0.59 (0.1)	0.12	0.59027	-0.5	0.01261	-0.62	0.00072	0.13 (0.85)	-0.26 (1.08)	0.04 (0.89)	0.2 (0.24)	-0.26 (0.24)	0.06 (0.34)	0.46	0.1767	0.14	0.73881	-0.32	0.44141	-0.12	0.5725		0.68 (0.92)	0.69 (1.1)	0.56 (0.9)	0.71 (0.25)	0.64 (0.15)	0.57 (0.15)	0.06	0.82482	0.14
985	GLRX	GLRX	P35754	287	EMIF-AD MBD	MRM	NA		0	1	1	Decrease		0 (1)	-0.24 (0.99)	0.48 (0.75)	0.01 (0.11)	-0.25 (0.11)	0.48 (0.08)	0.27	0.07634	-0.47	0.00066	-0.74	0	-0.16 (0.82)	-0.01 (0.98)	-0.69 (1.18)	-0.18 (0.16)	-0.01 (0.18)	-0.69 (0.2)	-0.17	0.47541	0.51	0.04264	0.68	0.01122	-0.26	0.0859	Decrease non-linear	0.4 (0.85)	0.63 (0.64)	0.35 (0.81)	0.41 (0.19)	0.64 (0.11)	0.35 (0.11)	-0.22	0.29874	0.07
987	GM2A	GM2A	P17900	310	EMIF-AD MBD	MRM	NA		-1	1	1			0 (1)	-0.46 (0.87)	0.37 (0.73)	0.05 (0.1)	-0.46 (0.1)	0.35 (0.07)	0.52	0.0002	-0.29	0.02039	-0.81	0	-0.34 (0.81)	-0.55 (0.83)	-0.6 (1.05)	-0.31 (0.13)	-0.55 (0.16)	-0.59 (0.19)	0.23	0.26228	0.28	0.2293	0.04	0.85785	-0.16	0.2185		0.4 (0.82)	0.48 (0.7)	0.25 (0.73)	0.39 (0.17)	0.46 (0.1)	0.26 (0.1)	-0.07	0.73399	0.13
988	GMFB	GMFB	P60983	296	EMIF-AD MBD	MRM	NA		-1	1	1			0 (1)	-0.35 (1.11)	0.76 (0.77)	0 (0.11)	-0.36 (0.11)	0.76 (0.08)	0.36	0.01949	-0.76	0	-1.12	0	-0.34 (1.26)	-0.28 (0.85)	-0.48 (1.11)	-0.38 (0.15)	-0.28 (0.19)	-0.49 (0.23)	-0.1	0.68796	0.11	0.69284	0.21	0.48607	-0.04	0.7903		0.68 (0.99)	0.78 (0.66)	0.75 (0.81)	0.71 (0.2)	0.8 (0.12)	0.75 (0.12)	-0.09	0.701	-0.04
989	GMFG	GMFG	O60234	286	EMIF-AD MBD	MRM	NA		-1	1	1			0 (1)	-0.38 (1.13)	0.78 (0.76)	0.01 (0.11)	-0.39 (0.11)	0.78 (0.08)	0.4	0.01186	-0.77	0	-1.17	0	-0.36 (1.28)	-0.31 (0.87)	-0.52 (1.14)	-0.4 (0.16)	-0.3 (0.2)	-0.53 (0.23)	-0.09	0.7161	0.13	0.64555	0.22	0.46946	-0.06	0.7143		0.63 (0.85)	0.83 (0.65)	0.77 (0.84)	0.66 (0.21)	0.84 (0.12)	0.77 (0.12)	-0.18	0.44335	-0.11
990	GNAS	GNAS	O95467	267	EMIF-AD MBD	MRM	NA		-1	0	1			0 (1)	-0.31 (0.82)	-0.05 (0.7)	-0.01 (0.1)	-0.3 (0.1)	-0.04 (0.07)	0.29	0.04819	0.03	0.80524	-0.26	0.04295	-0.34 (0.91)	-0.33 (0.8)	-0.17 (0.63)	-0.37 (0.14)	-0.3 (0.17)	-0.21 (0.22)	-0.07	0.75057	-0.17	0.52285	-0.1	0.72927	0.06	0.6515		-0.15 (0.86)	-0.01 (0.68)	-0.06 (0.68)	-0.13 (0.17)	0.01 (0.1)	-0.07 (0.1)	-0.14	0.468	-0.06
996	GNPTG	GNPTG	Q9UJJ9	310	EMIF-AD MBD	MRM	NA		0	1	1			0 (1)	-0.13 (0.99)	0.25 (0.75)	-0.02 (0.1)	-0.13 (0.1)	0.27 (0.07)	0.11	0.45246	-0.29	0.03037	-0.4	0.00173	-0.1 (0.91)	-0.13 (1.24)	-0.19 (0.78)	-0.12 (0.14)	-0.13 (0.17)	-0.19 (0.21)	0.01	0.96449	0.07	0.77496	0.06	0.81873	-0.04	0.7661		0.18 (0.77)	0.25 (0.74)	0.28 (0.76)	0.19 (0.18)	0.27 (0.1)	0.27 (0.11)	-0.08	0.70685	-0.08
997	GNRH1	GNRH1	P01148	206	EMIF-AD MBD	MRM	NA		0	0	0			0 (1)	-0.02 (1.02)	-0.02 (0.91)	-0.04 (0.13)	-0.03 (0.13)	0.01 (0.1)	-0.01	0.96177	-0.05	0.77663	-0.04	0.80733	-0.02 (0.85)	0 (0.93)	-0.05 (1.44)	-0.13 (0.21)	0 (0.22)	-0.06 (0.27)	-0.13	0.6667	-0.07	0.83912	0.06	0.86183	0	0.9909		0.09 (0.66)	-0.05 (0.98)	-0.04 (0.93)	0.16 (0.23)	0.01 (0.15)	-0.05 (0.15)	0.15	0.57606	0.21
998	GNS	GNS	P15586	303	EMIF-AD MBD	MRM	NA		0	0	0			0 (1)	0.08 (1.14)	-0.13 (0.97)	-0.18 (0.12)	0.06 (0.11)	-0.03 (0.08)	-0.24	0.13644	-0.15	0.32048	0.09	0.51127	0.21 (1.18)	0.08 (1.09)	-0.2 (1.15)	0.03 (0.17)	0.09 (0.2)	-0.24 (0.24)	-0.06	0.81261	0.26	0.36605	0.33	0.29754	-0.11	0.5069		-0.11 (1.1)	-0.21 (0.92)	-0.05 (1)	-0.02 (0.22)	-0.1 (0.12)	-0.08 (0.13)	0.08	0.7388	0.06
999	GOLIM4	GOLIM4	O00461	310	EMIF-AD MBD	MRM	NA		-1	0	1			0 (1)	-0.32 (0.89)	0.22 (0.91)	0.09 (0.11)	-0.32 (0.1)	0.17 (0.08)	0.41	0.00626	-0.08	0.53945	-0.5	0.00017	-0.23 (0.85)	-0.42 (1.03)	-0.38 (0.82)	-0.18 (0.15)	-0.42 (0.18)	-0.37 (0.22)	0.23	0.33071	0.18	0.49079	-0.05	0.86055	-0.13	0.3304		0.24 (0.91)	0.32 (0.93)	0.11 (0.89)	0.23 (0.2)	0.29 (0.11)	0.12 (0.11)	-0.06	0.7896	0.11
1000	GOLM1	GOLM1	Q8NBJ4	249	ADNI	MRM	0	2	-1	1	1			0 (1)	-0.37 (0.85)	0.38 (1)	-0.02 (0.13)	-0.38 (0.1)	0.39 (0.09)	0.36	0.03031	-0.42	0.00871	-0.78	0	-0.37 (0.97)	-0.3 (0.88)	-0.5 (0.67)	-0.37 (0.2)	-0.32 (0.14)	-0.51 (0.2)	-0.05	0.84716	0.14	0.62934	0.19	0.44086	-0.04	0.7707		0.44 (0.95)	0.44 (0.84)	0.27 (1.22)	0.31 (0.26)	0.48 (0.12)	0.29 (0.14)	-0.17	0.5637	0.02
1001	GOLM1	GOLM1	Q8NBJ4	310	EMIF-AD MBD	MRM	NA	1	-1	1	1	Decrease		0 (1)	-0.34 (0.81)	0.22 (0.75)	-0.03 (0.1)	-0.35 (0.09)	0.24 (0.07)	0.32	0.01712	-0.27	0.03291	-0.59	0	-0.11 (0.8)	-0.49 (0.74)	-0.62 (0.85)	-0.17 (0.13)	-0.49 (0.15)	-0.63 (0.18)	0.31	0.12266	0.45	0.04377	0.14	0.55691	-0.23	0.0475	Decrease linear	0.23 (0.73)	0.3 (0.71)	0.13 (0.81)	0.26 (0.17)	0.33 (0.09)	0.12 (0.1)	-0.06	0.73271	0.15
1002	GOLM1_DQLVIPDGQEEEQEAAGEGR	GOLM1	Q8NBJ4	249	ADNI	MRM	0		0	0	0		Increase	0 (1)	-0.22 (1.08)	-0.31 (2.79)	-0.02 (0.29)	-0.28 (0.23)	-0.33 (0.19)	0.26	0.48463	0.31	0.37593	0.05	0.86089	-0.32 (0.84)	-0.1 (1.17)	-0.4 (1.11)	-0.26 (0.5)	-0.22 (0.35)	-0.53 (0.49)	-0.04	0.94805	0.27	0.70653	0.3	0.60743	-0.02	0.895		-1.46 (4.83)	-0.17 (2.24)	-0.2 (2.78)	-1.66 (0.65)	-0.2 (0.28)	-0.17 (0.35)	-1.46	0.04066	-1.49
1004	GOT1	GOT1	P17174	249	ADNI	MRM	1	2	-1	1	1		Decrease	0 (0.92)	-0.46 (1.22)	1.22 (1.04)	-0.03 (0.15)	-0.51 (0.12)	1.22 (0.1)	0.48	0.0121	-1.25	0	-1.73	0	-0.26 (1.38)	-0.4 (1.13)	-0.8 (1.23)	-0.23 (0.24)	-0.47 (0.17)	-0.87 (0.24)	0.24	0.40851	0.64	0.05843	0.4	0.16138	-0.29	0.1312		1.55 (0.72)	1.41 (1.01)	0.85 (1.08)	1.36 (0.31)	1.41 (0.14)	0.87 (0.17)	-0.05	0.89282	0.49
1005	GOT1	GOT1	P17174	310	EMIF-AD MBD	MRM	NA	1	-1	1	1	Decrease		0 (1)	-0.34 (0.89)	0.74 (0.79)	-0.02 (0.1)	-0.35 (0.1)	0.76 (0.07)	0.32	0.02231	-0.78	0	-1.1	0	-0.12 (0.78)	-0.39 (0.85)	-0.71 (1.09)	-0.19 (0.14)	-0.39 (0.17)	-0.71 (0.2)	0.2	0.3508	0.53	0.02924	0.32	0.20884	-0.26	0.0434	Decrease linear	0.84 (0.89)	0.81 (0.7)	0.63 (0.85)	0.87 (0.18)	0.83 (0.1)	0.62 (0.1)	0.04	0.84899	0.25
1006	GOT1_rbm	GOT1	P17174	270	ADNI	RBM	0	2	0	0	0			0 (1)	0.22 (0.88)	0.11 (0.83)	0 (0.12)	0.22 (0.09)	0.11 (0.08)	-0.22	0.15179	-0.11	0.45857	0.11	0.35931	0.34 (1.03)	0.09 (0.79)	0.39 (0.9)	0.34 (0.18)	0.09 (0.13)	0.38 (0.18)	0.26	0.25431	-0.04	0.89102	-0.29	0.1805	0	0.973		0.08 (0.98)	0.18 (0.79)	0.02 (0.86)	0.1 (0.25)	0.17 (0.1)	0.02 (0.13)	-0.07	0.80388	0.08
1007	GOT2	GOT2	P00505	249	ADNI	MRM	0	2	-1	1	1		Decrease	0 (1)	-0.4 (1.18)	0.89 (0.97)	-0.01 (0.15)	-0.42 (0.12)	0.89 (0.1)	0.41	0.03222	-0.9	0	-1.31	0	-0.45 (1.2)	-0.38 (1.21)	-0.41 (1.16)	-0.45 (0.23)	-0.4 (0.16)	-0.43 (0.23)	-0.04	0.87608	-0.01	0.96409	0.03	0.91465	0.05	0.7993		1.25 (0.75)	1.06 (0.89)	0.53 (1.04)	1.16 (0.31)	1.07 (0.13)	0.54 (0.16)	0.09	0.78228	0.62
1008	GOT2	GOT2	P00505	310	EMIF-AD MBD	MRM	NA	1	0	1	1			0 (1)	-0.28 (0.88)	0.58 (0.76)	-0.05 (0.1)	-0.3 (0.1)	0.61 (0.07)	0.24	0.07377	-0.66	0	-0.91	0	-0.16 (0.74)	-0.32 (0.93)	-0.51 (1.07)	-0.25 (0.13)	-0.31 (0.16)	-0.52 (0.19)	0.07	0.75045	0.27	0.24439	0.2	0.4127	-0.15	0.2357		0.43 (0.92)	0.64 (0.66)	0.56 (0.8)	0.48 (0.17)	0.68 (0.1)	0.55 (0.1)	-0.2	0.30177	-0.07
1009	GPC1	GPC1	P35052	310	EMIF-AD MBD	MRM	NA		0	1	1			0 (1)	-0.2 (0.9)	0.2 (0.82)	-0.05 (0.1)	-0.21 (0.1)	0.23 (0.07)	0.16	0.27383	-0.28	0.03406	-0.44	0.00052	0.01 (0.7)	-0.32 (0.85)	-0.47 (1.26)	-0.06 (0.14)	-0.31 (0.17)	-0.48 (0.2)	0.25	0.25647	0.42	0.09093	0.17	0.53138	-0.23	0.0843		0.33 (1.09)	0.16 (0.78)	0.2 (0.76)	0.37 (0.18)	0.19 (0.1)	0.19 (0.11)	0.18	0.39637	0.18
1010	GPC4	GPC4	O75487	210	EMIF-AD MBD	MRM	NA		1	1	0			0 (1)	0.36 (1.02)	0.28 (0.9)	-0.04 (0.14)	0.35 (0.13)	0.31 (0.1)	-0.4	0.03698	-0.36	0.0477	0.04	0.81326	0.27 (1.16)	0.18 (0.9)	0.83 (0.79)	0.24 (0.21)	0.17 (0.23)	0.82 (0.29)	0.07	0.82677	-0.58	0.09742	-0.65	0.07802	0.27	0.1592		0.4 (1.07)	0.23 (0.82)	0.31 (0.95)	0.43 (0.26)	0.24 (0.15)	0.3 (0.15)	0.18	0.52981	0.12
1013	GPI	GPI	P06744	211	EMIF-AD MBD	MRM	NA		0	1	1		Increase	0 (1)	0.11 (0.91)	0.68 (0.75)	0.07 (0.13)	0.09 (0.12)	0.66 (0.08)	-0.02	0.89459	-0.59	0.0002	-0.57	0.0001	0.03 (0.64)	0.24 (0.85)	0.07 (1.42)	0.06 (0.17)	0.22 (0.19)	0.1 (0.22)	-0.17	0.51711	-0.04	0.883	0.13	0.67302	-0.01	0.9423		0.15 (0.83)	0.76 (0.77)	0.76 (0.66)	0.19 (0.22)	0.71 (0.11)	0.78 (0.11)	-0.52	0.03515	-0.59
1014	GPLD1	GPLD1	P80108	310	EMIF-AD MBD	MRM	NA		0	-1	0			0 (1)	-0.34 (1.02)	-0.63 (0.91)	-0.1 (0.11)	-0.33 (0.11)	-0.58 (0.08)	0.24	0.1229	0.48	0.00065	0.25	0.06323	-0.37 (1.04)	-0.25 (0.97)	-0.39 (1.09)	-0.43 (0.16)	-0.25 (0.19)	-0.43 (0.22)	-0.18	0.45824	-0.01	0.97807	0.17	0.54979	0	0.9756		-0.58 (1.11)	-0.75 (0.77)	-0.52 (0.98)	-0.57 (0.2)	-0.69 (0.11)	-0.54 (0.12)	0.12	0.59972	-0.03
1016	GPNMB	GPNMB	Q14956	216	EMIF-AD MBD	MRM	NA		-1	0	1			0 (1)	-0.14 (0.84)	0.27 (0.84)	0.25 (0.12)	-0.16 (0.11)	0.15 (0.08)	0.41	0.01465	0.1	0.51106	-0.31	0.0283	-0.31 (0.84)	-0.14 (0.65)	0.28 (0.99)	-0.13 (0.16)	-0.24 (0.2)	0.28 (0.24)	0.12	0.64829	-0.4	0.16078	-0.52	0.09383	0.21	0.1601		0.45 (0.73)	0.18 (0.84)	0.32 (0.87)	0.37 (0.23)	0.11 (0.11)	0.36 (0.12)	0.26	0.30412	0.01
1017	GPR158	GPR158	Q5T848	306	EMIF-AD MBD	MRM	NA		-1	1	1	Decrease	Decrease	0 (1)	-0.43 (0.93)	0.22 (0.69)	-0.03 (0.1)	-0.44 (0.1)	0.24 (0.07)	0.41	0.00354	-0.27	0.03277	-0.68	0	-0.09 (0.8)	-0.59 (0.89)	-0.89 (1.01)	-0.14 (0.13)	-0.59 (0.15)	-0.9 (0.18)	0.45	0.02596	0.76	0.00082	0.31	0.19904	-0.38	0.0045	Decrease linear	0.32 (0.75)	0.32 (0.64)	0.08 (0.71)	0.35 (0.16)	0.34 (0.09)	0.07 (0.1)	0.01	0.96913	0.28
1019	GPR37	GPR37	O15354	310	EMIF-AD MBD	MRM	NA		-1	1	1			0 (1)	-0.33 (0.89)	0.28 (0.77)	0 (0.1)	-0.34 (0.1)	0.28 (0.07)	0.33	0.01827	-0.29	0.02624	-0.62	0	-0.21 (0.87)	-0.35 (0.86)	-0.57 (0.97)	-0.25 (0.14)	-0.35 (0.17)	-0.57 (0.2)	0.1	0.65119	0.32	0.17876	0.23	0.3813	-0.16	0.2135		0.41 (0.8)	0.35 (0.77)	0.16 (0.76)	0.44 (0.18)	0.37 (0.1)	0.15 (0.1)	0.07	0.74391	0.28
1020	GPR37L1	GPR37L1	O60883	297	EMIF-AD MBD	MRM	NA		0	0	0	Decrease		0 (1)	0.01 (0.72)	0.09 (1.08)	0.08 (0.12)	0.01 (0.11)	0.04 (0.08)	0.07	0.67938	0.04	0.806	-0.03	0.8316	0.2 (0.67)	-0.14 (0.75)	-0.22 (0.72)	0.26 (0.16)	-0.14 (0.21)	-0.2 (0.24)	0.4	0.1281	0.46	0.11773	0.05	0.86847	-0.23	0.0295	Decrease linear	0.25 (0.51)	0.25 (0.65)	-0.15 (1.51)	0.22 (0.22)	0.21 (0.12)	-0.14 (0.13)	0.01	0.95788	0.36
1021	GPRC5B	GPRC5B	Q9NZH0	139	EMIF-AD MBD	MRM	NA		0	0	0			0 (1)	0.11 (1.18)	0.28 (0.85)	0.08 (0.17)	0.11 (0.17)	0.23 (0.13)	-0.03	0.89926	-0.15	0.5174	-0.12	0.58457	-0.02 (1.54)	0.37 (0.93)	-0.04 (0.56)	0.01 (0.26)	0.41 (0.29)	-0.02 (0.37)	-0.39	0.31347	0.04	0.93685	0.43	0.36426	0.03	0.9138		0.13 (1.31)	0.3 (0.77)	0.31 (0.81)	0.11 (0.35)	0.29 (0.17)	0.28 (0.21)	-0.18	0.63953	-0.17
1022	GPX3	GPX3	P22352	310	EMIF-AD MBD	MRM	NA		0	0	0			0 (1)	-0.02 (0.98)	-0.04 (0.98)	-0.07 (0.11)	-0.03 (0.11)	0 (0.08)	-0.04	0.79875	-0.07	0.62532	-0.03	0.82329	0.17 (0.89)	-0.09 (0.94)	-0.31 (1.17)	0.07 (0.16)	-0.08 (0.2)	-0.32 (0.23)	0.14	0.5734	0.39	0.17205	0.25	0.4225	-0.2	0.1638		-0.15 (0.88)	0.04 (0.94)	-0.08 (1.06)	-0.1 (0.21)	0.09 (0.12)	-0.09 (0.12)	-0.19	0.42216	-0.01
1024	GPX6	GPX6	P59796	167	EMIF-AD MBD	MRM	NA		0	0	0			0 (1)	0.14 (0.69)	0.13 (0.78)	0.01 (0.13)	0.13 (0.11)	0.13 (0.1)	-0.12	0.47122	-0.12	0.47304	0.01	0.97186	0.2 (0.7)	0.2 (0.68)	-0.07 (0.72)	0.16 (0.16)	0.21 (0.19)	-0.06 (0.23)	-0.05	0.84879	0.22	0.42169	0.27	0.37222	-0.11	0.3807		0.43 (0.81)	0.14 (0.77)	0.01 (0.78)	0.42 (0.23)	0.18 (0.14)	0 (0.13)	0.24	0.37276	0.43
1025	GRB2	GRB2	P62993	212	EMIF-AD MBD	MRM	NA		-1	0	1			0 (1)	-0.42 (0.83)	0.07 (1.02)	0.07 (0.14)	-0.41 (0.14)	0.02 (0.09)	0.48	0.01344	0.05	0.76854	-0.43	0.01032	-0.18 (0.85)	-0.63 (0.63)	-0.58 (0.95)	-0.14 (0.21)	-0.58 (0.24)	-0.57 (0.26)	0.44	0.1734	0.43	0.19949	-0.01	0.97527	-0.21	0.1539		-0.33 (1.32)	0.06 (0.95)	0.2 (0.98)	-0.3 (0.25)	0.01 (0.13)	0.21 (0.15)	-0.31	0.27652	-0.51
1027	GRIA2	GRIA2	P42262	277	EMIF-AD MBD	MRM	NA		-1	0	1	Decrease		0 (1)	-0.44 (1.03)	0.2 (0.96)	0.01 (0.12)	-0.46 (0.12)	0.2 (0.09)	0.46	0.00643	-0.2	0.20872	-0.66	1e-05	-0.09 (0.81)	-0.54 (1.09)	-0.94 (1.12)	-0.1 (0.18)	-0.53 (0.2)	-0.94 (0.23)	0.43	0.11207	0.84	0.00504	0.4	0.19101	-0.46	0.0032	Decrease linear	0.33 (0.91)	0.33 (0.95)	0 (0.96)	0.33 (0.22)	0.32 (0.13)	0.01 (0.13)	0.01	0.97231	0.32
1028	GRIA4	GRIA4	P48058	310	EMIF-AD MBD	MRM	NA		-1	1	1	Decrease	Decrease	0 (1)	-0.44 (0.86)	0.25 (0.75)	-0.06 (0.1)	-0.45 (0.1)	0.29 (0.07)	0.38	0.00524	-0.35	0.00534	-0.74	0	-0.2 (0.71)	-0.58 (0.78)	-0.75 (1.14)	-0.27 (0.13)	-0.58 (0.16)	-0.76 (0.19)	0.31	0.13692	0.49	0.03316	0.18	0.45765	-0.28	0.0264	Decrease linear	0.43 (0.91)	0.29 (0.74)	0.16 (0.7)	0.46 (0.17)	0.33 (0.1)	0.14 (0.1)	0.14	0.48213	0.32
1030	GRM4	GRM4	Q14833	249	ADNI	MRM	0		-1	0	1		Decrease	0 (0.88)	-0.58 (1.17)	0.26 (0.97)	-0.02 (0.15)	-0.6 (0.11)	0.26 (0.09)	0.59	0.00152	-0.28	0.10802	-0.87	0	-0.33 (1.15)	-0.62 (1.24)	-0.77 (1.03)	-0.32 (0.23)	-0.65 (0.16)	-0.79 (0.23)	0.33	0.24332	0.47	0.15039	0.14	0.61202	-0.21	0.243		0.5 (1.09)	0.41 (0.87)	-0.04 (1.04)	0.38 (0.3)	0.43 (0.13)	-0.02 (0.16)	-0.05	0.88181	0.4
1031	GRM4_EYPGSETPPK	GRM4	Q14833	249	ADNI	MRM	1		-1	0	1			0 (1)	-0.58 (1.59)	-0.05 (1.57)	-0.01 (0.21)	-0.58 (0.16)	-0.03 (0.14)	0.57	0.03434	0.02	0.93323	-0.54	0.01071	-0.62 (1.9)	-0.5 (1.41)	-0.72 (1.68)	-0.64 (0.35)	-0.49 (0.24)	-0.69 (0.35)	-0.15	0.72783	0.05	0.91738	0.2	0.63025	-0.03	0.8983		-0.15 (1.92)	0.12 (1.11)	-0.28 (2)	-0.21 (0.46)	0.16 (0.2)	-0.27 (0.25)	-0.37	0.45809	0.06
1032	GRN	GRN	P28799	711	ADNI	RBM	0		0	0	0			0 (1)	-0.02 (2.07)	0.15 (1.47)	0 (0.14)	-0.06 (0.1)	0.14 (0.09)	0.07	0.69011	-0.14	0.40346	-0.21	0.13686	-0.13 (1.82)	0 (2.44)	0.08 (1.31)	-0.11 (0.21)	-0.06 (0.16)	-0.02 (0.24)	-0.05	0.83609	-0.1	0.76412	-0.04	0.88428	0.04	0.8302		0.27 (1)	0.02 (1.34)	0.29 (1.72)	0.22 (0.32)	0.03 (0.14)	0.29 (0.16)	0.19	0.58866	-0.07
1033	GRN	GRN	P28799	291	EMIF-AD MBD	MRM	NA		0	0	0			0 (1)	0.15 (1.49)	0.32 (0.81)	0.03 (0.13)	0.15 (0.12)	0.3 (0.09)	-0.11	0.5323	-0.27	0.10404	-0.15	0.31789	0.44 (1.96)	-0.11 (0.88)	-0.07 (0.83)	0.46 (0.19)	-0.1 (0.22)	-0.08 (0.28)	0.57	0.05421	0.54	0.11074	-0.02	0.94565	-0.31	0.1878		0.24 (0.68)	0.36 (0.73)	0.3 (0.94)	0.24 (0.25)	0.34 (0.14)	0.3 (0.14)	-0.09	0.74324	-0.06
1034	GRP	GRP	P07492	99	EMIF-AD MBD	MRM	NA		0	0	0			0 (1)	0.17 (2.15)	0.22 (1.32)	-0.03 (0.31)	0.16 (0.33)	0.23 (0.2)	-0.19	0.68873	-0.25	0.50261	-0.07	0.85929	-0.71 (1.02)	1.04 (1.92)	0.35 (3.4)	-0.88 (0.57)	1.12 (0.6)	0.38 (0.7)	-2	0.02015	-1.27	0.16953	0.73	0.43453	0.65	0.3751		0.09 (1.31)	0.05 (1.36)	0.36 (1.32)	0.07 (0.79)	0.09 (0.34)	0.35 (0.3)	-0.02	0.98217	-0.28
1036	GSN	GSN	P06396	310	EMIF-AD MBD	MRM	NA		0	1	1			0 (1)	0.06 (0.91)	0.43 (0.78)	0.08 (0.1)	0.07 (0.1)	0.39 (0.07)	0	0.99035	-0.31	0.01623	-0.31	0.01073	-0.01 (0.94)	0.01 (0.83)	0.29 (0.97)	0.1 (0.14)	0 (0.16)	0.3 (0.19)	0.1	0.63636	-0.2	0.39803	-0.3	0.23624	0.1	0.4699		0.57 (0.81)	0.46 (0.78)	0.36 (0.78)	0.51 (0.18)	0.41 (0.1)	0.38 (0.1)	0.11	0.59934	0.14
1038	GSS	GSS	P48637	302	EMIF-AD MBD	MRM	NA		-1	1	1		Decrease	0 (1)	-0.33 (0.91)	0.56 (0.89)	-0.01 (0.11)	-0.33 (0.11)	0.56 (0.08)	0.32	0.0346	-0.57	6e-05	-0.9	0	-0.3 (1.05)	-0.21 (0.72)	-0.57 (0.87)	-0.33 (0.16)	-0.21 (0.18)	-0.58 (0.23)	-0.13	0.60173	0.25	0.36795	0.37	0.20157	-0.11	0.4157		0.86 (0.96)	0.58 (0.77)	0.43 (0.99)	0.87 (0.2)	0.6 (0.11)	0.42 (0.12)	0.28	0.2203	0.46
1044	GSTO1	GSTO1	P78417	292	EMIF-AD MBD	MRM	NA		-1	0	1			0 (1)	-0.28 (0.7)	0.18 (0.7)	0.05 (0.1)	-0.29 (0.09)	0.15 (0.07)	0.34	0.00951	-0.1	0.42692	-0.44	0.00012	-0.2 (0.6)	-0.22 (0.68)	-0.55 (0.89)	-0.16 (0.12)	-0.23 (0.14)	-0.53 (0.17)	0.07	0.70859	0.37	0.06949	0.31	0.16692	-0.18	0.0728		0.27 (0.85)	0.14 (0.69)	0.19 (0.67)	0.26 (0.16)	0.1 (0.09)	0.21 (0.09)	0.16	0.35853	0.05
1045	GSTP1	GSTP1	P09211	298	EMIF-AD MBD	MRM	NA		0	0	1			0 (1)	-0.03 (0.82)	0.37 (1.15)	0.1 (0.12)	-0.04 (0.12)	0.31 (0.09)	0.15	0.39178	-0.21	0.17657	-0.35	0.01831	0.1 (0.78)	-0.06 (0.67)	-0.24 (1.04)	0.15 (0.19)	-0.04 (0.21)	-0.21 (0.25)	0.2	0.49403	0.36	0.25054	0.16	0.62015	-0.22	0.0738		0.53 (1.52)	0.26 (0.98)	0.43 (1.19)	0.5 (0.23)	0.2 (0.13)	0.46 (0.13)	0.3	0.25588	0.04
1051	GZMH	GZMH	P20718	276	EMIF-AD MBD	MRM	NA		0	0	0	Increase		0 (1)	-0.21 (1.06)	-0.11 (0.97)	-0.07 (0.12)	-0.22 (0.12)	-0.07 (0.09)	0.15	0.38665	0	0.99121	-0.15	0.31892	-0.44 (1.22)	-0.21 (0.99)	0.2 (0.64)	-0.51 (0.18)	-0.21 (0.21)	0.2 (0.25)	-0.31	0.27225	-0.71	0.02109	-0.4	0.2128	0.34	0.0369	Increase linear	-0.39 (1.1)	-0.09 (0.78)	-0.02 (1.09)	-0.37 (0.23)	-0.04 (0.13)	-0.04 (0.13)	-0.33	0.21311	-0.33
1059	HABP2	HABP2	Q14520	310	EMIF-AD MBD	MRM	NA		0	0	2	Increase		0 (1)	0.11 (0.89)	-0.27 (0.96)	-0.05 (0.11)	0.11 (0.11)	-0.24 (0.08)	-0.16	0.2926	0.19	0.18067	0.35	0.00905	-0.23 (0.83)	0.37 (0.84)	0.45 (0.86)	-0.25 (0.16)	0.37 (0.19)	0.43 (0.22)	-0.62	0.01142	-0.68	0.01208	-0.06	0.82963	0.35	0.006	Increase linear	-0.39 (1.17)	-0.38 (0.85)	-0.11 (0.99)	-0.39 (0.2)	-0.35 (0.11)	-0.12 (0.12)	-0.04	0.8514	-0.27
1062	HAPLN2	HAPLN2	Q9GZV7	112	EMIF-AD MBD	MRM	NA		0	0	0			0 (1)	-0.08 (0.8)	-0.19 (0.88)	-0.07 (0.18)	-0.09 (0.19)	-0.15 (0.12)	0.02	0.95105	0.08	0.7225	0.06	0.77426	-0.58 (0.73)	0.27 (0.75)	0.03 (0.74)	-0.72 (0.3)	0.22 (0.26)	0.02 (0.38)	-0.94	0.02108	-0.74	0.12708	0.2	0.66686	0.42	0.078		0 (1.1)	-0.19 (0.79)	-0.23 (0.92)	0.08 (0.32)	-0.11 (0.17)	-0.27 (0.16)	0.19	0.59308	0.35
1063	HAPLN4	HAPLN4	Q86UW8	237	EMIF-AD MBD	MRM	NA		0	0	0			0 (1)	-0.15 (0.73)	0.04 (1.05)	-0.03 (0.13)	-0.15 (0.13)	0.06 (0.09)	0.12	0.52369	-0.09	0.5983	-0.21	0.18739	-0.06 (0.63)	-0.18 (0.84)	-0.34 (0.83)	-0.06 (0.18)	-0.21 (0.23)	-0.34 (0.29)	0.14	0.62539	0.28	0.40513	0.14	0.71116	-0.14	0.282		-0.19 (1.27)	0.2 (1.08)	-0.07 (0.93)	-0.21 (0.25)	0.22 (0.13)	-0.07 (0.14)	-0.43	0.12243	-0.14
1064	HAVCR2	HAVCR2	Q8TDQ0	254	EMIF-AD MBD	MRM	NA		0	0	1			0 (1)	-0.13 (0.89)	0.29 (0.74)	0.01 (0.11)	-0.13 (0.1)	0.28 (0.08)	0.13	0.37993	-0.27	0.05901	-0.4	0.00235	-0.12 (0.89)	-0.46 (0.84)	0.27 (0.82)	-0.13 (0.14)	-0.46 (0.18)	0.27 (0.2)	0.33	0.16222	-0.4	0.10696	-0.73	0.00822	0.17	0.2406		0.27 (0.77)	0.31 (0.63)	0.27 (0.85)	0.27 (0.2)	0.31 (0.11)	0.27 (0.11)	-0.04	0.8498	0
1065	HBA1	HBA1	P69907	249	ADNI	MRM	1		0	0	0			0 (0.98)	-0.13 (0.89)	-0.1 (0.86)	0 (0.13)	-0.11 (0.1)	-0.1 (0.08)	0.11	0.48182	0.1	0.53571	-0.02	0.88298	-0.36 (0.71)	0.05 (1.06)	-0.26 (0.58)	-0.36 (0.2)	0.06 (0.14)	-0.25 (0.19)	-0.42	0.07915	-0.11	0.68235	0.31	0.18468	0.07	0.6088		0.12 (0.97)	-0.25 (0.72)	0.05 (1)	0.12 (0.25)	-0.24 (0.11)	0.05 (0.14)	0.36	0.20136	0.07
1066	HBA1	HBA1	P69905	310	EMIF-AD MBD	MRM	NA		0	0	0	Decrease	Decrease	0 (1)	-0.02 (1.04)	-0.09 (0.91)	0.09 (0.11)	-0.02 (0.11)	-0.14 (0.08)	0.11	0.4889	0.23	0.10708	0.12	0.36243	0 (1.02)	0.32 (1.16)	-0.57 (0.66)	0.08 (0.16)	0.31 (0.19)	-0.55 (0.22)	-0.23	0.3391	0.63	0.02152	0.86	0.00337	-0.25	0.0977	Decrease non-linear	0.38 (0.79)	0.02 (1.05)	-0.37 (0.67)	0.35 (0.2)	-0.03 (0.11)	-0.35 (0.12)	0.38	0.09476	0.7
1067	HBB	HBB	P68871	249	ADNI	MRM	1		0	0	0			0 (0.97)	-0.07 (0.87)	-0.06 (0.84)	0 (0.13)	-0.06 (0.1)	-0.06 (0.08)	0.06	0.72199	0.06	0.70445	0	0.99673	-0.23 (0.71)	0.06 (1.03)	-0.16 (0.59)	-0.24 (0.19)	0.06 (0.13)	-0.16 (0.19)	-0.3	0.20485	-0.08	0.77829	0.22	0.33052	0.05	0.7202		0.16 (0.91)	-0.18 (0.68)	0.06 (1.03)	0.15 (0.25)	-0.18 (0.11)	0.06 (0.13)	0.33	0.23162	0.09
1068	HBB	HBB	P68871	310	EMIF-AD MBD	MRM	NA		0	0	0	Decrease	Decrease	0 (1)	-0.01 (1.06)	-0.11 (0.93)	0.09 (0.11)	0 (0.11)	-0.17 (0.08)	0.1	0.5376	0.26	0.07448	0.16	0.23798	0.01 (1.01)	0.38 (1.24)	-0.6 (0.59)	0.08 (0.16)	0.37 (0.19)	-0.58 (0.23)	-0.3	0.23461	0.66	0.01836	0.95	0.00149	-0.25	0.1067	Decrease non-linear	0.36 (0.81)	0.02 (1.06)	-0.42 (0.7)	0.33 (0.2)	-0.02 (0.12)	-0.41 (0.12)	0.35	0.1319	0.73
1069	HBB_elisa	HBB	P68871	304	ADNI	ELISA	0		0	0	0			0 (1)	-0.02 (0.66)	-0.1 (0.46)	0 (0.09)	-0.04 (0.06)	-0.1 (0.06)	0.03	0.74995	0.1	0.32787	0.07	0.4229	-0.11 (0.53)	0.06 (0.76)	-0.1 (0.56)	-0.11 (0.11)	0.04 (0.08)	-0.12 (0.11)	-0.15	0.25669	0.02	0.90971	0.17	0.20073	-0.01	0.8966		-0.1 (0.27)	-0.12 (0.51)	-0.07 (0.42)	-0.13 (0.16)	-0.13 (0.07)	-0.07 (0.08)	0	0.9963	-0.06
1070	HBD	HBD	P02042	310	EMIF-AD MBD	MRM	NA		0	0	0	Decrease	Decrease	0 (1)	-0.01 (1.03)	-0.08 (0.9)	0.09 (0.11)	0 (0.11)	-0.13 (0.08)	0.1	0.53247	0.23	0.11517	0.13	0.34201	-0.01 (1)	0.35 (1.21)	-0.51 (0.55)	0.07 (0.16)	0.34 (0.19)	-0.5 (0.22)	-0.28	0.25808	0.56	0.03845	0.84	0.00417	-0.21	0.1572	Decrease non-linear	0.26 (0.87)	0.05 (1.01)	-0.32 (0.69)	0.23 (0.2)	0 (0.11)	-0.31 (0.12)	0.22	0.32701	0.53
1072	HBEGF	HBEGF	Q99075	270	ADNI	RBM	0		0	1	1	Decrease		0 (1)	-0.24 (0.8)	0.44 (0.75)	-0.01 (0.11)	-0.27 (0.08)	0.44 (0.07)	0.26	0.06409	-0.45	0.00088	-0.71	0	-0.11 (0.78)	-0.14 (0.81)	-0.56 (0.71)	-0.1 (0.16)	-0.19 (0.11)	-0.6 (0.16)	0.09	0.64238	0.5	0.02721	0.41	0.03051	-0.24	0.0381	Decrease linear	0.89 (0.6)	0.45 (0.71)	0.3 (0.82)	0.79 (0.22)	0.45 (0.09)	0.32 (0.12)	0.34	0.14766	0.47
1077	HBZ	HBZ	P02008	291	EMIF-AD MBD	MRM	NA		0	-1	0	Decrease	Decrease	0 (1)	-0.11 (1.11)	-0.12 (0.96)	0.12 (0.12)	-0.11 (0.12)	-0.19 (0.09)	0.23	0.18105	0.31	0.04623	0.08	0.56685	-0.08 (1.09)	0.28 (1.18)	-0.74 (0.74)	0.01 (0.17)	0.26 (0.2)	-0.7 (0.24)	-0.26	0.32804	0.71	0.0156	0.97	0.00219	-0.27	0.1021	Decrease non-linear	0.42 (0.75)	0.03 (1.1)	-0.45 (0.75)	0.39 (0.21)	-0.03 (0.12)	-0.43 (0.12)	0.42	0.08859	0.82
1078	HDHD2	HDHD2	Q9H0R4	185	EMIF-AD MBD	MRM	NA		0	1	1	Decrease		0 (1)	-0.38 (1.32)	0.31 (0.99)	-0.11 (0.16)	-0.39 (0.17)	0.37 (0.11)	0.28	0.22919	-0.48	0.02308	-0.76	0.00029	0.12 (1.29)	-0.84 (0.59)	-0.97 (1.72)	-0.01 (0.25)	-0.79 (0.32)	-0.98 (0.38)	0.78	0.06315	0.96	0.03451	0.19	0.70473	-0.48	0.0783	Decrease non-linear	0.22 (1.18)	0.3 (0.93)	0.34 (1.03)	0.25 (0.32)	0.35 (0.15)	0.32 (0.18)	-0.1	0.77612	-0.08
1079	HEG1	HEG1	Q9ULI3	303	EMIF-AD MBD	MRM	NA		-1	1	1		Decrease	0 (1)	-0.32 (0.78)	0.3 (0.88)	0 (0.1)	-0.33 (0.1)	0.31 (0.08)	0.32	0.0262	-0.31	0.02167	-0.63	0	-0.21 (0.65)	-0.31 (0.76)	-0.59 (1.04)	-0.25 (0.14)	-0.31 (0.17)	-0.58 (0.21)	0.06	0.78711	0.33	0.18617	0.27	0.30876	-0.16	0.1728		0.43 (0.93)	0.44 (0.72)	0.11 (0.99)	0.45 (0.19)	0.45 (0.1)	0.11 (0.11)	0	0.99625	0.34
1080	HEPACAM	HEPACAM	Q14CZ8	202	EMIF-AD MBD	MRM	NA		0	1	1			0 (1)	-0.07 (0.95)	0.56 (0.78)	0.09 (0.12)	-0.08 (0.13)	0.51 (0.09)	0.17	0.33059	-0.42	0.0085	-0.59	0.0002	-0.05 (0.91)	0.01 (0.93)	-0.18 (1.07)	0.01 (0.2)	-0.01 (0.2)	-0.17 (0.22)	0.02	0.95806	0.18	0.54839	0.17	0.58777	-0.07	0.6897		0.62 (0.85)	0.74 (0.64)	0.4 (0.85)	0.6 (0.24)	0.71 (0.14)	0.41 (0.13)	-0.11	0.69896	0.19
1082	HEXA	HEXA	P06865	310	EMIF-AD MBD	MRM	NA		0	0	0			0 (1)	0.04 (0.95)	0 (0.72)	-0.08 (0.1)	0.03 (0.1)	0.04 (0.07)	-0.11	0.43315	-0.12	0.33319	-0.01	0.90203	0.16 (1.02)	-0.08 (0.72)	-0.06 (1.09)	0.06 (0.14)	-0.07 (0.16)	-0.08 (0.19)	0.13	0.53819	0.14	0.55072	0.01	0.96894	-0.08	0.552		0.06 (0.9)	-0.09 (0.73)	0.07 (0.65)	0.11 (0.17)	-0.04 (0.1)	0.06 (0.1)	0.14	0.47237	0.05
1083	HEXB	HEXB	P07686	310	EMIF-AD MBD	MRM	NA		0	0	0			0 (1)	-0.01 (0.99)	-0.05 (0.91)	-0.11 (0.11)	-0.02 (0.11)	0.01 (0.08)	-0.09	0.55505	-0.13	0.36393	-0.04	0.7778	0.28 (1.13)	-0.26 (0.81)	-0.27 (0.79)	0.15 (0.16)	-0.25 (0.19)	-0.29 (0.22)	0.4	0.09849	0.44	0.10177	0.04	0.89083	-0.25	0.0777		0.03 (1.03)	-0.11 (0.87)	-0.02 (0.92)	0.09 (0.2)	-0.04 (0.11)	-0.04 (0.12)	0.12	0.5833	0.13
1084	HFE2	HFE2	Q6ZVN8	179	EMIF-AD MBD	MRM	NA		-1	1	1	Decrease		0 (1)	-0.54 (0.99)	0.28 (0.73)	-0.07 (0.14)	-0.56 (0.13)	0.34 (0.11)	0.49	0.00784	-0.41	0.02592	-0.9	0	-0.25 (0.83)	-0.6 (0.86)	-1.02 (1.28)	-0.33 (0.18)	-0.6 (0.21)	-1.06 (0.24)	0.27	0.33285	0.74	0.014	0.46	0.15347	-0.35	0.0422	Decrease linear	0.29 (0.73)	0.39 (0.62)	0.16 (0.83)	0.33 (0.22)	0.43 (0.14)	0.17 (0.15)	-0.1	0.70208	0.16
1085	HGF	HGF	P14210	270	ADNI	RBM	0		0	1	1			0 (1)	0.21 (1.01)	1.03 (0.99)	-0.01 (0.14)	0.18 (0.1)	1.03 (0.09)	-0.2	0.25028	-1.04	0	-0.84	0	0.05 (0.84)	0.25 (1.16)	0.28 (0.84)	0.07 (0.21)	0.18 (0.14)	0.23 (0.21)	-0.12	0.64866	-0.16	0.58113	-0.05	0.84987	0.11	0.4736		1.2 (0.69)	1.08 (1)	0.91 (1.03)	1.05 (0.29)	1.07 (0.12)	0.93 (0.15)	-0.02	0.94952	0.12
1086	HGFAC	HGFAC	Q04756	310	EMIF-AD MBD	MRM	NA		0	0	2		Increase	0 (1)	0.16 (1.1)	-0.12 (0.82)	-0.03 (0.11)	0.16 (0.11)	-0.11 (0.08)	-0.2	0.19092	0.07	0.61599	0.27	0.04277	0.08 (0.93)	0.06 (1.29)	0.46 (1.17)	0.07 (0.16)	0.06 (0.19)	0.45 (0.22)	0.01	0.97111	-0.38	0.1609	-0.39	0.18087	0.14	0.3859		-0.49 (1.04)	-0.1 (0.6)	-0.02 (0.91)	-0.5 (0.2)	-0.08 (0.11)	-0.03 (0.12)	-0.42	0.06415	-0.47
1107	HIST1H2BK	HIST1H2BK	O60814	102	EMIF-AD MBD	MRM	NA		0	0	0			0 (1)	-0.37 (0.46)	-0.28 (0.67)	0.01 (0.14)	-0.37 (0.15)	-0.29 (0.12)	0.38	0.06279	0.3	0.12358	-0.09	0.66297	-0.51 (0.37)	-0.1 (0.66)	-0.42 (0.27)	-0.47 (0.19)	-0.09 (0.22)	-0.4 (0.22)	-0.38	0.19245	-0.07	0.81348	0.31	0.33089	0.09	0.4743		-0.53 (0.56)	-0.02 (0.79)	-0.48 (0.46)	-0.53 (0.26)	-0.06 (0.15)	-0.46 (0.13)	-0.46	0.12741	-0.06
1123	HK1	HK1	P19367	137	EMIF-AD MBD	MRM	NA		0	1	1			0 (1)	0.1 (0.77)	0.56 (0.98)	0.03 (0.16)	0.09 (0.15)	0.55 (0.12)	-0.06	0.77001	-0.52	0.01638	-0.46	0.01933	0.16 (0.72)	0.21 (0.79)	-0.21 (0.87)	0.19 (0.23)	0.22 (0.25)	-0.2 (0.32)	-0.03	0.92972	0.39	0.3268	0.42	0.30441	-0.21	0.2251		0.92 (1.52)	0.4 (0.9)	0.67 (0.85)	0.89 (0.32)	0.4 (0.16)	0.66 (0.19)	0.49	0.17156	0.23
1133	HLA-A.P16189	HLA-A.P16189	P16189	289	EMIF-AD MBD	MRM	NA		0	0	0			0 (1)	0.11 (1.29)	0.23 (1.26)	0.01 (0.15)	0.11 (0.14)	0.22 (0.11)	-0.1	0.62806	-0.21	0.26374	-0.11	0.52355	-0.17 (1.35)	0.24 (1.2)	0.58 (1.2)	-0.2 (0.22)	0.25 (0.26)	0.56 (0.34)	-0.44	0.19687	-0.76	0.06219	-0.32	0.46181	0.37	0.0672		0.14 (1.1)	0.34 (1.38)	0.13 (1.18)	0.16 (0.28)	0.36 (0.16)	0.13 (0.17)	-0.2	0.53488	0.03
1135	HLA-A.P18462	HLA-A.P18462	HLA-A.P18462	264	EMIF-AD MBD	MRM	NA		0	0	0			0 (1)	0.15 (1.25)	0.3 (1.08)	0.01 (0.14)	0.14 (0.14)	0.3 (0.1)	-0.14	0.49288	-0.29	0.10631	-0.16	0.35794	-0.13 (1.35)	0.38 (1.09)	0.4 (1.25)	-0.17 (0.22)	0.38 (0.24)	0.38 (0.33)	-0.55	0.09044	-0.55	0.16702	0	0.9945	0.31	0.1458		0.21 (1.02)	0.39 (1.13)	0.23 (1.06)	0.22 (0.26)	0.41 (0.15)	0.23 (0.16)	-0.18	0.53574	-0.01
1141	HLA-A.P30456	HLA-A.P30456	HLA-A.P30456	264	EMIF-AD MBD	MRM	NA		0	0	0			0 (1)	0.16 (1.27)	0.29 (1.12)	0.01 (0.14)	0.15 (0.14)	0.29 (0.1)	-0.14	0.48814	-0.28	0.13377	-0.14	0.43098	-0.13 (1.36)	0.4 (1.11)	0.41 (1.29)	-0.16 (0.22)	0.4 (0.24)	0.39 (0.34)	-0.56	0.09248	-0.55	0.17699	0.01	0.97665	0.31	0.1465		0.19 (1.05)	0.39 (1.19)	0.22 (1.06)	0.2 (0.26)	0.41 (0.15)	0.22 (0.17)	-0.2	0.50154	-0.02
1145	HLA-A.Q09160	HLA-A.Q09160	HLA-A.Q09160	276	EMIF-AD MBD	MRM	NA		0	0	0			0 (1)	-0.02 (1.16)	0.16 (1.01)	0.03 (0.13)	-0.02 (0.12)	0.15 (0.09)	0.04	0.80366	-0.12	0.46386	-0.17	0.27982	0.16 (1.07)	-0.28 (1.39)	-0.03 (0.98)	0.14 (0.19)	-0.27 (0.22)	-0.02 (0.26)	0.41	0.15824	0.16	0.62339	-0.25	0.45992	-0.12	0.504		0.27 (1.08)	0.43 (1.01)	-0.2 (0.9)	0.28 (0.25)	0.43 (0.13)	-0.2 (0.14)	-0.15	0.5894	0.48
1182	HLA-C.P04222	HLA-C.P04222	HLA-C.P04222	305	EMIF-AD MBD	MRM	NA		0	0	0			0 (1)	-0.04 (1.26)	0.24 (1.16)	0.04 (0.14)	-0.05 (0.13)	0.22 (0.1)	0.09	0.63986	-0.17	0.31884	-0.26	0.11107	0.13 (1.11)	-0.25 (1.46)	-0.11 (1.29)	0.12 (0.2)	-0.25 (0.24)	-0.1 (0.28)	0.37	0.23941	0.23	0.51339	-0.14	0.70064	-0.16	0.4025		0.37 (1.03)	0.54 (1.2)	-0.15 (1.06)	0.38 (0.26)	0.53 (0.15)	-0.14 (0.15)	-0.15	0.60613	0.53
1183	HLA-C.P10321	HLA-C.P10321	HLA-C.P10321	310	EMIF-AD MBD	MRM	NA		0	0	0			0 (1)	0.02 (1.16)	0.22 (1.05)	0.04 (0.12)	0.01 (0.12)	0.21 (0.09)	0.02	0.88901	-0.17	0.2882	-0.19	0.20007	0.16 (0.98)	-0.15 (1.4)	-0.07 (1.13)	0.15 (0.18)	-0.14 (0.22)	-0.06 (0.26)	0.29	0.30579	0.21	0.51463	-0.09	0.79952	-0.13	0.4517		0.22 (1.02)	0.45 (1.05)	-0.02 (1.02)	0.23 (0.24)	0.45 (0.13)	-0.02 (0.14)	-0.22	0.42315	0.25
1184	HLA-C.P30499	HLA-C.P30499	HLA-C.P30499	310	EMIF-AD MBD	MRM	NA		0	0	0			0 (1)	0.01 (1.11)	0.24 (1.03)	0.04 (0.12)	0 (0.12)	0.22 (0.09)	0.04	0.83485	-0.18	0.26173	-0.21	0.15456	0.19 (0.96)	-0.2 (1.3)	-0.08 (1.1)	0.19 (0.18)	-0.2 (0.21)	-0.07 (0.25)	0.39	0.16517	0.26	0.39829	-0.13	0.70325	-0.17	0.3077		0.28 (0.96)	0.46 (1.05)	-0.03 (0.98)	0.29 (0.23)	0.45 (0.13)	-0.03 (0.13)	-0.16	0.53033	0.31
1185	HLA-C.P30501	HLA-C.P30501	HLA-C.P30501	305	EMIF-AD MBD	MRM	NA		0	0	0		Decrease	0 (1)	-0.01 (1.29)	0.2 (1.14)	0.03 (0.14)	-0.02 (0.13)	0.19 (0.1)	0.05	0.79384	-0.15	0.37197	-0.2	0.21244	0.12 (1.12)	-0.14 (1.54)	-0.09 (1.26)	0.08 (0.2)	-0.14 (0.24)	-0.09 (0.28)	0.22	0.47658	0.17	0.62115	-0.05	0.88907	-0.11	0.5631		0.27 (1.08)	0.49 (1.14)	-0.14 (1.07)	0.29 (0.26)	0.5 (0.14)	-0.15 (0.15)	-0.21	0.48273	0.44
1187	HLA-C.P30505	HLA-C.P30505	HLA-C.P30505	288	EMIF-AD MBD	MRM	NA		0	0	0		Decrease	0 (1)	-0.01 (1.16)	0.13 (1.02)	0.04 (0.13)	0 (0.12)	0.11 (0.09)	0.04	0.82437	-0.08	0.64424	-0.12	0.45242	0.12 (1.02)	-0.22 (1.38)	0.03 (1.12)	0.1 (0.19)	-0.21 (0.22)	0.04 (0.26)	0.31	0.28223	0.06	0.85487	-0.25	0.46287	-0.05	0.7616		0.21 (1.01)	0.41 (1.01)	-0.22 (0.93)	0.24 (0.23)	0.41 (0.13)	-0.22 (0.14)	-0.17	0.52215	0.46
1189	HLA-C.Q07000	HLA-C.Q07000	HLA-C.Q07000	305	EMIF-AD MBD	MRM	NA		0	0	0		Decrease	0 (1)	-0.04 (1.26)	0.22 (1.13)	0.04 (0.13)	-0.04 (0.13)	0.2 (0.1)	0.08	0.66004	-0.15	0.37037	-0.23	0.14581	0.09 (1.1)	-0.18 (1.46)	-0.09 (1.29)	0.08 (0.2)	-0.18 (0.24)	-0.08 (0.28)	0.26	0.40616	0.16	0.64882	-0.1	0.78201	-0.1	0.5819		0.27 (1.07)	0.51 (1.13)	-0.13 (1.07)	0.29 (0.25)	0.51 (0.14)	-0.13 (0.15)	-0.22	0.45011	0.41
1190	HLA-C.Q29865	HLA-C.Q29865	HLA-C.Q29865	310	EMIF-AD MBD	MRM	NA		0	0	0		Decrease	0 (1)	-0.05 (1.25)	0.21 (1.13)	0.04 (0.13)	-0.05 (0.13)	0.19 (0.09)	0.1	0.59917	-0.15	0.37091	-0.25	0.1221	0.13 (1.05)	-0.27 (1.46)	-0.12 (1.32)	0.12 (0.2)	-0.27 (0.24)	-0.11 (0.28)	0.39	0.21024	0.24	0.49049	-0.15	0.68052	-0.16	0.3975		0.27 (1.01)	0.48 (1.16)	-0.09 (1.09)	0.28 (0.25)	0.47 (0.14)	-0.09 (0.15)	-0.19	0.50789	0.36
1192	HLA-C.Q29963	HLA-C.Q29963	HLA-C.Q29963	310	EMIF-AD MBD	MRM	NA		0	0	0			0 (1)	-0.03 (1.26)	0.2 (1.12)	0.04 (0.13)	-0.03 (0.13)	0.18 (0.09)	0.07	0.70513	-0.15	0.38679	-0.22	0.17797	0.11 (1.04)	-0.19 (1.53)	-0.09 (1.3)	0.09 (0.2)	-0.19 (0.24)	-0.08 (0.28)	0.28	0.35892	0.18	0.60676	-0.11	0.7704	-0.11	0.5463		0.2 (1.04)	0.46 (1.12)	-0.08 (1.1)	0.22 (0.25)	0.46 (0.14)	-0.08 (0.15)	-0.24	0.4031	0.3
1194	HLA-C.Q9TNN7	HLA-C.Q9TNN7	HLA-C.Q9TNN7	288	EMIF-AD MBD	MRM	NA		0	0	0		Decrease	0 (1)	0 (1.17)	0.14 (1.03)	0.04 (0.13)	0 (0.12)	0.12 (0.09)	0.04	0.82865	-0.08	0.62628	-0.12	0.44006	0.12 (1.03)	-0.22 (1.38)	0.04 (1.14)	0.1 (0.19)	-0.21 (0.22)	0.05 (0.26)	0.31	0.28357	0.05	0.87575	-0.26	0.44937	-0.05	0.7723		0.22 (1.01)	0.42 (1.03)	-0.22 (0.92)	0.25 (0.24)	0.42 (0.13)	-0.22 (0.14)	-0.17	0.52539	0.47
1198	HLA-DRA	HLA-DRA	P01903	214	EMIF-AD MBD	MRM	NA		0	0	0			0 (1)	0.31 (0.88)	0.17 (1.02)	0.04 (0.14)	0.31 (0.15)	0.15 (0.1)	-0.27	0.18468	-0.11	0.52864	0.16	0.37319	0.4 (0.78)	-0.02 (0.65)	0.48 (1.16)	0.43 (0.23)	-0.01 (0.29)	0.48 (0.29)	0.44	0.24168	-0.06	0.88004	-0.49	0.22504	0	0.9892		0.35 (1.18)	0.06 (0.94)	0.27 (1.07)	0.34 (0.25)	0.04 (0.13)	0.28 (0.16)	0.3	0.28679	0.06
1199	HLA-DRB1	HLA-DRB1	P01911	95	EMIF-AD MBD	MRM	NA		0	0	0			0 (1)	0.17 (1.22)	-0.24 (0.86)	0 (0.2)	0.17 (0.21)	-0.24 (0.15)	-0.17	0.55482	0.24	0.36122	0.41	0.12157	0.03 (0.72)	0.48 (1.78)	0.11 (1.31)	-0.05 (0.37)	0.47 (0.42)	0.12 (0.36)	-0.52	0.34573	-0.17	0.74109	0.35	0.52975	-0.03	0.9412		0.07 (0.43)	-0.31 (0.86)	-0.25 (0.93)	0.08 (0.46)	-0.28 (0.25)	-0.25 (0.22)	0.36	0.49363	0.32
1214	HLA-G	HLA-G	P17693	281	EMIF-AD MBD	MRM	NA		0	0	0		Decrease	0 (1)	0.07 (1.05)	0.21 (0.96)	0.02 (0.12)	0.07 (0.12)	0.21 (0.09)	-0.05	0.7782	-0.19	0.23756	-0.14	0.34035	0.24 (0.96)	-0.16 (1.25)	0.03 (0.94)	0.23 (0.17)	-0.15 (0.2)	0.05 (0.24)	0.38	0.1555	0.18	0.53671	-0.19	0.53625	-0.13	0.4053		0.39 (0.91)	0.48 (1.03)	-0.16 (0.77)	0.41 (0.22)	0.47 (0.13)	-0.15 (0.13)	-0.06	0.8059	0.57
1215	HLA-H	HLA-H	P01893	306	EMIF-AD MBD	MRM	NA		0	0	0			0 (1)	-0.02 (1.2)	0.17 (1.03)	0.02 (0.12)	-0.03 (0.12)	0.16 (0.09)	0.05	0.77089	-0.14	0.36907	-0.19	0.20337	0.14 (1.12)	-0.2 (1.35)	-0.12 (1.18)	0.12 (0.18)	-0.19 (0.22)	-0.12 (0.26)	0.3	0.29213	0.23	0.46155	-0.07	0.83433	-0.14	0.4225		0.2 (0.94)	0.47 (1.01)	-0.16 (0.99)	0.22 (0.23)	0.47 (0.13)	-0.16 (0.14)	-0.25	0.34803	0.37
1222	HP	HP	P00738	310	EMIF-AD MBD	MRM	NA		0	0	0			0 (1)	0.01 (1.06)	-0.11 (0.94)	-0.04 (0.12)	0.01 (0.11)	-0.09 (0.08)	-0.05	0.76291	0.05	0.75863	0.09	0.5025	-0.08 (1.02)	-0.02 (1.14)	0.22 (1.06)	-0.1 (0.17)	-0.02 (0.2)	0.21 (0.24)	-0.08	0.75885	-0.31	0.29257	-0.23	0.46897	0.11	0.4789		-0.13 (0.9)	-0.19 (0.94)	-0.02 (0.97)	-0.13 (0.22)	-0.17 (0.12)	-0.02 (0.13)	0.04	0.86045	-0.1
1225	HPR	HPR	P00739	241	EMIF-AD MBD	MRM	NA		0	0	0			0 (1)	0.04 (1)	-0.15 (0.82)	-0.05 (0.12)	0.04 (0.12)	-0.13 (0.09)	-0.08	0.63098	0.09	0.57995	0.17	0.24629	0.01 (1.28)	-0.16 (0.7)	0.38 (0.57)	-0.05 (0.17)	-0.15 (0.2)	0.36 (0.24)	0.1	0.71353	-0.41	0.1701	-0.51	0.11284	0.16	0.3448		-0.32 (0.76)	-0.11 (0.82)	-0.14 (0.85)	-0.28 (0.22)	-0.08 (0.13)	-0.16 (0.12)	-0.2	0.43719	-0.11
1226	HPRT1	HPRT1	P00492	297	EMIF-AD MBD	MRM	NA		-1	1	1	Decrease		0 (1)	-0.37 (0.99)	0.92 (0.92)	-0.03 (0.12)	-0.38 (0.11)	0.94 (0.08)	0.34	0.03161	-0.98	0	-1.32	0	-0.21 (0.86)	-0.29 (0.94)	-0.83 (1.21)	-0.25 (0.16)	-0.29 (0.2)	-0.83 (0.23)	0.04	0.87023	0.59	0.04012	0.54	0.07652	-0.29	0.0469	Decrease linear	0.95 (1.05)	0.88 (0.79)	0.96 (1.01)	0.96 (0.21)	0.9 (0.12)	0.95 (0.12)	0.07	0.78011	0.01
1227	HPX	HPX	P02790	249	ADNI	MRM	1	2	0	0	0			0 (0.99)	-0.06 (0.97)	0.01 (0.85)	-0.03 (0.12)	-0.13 (0.09)	0 (0.08)	0.1	0.52815	-0.03	0.81619	-0.13	0.28587	-0.32 (0.8)	-0.05 (1.02)	0.16 (1.01)	-0.28 (0.19)	-0.15 (0.13)	0.06 (0.18)	-0.13	0.58275	-0.34	0.19716	-0.21	0.33383	0.2	0.1841		0.35 (0.58)	-0.09 (0.83)	0.08 (0.93)	0.12 (0.24)	-0.1 (0.11)	0.11 (0.13)	0.22	0.41675	0.01
1228	HPX	HPX	P02790	310	EMIF-AD MBD	MRM	NA	1	1	0	2	Increase		0 (1)	0.42 (1.02)	-0.32 (1.03)	-0.03 (0.12)	0.43 (0.12)	-0.31 (0.09)	-0.46	0.00617	0.28	0.06683	0.74	0	0.1 (0.93)	0.69 (0.96)	0.72 (1.15)	0.1 (0.17)	0.69 (0.21)	0.71 (0.25)	-0.59	0.02961	-0.61	0.04291	-0.02	0.95351	0.35	0.0197	Increase linear	-0.54 (1.44)	-0.39 (0.8)	-0.17 (1.09)	-0.55 (0.22)	-0.37 (0.13)	-0.17 (0.13)	-0.17	0.4974	-0.37
1229	HRG	HRG	P04196	310	EMIF-AD MBD	MRM	NA		0	0	2	Increase		0 (1)	0.2 (0.91)	-0.15 (0.95)	-0.02 (0.11)	0.2 (0.11)	-0.14 (0.08)	-0.22	0.15503	0.12	0.39931	0.34	0.012	-0.03 (0.84)	0.33 (0.88)	0.52 (1.02)	-0.09 (0.16)	0.33 (0.19)	0.51 (0.23)	-0.43	0.08657	-0.61	0.02826	-0.18	0.54114	0.31	0.0189	Increase linear	-0.29 (1.23)	-0.16 (0.82)	-0.08 (0.97)	-0.27 (0.2)	-0.13 (0.11)	-0.09 (0.12)	-0.14	0.56145	-0.17
1231	HS6ST1	HS6ST1	O60243	155	EMIF-AD MBD	MRM	NA		-1	0	1			0 (1)	-0.93 (1.89)	-0.19 (1.71)	0.02 (0.26)	-0.95 (0.27)	-0.19 (0.19)	0.96	0.01103	0.21	0.52024	-0.75	0.02315	-1.07 (1.95)	-0.73 (1.98)	-0.86 (1.88)	-1.06 (0.44)	-0.77 (0.59)	-0.85 (0.59)	-0.29	0.68967	-0.21	0.77795	0.09	0.91798	0.11	0.7947		0.5 (0.88)	-0.67 (2.19)	0.09 (1.17)	0.46 (0.63)	-0.67 (0.32)	0.1 (0.3)	1.12	0.12063	0.36
1232	HS6ST2	HS6ST2	Q96MM7	253	EMIF-AD MBD	MRM	NA		-1	0	1	Decrease		0 (1)	-0.51 (0.79)	0.26 (0.92)	-0.01 (0.12)	-0.52 (0.12)	0.28 (0.08)	0.51	0.00239	-0.29	0.06121	-0.8	0	-0.2 (0.65)	-0.68 (0.72)	-0.87 (0.99)	-0.25 (0.17)	-0.67 (0.18)	-0.89 (0.25)	0.41	0.10262	0.64	0.03666	0.22	0.47687	-0.35	0.0092	Decrease linear	0.42 (0.94)	0.38 (0.92)	0.06 (0.89)	0.44 (0.2)	0.4 (0.11)	0.06 (0.12)	0.04	0.85353	0.38
1233	HS6ST3	HS6ST3	Q8IZP7	310	EMIF-AD MBD	MRM	NA		-1	1	1	Decrease	Decrease	0 (1)	-0.74 (0.98)	0.36 (0.92)	0 (0.11)	-0.75 (0.11)	0.37 (0.08)	0.75	0	-0.37	0.00899	-1.12	0	-0.45 (0.77)	-0.8 (0.97)	-1.29 (1.2)	-0.5 (0.16)	-0.79 (0.19)	-1.29 (0.22)	0.3	0.22234	0.79	0.00369	0.49	0.08904	-0.39	0.0065	Decrease linear	0.6 (0.96)	0.46 (0.89)	0.17 (0.91)	0.63 (0.2)	0.47 (0.11)	0.17 (0.12)	0.15	0.49959	0.46
1239	HSP90B1	HSP90B1	P14625	310	EMIF-AD MBD	MRM	NA		0	1	1			0 (1)	-0.2 (1.14)	0.46 (0.99)	0.03 (0.12)	-0.2 (0.12)	0.44 (0.09)	0.23	0.16391	-0.4	0.00933	-0.64	2e-05	-0.14 (1.15)	-0.31 (1.18)	-0.19 (1.1)	-0.12 (0.18)	-0.31 (0.21)	-0.19 (0.25)	0.19	0.50046	0.07	0.82111	-0.12	0.72199	-0.1	0.5541		0.61 (1.3)	0.56 (0.96)	0.29 (0.89)	0.6 (0.23)	0.55 (0.13)	0.3 (0.13)	0.05	0.84035	0.3
1240	HSP90B2P	HSP90B2P	Q58FF3	305	EMIF-AD MBD	MRM	NA		0	1	1			0 (1)	-0.03 (1.55)	0.42 (0.98)	0.03 (0.14)	-0.02 (0.13)	0.4 (0.1)	0.05	0.78944	-0.37	0.03158	-0.43	0.01079	0.18 (1.77)	-0.14 (1.4)	-0.29 (1.24)	0.24 (0.21)	-0.14 (0.25)	-0.28 (0.29)	0.38	0.24562	0.52	0.1511	0.13	0.72666	-0.32	0.1709		0.66 (1.12)	0.48 (0.87)	0.27 (1.05)	0.64 (0.26)	0.45 (0.15)	0.29 (0.15)	0.19	0.53194	0.35
1241	HSPA13	HSPA13	P48723	310	EMIF-AD MBD	MRM	NA		0	0	0			0 (1)	-0.21 (0.87)	-0.03 (0.93)	-0.06 (0.11)	-0.22 (0.11)	0.01 (0.08)	0.16	0.28801	-0.07	0.61922	-0.23	0.08167	-0.08 (0.98)	-0.36 (0.69)	-0.3 (0.87)	-0.15 (0.16)	-0.35 (0.19)	-0.32 (0.22)	0.21	0.39471	0.17	0.5328	-0.04	0.89325	-0.12	0.348		0.04 (0.76)	-0.07 (0.85)	-0.01 (1.07)	0.07 (0.2)	-0.02 (0.11)	-0.03 (0.12)	0.1	0.67564	0.1
1242	HSPA1A	HSPA1A	P0DMV8	290	EMIF-AD MBD	MRM	NA		0	0	0		Increase	0 (1)	-0.11 (0.65)	0.05 (1.12)	0.08 (0.12)	-0.12 (0.12)	0.01 (0.09)	0.19	0.24485	0.06	0.68461	-0.13	0.363	-0.14 (0.67)	0.02 (0.5)	-0.26 (0.8)	-0.07 (0.17)	0.02 (0.2)	-0.25 (0.25)	-0.09	0.73145	0.17	0.56585	0.27	0.40754	-0.06	0.5324		-0.51 (1.32)	0.19 (1.01)	0.08 (1.13)	-0.52 (0.22)	0.15 (0.12)	0.1 (0.13)	-0.67	0.00836	-0.62
1244	HSPA2	HSPA2	P54652	173	EMIF-AD MBD	MRM	NA		0	0	0			0 (1)	0.04 (0.54)	0.28 (0.97)	0.02 (0.14)	0.05 (0.14)	0.26 (0.1)	-0.02	0.91537	-0.24	0.19626	-0.21	0.22687	0.17 (0.39)	0.04 (0.71)	-0.15 (0.55)	0.2 (0.22)	0.05 (0.26)	-0.15 (0.26)	0.15	0.67617	0.35	0.31217	0.2	0.5884	-0.17	0.1209		0.28 (1.12)	0.29 (1.03)	0.26 (0.85)	0.27 (0.24)	0.28 (0.14)	0.26 (0.16)	-0.01	0.98514	0.01
1245	HSPA5	HSPA5	P11021	310	EMIF-AD MBD	MRM	NA		-1	0	1	Decrease		0 (1)	-0.38 (0.98)	0.19 (0.93)	-0.02 (0.11)	-0.39 (0.11)	0.2 (0.08)	0.37	0.01821	-0.22	0.11791	-0.59	2e-05	-0.17 (0.93)	-0.34 (0.97)	-0.87 (0.99)	-0.21 (0.16)	-0.33 (0.19)	-0.87 (0.22)	0.12	0.62492	0.65	0.01766	0.53	0.07045	-0.31	0.0313	Decrease linear	0.07 (0.87)	0.34 (0.95)	0.06 (0.9)	0.1 (0.2)	0.36 (0.11)	0.06 (0.12)	-0.26	0.26297	0.04
1246	HSPA6	HSPA6	P17066	156	EMIF-AD MBD	MRM	NA		0	0	0			0 (1)	-0.16 (0.5)	-0.22 (0.95)	0.09 (0.14)	-0.14 (0.15)	-0.27 (0.1)	0.23	0.2616	0.36	0.05242	0.13	0.48683	-0.07 (0.55)	-0.16 (0.54)	-0.3 (0.39)	0.03 (0.21)	-0.14 (0.29)	-0.21 (0.27)	0.17	0.63015	0.24	0.475	0.07	0.85323	-0.12	0.1904		-0.6 (0.94)	-0.06 (0.87)	-0.26 (1.03)	-0.61 (0.23)	-0.15 (0.13)	-0.22 (0.16)	-0.46	0.08124	-0.39
1247	HSPA7	HSPA7	P48741	149	EMIF-AD MBD	MRM	NA		0	0	0			0 (1)	-0.14 (0.48)	-0.21 (0.94)	0.09 (0.14)	-0.12 (0.15)	-0.27 (0.11)	0.21	0.31181	0.37	0.0527	0.15	0.41781	-0.06 (0.52)	-0.15 (0.55)	-0.26 (0.38)	0.05 (0.21)	-0.13 (0.3)	-0.17 (0.27)	0.18	0.6244	0.22	0.51063	0.04	0.91646	-0.11	0.217		-0.59 (0.95)	-0.06 (0.88)	-0.25 (1.01)	-0.57 (0.23)	-0.16 (0.13)	-0.23 (0.16)	-0.42	0.1223	-0.35
1248	HSPA8	HSPA8	P11142	310	EMIF-AD MBD	MRM	NA		0	1	1	Decrease		0 (1)	-0.22 (0.73)	0.49 (1.02)	0.03 (0.11)	-0.23 (0.11)	0.48 (0.08)	0.26	0.09545	-0.45	0.00143	-0.71	0	-0.06 (0.62)	-0.23 (0.65)	-0.56 (0.96)	-0.06 (0.16)	-0.23 (0.19)	-0.54 (0.22)	0.17	0.4848	0.49	0.07664	0.31	0.28556	-0.24	0.0269	Decrease linear	0.35 (1.29)	0.59 (0.86)	0.44 (1.09)	0.36 (0.2)	0.57 (0.11)	0.45 (0.12)	-0.21	0.37225	-0.08
1249	HSPA9	HSPA9	P38646	269	EMIF-AD MBD	MRM	NA		0	1	1			0 (1)	-0.25 (1)	0.52 (1.01)	0 (0.12)	-0.25 (0.12)	0.53 (0.09)	0.25	0.14519	-0.53	0.001	-0.78	0	-0.05 (0.77)	-0.19 (0.93)	-0.68 (1.34)	-0.08 (0.2)	-0.17 (0.21)	-0.67 (0.25)	0.09	0.75546	0.59	0.06502	0.49	0.13186	-0.29	0.0812		0.23 (1.19)	0.64 (0.81)	0.49 (1.14)	0.26 (0.24)	0.64 (0.13)	0.5 (0.14)	-0.38	0.1598	-0.24
1250	HSPB1	HSPB1	P04792	130	EMIF-AD MBD	MRM	NA		0	0	0			0 (1)	0.33 (0.57)	-0.03 (1.12)	0.12 (0.18)	0.29 (0.19)	-0.07 (0.12)	-0.17	0.51653	0.19	0.40906	0.36	0.10416	0.13 (0.39)	0.79 (0.41)	0.13 (0.71)	0.17 (0.29)	0.73 (0.34)	0.13 (0.35)	-0.56	0.22331	0.03	0.93881	0.59	0.22841	-0.01	0.9581		-0.14 (1.16)	0.03 (1.05)	-0.05 (1.22)	-0.12 (0.34)	-0.02 (0.18)	0 (0.19)	-0.11	0.78342	-0.13
1252	HSPE1	HSPE1	P61604	253	EMIF-AD MBD	MRM	NA		0	1	1	Decrease		0 (1)	-0.12 (0.68)	0.4 (0.72)	-0.01 (0.1)	-0.13 (0.1)	0.42 (0.07)	0.12	0.40996	-0.43	0.00109	-0.55	1e-05	0.01 (0.54)	-0.1 (0.85)	-0.38 (0.65)	-0.01 (0.13)	-0.11 (0.16)	-0.38 (0.18)	0.1	0.62607	0.37	0.09103	0.27	0.25787	-0.21	0.0461	Decrease linear	0.34 (0.93)	0.37 (0.69)	0.47 (0.67)	0.36 (0.16)	0.38 (0.1)	0.46 (0.1)	-0.02	0.91924	-0.1
1253	HSPG2	HSPG2	P98160	310	EMIF-AD MBD	MRM	NA		0	0	1			0 (1)	0.01 (0.86)	0.38 (0.9)	0.13 (0.11)	0.01 (0.1)	0.31 (0.08)	0.12	0.4249	-0.18	0.18758	-0.3	0.02144	-0.02 (1.04)	0.17 (0.81)	-0.15 (0.43)	0.07 (0.15)	0.16 (0.18)	-0.12 (0.21)	-0.09	0.71299	0.2	0.44961	0.28	0.31078	-0.06	0.6288		0.48 (0.89)	0.4 (0.83)	0.32 (0.99)	0.44 (0.19)	0.33 (0.11)	0.35 (0.11)	0.11	0.62656	0.09
1255	HTRA1	HTRA1	Q92743	310	EMIF-AD MBD	MRM	NA		0	1	1			0 (1)	-0.06 (1.08)	0.5 (0.93)	-0.02 (0.12)	-0.07 (0.11)	0.51 (0.08)	0.05	0.77053	-0.53	0.00042	-0.57	5e-05	0.09 (1.07)	-0.41 (1.04)	0.12 (1.1)	0.06 (0.17)	-0.41 (0.2)	0.12 (0.24)	0.46	0.08024	-0.06	0.82714	-0.52	0.09413	-0.03	0.857		0.4 (1.09)	0.53 (0.89)	0.49 (0.93)	0.42 (0.22)	0.54 (0.12)	0.49 (0.13)	-0.12	0.61687	-0.07
1256	HYAL1	HYAL1	Q12794	189	EMIF-AD MBD	MRM	NA		0	0	0			0 (1)	0.21 (0.79)	0.02 (0.92)	-0.06 (0.14)	0.21 (0.13)	0.05 (0.1)	-0.27	0.1631	-0.11	0.53518	0.16	0.33231	0.12 (0.81)	0.36 (0.84)	0.14 (0.67)	0.09 (0.19)	0.36 (0.21)	0.1 (0.32)	-0.27	0.34669	-0.01	0.97809	0.26	0.4969	0.06	0.711		0.01 (1.13)	-0.05 (0.92)	0.09 (0.86)	0.06 (0.24)	-0.04 (0.14)	0.09 (0.14)	0.1	0.72983	-0.03
1257	HYI	HYI	Q5T013	263	EMIF-AD MBD	MRM	NA		1	0	2			0 (1)	0.31 (1.18)	-0.18 (1.08)	-0.06 (0.14)	0.32 (0.13)	-0.15 (0.1)	-0.38	0.04699	0.09	0.59671	0.48	0.00423	0.1 (1.15)	0.43 (1.06)	0.6 (1.41)	0.11 (0.2)	0.43 (0.25)	0.6 (0.3)	-0.32	0.32294	-0.48	0.17921	-0.16	0.6734	0.27	0.1481		-0.26 (1.11)	-0.28 (0.93)	-0.04 (1.21)	-0.29 (0.26)	-0.27 (0.15)	-0.05 (0.15)	-0.03	0.93066	-0.24
1258	HYOU1	HYOU1	Q9Y4L1	310	EMIF-AD MBD	MRM	NA		-1	1	1			0 (1)	-0.5 (0.86)	0.28 (0.79)	-0.05 (0.1)	-0.51 (0.1)	0.31 (0.07)	0.46	0.00099	-0.36	0.00513	-0.83	0	-0.36 (0.73)	-0.57 (0.83)	-0.73 (1.11)	-0.43 (0.14)	-0.56 (0.16)	-0.74 (0.2)	0.13	0.53717	0.31	0.19292	0.18	0.48575	-0.18	0.1629		0.39 (0.86)	0.35 (0.78)	0.18 (0.78)	0.43 (0.18)	0.38 (0.1)	0.17 (0.1)	0.04	0.82525	0.26
1260	ICAM1	ICAM1	P05362	270	ADNI	RBM	0	2	0	0	1			0 (1)	0.01 (1.11)	0.25 (1.11)	-0.03 (0.14)	-0.06 (0.11)	0.24 (0.09)	0.03	0.86369	-0.27	0.11277	-0.3	0.03489	-0.17 (0.7)	0.05 (1.27)	0.11 (1.07)	-0.14 (0.22)	-0.07 (0.15)	0.01 (0.22)	-0.08	0.77341	-0.16	0.61297	-0.08	0.75845	0.07	0.6655		0.61 (0.99)	0.29 (1.18)	0.09 (1.01)	0.36 (0.3)	0.28 (0.13)	0.13 (0.16)	0.08	0.8121	0.23
1261	ICAM1	ICAM1	P05362	255	EMIF-AD MBD	MRM	NA	1	-1	-1	0			0 (1)	-0.33 (0.8)	-0.14 (1)	0.14 (0.13)	-0.32 (0.12)	-0.21 (0.09)	0.46	0.00856	0.35	0.03251	-0.11	0.43358	-0.33 (0.93)	-0.28 (0.77)	-0.4 (0.65)	-0.23 (0.19)	-0.28 (0.19)	-0.38 (0.25)	0.05	0.85401	0.16	0.61875	0.11	0.73619	-0.04	0.7481		-0.21 (1.06)	-0.1 (1.11)	-0.16 (0.84)	-0.24 (0.22)	-0.15 (0.12)	-0.15 (0.13)	-0.08	0.74206	-0.09
1262	ICAM2	ICAM2	P13598	296	EMIF-AD MBD	MRM	NA		0	0	0			0 (1)	-0.06 (0.81)	0.23 (0.9)	0.07 (0.11)	-0.07 (0.11)	0.19 (0.08)	0.14	0.35858	-0.12	0.39773	-0.26	0.05486	-0.09 (0.82)	-0.07 (0.67)	0.02 (1)	-0.07 (0.16)	-0.07 (0.18)	0.03 (0.22)	0.01	0.97474	-0.09	0.73498	-0.1	0.72544	-0.01	0.9553		0.15 (1.17)	0.21 (0.91)	0.28 (0.8)	0.14 (0.2)	0.19 (0.11)	0.29 (0.12)	-0.05	0.82421	-0.15
1263	ICAM5	ICAM5	Q9UMF0	310	EMIF-AD MBD	MRM	NA		-1	1	1	Decrease	Decrease	0 (1)	-0.54 (1.02)	0.38 (0.92)	-0.01 (0.11)	-0.55 (0.11)	0.39 (0.08)	0.54	0.00053	-0.4	0.00515	-0.94	0	-0.29 (0.79)	-0.55 (0.95)	-1.07 (1.36)	-0.34 (0.16)	-0.54 (0.19)	-1.07 (0.23)	0.2	0.4183	0.73	0.00851	0.53	0.07417	-0.37	0.0135	Decrease linear	0.62 (1.19)	0.44 (0.83)	0.23 (0.91)	0.65 (0.2)	0.46 (0.12)	0.23 (0.12)	0.19	0.4038	0.43
1264	ICOSLG	ICOSLG	O75144	310	EMIF-AD MBD	MRM	NA		-1	0	1	Decrease	Decrease	0 (1)	-0.5 (1)	0.28 (0.81)	0.03 (0.11)	-0.5 (0.1)	0.26 (0.08)	0.53	0.00044	-0.23	0.08923	-0.76	0	-0.28 (1.07)	-0.54 (0.9)	-0.9 (0.89)	-0.27 (0.15)	-0.54 (0.18)	-0.9 (0.21)	0.26	0.26108	0.63	0.01587	0.36	0.18839	-0.31	0.0361	Decrease linear	0.47 (0.97)	0.38 (0.79)	0.09 (0.76)	0.47 (0.19)	0.38 (0.11)	0.09 (0.11)	0.1	0.6585	0.38
1266	IDS	IDS	P22304	310	EMIF-AD MBD	MRM	NA		0	1	1	Decrease		0 (1)	-0.22 (0.91)	0.25 (0.77)	-0.05 (0.1)	-0.23 (0.1)	0.28 (0.07)	0.18	0.1904	-0.33	0.01114	-0.51	3e-05	0.02 (0.88)	-0.31 (0.86)	-0.59 (0.97)	-0.04 (0.14)	-0.3 (0.16)	-0.6 (0.2)	0.26	0.22922	0.56	0.02058	0.3	0.2467	-0.29	0.0305	Decrease linear	0.38 (0.95)	0.26 (0.74)	0.19 (0.75)	0.42 (0.18)	0.29 (0.1)	0.19 (0.1)	0.13	0.52758	0.23
1267	IFI30	IFI30	P13284	161	EMIF-AD MBD	MRM	NA		1	0	0			0 (1)	0.31 (1.14)	-0.09 (0.95)	-0.18 (0.17)	0.28 (0.15)	0.01 (0.12)	-0.46	0.0421	-0.19	0.36593	0.27	0.16576	0.62 (1.19)	0.05 (0.88)	0.01 (1.31)	0.49 (0.23)	0.07 (0.28)	-0.01 (0.34)	0.42	0.25117	0.5	0.22199	0.08	0.85442	-0.26	0.2614		0.21 (0.88)	-0.26 (0.86)	-0.03 (1.06)	0.2 (0.28)	-0.17 (0.17)	-0.04 (0.18)	0.36	0.26975	0.23
1269	IFNAR1	IFNAR1	P17181	176	EMIF-AD MBD	MRM	NA		0	0	0			0 (1)	-0.24 (1.37)	0.08 (1.16)	-0.01 (0.18)	-0.24 (0.19)	0.08 (0.13)	0.23	0.38347	-0.09	0.70249	-0.32	0.16687	-0.35 (1.31)	-0.14 (1.47)	-0.25 (1.45)	-0.31 (0.33)	-0.14 (0.32)	-0.23 (0.44)	-0.17	0.70883	-0.08	0.88312	0.09	0.86798	0.02	0.9526		0.26 (1.23)	-0.02 (1.05)	0.12 (1.27)	0.26 (0.31)	-0.04 (0.2)	0.12 (0.22)	0.31	0.40408	0.14
1270	IFNAR2	IFNAR2	P48551	240	EMIF-AD MBD	MRM	NA		-1	1	1			0 (1)	-0.47 (0.84)	0.24 (0.75)	-0.05 (0.11)	-0.49 (0.11)	0.27 (0.08)	0.44	0.00664	-0.33	0.02145	-0.77	0	-0.28 (0.83)	-0.54 (0.83)	-0.72 (0.86)	-0.35 (0.16)	-0.54 (0.19)	-0.74 (0.21)	0.19	0.44039	0.4	0.12818	0.21	0.46064	-0.21	0.1407		0.47 (1.08)	0.27 (0.68)	0.14 (0.68)	0.5 (0.19)	0.3 (0.1)	0.13 (0.1)	0.19	0.36419	0.37
1272	IGF2	IGF2	P01344	310	EMIF-AD MBD	MRM	NA		0	0	0			0 (1)	0 (0.91)	0.1 (0.75)	-0.05 (0.1)	0 (0.1)	0.13 (0.07)	-0.05	0.73853	-0.18	0.16035	-0.14	0.27081	0.01 (1.02)	-0.21 (0.89)	0.27 (0.59)	-0.03 (0.14)	-0.21 (0.16)	0.26 (0.2)	0.18	0.40564	-0.29	0.22693	-0.47	0.06855	0.13	0.3277		-0.06 (0.67)	0.12 (0.73)	0.14 (0.81)	-0.04 (0.18)	0.15 (0.1)	0.13 (0.1)	-0.19	0.34339	-0.17
1273	IGF2R	IGF2R	P11717	298	EMIF-AD MBD	MRM	NA		0	0	0			0 (1)	0 (0.73)	0.07 (0.95)	0.01 (0.11)	0 (0.11)	0.06 (0.08)	0.02	0.90746	-0.05	0.72207	-0.07	0.61038	-0.04 (0.76)	0.01 (0.83)	0.08 (0.51)	-0.04 (0.15)	0.01 (0.19)	0.08 (0.23)	-0.04	0.86408	-0.12	0.6724	-0.08	0.79802	0.05	0.6795		0.04 (1.17)	0.15 (0.83)	-0.01 (0.99)	0.04 (0.2)	0.14 (0.11)	-0.01 (0.12)	-0.11	0.64146	0.04
1274	IGFALS	IGFALS	P35858	310	EMIF-AD MBD	MRM	NA		0	0	2			0 (1)	0.11 (0.92)	-0.33 (1.05)	-0.15 (0.12)	0.11 (0.11)	-0.25 (0.08)	-0.25	0.11905	0.1	0.48609	0.35	0.01189	0.03 (0.9)	0.13 (1.02)	0.28 (0.82)	-0.09 (0.17)	0.13 (0.2)	0.25 (0.24)	-0.23	0.38859	-0.34	0.24733	-0.11	0.72262	0.15	0.2731		-0.26 (1.01)	-0.41 (0.95)	-0.27 (1.17)	-0.21 (0.22)	-0.33 (0.12)	-0.3 (0.13)	0.11	0.64697	0.09
1275	IGFBP2	IGFBP2	P18065	249	ADNI	MRM	1	2	0	1	1			0.01 (0.93)	-0.17 (0.84)	0.31 (0.98)	-0.03 (0.11)	-0.24 (0.09)	0.3 (0.07)	0.21	0.15473	-0.34	0.01398	-0.54	0	-0.16 (0.9)	-0.23 (0.78)	-0.05 (0.93)	-0.12 (0.18)	-0.34 (0.12)	-0.15 (0.18)	0.23	0.30415	0.03	0.91061	-0.2	0.35475	0	0.9823		0.57 (0.61)	0.23 (0.83)	0.36 (1.25)	0.27 (0.23)	0.24 (0.1)	0.4 (0.13)	0.03	0.90539	-0.13
1276	IGFBP2	IGFBP2	P18065	310	EMIF-AD MBD	MRM	NA	1	0	0	1			0 (1)	-0.07 (0.95)	0.3 (0.82)	0.07 (0.1)	-0.07 (0.1)	0.26 (0.08)	0.14	0.3394	-0.19	0.15974	-0.33	0.01015	-0.1 (1.07)	-0.12 (0.88)	0.08 (0.78)	-0.04 (0.15)	-0.13 (0.18)	0.1 (0.21)	0.09	0.70457	-0.14	0.59468	-0.22	0.41536	0.07	0.6166		0.18 (0.77)	0.33 (0.81)	0.31 (0.85)	0.16 (0.19)	0.29 (0.11)	0.32 (0.11)	-0.13	0.53686	-0.17
1277	IGFBP3	IGFBP3	P17936	310	EMIF-AD MBD	MRM	NA		0	0	0			0 (1)	-0.1 (1.06)	0.19 (1.08)	0.09 (0.12)	-0.1 (0.12)	0.14 (0.09)	0.18	0.28405	-0.06	0.71661	-0.24	0.10729	-0.07 (1.23)	-0.04 (0.98)	-0.23 (0.79)	0.02 (0.18)	-0.05 (0.22)	-0.2 (0.26)	0.07	0.81249	0.23	0.47817	0.16	0.64392	-0.08	0.6312		0.07 (0.6)	0.26 (1.09)	0.16 (1.19)	0.04 (0.23)	0.19 (0.13)	0.18 (0.14)	-0.16	0.55962	-0.14
1278	IGFBP4	IGFBP4	P22692	310	EMIF-AD MBD	MRM	NA		0	0	1			0 (1)	-0.03 (0.84)	0.33 (0.87)	0.1 (0.1)	-0.03 (0.1)	0.28 (0.07)	0.12	0.39853	-0.19	0.16537	-0.31	0.0153	-0.03 (0.95)	0.04 (0.87)	-0.12 (0.55)	0.03 (0.15)	0.03 (0.17)	-0.1 (0.21)	0	0.98849	0.13	0.61376	0.13	0.62924	-0.03	0.7911		0.39 (0.89)	0.43 (0.79)	0.21 (0.93)	0.37 (0.19)	0.38 (0.11)	0.23 (0.11)	-0.01	0.95016	0.14
1279	IGFBP5	IGFBP5	P24593	310	EMIF-AD MBD	MRM	NA		0	1	0			0 (1)	0.13 (0.83)	0.24 (0.69)	-0.02 (0.1)	0.13 (0.09)	0.25 (0.07)	-0.15	0.26604	-0.28	0.0242	-0.13	0.26609	0.14 (1.02)	0.06 (0.74)	0.21 (0.49)	0.14 (0.13)	0.06 (0.15)	0.21 (0.18)	0.08	0.69182	-0.08	0.73336	-0.15	0.51524	0.06	0.6477		0.15 (0.62)	0.3 (0.62)	0.2 (0.78)	0.15 (0.16)	0.31 (0.09)	0.2 (0.1)	-0.15	0.41131	-0.05
1280	IGFBP6	IGFBP6	P24592	310	EMIF-AD MBD	MRM	NA		0	0	0	Increase		0 (1)	0.09 (1.12)	0.03 (0.8)	-0.04 (0.11)	0.09 (0.11)	0.05 (0.08)	-0.14	0.37621	-0.1	0.48418	0.04	0.78194	-0.12 (1.36)	0.08 (0.73)	0.54 (0.89)	-0.14 (0.16)	0.08 (0.19)	0.53 (0.22)	-0.22	0.36514	-0.67	0.0141	-0.45	0.12389	0.35	0.0315	Increase linear	-0.01 (0.76)	0.06 (0.78)	0.02 (0.86)	-0.01 (0.2)	0.08 (0.11)	0.01 (0.12)	-0.09	0.68293	-0.02
1281	IGFBP7	IGFBP7	Q16270	310	EMIF-AD MBD	MRM	NA		1	0	2			0 (1)	0.21 (1.08)	-0.26 (0.85)	-0.15 (0.11)	0.2 (0.1)	-0.17 (0.08)	-0.35	0.02034	0.02	0.88118	0.37	0.0049	0.41 (1.2)	-0.01 (0.86)	0.1 (1.05)	0.25 (0.15)	0 (0.18)	0.07 (0.22)	0.26	0.2828	0.18	0.48982	-0.07	0.79505	-0.07	0.6362		-0.49 (0.81)	-0.24 (0.79)	-0.21 (0.93)	-0.43 (0.2)	-0.14 (0.11)	-0.24 (0.11)	-0.28	0.20945	-0.19
1283	IGHA1	IGHA1	P01876	270	ADNI	RBM	0	2	0	0	0			0 (1)	0.04 (1.27)	0.01 (1.04)	-0.01 (0.15)	-0.08 (0.11)	-0.03 (0.1)	0.07	0.71673	0.01	0.93855	-0.05	0.716	-0.03 (1.3)	0.03 (1.31)	0.12 (1.23)	0.04 (0.23)	-0.16 (0.16)	-0.07 (0.23)	0.19	0.49143	0.1	0.75305	-0.09	0.73807	-0.02	0.9243		0.61 (1.18)	-0.02 (1.03)	-0.1 (1)	0.37 (0.32)	-0.09 (0.13)	-0.05 (0.17)	0.47	0.17445	0.43
1284	IGHA1	IGHA1	P01876	310	EMIF-AD MBD	MRM	NA	1	0	0	0			0 (1)	0.11 (0.82)	-0.11 (0.99)	0 (0.11)	0.12 (0.11)	-0.11 (0.08)	-0.12	0.43449	0.11	0.4295	0.23	0.08399	0.18 (0.84)	0.1 (0.9)	-0.01 (0.68)	0.22 (0.16)	0.09 (0.19)	-0.02 (0.22)	0.13	0.60924	0.23	0.39361	0.11	0.71416	-0.13	0.2926		0.16 (1.1)	-0.34 (0.97)	0.06 (0.94)	0.13 (0.2)	-0.35 (0.11)	0.06 (0.12)	0.48	0.03697	0.07
1286	IGHD	IGHD	P01880	302	EMIF-AD MBD	MRM	NA		0	0	0			0 (1)	-0.04 (0.95)	-0.15 (0.87)	-0.06 (0.11)	-0.04 (0.11)	-0.12 (0.08)	-0.02	0.89832	0.05	0.70189	0.07	0.57414	0.24 (0.93)	-0.51 (0.9)	0.01 (0.84)	0.19 (0.15)	-0.51 (0.18)	-0.02 (0.21)	0.69	0.00333	0.2	0.43237	-0.49	0.07935	-0.14	0.2996		-0.09 (1.09)	-0.09 (0.9)	-0.25 (0.76)	-0.08 (0.2)	-0.04 (0.11)	-0.27 (0.11)	-0.04	0.85169	0.19
1287	IGHG1	IGHG1	P01857	310	EMIF-AD MBD	MRM	NA		0	0	0	Increase	Increase	0 (1)	0.05 (0.86)	-0.16 (0.92)	0.01 (0.11)	0.06 (0.1)	-0.16 (0.08)	-0.05	0.75044	0.17	0.21161	0.22	0.09252	-0.17 (0.91)	0.18 (0.67)	0.32 (0.9)	-0.14 (0.15)	0.18 (0.18)	0.32 (0.22)	-0.31	0.19059	-0.46	0.08107	-0.15	0.59625	0.25	0.0443	Increase linear	-0.49 (1.2)	-0.14 (0.81)	-0.06 (0.9)	-0.51 (0.19)	-0.15 (0.11)	-0.06 (0.11)	-0.36	0.10332	-0.45
1288	IGHG2	IGHG2	P01859	310	EMIF-AD MBD	MRM	NA		0	0	2			0 (1)	0.25 (1.15)	-0.25 (1.12)	0 (0.13)	0.26 (0.12)	-0.25 (0.09)	-0.26	0.14602	0.25	0.1297	0.51	0.00117	0.11 (1.07)	0.35 (1.33)	0.39 (1.06)	0.14 (0.19)	0.35 (0.23)	0.39 (0.27)	-0.21	0.49508	-0.25	0.45551	-0.04	0.90251	0.12	0.4825		-0.13 (1.48)	-0.39 (1.16)	-0.13 (0.91)	-0.15 (0.25)	-0.4 (0.14)	-0.13 (0.14)	0.25	0.37914	-0.01
1289	IGHG3	IGHG3	P01860	310	EMIF-AD MBD	MRM	NA		0	-1	2			0 (1)	0.15 (1.17)	-0.31 (1.15)	0.03 (0.13)	0.15 (0.13)	-0.33 (0.09)	-0.13	0.4919	0.35	0.03543	0.48	0.00273	0.03 (1.04)	0.19 (1.43)	0.34 (1.08)	0.06 (0.2)	0.18 (0.24)	0.35 (0.28)	-0.13	0.68292	-0.29	0.3954	-0.17	0.653	0.14	0.4228		-0.22 (1.18)	-0.48 (1.2)	-0.16 (1.07)	-0.23 (0.25)	-0.5 (0.14)	-0.15 (0.15)	0.27	0.36098	-0.08
1290	IGHG4	IGHG4	P01861	310	EMIF-AD MBD	MRM	NA		0	0	0			0 (1)	0.1 (0.87)	0.02 (0.98)	0.05 (0.11)	0.11 (0.11)	-0.02 (0.08)	-0.06	0.69958	0.06	0.65004	0.12	0.35676	0.09 (0.68)	-0.07 (0.83)	0.37 (1.21)	0.18 (0.16)	-0.08 (0.19)	0.38 (0.22)	0.26	0.29012	-0.2	0.46367	-0.46	0.11646	0.08	0.5316		0.07 (1.33)	-0.15 (0.89)	0.18 (0.92)	0.01 (0.2)	-0.19 (0.11)	0.2 (0.12)	0.21	0.3634	-0.18
1291	IGHM	IGHM	P01871	310	EMIF-AD MBD	MRM	NA		0	0	2			0 (1)	0.04 (1.15)	-0.31 (0.99)	-0.01 (0.12)	0.04 (0.12)	-0.3 (0.09)	-0.04	0.80374	0.3	0.05702	0.34	0.02193	-0.04 (1.05)	0.22 (1.37)	-0.05 (1.05)	-0.06 (0.18)	0.22 (0.22)	-0.05 (0.26)	-0.28	0.31684	-0.01	0.97344	0.27	0.41748	0.03	0.8557		-0.06 (1.38)	-0.35 (0.77)	-0.34 (1.06)	-0.05 (0.23)	-0.34 (0.13)	-0.35 (0.13)	0.29	0.28005	0.3
1292	IGHV1-18	IGHV1-18	A0A0C4DH31	137	EMIF-AD MBD	MRM	NA		0	0	0			0 (1)	-0.33 (0.9)	-0.16 (1.12)	-0.05 (0.2)	-0.32 (0.2)	-0.14 (0.12)	0.28	0.34712	0.09	0.71156	-0.18	0.43386	-0.4 (0.7)	-0.11 (0.69)	-0.81 (1.75)	-0.4 (0.32)	-0.15 (0.31)	-0.76 (0.54)	-0.25	0.57233	0.36	0.56908	0.61	0.32797	-0.07	0.7777		-0.36 (1.18)	-0.27 (0.81)	-0.01 (1.34)	-0.38 (0.36)	-0.23 (0.19)	-0.03 (0.18)	-0.15	0.71037	-0.35
1293	IGHV1-2	IGHV1-2	P23083	310	EMIF-AD MBD	MRM	NA		0	0	0			0 (1)	-0.09 (0.92)	-0.19 (1.06)	0.03 (0.12)	-0.09 (0.12)	-0.21 (0.09)	0.11	0.48632	0.24	0.1158	0.12	0.38711	-0.1 (0.77)	-0.03 (0.86)	-0.17 (1.3)	-0.06 (0.17)	-0.03 (0.21)	-0.16 (0.25)	-0.03	0.90589	0.1	0.73448	0.13	0.67767	-0.03	0.8339		0.17 (1.36)	-0.42 (1)	-0.07 (0.98)	0.15 (0.22)	-0.44 (0.13)	-0.06 (0.13)	0.59	0.01963	0.22
1294	IGHV1-24	IGHV1-24	A0A0C4DH33	158	EMIF-AD MBD	MRM	NA		0	0	0			0 (1)	-0.27 (0.73)	-0.33 (0.53)	-0.06 (0.12)	-0.28 (0.12)	-0.3 (0.08)	0.22	0.19916	0.24	0.11564	0.02	0.88174	-0.36 (0.48)	-0.26 (0.58)	-0.12 (1.2)	-0.4 (0.16)	-0.26 (0.17)	-0.13 (0.2)	-0.14	0.55092	-0.27	0.29154	-0.13	0.61633	0.12	0.4539		-0.53 (0.45)	-0.28 (0.58)	-0.29 (0.5)	-0.53 (0.16)	-0.26 (0.1)	-0.29 (0.1)	-0.27	0.14835	-0.24
1295	IGHV1-3	IGHV1-3	A0A0C4DH29	202	EMIF-AD MBD	MRM	NA		1	1	0			0 (1)	0.41 (0.97)	0.26 (0.96)	-0.14 (0.15)	0.41 (0.14)	0.32 (0.1)	-0.56	0.00713	-0.47	0.01078	0.09	0.59233	0.24 (0.98)	0.36 (0.93)	0.81 (1.02)	0.16 (0.22)	0.36 (0.24)	0.76 (0.3)	-0.2	0.5423	-0.59	0.11403	-0.39	0.30811	0.3	0.089		0.47 (1.22)	0.27 (0.69)	0.18 (1.13)	0.5 (0.26)	0.33 (0.14)	0.14 (0.14)	0.17	0.56453	0.36
1297	IGHV1-46	IGHV1-46	P01743	277	EMIF-AD MBD	MRM	NA		0	0	0			0 (1)	-0.09 (1.15)	-0.3 (1.18)	-0.06 (0.14)	-0.08 (0.13)	-0.27 (0.1)	0.02	0.90227	0.21	0.23198	0.19	0.26455	-0.31 (1.04)	-0.07 (1.09)	0.28 (1.39)	-0.27 (0.21)	-0.08 (0.25)	0.26 (0.28)	-0.19	0.5729	-0.53	0.12993	-0.34	0.36338	0.27	0.1192		-0.54 (1.25)	-0.37 (1.03)	-0.12 (1.3)	-0.57 (0.27)	-0.38 (0.15)	-0.12 (0.16)	-0.19	0.53164	-0.45
1298	IGHV1-58	IGHV1-58	A0A0C4DH39	279	EMIF-AD MBD	MRM	NA		0	0	0			0 (1)	-0.11 (1.05)	-0.23 (1.04)	-0.01 (0.12)	-0.1 (0.13)	-0.23 (0.09)	0.09	0.59943	0.22	0.16695	0.13	0.40791	-0.2 (1.09)	-0.03 (0.81)	-0.06 (1.34)	-0.16 (0.2)	-0.03 (0.22)	-0.05 (0.27)	-0.13	0.65878	-0.11	0.73741	0.02	0.95738	0.09	0.5965		-0.15 (1.2)	-0.3 (1.13)	-0.18 (0.89)	-0.17 (0.24)	-0.32 (0.14)	-0.18 (0.14)	0.15	0.58308	0.01
1299	IGHV1-69	IGHV1-69	P01742	310	EMIF-AD MBD	MRM	NA		0	0	0	Increase		0 (1)	-0.01 (0.98)	-0.08 (1.09)	0.06 (0.12)	0 (0.12)	-0.12 (0.09)	0.06	0.7384	0.18	0.25611	0.12	0.41385	-0.32 (0.83)	0.3 (0.92)	0.22 (1.19)	-0.26 (0.18)	0.3 (0.21)	0.23 (0.25)	-0.55	0.04917	-0.48	0.11976	0.07	0.83664	0.32	0.0261	Increase linear	-0.03 (1.47)	-0.1 (0.98)	-0.08 (1.08)	-0.06 (0.23)	-0.13 (0.13)	-0.07 (0.13)	0.07	0.78805	0
1300	IGHV1-69-2	IGHV1-69-2	A0A0G2JMI3	270	EMIF-AD MBD	MRM	NA		0	0	0			0 (1)	-0.05 (0.96)	-0.04 (0.97)	-0.04 (0.12)	-0.05 (0.13)	-0.02 (0.09)	0.01	0.95869	-0.02	0.90657	-0.03	0.85879	-0.17 (0.87)	-0.11 (1.16)	0.25 (0.78)	-0.18 (0.2)	-0.11 (0.22)	0.25 (0.26)	-0.07	0.80405	-0.42	0.19414	-0.35	0.30322	0.26	0.095		0.02 (0.91)	-0.09 (1.1)	0 (0.85)	0.02 (0.22)	-0.08 (0.13)	0 (0.13)	0.1	0.69435	0.02
1303	IGHV2-26	IGHV2-26	A0A0B4J1V2	161	EMIF-AD MBD	MRM	NA		0	0	0			0 (1)	-0.24 (1.01)	-0.1 (1.28)	0 (0.19)	-0.24 (0.19)	-0.1 (0.14)	0.23	0.37877	0.1	0.69175	-0.13	0.57423	-0.13 (0.87)	-0.32 (1.29)	-0.35 (0.98)	-0.07 (0.31)	-0.3 (0.37)	-0.31 (0.41)	0.23	0.63318	0.24	0.64166	0.01	0.98912	-0.13	0.5344		-0.42 (1.04)	-0.06 (1.12)	-0.03 (1.51)	-0.44 (0.36)	-0.11 (0.22)	-0.01 (0.21)	-0.32	0.44039	-0.43
1304	IGHV2-70	IGHV2-70	P01814	170	EMIF-AD MBD	MRM	NA		0	0	0			0 (1)	0.15 (1.11)	-0.16 (1.04)	-0.03 (0.17)	0.16 (0.16)	-0.16 (0.12)	-0.19	0.41916	0.13	0.55249	0.32	0.10536	0.06 (1.18)	0.35 (1.11)	0.06 (1.07)	0.08 (0.25)	0.33 (0.29)	0.06 (0.32)	-0.24	0.52993	0.02	0.95265	0.27	0.53677	-0.02	0.9198		-0.2 (1.31)	-0.29 (1.17)	-0.03 (0.78)	-0.26 (0.3)	-0.27 (0.18)	-0.03 (0.18)	0.01	0.97061	-0.23
1305	IGHV2-70D	IGHV2-70D	A0A0C4DH43	273	EMIF-AD MBD	MRM	NA		0	0	0		Increase	0 (1)	-0.13 (1.07)	-0.07 (1.01)	-0.06 (0.13)	-0.13 (0.13)	-0.03 (0.09)	0.07	0.7006	-0.04	0.83104	-0.1	0.50801	-0.06 (0.96)	-0.13 (1.2)	-0.24 (1.18)	-0.1 (0.19)	-0.13 (0.22)	-0.26 (0.26)	0.03	0.91848	0.15	0.62938	0.12	0.71556	-0.04	0.8158		-0.72 (1.31)	-0.16 (1)	0.23 (0.79)	-0.71 (0.24)	-0.14 (0.14)	0.23 (0.13)	-0.57	0.03852	-0.94
1307	IGHV3-13	IGHV3-13	P01766	298	EMIF-AD MBD	MRM	NA		0	0	0			0 (1)	-0.06 (0.95)	-0.15 (0.88)	0.04 (0.11)	-0.06 (0.11)	-0.17 (0.08)	0.1	0.53172	0.21	0.14164	0.11	0.41138	-0.23 (0.99)	-0.01 (0.57)	0.25 (1.23)	-0.22 (0.16)	-0.01 (0.19)	0.25 (0.23)	-0.21	0.41073	-0.47	0.09709	-0.26	0.38918	0.19	0.1825		-0.05 (0.96)	-0.15 (0.81)	-0.19 (0.94)	-0.05 (0.21)	-0.16 (0.11)	-0.18 (0.12)	0.11	0.65121	0.13
1308	IGHV3-15	IGHV3-15	A0A0B4J1V0	234	EMIF-AD MBD	MRM	NA		0	0	2			0 (1)	0.26 (1.13)	-0.2 (1.14)	-0.1 (0.15)	0.23 (0.14)	-0.13 (0.11)	-0.33	0.11199	0.03	0.86094	0.36	0.04115	0.17 (1.08)	0.24 (1.18)	0.5 (1.25)	0.08 (0.21)	0.18 (0.26)	0.47 (0.32)	-0.1	0.76907	-0.38	0.32539	-0.28	0.4998	0.24	0.1889		-0.48 (1.42)	-0.32 (0.95)	0.05 (1.21)	-0.45 (0.28)	-0.23 (0.16)	0.02 (0.17)	-0.22	0.49318	-0.47
1312	IGHV3-30	IGHV3-30	P01768	310	EMIF-AD MBD	MRM	NA		0	-1	2			0 (1)	-0.03 (1.05)	-0.42 (0.95)	0.01 (0.12)	-0.02 (0.11)	-0.43 (0.08)	0.04	0.82163	0.44	0.00313	0.4	0.00417	-0.13 (0.95)	0.11 (1.28)	-0.01 (0.95)	-0.12 (0.17)	0.11 (0.2)	-0.02 (0.24)	-0.22	0.39948	-0.1	0.73486	0.12	0.69435	0.03	0.8477		-0.49 (1.12)	-0.44 (0.74)	-0.37 (1.09)	-0.5 (0.22)	-0.45 (0.12)	-0.37 (0.13)	-0.06	0.8215	-0.13
1315	IGHV3-43	IGHV3-43	A0A0B4J1X8	255	EMIF-AD MBD	MRM	NA		0	0	0			0 (1)	-0.02 (0.92)	-0.27 (0.92)	-0.03 (0.12)	-0.02 (0.12)	-0.26 (0.09)	-0.01	0.95677	0.22	0.16399	0.23	0.1131	-0.08 (0.96)	-0.15 (0.57)	0.27 (1.16)	-0.1 (0.17)	-0.14 (0.21)	0.27 (0.24)	0.04	0.87632	-0.37	0.20431	-0.41	0.19208	0.13	0.37		-0.55 (0.81)	-0.27 (0.88)	-0.2 (1)	-0.53 (0.24)	-0.27 (0.13)	-0.2 (0.13)	-0.26	0.33827	-0.33
1316	IGHV3-43D	IGHV3-43D	P0DP04	310	EMIF-AD MBD	MRM	NA		0	-1	0			0 (1)	-0.12 (0.97)	-0.4 (1.19)	-0.03 (0.13)	-0.12 (0.12)	-0.39 (0.09)	0.09	0.61647	0.36	0.02896	0.27	0.08239	-0.12 (1.09)	-0.16 (0.73)	-0.06 (1.06)	-0.13 (0.19)	-0.16 (0.23)	-0.07 (0.27)	0.03	0.92438	-0.06	0.8562	-0.09	0.80354	-0.01	0.9328		-0.25 (2.1)	-0.58 (0.87)	-0.25 (1.07)	-0.24 (0.25)	-0.58 (0.14)	-0.25 (0.14)	0.33	0.23744	0.01
1318	IGHV3-49	IGHV3-49	A0A0A0MS15	310	EMIF-AD MBD	MRM	NA		0	0	0			0 (1)	-0.1 (1)	-0.17 (1.01)	-0.03 (0.12)	-0.1 (0.11)	-0.16 (0.08)	0.07	0.68839	0.12	0.40899	0.06	0.6801	-0.22 (0.91)	0.01 (0.96)	-0.01 (1.25)	-0.26 (0.17)	0.01 (0.21)	-0.03 (0.24)	-0.26	0.32404	-0.23	0.44129	0.04	0.91126	0.15	0.3077		0.14 (1.12)	-0.31 (1.02)	-0.13 (0.95)	0.15 (0.22)	-0.28 (0.12)	-0.14 (0.13)	0.42	0.09331	0.29
1320	IGHV3-64	IGHV3-64	A0A075B6Q5	161	EMIF-AD MBD	MRM	NA		0	0	0			0 (1)	-0.07 (0.85)	-0.25 (0.82)	-0.01 (0.14)	-0.08 (0.15)	-0.24 (0.1)	0.07	0.7523	0.23	0.21956	0.16	0.36298	-0.09 (0.91)	0.03 (0.74)	-0.12 (0.88)	-0.09 (0.2)	0.03 (0.29)	-0.13 (0.25)	-0.12	0.73271	0.03	0.91517	0.16	0.683	-0.02	0.9018		0.06 (1.02)	-0.55 (0.85)	-0.07 (0.62)	0.06 (0.23)	-0.55 (0.14)	-0.07 (0.14)	0.61	0.02554	0.14
1321	IGHV3-64D	IGHV3-64D	A0A0J9YX35	310	EMIF-AD MBD	MRM	NA		0	0	0			0 (1)	-0.07 (0.93)	-0.25 (0.9)	-0.01 (0.11)	-0.06 (0.11)	-0.25 (0.08)	0.06	0.71167	0.24	0.08722	0.18	0.1662	-0.15 (1.01)	0.04 (0.76)	-0.04 (1.02)	-0.14 (0.16)	0.04 (0.19)	-0.04 (0.22)	-0.18	0.46636	-0.1	0.70895	0.08	0.79133	0.07	0.6331		-0.39 (1.01)	-0.29 (0.89)	-0.15 (0.88)	-0.4 (0.2)	-0.29 (0.11)	-0.15 (0.12)	-0.11	0.63282	-0.25
1323	IGHV3-7	IGHV3-7	P01780	310	EMIF-AD MBD	MRM	NA		0	-1	2			0 (1)	0 (1.05)	-0.36 (1.04)	0.02 (0.12)	0 (0.12)	-0.37 (0.09)	0.01	0.93261	0.39	0.01303	0.37	0.01155	-0.09 (1.14)	0.08 (0.86)	0.07 (1.14)	-0.07 (0.18)	0.08 (0.21)	0.07 (0.25)	-0.14	0.60708	-0.14	0.65733	0.01	0.98508	0.07	0.6539		-0.38 (1.29)	-0.49 (1.03)	-0.21 (0.95)	-0.39 (0.23)	-0.51 (0.13)	-0.2 (0.13)	0.12	0.65225	-0.19
1324	IGHV3-72	IGHV3-72	A0A0B4J1Y9	310	EMIF-AD MBD	MRM	NA		0	0	2			0 (1)	0.15 (0.9)	-0.36 (1.02)	-0.05 (0.11)	0.15 (0.11)	-0.33 (0.08)	-0.21	0.19776	0.28	0.05941	0.48	0.00057	0 (0.87)	0.28 (0.92)	0.25 (0.96)	-0.04 (0.17)	0.28 (0.2)	0.23 (0.24)	-0.32	0.21979	-0.27	0.34976	0.05	0.87246	0.15	0.2593		-0.18 (1.16)	-0.53 (0.99)	-0.24 (1)	-0.17 (0.21)	-0.49 (0.12)	-0.25 (0.12)	0.32	0.19503	0.08
1326	IGHV3-74	IGHV3-74	A0A0B4J1X5	283	EMIF-AD MBD	MRM	NA		0	-1	2			0 (1)	-0.07 (0.94)	-0.39 (1.05)	0.01 (0.12)	-0.05 (0.12)	-0.4 (0.09)	0.06	0.73457	0.41	0.0099	0.35	0.01902	-0.17 (0.91)	0.02 (1.07)	0.04 (0.85)	-0.13 (0.18)	0.02 (0.22)	0.05 (0.25)	-0.15	0.60357	-0.18	0.56172	-0.03	0.92705	0.11	0.4249		-0.53 (1.47)	-0.37 (0.81)	-0.36 (1.12)	-0.57 (0.23)	-0.38 (0.13)	-0.36 (0.13)	-0.19	0.47593	-0.22
1327	IGHV3-9	IGHV3-9	P01782	310	EMIF-AD MBD	MRM	NA		0	-1	0			0 (1)	-0.12 (0.97)	-0.4 (1.19)	-0.03 (0.13)	-0.12 (0.12)	-0.39 (0.09)	0.09	0.61647	0.36	0.02896	0.27	0.08239	-0.12 (1.09)	-0.16 (0.73)	-0.06 (1.06)	-0.13 (0.19)	-0.16 (0.23)	-0.07 (0.27)	0.03	0.92438	-0.06	0.8562	-0.09	0.80354	-0.01	0.9328		-0.25 (2.1)	-0.58 (0.87)	-0.25 (1.07)	-0.24 (0.25)	-0.58 (0.14)	-0.25 (0.14)	0.33	0.23744	0.01
1328	IGHV4-28	IGHV4-28	A0A0C4DH34	291	EMIF-AD MBD	MRM	NA		0	0	2			0 (1)	0.11 (1.15)	-0.22 (0.93)	0 (0.12)	0.12 (0.12)	-0.23 (0.09)	-0.12	0.47143	0.22	0.15187	0.34	0.02029	0.12 (1.17)	0.09 (0.9)	0.11 (1.47)	0.17 (0.18)	0.08 (0.22)	0.13 (0.26)	0.09	0.76239	0.03	0.91419	-0.05	0.88027	-0.02	0.9275		-0.29 (1.27)	-0.32 (0.85)	-0.1 (0.9)	-0.33 (0.23)	-0.35 (0.13)	-0.09 (0.13)	0.02	0.94216	-0.24
1329	IGHV4-30-2	IGHV4-30-2	A0A087WSY4	289	EMIF-AD MBD	MRM	NA		0	0	0	Increase	Increase	0 (1)	0.04 (0.8)	-0.19 (0.89)	0.01 (0.11)	0.04 (0.11)	-0.2 (0.08)	-0.03	0.82712	0.21	0.13393	0.24	0.0711	-0.16 (0.77)	0.12 (0.74)	0.34 (0.88)	-0.18 (0.15)	0.13 (0.18)	0.34 (0.21)	-0.3	0.20191	-0.51	0.05134	-0.21	0.45817	0.28	0.0223	Increase linear	-0.52 (0.97)	-0.23 (0.89)	-0.05 (0.85)	-0.51 (0.2)	-0.22 (0.11)	-0.06 (0.11)	-0.29	0.19474	-0.45
1330	IGHV4-30-4	IGHV4-30-4	P0DP06	310	EMIF-AD MBD	MRM	NA		0	0	0		Increase	0 (1)	-0.02 (0.86)	-0.06 (1)	0.01 (0.11)	-0.01 (0.11)	-0.07 (0.08)	0.03	0.87374	0.08	0.59114	0.05	0.70011	-0.15 (0.95)	0.08 (0.8)	0.11 (0.77)	-0.11 (0.16)	0.08 (0.19)	0.11 (0.23)	-0.19	0.45847	-0.22	0.43093	-0.03	0.91135	0.12	0.3488		-0.48 (1.09)	-0.1 (0.85)	0.13 (1.09)	-0.5 (0.21)	-0.11 (0.12)	0.13 (0.12)	-0.39	0.10036	-0.64
1331	IGHV4-31	IGHV4-31	P0DP07	297	EMIF-AD MBD	MRM	NA		0	0	0			0 (1)	-0.1 (0.83)	-0.16 (0.79)	0.01 (0.1)	-0.1 (0.1)	-0.17 (0.07)	0.11	0.4511	0.18	0.17045	0.07	0.5684	-0.13 (0.78)	-0.01 (0.83)	-0.17 (0.96)	-0.11 (0.15)	-0.01 (0.17)	-0.17 (0.2)	-0.1	0.65708	0.05	0.83066	0.15	0.55804	-0.02	0.8975		-0.18 (0.89)	-0.14 (0.66)	-0.17 (0.91)	-0.19 (0.18)	-0.14 (0.1)	-0.17 (0.11)	-0.04	0.83357	-0.02
1335	IGHV4-4	IGHV4-4	A0A075B6R2	304	EMIF-AD MBD	MRM	NA		0	0	0			0 (1)	-0.01 (0.94)	-0.04 (0.98)	-0.01 (0.12)	-0.01 (0.11)	-0.03 (0.08)	0	0.98408	0.02	0.91078	0.02	0.8879	-0.17 (0.96)	0.17 (0.85)	0.08 (1)	-0.18 (0.17)	0.17 (0.21)	0.08 (0.24)	-0.35	0.18948	-0.26	0.36673	0.09	0.76994	0.18	0.1975		-0.3 (1.19)	-0.01 (0.89)	0.02 (1.01)	-0.3 (0.21)	0 (0.12)	0.02 (0.12)	-0.3	0.2243	-0.31
1338	IGHV5-10-1	IGHV5-10-1	A0A0J9YXX1	280	EMIF-AD MBD	MRM	NA		0	0	0			0 (1)	0.2 (1.02)	-0.01 (1.21)	-0.07 (0.13)	0.21 (0.14)	0.02 (0.1)	-0.27	0.15699	-0.09	0.606	0.19	0.26994	0.05 (0.91)	0.53 (1.02)	0.04 (1.18)	0 (0.21)	0.53 (0.25)	0.04 (0.3)	-0.52	0.11282	-0.04	0.9211	0.49	0.21787	0.11	0.502		-0.02 (1.48)	0.1 (1.11)	-0.12 (1.25)	-0.05 (0.27)	0.15 (0.14)	-0.14 (0.15)	-0.2	0.51014	0.09
1339	IGHV5-51	IGHV5-51	A0A0C4DH38	310	EMIF-AD MBD	MRM	NA		0	0	2			0 (1)	0.14 (1.01)	-0.17 (1.1)	0.01 (0.12)	0.15 (0.12)	-0.18 (0.09)	-0.14	0.41579	0.19	0.21826	0.33	0.02593	0.06 (0.88)	0.1 (0.84)	0.37 (1.45)	0.1 (0.18)	0.1 (0.22)	0.37 (0.26)	0	0.99788	-0.26	0.40237	-0.27	0.43351	0.14	0.3497		-0.23 (1.46)	-0.29 (0.99)	-0.03 (1.08)	-0.26 (0.23)	-0.3 (0.13)	-0.03 (0.14)	0.04	0.87935	-0.23
1340	IGHV6-1	IGHV6-1	A0A0B4J1U7	310	EMIF-AD MBD	MRM	NA		0	0	2			0 (1)	0.16 (1.14)	-0.19 (1.02)	0.04 (0.12)	0.17 (0.12)	-0.21 (0.09)	-0.13	0.43379	0.25	0.1113	0.38	0.01016	0.19 (1.17)	0.01 (1.17)	0.31 (1.09)	0.25 (0.18)	0.01 (0.22)	0.32 (0.26)	0.24	0.39854	-0.07	0.81734	-0.31	0.35507	-0.02	0.9151		-0.09 (0.98)	-0.13 (0.98)	-0.28 (1.08)	-0.12 (0.23)	-0.16 (0.13)	-0.27 (0.14)	0.04	0.87597	0.15
1342	IGKC	IGKC	P01834	310	EMIF-AD MBD	MRM	NA		0	0	2			0 (1)	0.06 (0.96)	-0.28 (1.07)	0.01 (0.12)	0.07 (0.12)	-0.29 (0.09)	-0.06	0.71486	0.3	0.05128	0.36	0.01343	-0.15 (0.87)	0.22 (1.09)	0.27 (0.9)	-0.12 (0.18)	0.22 (0.21)	0.26 (0.25)	-0.34	0.2175	-0.38	0.2083	-0.04	0.89108	0.22	0.1247		-0.38 (1.53)	-0.41 (0.89)	-0.12 (1.05)	-0.4 (0.23)	-0.41 (0.13)	-0.11 (0.13)	0.02	0.94665	-0.28
1345	IGKV1-13	IGKV1-13	P0DP09	310	EMIF-AD MBD	MRM	NA		0	0	0			0 (1)	-0.11 (1.12)	-0.03 (1)	-0.03 (0.12)	-0.11 (0.12)	-0.01 (0.09)	0.08	0.65279	-0.02	0.90033	-0.1	0.51671	-0.14 (1.04)	-0.03 (0.98)	-0.14 (1.48)	-0.19 (0.18)	-0.03 (0.21)	-0.15 (0.25)	-0.16	0.55752	-0.04	0.89687	0.12	0.70964	0.03	0.8767		-0.14 (1.07)	-0.13 (0.9)	0.13 (1.07)	-0.13 (0.23)	-0.1 (0.13)	0.12 (0.13)	-0.03	0.90268	-0.24
1347	IGKV1-17	IGKV1-17	P01599	201	EMIF-AD MBD	MRM	NA		0	0	0	Increase		0 (1)	-0.03 (1.01)	-0.34 (0.81)	-0.03 (0.14)	-0.04 (0.13)	-0.33 (0.09)	0	0.99055	0.29	0.08487	0.29	0.07321	-0.32 (1.02)	-0.09 (0.87)	0.61 (1.05)	-0.36 (0.2)	-0.09 (0.2)	0.58 (0.27)	-0.27	0.34813	-0.94	0.00607	-0.67	0.05134	0.47	0.0139	Increase linear	-0.18 (1.13)	-0.36 (0.67)	-0.38 (0.82)	-0.15 (0.22)	-0.34 (0.13)	-0.39 (0.13)	0.19	0.45367	0.24
1348	IGKV1-27	IGKV1-27	A0A075B6S5	157	EMIF-AD MBD	MRM	NA		0	-1	0			0 (1)	-0.09 (0.86)	-0.35 (0.92)	0.07 (0.16)	-0.09 (0.15)	-0.39 (0.11)	0.16	0.471	0.46	0.0237	0.3	0.10848	-0.26 (0.91)	0.03 (0.86)	0.03 (0.79)	-0.19 (0.24)	0.03 (0.23)	0.09 (0.37)	-0.21	0.52129	-0.27	0.53695	-0.06	0.89035	0.15	0.4561		-0.45 (1.41)	-0.33 (0.83)	-0.35 (0.88)	-0.54 (0.29)	-0.35 (0.15)	-0.35 (0.16)	-0.19	0.57019	-0.18
1349	IGKV1-33	IGKV1-33	P01594	310	EMIF-AD MBD	MRM	NA		0	0	0			0 (1)	0.01 (0.96)	-0.06 (0.98)	0.06 (0.11)	0.02 (0.11)	-0.1 (0.08)	0.04	0.78177	0.16	0.27368	0.12	0.40146	0.01 (0.97)	0.01 (1.11)	0 (0.76)	0.09 (0.17)	0 (0.2)	0.02 (0.23)	0.09	0.7254	0.08	0.79026	-0.01	0.96229	-0.03	0.8178		-0.06 (1.09)	-0.18 (0.86)	0.08 (1.05)	-0.1 (0.21)	-0.22 (0.12)	0.09 (0.12)	0.13	0.60548	-0.19
1351	IGKV1-5	IGKV1-5	P01602	310	EMIF-AD MBD	MRM	NA		0	0	0			0 (1)	-0.03 (0.81)	-0.12 (0.65)	0.01 (0.09)	-0.03 (0.09)	-0.12 (0.07)	0.04	0.77575	0.13	0.27802	0.09	0.41244	-0.17 (1.01)	0 (0.51)	0.21 (0.66)	-0.16 (0.12)	0 (0.14)	0.21 (0.17)	-0.16	0.39815	-0.37	0.08145	-0.21	0.3583	0.19	0.1184		-0.18 (0.69)	-0.08 (0.57)	-0.14 (0.72)	-0.19 (0.16)	-0.08 (0.09)	-0.14 (0.09)	-0.11	0.54991	-0.05
1352	IGKV1-6	IGKV1-6	A0A0C4DH72	163	EMIF-AD MBD	MRM	NA		0	0	0			0 (1)	-0.3 (1.12)	-0.46 (1.13)	-0.11 (0.19)	-0.28 (0.17)	-0.42 (0.12)	0.18	0.49423	0.32	0.17642	0.14	0.50282	-0.56 (1.12)	-0.19 (1.19)	0.07 (0.94)	-0.58 (0.28)	-0.18 (0.28)	0.03 (0.43)	-0.4	0.32318	-0.61	0.23416	-0.21	0.67898	0.35	0.1388		-0.48 (2.34)	-0.59 (0.85)	-0.33 (0.91)	-0.49 (0.36)	-0.54 (0.19)	-0.36 (0.19)	0.05	0.90931	-0.13
1358	IGKV2-24	IGKV2-24	A0A0C4DH68	310	EMIF-AD MBD	MRM	NA		0	-1	2			0 (1)	0.08 (0.91)	-0.31 (0.91)	0.01 (0.11)	0.08 (0.11)	-0.32 (0.08)	-0.08	0.60375	0.32	0.02034	0.4	0.00241	-0.01 (0.84)	-0.03 (0.94)	0.41 (0.98)	0 (0.16)	-0.03 (0.19)	0.4 (0.22)	0.03	0.908	-0.4	0.13721	-0.43	0.1381	0.19	0.164		-0.33 (1.08)	-0.31 (0.89)	-0.31 (0.89)	-0.35 (0.2)	-0.31 (0.11)	-0.31 (0.12)	-0.04	0.86637	-0.04
1360	IGKV2-29	IGKV2-29	A2NJV5	310	EMIF-AD MBD	MRM	NA		0	0	2			0 (1)	0.1 (1.1)	-0.31 (1.02)	-0.01 (0.12)	0.11 (0.12)	-0.31 (0.09)	-0.12	0.47587	0.3	0.05309	0.42	0.00439	-0.08 (1.01)	0.23 (1.3)	0.31 (0.96)	-0.09 (0.18)	0.23 (0.21)	0.3 (0.25)	-0.32	0.25139	-0.39	0.21094	-0.07	0.83916	0.23	0.151		-0.45 (1.31)	-0.32 (0.81)	-0.25 (1.13)	-0.45 (0.23)	-0.31 (0.13)	-0.25 (0.13)	-0.14	0.59175	-0.2
1363	IGKV2D-26	IGKV2D-26	A0A0A0MRZ7	310	EMIF-AD MBD	MRM	NA		0	0	2			0 (1)	0.1 (1.09)	-0.31 (1.01)	-0.01 (0.12)	0.1 (0.12)	-0.31 (0.09)	-0.11	0.49666	0.3	0.05153	0.41	0.00473	-0.08 (1.01)	0.22 (1.29)	0.3 (0.96)	-0.09 (0.18)	0.22 (0.21)	0.29 (0.25)	-0.31	0.27491	-0.38	0.22054	-0.07	0.82178	0.23	0.1584		-0.45 (1.31)	-0.33 (0.81)	-0.25 (1.11)	-0.45 (0.23)	-0.31 (0.13)	-0.26 (0.13)	-0.14	0.59302	-0.19
1364	IGKV2D-29	IGKV2D-29	A0A075B6S2	310	EMIF-AD MBD	MRM	NA		0	0	2			0 (1)	0.1 (1.1)	-0.31 (1.02)	-0.01 (0.12)	0.11 (0.12)	-0.31 (0.09)	-0.12	0.47587	0.3	0.05309	0.42	0.00439	-0.08 (1.01)	0.23 (1.3)	0.31 (0.96)	-0.09 (0.18)	0.23 (0.21)	0.3 (0.25)	-0.32	0.25139	-0.39	0.21094	-0.07	0.83916	0.23	0.151		-0.45 (1.31)	-0.32 (0.81)	-0.25 (1.13)	-0.45 (0.23)	-0.31 (0.13)	-0.25 (0.13)	-0.14	0.59175	-0.2
1365	IGKV2D-30	IGKV2D-30	A0A075B6S6	310	EMIF-AD MBD	MRM	NA		0	-1	2			0 (1)	0.1 (1.01)	-0.32 (0.98)	0 (0.12)	0.11 (0.11)	-0.32 (0.08)	-0.11	0.49451	0.32	0.03172	0.43	0.00238	-0.06 (0.95)	0.24 (1.24)	0.25 (0.76)	-0.08 (0.17)	0.24 (0.2)	0.24 (0.24)	-0.32	0.23454	-0.31	0.28903	0	0.99124	0.2	0.1831		-0.42 (1.2)	-0.34 (0.85)	-0.27 (1.06)	-0.42 (0.22)	-0.33 (0.12)	-0.28 (0.13)	-0.1	0.69787	-0.15
1366	IGKV3-11	IGKV3-11	P04433	310	EMIF-AD MBD	MRM	NA		0	0	0			0 (1)	-0.08 (1.01)	-0.29 (0.95)	-0.01 (0.11)	-0.07 (0.11)	-0.29 (0.08)	0.06	0.68476	0.29	0.05209	0.22	0.11208	-0.12 (1.02)	-0.08 (0.98)	0.03 (1.07)	-0.1 (0.17)	-0.08 (0.2)	0.04 (0.24)	-0.02	0.94756	-0.14	0.63669	-0.12	0.70008	0.05	0.7487		-0.3 (1.23)	-0.37 (0.89)	-0.2 (0.92)	-0.31 (0.21)	-0.38 (0.12)	-0.2 (0.12)	0.06	0.80348	-0.11
1367	IGKV3-15	IGKV3-15	P01624	290	EMIF-AD MBD	MRM	NA		0	-1	0			0 (1)	-0.18 (1.01)	-0.32 (1.14)	0.02 (0.13)	-0.17 (0.13)	-0.34 (0.09)	0.2	0.27431	0.36	0.02768	0.17	0.29062	-0.2 (0.96)	-0.09 (1.2)	-0.28 (0.85)	-0.15 (0.2)	-0.1 (0.24)	-0.28 (0.27)	-0.05	0.87362	0.13	0.70672	0.18	0.62444	-0.03	0.8448		-0.37 (1.62)	-0.39 (0.94)	-0.23 (1.17)	-0.39 (0.26)	-0.4 (0.14)	-0.23 (0.15)	0.01	0.97181	-0.17
1368	IGKV3-20	IGKV3-20	P01619	310	EMIF-AD MBD	MRM	NA		0	-1	0			0 (1)	-0.12 (1.02)	-0.31 (1.07)	0.01 (0.12)	-0.11 (0.12)	-0.32 (0.09)	0.13	0.45384	0.34	0.02881	0.21	0.14545	-0.11 (0.98)	-0.27 (1.19)	0.08 (0.82)	-0.09 (0.18)	-0.27 (0.21)	0.08 (0.26)	0.19	0.50285	-0.16	0.59854	-0.35	0.29218	0.07	0.6568		-0.43 (1.32)	-0.38 (1.01)	-0.2 (1.03)	-0.46 (0.23)	-0.39 (0.13)	-0.19 (0.13)	-0.07	0.80272	-0.26
1370	IGKV3D-15	IGKV3D-15	A0A087WSY6	306	EMIF-AD MBD	MRM	NA		0	0	0			0 (1)	0.06 (0.76)	0.02 (0.79)	0.03 (0.1)	0.07 (0.1)	0 (0.07)	-0.03	0.80291	0.03	0.78903	0.07	0.56902	0.13 (0.63)	0.12 (0.67)	-0.17 (1.06)	0.15 (0.14)	0.11 (0.16)	-0.17 (0.19)	0.03	0.88072	0.32	0.17195	0.29	0.24641	-0.16	0.1632		0.16 (1.02)	-0.03 (0.74)	0.02 (0.77)	0.14 (0.17)	-0.03 (0.1)	0.02 (0.1)	0.17	0.37557	0.13
1371	IGKV3D-20	IGKV3D-20	A0A0C4DH25	310	EMIF-AD MBD	MRM	NA		0	0	2			0 (1)	0.06 (1)	-0.24 (1.11)	0.01 (0.12)	0.07 (0.12)	-0.25 (0.09)	-0.06	0.7326	0.25	0.10912	0.31	0.03746	0 (0.91)	0.04 (1.15)	0.22 (1.02)	0.02 (0.18)	0.03 (0.22)	0.22 (0.26)	-0.01	0.97121	-0.2	0.53513	-0.19	0.58365	0.08	0.5786		-0.17 (1.54)	-0.37 (0.98)	-0.12 (1.06)	-0.19 (0.24)	-0.38 (0.13)	-0.12 (0.14)	0.19	0.48253	-0.07
1373	IGKV4-1	IGKV4-1	P06312	305	EMIF-AD MBD	MRM	NA		0	-1	2			0 (1)	-0.05 (0.84)	-0.35 (0.86)	-0.04 (0.1)	-0.05 (0.1)	-0.32 (0.08)	0.01	0.95075	0.28	0.04078	0.27	0.03692	-0.07 (0.82)	-0.09 (0.82)	0.02 (0.93)	-0.11 (0.15)	-0.09 (0.18)	0.01 (0.21)	-0.02	0.92151	-0.12	0.63916	-0.1	0.72165	0.04	0.7226		-0.41 (0.79)	-0.43 (0.76)	-0.24 (0.99)	-0.39 (0.19)	-0.4 (0.11)	-0.25 (0.11)	0.01	0.96832	-0.15
1374	IGKV6-21	IGKV6-21	A0A0C4DH24	106	EMIF-AD MBD	MRM	NA		0	-1	0			0 (1)	-0.19 (0.93)	-0.56 (0.63)	-0.06 (0.16)	-0.21 (0.16)	-0.51 (0.12)	0.15	0.50454	0.46	0.03494	0.31	0.13106	0.02 (1.2)	-0.23 (0.79)	-0.45 (0.61)	0.01 (0.25)	-0.25 (0.27)	-0.41 (0.27)	0.25	0.48499	0.42	0.27524	0.17	0.67178	-0.27	0.2998		-0.65 (0.57)	-0.48 (0.5)	-0.61 (0.78)	-0.67 (0.29)	-0.47 (0.16)	-0.61 (0.17)	-0.2	0.55006	-0.06
1375	IGKV6D-21	IGKV6D-21	A0A0A0MT36	119	EMIF-AD MBD	MRM	NA		0	0	0			0 (1)	0.25 (1.23)	-0.13 (1.01)	-0.17 (0.2)	0.3 (0.2)	-0.05 (0.14)	-0.48	0.09816	-0.12	0.64352	0.36	0.13581	0.02 (0.78)	0.82 (1.75)	-0.23 (0.62)	-0.07 (0.3)	0.87 (0.34)	-0.17 (0.43)	-0.95	0.0392	0.1	0.85701	1.04	0.06139	0.14	0.6648		0.52 (2.22)	-0.33 (0.64)	-0.07 (0.88)	0.48 (0.43)	-0.25 (0.21)	-0.14 (0.22)	0.73	0.13572	0.61
1376	IGLC1	IGLC1	P0CG04	310	EMIF-AD MBD	MRM	NA		0	0	2			0 (1)	0.16 (1.11)	-0.16 (0.92)	0 (0.11)	0.17 (0.11)	-0.16 (0.08)	-0.17	0.28505	0.16	0.2583	0.33	0.01588	-0.05 (1.01)	0.42 (1.27)	0.23 (1.02)	0 (0.17)	0.41 (0.2)	0.22 (0.23)	-0.41	0.11568	-0.22	0.44164	0.19	0.54319	0.14	0.3998		-0.25 (1.13)	-0.19 (0.83)	-0.09 (0.95)	-0.29 (0.21)	-0.21 (0.12)	-0.09 (0.12)	-0.08	0.74089	-0.2
1377	IGLC2	IGLC2	P0DOY2	310	EMIF-AD MBD	MRM	NA		0	-1	2			0 (1)	0.1 (0.98)	-0.28 (1)	0.02 (0.12)	0.11 (0.11)	-0.3 (0.08)	-0.09	0.56111	0.32	0.03383	0.41	0.00377	0.04 (1.08)	0.23 (0.83)	0.05 (1.02)	0.1 (0.17)	0.23 (0.2)	0.05 (0.24)	-0.13	0.62584	0.04	0.8868	0.17	0.58742	-0.01	0.9571		-0.23 (1.52)	-0.31 (0.91)	-0.27 (0.89)	-0.26 (0.22)	-0.33 (0.12)	-0.26 (0.13)	0.07	0.78314	0
1378	IGLC3	IGLC3	P0DOY3	310	EMIF-AD MBD	MRM	NA		0	-1	2			0 (1)	0.1 (0.98)	-0.28 (1)	0.02 (0.12)	0.11 (0.11)	-0.3 (0.08)	-0.09	0.56111	0.32	0.03383	0.41	0.00377	0.04 (1.08)	0.23 (0.83)	0.05 (1.02)	0.1 (0.17)	0.23 (0.2)	0.05 (0.24)	-0.13	0.62584	0.04	0.8868	0.17	0.58742	-0.01	0.9571		-0.23 (1.52)	-0.31 (0.91)	-0.27 (0.89)	-0.26 (0.22)	-0.33 (0.12)	-0.26 (0.13)	0.07	0.78314	0
1380	IGLC7	IGLC7	A0M8Q6	310	EMIF-AD MBD	MRM	NA		0	0	0			0 (1)	-0.02 (0.87)	-0.14 (0.9)	-0.04 (0.11)	-0.02 (0.1)	-0.12 (0.08)	-0.02	0.89954	0.09	0.52614	0.11	0.41549	0.08 (0.91)	-0.02 (0.84)	-0.23 (0.85)	0.04 (0.15)	-0.02 (0.18)	-0.24 (0.22)	0.06	0.80186	0.28	0.28346	0.22	0.42955	-0.13	0.3079		-0.44 (1.04)	-0.04 (0.83)	-0.15 (0.91)	-0.43 (0.19)	-0.01 (0.11)	-0.16 (0.11)	-0.41	0.0651	-0.26
1381	IGLL1	IGLL1	P15814	305	EMIF-AD MBD	MRM	NA		0	0	0			0 (1)	-0.1 (0.92)	-0.31 (1)	-0.05 (0.12)	-0.1 (0.11)	-0.28 (0.08)	0.04	0.78325	0.23	0.12285	0.19	0.19018	-0.02 (0.82)	0 (0.95)	-0.4 (1.06)	-0.05 (0.17)	0.01 (0.2)	-0.41 (0.24)	-0.05	0.83898	0.36	0.21454	0.42	0.18605	-0.16	0.2552		-0.55 (1.19)	-0.32 (0.92)	-0.22 (1.02)	-0.54 (0.21)	-0.31 (0.12)	-0.23 (0.13)	-0.23	0.34487	-0.31
1382	IGLL5	IGLL5	B9A064	310	EMIF-AD MBD	MRM	NA		0	0	2			0 (1)	0.18 (1.12)	-0.15 (0.94)	0 (0.11)	0.19 (0.11)	-0.15 (0.08)	-0.19	0.23563	0.15	0.30961	0.34	0.01531	-0.04 (1.02)	0.44 (1.31)	0.26 (1.02)	0.01 (0.17)	0.44 (0.2)	0.25 (0.24)	-0.43	0.10502	-0.24	0.41037	0.19	0.54965	0.15	0.3717		-0.25 (1.16)	-0.19 (0.85)	-0.06 (0.97)	-0.29 (0.22)	-0.2 (0.12)	-0.06 (0.13)	-0.08	0.73349	-0.23
1383	IGLON5	IGLON5	A6NGN9	310	EMIF-AD MBD	MRM	NA		-1	0	1			0 (1)	-0.44 (0.89)	0.21 (0.74)	-0.02 (0.1)	-0.45 (0.1)	0.22 (0.07)	0.43	0.0022	-0.25	0.05329	-0.67	0	-0.34 (0.84)	-0.4 (0.73)	-0.73 (1.17)	-0.39 (0.13)	-0.39 (0.16)	-0.74 (0.19)	0	0.99112	0.35	0.13413	0.35	0.15952	-0.15	0.2462		0.37 (0.81)	0.25 (0.71)	0.1 (0.74)	0.4 (0.17)	0.28 (0.1)	0.09 (0.1)	0.12	0.55636	0.31
1384	IGLV1-36	IGLV1-36	A0A0B4J1U3	300	EMIF-AD MBD	MRM	NA		0	1	0			0 (1)	0.11 (1.07)	0.18 (1.04)	-0.11 (0.12)	0.11 (0.12)	0.24 (0.09)	-0.22	0.19287	-0.35	0.02468	-0.13	0.3937	0.14 (1.21)	0.04 (1.07)	0.15 (0.8)	0.08 (0.19)	0.03 (0.22)	0.13 (0.26)	0.05	0.8668	-0.05	0.87604	-0.1	0.77386	0.02	0.9263		0.01 (1.07)	0.15 (1.09)	0.27 (0.98)	0.03 (0.23)	0.2 (0.13)	0.25 (0.14)	-0.18	0.50663	-0.23
1385	IGLV1-40	IGLV1-40	P01703	114	EMIF-AD MBD	MRM	NA		0	0	0			0 (1)	0.56 (1.49)	0.19 (0.88)	0.02 (0.2)	0.56 (0.21)	0.18 (0.15)	-0.53	0.07205	-0.16	0.53095	0.37	0.15086	0.21 (2.01)	0.67 (1.04)	0.82 (1.33)	0.23 (0.39)	0.64 (0.38)	0.84 (0.4)	-0.41	0.46375	-0.6	0.2822	-0.19	0.73026	0.32	0.4159		0.17 (0.82)	0.33 (0.44)	0.12 (1.08)	0.14 (0.41)	0.34 (0.27)	0.12 (0.21)	-0.2	0.68583	0.02
1386	IGLV1-44	IGLV1-44	P01699	246	EMIF-AD MBD	MRM	NA		0	0	0			0 (1)	-0.06 (0.88)	-0.13 (0.94)	0.02 (0.12)	-0.05 (0.12)	-0.15 (0.09)	0.08	0.66557	0.17	0.28084	0.09	0.54175	-0.11 (1.02)	-0.17 (0.7)	0.18 (0.86)	-0.09 (0.19)	-0.15 (0.21)	0.17 (0.26)	0.06	0.83475	-0.26	0.40872	-0.32	0.3341	0.15	0.3342		-0.29 (1.14)	-0.07 (0.91)	-0.13 (0.9)	-0.3 (0.22)	-0.07 (0.13)	-0.14 (0.13)	-0.23	0.36264	-0.16
1387	IGLV1-47	IGLV1-47	P01700	303	EMIF-AD MBD	MRM	NA		0	0	0			0 (1)	0.01 (0.93)	-0.2 (0.98)	0 (0.12)	0.02 (0.11)	-0.2 (0.08)	-0.02	0.87809	0.19	0.19158	0.22	0.1207	0 (1.07)	0.14 (0.79)	-0.15 (0.79)	0 (0.17)	0.15 (0.2)	-0.15 (0.24)	-0.14	0.58529	0.16	0.58955	0.3	0.34177	-0.02	0.884		-0.46 (1.38)	-0.16 (0.86)	-0.15 (0.95)	-0.47 (0.21)	-0.15 (0.12)	-0.15 (0.12)	-0.32	0.1947	-0.32
1388	IGLV1-51	IGLV1-51	P01701	306	EMIF-AD MBD	MRM	NA		0	0	0			0 (1)	-0.03 (0.68)	-0.15 (0.64)	0 (0.09)	-0.03 (0.09)	-0.15 (0.07)	0.04	0.77727	0.15	0.18691	0.12	0.28692	-0.09 (0.64)	-0.01 (0.64)	0.05 (0.84)	-0.07 (0.11)	-0.01 (0.13)	0.05 (0.16)	-0.06	0.74494	-0.12	0.54607	-0.06	0.77118	0.05	0.5975		-0.14 (0.59)	-0.13 (0.67)	-0.16 (0.64)	-0.16 (0.14)	-0.14 (0.08)	-0.16 (0.08)	-0.01	0.93614	0
1390	IGLV2-11	IGLV2-11	P01706	209	EMIF-AD MBD	MRM	NA		0	0	0			0 (1)	-0.33 (0.78)	-0.38 (0.88)	-0.07 (0.12)	-0.31 (0.13)	-0.35 (0.09)	0.24	0.16619	0.28	0.07946	0.04	0.81226	-0.26 (0.75)	-0.45 (0.76)	-0.27 (0.9)	-0.31 (0.19)	-0.41 (0.21)	-0.32 (0.25)	0.1	0.73202	0.01	0.9796	-0.09	0.78383	-0.01	0.9548		-0.56 (0.62)	-0.35 (1)	-0.35 (0.85)	-0.57 (0.22)	-0.33 (0.13)	-0.35 (0.13)	-0.23	0.36473	-0.22
1391	IGLV2-14	IGLV2-14	P01704	119	EMIF-AD MBD	MRM	NA		0	0	0	Increase		0 (1)	-0.29 (0.91)	-0.24 (0.76)	-0.03 (0.19)	-0.29 (0.16)	-0.23 (0.1)	0.26	0.29166	0.2	0.3567	-0.06	0.76381	-0.52 (0.98)	-0.56 (0.57)	0.59 (0.78)	-0.53 (0.24)	-0.56 (0.25)	0.58 (0.32)	0.03	0.92732	-1.11	0.00593	-1.14	0.00584	0.51	0.0202	Increase linear	-0.11 (0.88)	-0.11 (0.67)	-0.41 (0.79)	-0.11 (0.27)	-0.1 (0.14)	-0.41 (0.14)	-0.01	0.97631	0.3
1394	IGLV2-8	IGLV2-8	P01709	298	EMIF-AD MBD	MRM	NA		0	0	2			0 (1)	0.07 (1.12)	-0.31 (1.18)	-0.04 (0.13)	0.07 (0.13)	-0.3 (0.09)	-0.11	0.53563	0.26	0.12882	0.37	0.02094	0.19 (1.01)	-0.04 (1.11)	-0.04 (1.4)	0.19 (0.2)	-0.04 (0.25)	-0.05 (0.28)	0.23	0.47466	0.24	0.48959	0.01	0.98104	-0.11	0.5231		-0.49 (1.16)	-0.33 (0.91)	-0.24 (1.42)	-0.51 (0.26)	-0.32 (0.15)	-0.24 (0.15)	-0.19	0.514	-0.27
1395	IGLV3-1	IGLV3-1	P01715	298	EMIF-AD MBD	MRM	NA		0	0	0			0 (1)	-0.04 (0.89)	-0.13 (0.83)	0 (0.11)	-0.03 (0.1)	-0.13 (0.08)	0.04	0.79994	0.13	0.3222	0.1	0.4545	-0.06 (0.87)	0.17 (0.68)	-0.31 (1.16)	-0.05 (0.15)	0.17 (0.17)	-0.31 (0.21)	-0.22	0.32825	0.26	0.31576	0.48	0.07869	-0.09	0.5008		-0.38 (0.95)	-0.15 (0.87)	-0.02 (0.72)	-0.38 (0.19)	-0.15 (0.11)	-0.02 (0.11)	-0.23	0.28306	-0.36
1396	IGLV3-10	IGLV3-10	A0A075B6K4	310	EMIF-AD MBD	MRM	NA		0	0	0			0 (1)	0.02 (1.01)	-0.21 (0.89)	0.02 (0.11)	0.03 (0.11)	-0.22 (0.08)	-0.01	0.93013	0.24	0.09595	0.25	0.06318	0.08 (1.11)	0.15 (0.66)	-0.27 (1.18)	0.11 (0.16)	0.14 (0.19)	-0.27 (0.23)	-0.04	0.88352	0.38	0.17075	0.41	0.16147	-0.2	0.1782		-0.45 (0.87)	-0.2 (0.9)	-0.13 (0.88)	-0.47 (0.2)	-0.21 (0.12)	-0.13 (0.12)	-0.26	0.26982	-0.34
1397	IGLV3-12	IGLV3-12	A0A075B6K2	305	EMIF-AD MBD	MRM	NA		0	0	0			0 (1)	0.02 (1.15)	-0.15 (1.3)	-0.1 (0.14)	0.02 (0.14)	-0.09 (0.1)	-0.12	0.5402	0	0.99134	0.12	0.48803	-0.06 (1.26)	-0.02 (1.13)	0.26 (0.96)	-0.13 (0.22)	-0.02 (0.25)	0.22 (0.3)	-0.11	0.74148	-0.35	0.34105	-0.24	0.53934	0.2	0.2457		-0.35 (1.17)	-0.03 (1.18)	-0.2 (1.47)	-0.34 (0.27)	0.02 (0.15)	-0.21 (0.16)	-0.37	0.23981	-0.13
1398	IGLV3-16	IGLV3-16	A0A075B6K0	310	EMIF-AD MBD	MRM	NA		0	0	0			0 (1)	-0.03 (0.93)	-0.07 (1.03)	0 (0.12)	-0.03 (0.11)	-0.07 (0.08)	0.03	0.8361	0.08	0.61007	0.04	0.76314	-0.01 (1.01)	-0.1 (0.86)	0.01 (0.91)	0.01 (0.17)	-0.1 (0.2)	0.01 (0.24)	0.11	0.68117	0	0.99825	-0.11	0.72824	-0.03	0.8253		-0.27 (1.21)	-0.03 (1.01)	-0.04 (0.99)	-0.28 (0.22)	-0.04 (0.12)	-0.04 (0.13)	-0.24	0.32995	-0.24
1399	IGLV3-19	IGLV3-19	P01714	310	EMIF-AD MBD	MRM	NA		0	0	0			0 (1)	0.07 (0.8)	-0.06 (0.96)	0.03 (0.11)	0.07 (0.11)	-0.09 (0.08)	-0.04	0.78519	0.12	0.39653	0.16	0.22725	-0.11 (0.7)	0.13 (0.9)	0.35 (0.81)	-0.09 (0.16)	0.12 (0.19)	0.36 (0.22)	-0.22	0.37493	-0.45	0.09868	-0.23	0.42518	0.2	0.0907		-0.35 (1.28)	-0.11 (0.9)	0.08 (0.9)	-0.36 (0.2)	-0.11 (0.11)	0.08 (0.12)	-0.24	0.28731	-0.44
1403	IGLV3-27	IGLV3-27	P01718	292	EMIF-AD MBD	MRM	NA		0	0	0			0 (1)	-0.27 (1.05)	-0.2 (1.35)	-0.06 (0.15)	-0.27 (0.14)	-0.17 (0.1)	0.21	0.30841	0.1	0.58303	-0.1	0.55076	-0.22 (1.12)	-0.16 (0.99)	-0.52 (0.99)	-0.24 (0.22)	-0.16 (0.27)	-0.54 (0.32)	-0.08	0.81798	0.3	0.43434	0.38	0.36042	-0.14	0.3867		-0.04 (2.4)	-0.33 (1.06)	-0.12 (1.14)	-0.04 (0.28)	-0.3 (0.16)	-0.13 (0.17)	0.26	0.41642	0.09
1404	IGLV3-9	IGLV3-9	A0A075B6K5	310	EMIF-AD MBD	MRM	NA		0	0	0			0 (1)	-0.08 (1.07)	-0.21 (1.2)	-0.08 (0.13)	-0.07 (0.13)	-0.16 (0.09)	-0.01	0.9735	0.08	0.61046	0.09	0.56448	-0.19 (1.11)	-0.09 (1.08)	0.18 (1)	-0.23 (0.2)	-0.09 (0.24)	0.15 (0.28)	-0.13	0.66591	-0.38	0.26538	-0.25	0.49862	0.2	0.2044		-0.41 (1.14)	-0.13 (1.11)	-0.22 (1.33)	-0.41 (0.25)	-0.09 (0.14)	-0.23 (0.15)	-0.32	0.27144	-0.17
1407	IGLV4-69	IGLV4-69	A0A075B6H9	131	EMIF-AD MBD	MRM	NA		0	0	0			0 (1)	-0.17 (1.23)	-0.36 (1.35)	-0.06 (0.22)	-0.17 (0.21)	-0.33 (0.17)	0.11	0.71392	0.27	0.35343	0.16	0.54855	-0.38 (1.37)	0.13 (1.23)	0.04 (0.31)	-0.38 (0.31)	0.15 (0.41)	0.04 (0.6)	-0.53	0.29175	-0.42	0.5282	0.11	0.87625	0.28	0.3373		-0.61 (1.29)	-0.48 (1.21)	-0.16 (1.5)	-0.61 (0.45)	-0.47 (0.27)	-0.18 (0.27)	-0.15	0.77963	-0.43
1411	IGLV7-46	IGLV7-46	A0A075B6I9	309	EMIF-AD MBD	MRM	NA		0	0	2			0 (1)	0.2 (1.04)	-0.21 (1.12)	-0.02 (0.12)	0.21 (0.12)	-0.2 (0.09)	-0.24	0.17145	0.17	0.27491	0.41	0.00678	0.06 (1.01)	0.42 (1.11)	0.21 (0.99)	0.08 (0.19)	0.42 (0.22)	0.2 (0.27)	-0.33	0.25342	-0.12	0.71389	0.22	0.53569	0.11	0.494		-0.18 (1.1)	-0.29 (1.2)	-0.12 (1.06)	-0.2 (0.24)	-0.29 (0.14)	-0.12 (0.14)	0.1	0.72698	-0.07
1412	IGLV8-61	IGLV8-61	A0A075B6I0	299	EMIF-AD MBD	MRM	NA		0	0	2			0 (1)	0.14 (0.85)	-0.21 (1.17)	-0.01 (0.12)	0.14 (0.12)	-0.21 (0.09)	-0.16	0.36091	0.19	0.23477	0.35	0.02221	-0.06 (0.92)	0.33 (0.82)	0.32 (0.64)	-0.11 (0.19)	0.33 (0.22)	0.3 (0.26)	-0.44	0.13638	-0.41	0.20245	0.03	0.93355	0.23	0.0741		-0.37 (1.37)	-0.13 (1)	-0.24 (1.28)	-0.35 (0.23)	-0.1 (0.14)	-0.26 (0.14)	-0.26	0.33525	-0.1
1413	IGLV9-49	IGLV9-49	A0A0B4J1Y8	310	EMIF-AD MBD	MRM	NA		0	0	0			0 (1)	-0.02 (1.34)	-0.22 (1.16)	0 (0.14)	-0.01 (0.13)	-0.23 (0.1)	0.01	0.93987	0.23	0.19154	0.21	0.19595	0.04 (1.71)	0.16 (0.83)	-0.4 (0.93)	0.06 (0.21)	0.16 (0.25)	-0.41 (0.3)	-0.1	0.76869	0.47	0.18959	0.57	0.14175	-0.22	0.271		-0.24 (1.19)	-0.13 (1.17)	-0.32 (1.15)	-0.27 (0.27)	-0.13 (0.15)	-0.32 (0.15)	-0.14	0.64099	0.05
1414	IGSF1	IGSF1	Q8N6C5	134	EMIF-AD MBD	MRM	NA		0	0	1			0 (1)	-0.35 (0.61)	0.13 (0.78)	-0.05 (0.14)	-0.35 (0.15)	0.16 (0.11)	0.31	0.12713	-0.21	0.26715	-0.52	0.00628	-0.19 (0.52)	-0.57 (0.81)	-0.38 (0.47)	-0.26 (0.2)	-0.59 (0.24)	-0.42 (0.26)	0.33	0.29216	0.16	0.61235	-0.17	0.64091	-0.05	0.6896		0.14 (0.83)	0.01 (0.7)	0.25 (0.85)	0.16 (0.26)	0.07 (0.15)	0.24 (0.14)	0.1	0.75253	-0.07
1416	IGSF21	IGSF21	Q96ID5	310	EMIF-AD MBD	MRM	NA		-1	1	1	Decrease	Decrease	0 (1)	-0.47 (0.94)	0.26 (0.77)	-0.02 (0.1)	-0.48 (0.1)	0.28 (0.07)	0.46	0.0013	-0.3	0.02361	-0.76	0	-0.27 (0.81)	-0.54 (0.92)	-0.8 (1.16)	-0.33 (0.14)	-0.54 (0.17)	-0.81 (0.2)	0.21	0.33459	0.48	0.04855	0.27	0.30099	-0.25	0.0713	Decrease non-linear	0.48 (0.8)	0.31 (0.69)	0.14 (0.83)	0.51 (0.18)	0.34 (0.1)	0.13 (0.1)	0.17	0.39851	0.38
1417	IGSF8	IGSF8	Q969P0	249	ADNI	MRM	1	2	-1	1	1		Decrease	0 (0.96)	-0.6 (1.03)	0.51 (1.04)	-0.04 (0.14)	-0.67 (0.1)	0.5 (0.09)	0.64	0.00023	-0.54	0.00105	-1.17	0	-0.49 (0.99)	-0.58 (1.05)	-0.74 (1.06)	-0.44 (0.21)	-0.7 (0.15)	-0.85 (0.21)	0.26	0.31292	0.41	0.17132	0.15	0.55768	-0.18	0.2573		1.06 (0.85)	0.61 (0.96)	0.2 (1.14)	0.8 (0.28)	0.6 (0.12)	0.24 (0.15)	0.19	0.52124	0.56
1418	IGSF8	IGSF8	Q969P0	310	EMIF-AD MBD	MRM	NA	1	-1	1	1			0 (1)	-0.31 (0.97)	0.33 (0.79)	-0.01 (0.1)	-0.31 (0.1)	0.34 (0.08)	0.31	0.03566	-0.34	0.0107	-0.65	0	-0.27 (0.93)	-0.33 (0.92)	-0.36 (1.15)	-0.31 (0.15)	-0.33 (0.18)	-0.37 (0.21)	0.02	0.92757	0.06	0.8057	0.04	0.87842	-0.06	0.6782		0.39 (0.92)	0.38 (0.78)	0.26 (0.77)	0.41 (0.19)	0.4 (0.11)	0.26 (0.11)	0.01	0.96544	0.15
1419	IL16	IL16	Q14005	270	ADNI	RBM	0		0	0	1	Decrease		0 (1)	-0.18 (1.02)	0.1 (0.82)	-0.02 (0.12)	-0.22 (0.09)	0.09 (0.08)	0.2	0.19102	-0.11	0.43854	-0.32	0.01052	-0.04 (0.97)	-0.1 (1.09)	-0.48 (0.89)	-0.02 (0.19)	-0.17 (0.13)	-0.54 (0.18)	0.15	0.50024	0.52	0.04886	0.37	0.09619	-0.28	0.0638	Decrease non-linear	0.55 (0.56)	0.08 (0.84)	0 (0.82)	0.38 (0.25)	0.08 (0.11)	0.02 (0.13)	0.3	0.27656	0.36
1420	IL18BP	IL18BP	O95998	249	ADNI	MRM	0	2	-1	1	1			0 (1)	-0.42 (1.23)	0.62 (1.16)	-0.04 (0.15)	-0.48 (0.12)	0.62 (0.1)	0.44	0.02263	-0.66	0.00033	-1.1	0	-0.18 (1.18)	-0.45 (1.27)	-0.56 (1.23)	-0.14 (0.24)	-0.57 (0.17)	-0.65 (0.24)	0.43	0.15178	0.51	0.13712	0.08	0.7726	-0.2	0.2842		1.17 (0.75)	0.71 (1.12)	0.32 (1.24)	0.87 (0.32)	0.72 (0.14)	0.37 (0.17)	0.15	0.6728	0.5
1421	IL18BP	IL18BP	O95998	310	EMIF-AD MBD	MRM	NA	1	-1	1	1			0 (1)	-0.23 (0.79)	0.47 (0.73)	0.07 (0.1)	-0.23 (0.09)	0.43 (0.07)	0.3	0.02274	-0.36	0.00368	-0.66	0	-0.17 (0.87)	-0.28 (0.76)	-0.29 (0.7)	-0.14 (0.13)	-0.28 (0.15)	-0.27 (0.18)	0.14	0.47239	0.13	0.54469	-0.01	0.9686	-0.08	0.4838		0.72 (0.7)	0.46 (0.74)	0.39 (0.71)	0.71 (0.16)	0.43 (0.09)	0.4 (0.09)	0.28	0.13361	0.32
1422	IL1RAP	IL1RAP	Q9NPH3	310	EMIF-AD MBD	MRM	NA		0	0	0			0 (1)	0.26 (1)	0.13 (0.93)	-0.02 (0.11)	0.26 (0.11)	0.15 (0.08)	-0.28	0.07409	-0.17	0.23366	0.11	0.42661	0.15 (1.05)	0.26 (0.97)	0.49 (0.96)	0.11 (0.16)	0.27 (0.19)	0.49 (0.23)	-0.16	0.53487	-0.38	0.17689	-0.22	0.45962	0.18	0.2193		-0.21 (0.8)	0.18 (0.97)	0.19 (0.92)	-0.19 (0.21)	0.2 (0.12)	0.19 (0.12)	-0.39	0.10107	-0.37
1423	IL1RAPL1	IL1RAPL1	Q9NZN1	195	EMIF-AD MBD	MRM	NA		-1	0	1		Decrease	0 (1)	-0.56 (1)	0.15 (0.88)	-0.02 (0.14)	-0.56 (0.15)	0.16 (0.09)	0.54	0.00773	-0.18	0.31064	-0.72	6e-05	-0.51 (0.91)	-0.45 (1.09)	-0.72 (1.16)	-0.5 (0.2)	-0.46 (0.33)	-0.72 (0.27)	-0.04	0.91598	0.22	0.5176	0.26	0.54223	-0.09	0.6482		0.46 (0.94)	0.22 (0.79)	-0.05 (0.94)	0.47 (0.23)	0.21 (0.14)	-0.05 (0.14)	0.26	0.31971	0.52
1424	IL25	IL25	Q9H293	270	ADNI	RBM	0		0	0	0			0 (1)	-0.11 (1.02)	-0.01 (0.85)	-0.02 (0.13)	-0.12 (0.1)	-0.01 (0.08)	0.11	0.49712	-0.01	0.96688	-0.12	0.36658	-0.16 (1.01)	-0.08 (1.13)	-0.1 (0.82)	-0.16 (0.2)	-0.1 (0.14)	-0.11 (0.19)	-0.06	0.80034	-0.05	0.84976	0.01	0.97237	0.05	0.7665		0.22 (0.8)	0 (0.83)	-0.09 (0.9)	0.13 (0.27)	0.01 (0.11)	-0.08 (0.14)	0.12	0.68859	0.21
1425	IL3	IL3	P08700	270	ADNI	RBM	0		-1	0	1	Decrease		0 (1)	-0.46 (1.01)	-0.02 (0.86)	-0.02 (0.12)	-0.5 (0.1)	-0.03 (0.08)	0.48	0.00251	0.01	0.96577	-0.47	0.00019	-0.14 (0.64)	-0.53 (1.09)	-0.63 (1.1)	-0.13 (0.19)	-0.59 (0.13)	-0.68 (0.19)	0.46	0.04693	0.55	0.04125	0.09	0.69578	-0.22	0.1393	Decrease non-linear	0.25 (0.99)	-0.02 (0.84)	-0.11 (0.87)	0.08 (0.26)	-0.02 (0.11)	-0.08 (0.14)	0.1	0.72981	0.16
1426	IL6R	IL6R	P08887	270	ADNI	RBM	0		-1	1	1		Decrease	0 (1)	-0.44 (0.95)	0.29 (0.9)	-0.02 (0.13)	-0.47 (0.1)	0.29 (0.08)	0.45	0.00473	-0.3	0.0456	-0.75	0	-0.33 (0.87)	-0.42 (1)	-0.6 (0.93)	-0.32 (0.19)	-0.46 (0.13)	-0.63 (0.19)	0.14	0.55964	0.31	0.25789	0.17	0.45241	-0.14	0.3183		0.71 (0.62)	0.36 (0.95)	0.05 (0.82)	0.59 (0.26)	0.36 (0.11)	0.07 (0.14)	0.24	0.4074	0.53
1428	IL6ST	IL6ST	P40189	310	EMIF-AD MBD	MRM	NA		-1	1	1			0 (1)	-0.4 (0.89)	0.33 (0.74)	-0.03 (0.1)	-0.41 (0.1)	0.35 (0.07)	0.38	0.00576	-0.38	0.00271	-0.76	0	-0.18 (0.74)	-0.55 (0.95)	-0.67 (1)	-0.23 (0.13)	-0.55 (0.16)	-0.68 (0.19)	0.31	0.13177	0.45	0.0543	0.13	0.59495	-0.24	0.0606		0.52 (0.77)	0.34 (0.7)	0.25 (0.76)	0.55 (0.17)	0.37 (0.1)	0.24 (0.1)	0.19	0.34002	0.31
1429	IMPA1	IMPA1	P29218	293	EMIF-AD MBD	MRM	NA		-1	1	1	Decrease		0 (1)	-0.38 (1.03)	0.67 (0.92)	0 (0.12)	-0.38 (0.11)	0.67 (0.08)	0.38	0.01957	-0.67	1e-05	-1.05	0	-0.1 (0.77)	-0.46 (1.09)	-0.8 (1.25)	-0.11 (0.17)	-0.46 (0.2)	-0.8 (0.23)	0.35	0.18058	0.69	0.0171	0.34	0.26233	-0.36	0.0186	Decrease linear	0.67 (0.97)	0.67 (0.92)	0.68 (0.92)	0.68 (0.22)	0.67 (0.12)	0.68 (0.12)	0	0.98803	0
1430	IMPAD1	IMPAD1	Q9NX62	310	EMIF-AD MBD	MRM	NA		-1	1	1	Decrease	Decrease	0 (1)	-0.6 (0.93)	0.37 (0.74)	-0.04 (0.1)	-0.61 (0.1)	0.39 (0.07)	0.57	6e-05	-0.43	0.00098	-1	0	-0.32 (0.8)	-0.78 (0.89)	-0.94 (1.09)	-0.36 (0.14)	-0.78 (0.16)	-0.95 (0.19)	0.42	0.05058	0.58	0.01356	0.17	0.50468	-0.33	0.0148	Decrease linear	0.55 (0.78)	0.43 (0.67)	0.24 (0.78)	0.56 (0.17)	0.45 (0.1)	0.24 (0.1)	0.11	0.58923	0.33
1433	ING2	ING2	Q9H160	170	EMIF-AD MBD	MRM	NA		1	0	2	Increase		0 (1)	0.42 (1.06)	0 (0.92)	-0.03 (0.16)	0.4 (0.14)	0.02 (0.11)	-0.43	0.04324	-0.05	0.79971	0.38	0.03633	0.02 (0.82)	0.66 (1.04)	0.78 (1.27)	-0.02 (0.21)	0.67 (0.26)	0.74 (0.26)	-0.68	0.04195	-0.76	0.02374	-0.08	0.83179	0.41	0.0328	Increase linear	-0.39 (1.08)	-0.15 (0.9)	0.19 (0.87)	-0.37 (0.31)	-0.06 (0.18)	0.15 (0.14)	-0.31	0.38518	-0.52
1436	INPP5D	INPP5D	Q92835	298	EMIF-AD MBD	MRM	NA		0	0	0	Decrease		0 (1)	0.14 (1.74)	-0.13 (1.14)	-0.09 (0.15)	0.13 (0.15)	-0.08 (0.11)	-0.22	0.30889	-0.01	0.96177	0.21	0.26474	0.41 (1.71)	0.27 (1.73)	-0.59 (1.68)	0.31 (0.24)	0.28 (0.28)	-0.61 (0.33)	0.03	0.93638	0.91	0.02558	0.88	0.04147	-0.48	0.067	Decrease non-linear	-0.12 (0.96)	-0.13 (0.98)	-0.15 (1.36)	-0.06 (0.3)	-0.08 (0.17)	-0.16 (0.18)	0.02	0.95919	0.1
1437	ISLR	ISLR	O14498	310	EMIF-AD MBD	MRM	NA		0	1	1			0 (1)	-0.17 (0.85)	0.33 (0.69)	0.04 (0.1)	-0.17 (0.09)	0.3 (0.07)	0.21	0.12494	-0.26	0.0328	-0.47	7e-05	-0.11 (0.96)	-0.22 (0.79)	-0.23 (0.72)	-0.07 (0.13)	-0.23 (0.15)	-0.22 (0.18)	0.16	0.43368	0.15	0.49101	0	0.98718	-0.08	0.5013		0.42 (0.59)	0.34 (0.66)	0.27 (0.76)	0.4 (0.17)	0.32 (0.09)	0.28 (0.1)	0.07	0.69408	0.12
1438	ISLR2	ISLR2	Q6UXK2	298	EMIF-AD MBD	MRM	NA		-1	1	1			0 (1)	-0.41 (1.13)	0.38 (1.05)	-0.02 (0.12)	-0.42 (0.12)	0.39 (0.09)	0.4	0.02306	-0.41	0.01025	-0.8	0	-0.16 (1.04)	-0.59 (1.3)	-0.72 (1)	-0.23 (0.18)	-0.58 (0.22)	-0.72 (0.27)	0.34	0.23456	0.49	0.14109	0.14	0.68483	-0.27	0.1258		0.65 (1.27)	0.44 (0.89)	0.24 (1.13)	0.67 (0.26)	0.47 (0.13)	0.23 (0.13)	0.2	0.4964	0.44
1440	ITGA7	ITGA7	Q13683	152	EMIF-AD MBD	MRM	NA		0	0	1			0 (1)	-0.18 (0.65)	0.21 (0.93)	-0.01 (0.15)	-0.19 (0.15)	0.22 (0.11)	0.18	0.39105	-0.23	0.24187	-0.4	0.0317	-0.32 (0.61)	-0.06 (0.79)	-0.17 (0.51)	-0.37 (0.25)	-0.08 (0.24)	-0.15 (0.26)	-0.29	0.40173	-0.22	0.55006	0.07	0.85222	0.07	0.6453		0.17 (0.89)	0.25 (0.91)	0.18 (1.01)	0.19 (0.26)	0.26 (0.14)	0.18 (0.17)	-0.07	0.81247	0.01
1443	ITGBL1	ITGBL1	O95965	204	EMIF-AD MBD	MRM	NA		0	0	0			0 (1)	-0.04 (0.85)	-0.03 (1.03)	0.06 (0.15)	-0.05 (0.13)	-0.06 (0.1)	0.11	0.58934	0.12	0.51877	0.01	0.93921	-0.17 (0.92)	0.05 (0.91)	0.13 (0.47)	-0.15 (0.2)	0.05 (0.22)	0.13 (0.31)	-0.2	0.5036	-0.28	0.45199	-0.07	0.84526	0.15	0.3576		-0.3 (0.98)	-0.07 (0.98)	0.09 (1.11)	-0.3 (0.27)	-0.1 (0.15)	0.11 (0.15)	-0.19	0.53166	-0.4
1444	ITIH1	ITIH1	P19827	249	ADNI	MRM	1	2	0	0	0			0 (0.99)	-0.11 (0.93)	-0.13 (0.8)	-0.02 (0.12)	-0.17 (0.09)	-0.14 (0.08)	0.14	0.35413	0.12	0.41295	-0.02	0.84879	-0.28 (0.79)	-0.18 (0.96)	0.17 (0.99)	-0.25 (0.18)	-0.26 (0.13)	0.1 (0.18)	0.01	0.96976	-0.34	0.19056	-0.35	0.11176	0.21	0.155		0.02 (0.8)	-0.19 (0.75)	-0.07 (0.88)	-0.15 (0.24)	-0.2 (0.1)	-0.05 (0.13)	0.06	0.83012	-0.09
1445	ITIH1	ITIH1	P19827	310	EMIF-AD MBD	MRM	NA	1	0	0	2			0 (1)	0.12 (0.82)	-0.16 (0.75)	-0.02 (0.1)	0.12 (0.1)	-0.14 (0.07)	-0.14	0.31164	0.12	0.32832	0.26	0.02876	-0.03 (0.88)	0.2 (0.81)	0.3 (0.7)	-0.05 (0.13)	0.2 (0.16)	0.29 (0.19)	-0.25	0.22787	-0.34	0.14508	-0.09	0.72886	0.15	0.2072		-0.27 (0.91)	-0.18 (0.57)	-0.09 (0.87)	-0.26 (0.17)	-0.16 (0.1)	-0.09 (0.1)	-0.1	0.60736	-0.17
1446	ITIH2	ITIH2	P19823	310	EMIF-AD MBD	MRM	NA		0	0	0			0 (1)	0.13 (0.87)	-0.04 (0.79)	-0.02 (0.1)	0.13 (0.1)	-0.03 (0.07)	-0.15	0.29351	0.02	0.88875	0.17	0.17629	-0.03 (0.9)	0.27 (0.87)	0.29 (0.8)	-0.05 (0.14)	0.27 (0.17)	0.29 (0.2)	-0.32	0.13839	-0.34	0.16102	-0.02	0.95125	0.17	0.198		-0.18 (0.98)	-0.08 (0.64)	0.04 (0.86)	-0.18 (0.18)	-0.06 (0.1)	0.04 (0.1)	-0.11	0.57784	-0.22
1447	ITIH3	ITIH3	Q06033	310	EMIF-AD MBD	MRM	NA		0	0	2	Increase		0 (1)	0.37 (1.1)	0.12 (0.77)	0.1 (0.11)	0.37 (0.1)	0.07 (0.08)	-0.28	0.06428	0.03	0.83718	0.31	0.0195	0.13 (1.1)	0.43 (1.03)	0.78 (1.11)	0.21 (0.15)	0.43 (0.18)	0.8 (0.21)	-0.21	0.36257	-0.59	0.02439	-0.38	0.17949	0.29	0.0696	Increase non-linear	0 (0.77)	0.15 (0.76)	0.14 (0.8)	-0.04 (0.19)	0.1 (0.11)	0.16 (0.11)	-0.13	0.55303	-0.2
1448	ITIH4	ITIH4	Q14624	310	EMIF-AD MBD	MRM	NA		0	0	2			0 (1)	0.16 (0.94)	-0.19 (0.87)	-0.02 (0.11)	0.16 (0.11)	-0.18 (0.08)	-0.18	0.23219	0.17	0.23163	0.35	0.00872	-0.05 (0.9)	0.32 (0.99)	0.38 (0.91)	-0.06 (0.15)	0.32 (0.18)	0.37 (0.22)	-0.39	0.10896	-0.44	0.10241	-0.05	0.8601	0.22	0.1059		-0.35 (1.04)	-0.19 (0.76)	-0.14 (0.94)	-0.35 (0.2)	-0.18 (0.11)	-0.14 (0.11)	-0.17	0.45406	-0.2
1449	ITIH5	ITIH5	Q86UX2	249	ADNI	MRM	0	2	-1	0	1			0 (1)	-0.43 (1.19)	0.19 (1.09)	-0.02 (0.16)	-0.46 (0.12)	0.19 (0.1)	0.44	0.02638	-0.21	0.27135	-0.65	5e-05	-0.17 (1.12)	-0.6 (1.16)	-0.34 (1.29)	-0.16 (0.25)	-0.64 (0.17)	-0.37 (0.25)	0.48	0.12183	0.21	0.55713	-0.27	0.36793	-0.05	0.7925		0.47 (0.99)	0.24 (1.01)	0.03 (1.23)	0.36 (0.33)	0.25 (0.14)	0.04 (0.18)	0.1	0.7723	0.31
1450	ITIH5	ITIH5	Q86UX2	310	EMIF-AD MBD	MRM	NA	1	0	0	1			0 (1)	-0.15 (1.04)	0.09 (0.91)	-0.09 (0.11)	-0.16 (0.11)	0.14 (0.08)	0.07	0.66935	-0.24	0.09615	-0.31	0.02494	0.03 (1.18)	-0.34 (0.82)	-0.27 (0.99)	-0.07 (0.16)	-0.33 (0.19)	-0.29 (0.23)	0.26	0.30301	0.22	0.4256	-0.04	0.90176	-0.16	0.3056		0.13 (0.88)	0.1 (0.83)	0.06 (1)	0.18 (0.21)	0.16 (0.12)	0.04 (0.12)	0.02	0.93131	0.14
1452	ITM2B	ITM2B	Q9Y287	310	EMIF-AD MBD	MRM	NA		0	0	0			0 (1)	-0.03 (1.03)	0.19 (0.9)	0.01 (0.11)	-0.05 (0.11)	0.19 (0.08)	0.05	0.72693	-0.19	0.18111	-0.24	0.0702	0.1 (0.99)	-0.15 (0.99)	-0.15 (1.21)	0.03 (0.16)	-0.14 (0.19)	-0.15 (0.22)	0.18	0.47036	0.18	0.50608	0	0.9895	-0.09	0.5467		0.11 (0.89)	0.22 (0.85)	0.18 (0.97)	0.16 (0.2)	0.24 (0.11)	0.18 (0.12)	-0.08	0.72368	-0.02
1456	JAG1	JAG1	P78504	155	EMIF-AD MBD	MRM	NA		0	0	0			0 (1)	-0.3 (0.87)	0.08 (0.9)	0.04 (0.16)	-0.3 (0.15)	0.06 (0.1)	0.34	0.12914	-0.02	0.9253	-0.36	0.05037	-0.31 (0.77)	0.01 (0.87)	-0.96 (0.91)	-0.28 (0.21)	0.01 (0.24)	-0.99 (0.36)	-0.29	0.37453	0.71	0.09274	1	0.02397	-0.23	0.2733		0.44 (0.82)	0.18 (0.74)	-0.12 (1.03)	0.44 (0.28)	0.16 (0.15)	-0.11 (0.15)	0.27	0.39052	0.55
1458	JAM2	JAM2	P57087	285	EMIF-AD MBD	MRM	NA		-1	0	1			0 (1)	-0.45 (0.86)	0.14 (0.83)	-0.06 (0.11)	-0.45 (0.1)	0.17 (0.08)	0.39	0.01051	-0.23	0.09245	-0.62	0	-0.39 (0.99)	-0.53 (0.78)	-0.43 (0.71)	-0.46 (0.15)	-0.52 (0.17)	-0.44 (0.21)	0.06	0.80699	-0.02	0.94379	-0.08	0.78398	-0.01	0.9676		0.29 (0.87)	0.14 (0.82)	0.08 (0.84)	0.33 (0.19)	0.17 (0.11)	0.07 (0.11)	0.16	0.46405	0.26
1459	JAM3	JAM3	Q9BX67	310	EMIF-AD MBD	MRM	NA		0	0	1			0 (1)	-0.29 (0.9)	0.12 (0.83)	-0.07 (0.1)	-0.3 (0.1)	0.16 (0.07)	0.23	0.11421	-0.23	0.08364	-0.46	0.00031	-0.34 (0.91)	-0.23 (1.06)	-0.25 (0.63)	-0.45 (0.14)	-0.22 (0.17)	-0.27 (0.21)	-0.22	0.32114	-0.18	0.48235	0.05	0.85756	0.09	0.4789		0.12 (0.99)	0.16 (0.83)	0.08 (0.8)	0.17 (0.19)	0.22 (0.1)	0.06 (0.11)	-0.05	0.82992	0.11
1461	JCHAIN	JCHAIN	P01591	310	EMIF-AD MBD	MRM	NA		0	0	0			0 (1)	0.04 (1.08)	-0.14 (0.96)	0.03 (0.12)	0.04 (0.11)	-0.16 (0.08)	-0.01	0.95585	0.19	0.2022	0.2	0.15849	-0.08 (1.04)	0.27 (1.17)	-0.05 (1.06)	-0.05 (0.17)	0.27 (0.21)	-0.05 (0.24)	-0.33	0.22473	0	0.99529	0.32	0.30981	0.04	0.8185		0.12 (1.12)	-0.18 (0.88)	-0.17 (0.98)	0.11 (0.22)	-0.19 (0.12)	-0.17 (0.13)	0.3	0.22923	0.27
1465	KCTD12	KCTD12	Q96CX2	229	EMIF-AD MBD	MRM	NA		0	0	1			0 (1)	-0.25 (0.91)	0.17 (1.18)	-0.08 (0.15)	-0.25 (0.14)	0.21 (0.1)	0.17	0.40338	-0.29	0.12643	-0.46	0.00854	-0.31 (0.84)	-0.18 (0.83)	-0.21 (1.13)	-0.33 (0.23)	-0.17 (0.27)	-0.22 (0.28)	-0.16	0.64754	-0.11	0.74769	0.05	0.90093	0.02	0.9169		0.17 (1.35)	0.1 (1.1)	0.24 (1.22)	0.16 (0.28)	0.11 (0.16)	0.24 (0.16)	0.05	0.87643	-0.08
1467	KDM2A	KDM2A	Q9Y2K7	267	EMIF-AD MBD	MRM	NA		-1	0	1		Decrease	0 (1)	-0.54 (0.78)	0.13 (0.81)	-0.05 (0.11)	-0.55 (0.11)	0.16 (0.08)	0.5	0.00113	-0.2	0.1434	-0.7	0	-0.45 (0.71)	-0.52 (0.82)	-0.75 (0.88)	-0.53 (0.15)	-0.52 (0.18)	-0.76 (0.2)	-0.01	0.96763	0.23	0.36522	0.24	0.3764	-0.13	0.3092		0.19 (0.88)	0.24 (0.72)	-0.02 (0.86)	0.24 (0.19)	0.28 (0.1)	-0.04 (0.11)	-0.03	0.86973	0.28
1469	KIAA0319	KIAA0319	Q5VV43	292	EMIF-AD MBD	MRM	NA		0	0	0		Decrease	0 (1)	-0.13 (0.97)	0.12 (1.11)	0.08 (0.12)	-0.13 (0.12)	0.07 (0.09)	0.2	0.23865	0	0.97719	-0.2	0.18916	-0.2 (0.7)	0.14 (1.15)	-0.36 (1.16)	-0.15 (0.19)	0.14 (0.22)	-0.34 (0.26)	-0.29	0.31251	0.2	0.53382	0.49	0.14967	-0.06	0.6726		0.55 (1.11)	0.13 (1.15)	-0.05 (1.04)	0.53 (0.24)	0.1 (0.14)	-0.04 (0.14)	0.43	0.1138	0.56
1470	KIAA0319L	KIAA0319L	Q8IZA0	307	EMIF-AD MBD	MRM	NA		-1	0	1			0 (1)	-0.47 (1.09)	0.02 (1.04)	0.04 (0.12)	-0.47 (0.12)	0 (0.09)	0.52	0.00271	0.04	0.78464	-0.47	0.00161	-0.52 (1.11)	-0.4 (1.09)	-0.47 (1.12)	-0.52 (0.18)	-0.4 (0.22)	-0.47 (0.26)	-0.12	0.67691	-0.05	0.86589	0.07	0.84706	0	0.9801		-0.02 (0.87)	0.18 (1.09)	-0.14 (1.03)	-0.01 (0.23)	0.17 (0.13)	-0.14 (0.14)	-0.19	0.48223	0.12
1472	KIAA1549L	KIAA1549L	Q6ZVL6	300	EMIF-AD MBD	MRM	NA		-1	1	1	Decrease	Decrease	0 (1)	-0.65 (0.93)	0.29 (0.92)	-0.02 (0.11)	-0.65 (0.11)	0.3 (0.08)	0.64	5e-05	-0.32	0.02613	-0.95	0	-0.28 (0.83)	-0.87 (0.99)	-1.07 (0.75)	-0.3 (0.16)	-0.86 (0.18)	-1.07 (0.22)	0.56	0.02037	0.77	0.00437	0.2	0.4708	-0.39	0.0032	Decrease linear	0.61 (1.01)	0.3 (0.84)	0.15 (0.96)	0.64 (0.19)	0.31 (0.11)	0.15 (0.12)	0.33	0.13892	0.49
1474	KIT	KIT	P10721	310	EMIF-AD MBD	MRM	NA		-1	0	1	Decrease		0 (1)	-0.5 (1.12)	0.04 (0.77)	-0.04 (0.11)	-0.51 (0.11)	0.07 (0.08)	0.46	0.00232	-0.11	0.41622	-0.58	2e-05	-0.23 (1.01)	-0.54 (1.09)	-1.01 (1.26)	-0.31 (0.15)	-0.54 (0.18)	-1.03 (0.22)	0.23	0.32599	0.72	0.00653	0.49	0.08449	-0.37	0.0225	Decrease linear	0 (0.81)	0.12 (0.77)	-0.03 (0.76)	0.04 (0.19)	0.16 (0.11)	-0.04 (0.11)	-0.13	0.57145	0.08
1475	KITLG	KITLG	P21583	270	ADNI	RBM	0	2	0	1	1			0 (1)	-0.18 (0.85)	0.35 (0.87)	-0.01 (0.12)	-0.23 (0.09)	0.34 (0.08)	0.22	0.14328	-0.35	0.01432	-0.57	0	-0.26 (0.55)	-0.1 (0.97)	-0.27 (0.82)	-0.23 (0.18)	-0.19 (0.12)	-0.35 (0.18)	-0.04	0.84438	0.11	0.65026	0.16	0.4568	-0.03	0.8179		0.35 (0.58)	0.34 (0.92)	0.37 (0.87)	0.19 (0.24)	0.32 (0.1)	0.4 (0.13)	-0.14	0.60533	-0.21
1476	KITLG	KITLG	P21583	165	EMIF-AD MBD	MRM	NA	1	0	0	0			0 (1)	0.22 (0.85)	0.26 (0.88)	0.04 (0.16)	0.23 (0.14)	0.24 (0.1)	-0.19	0.35256	-0.2	0.31988	-0.01	0.97192	0.01 (0.56)	0.42 (0.77)	0.48 (1.4)	0.04 (0.19)	0.43 (0.25)	0.5 (0.29)	-0.4	0.20636	-0.46	0.18226	-0.06	0.86739	0.25	0.1121		0.55 (1.02)	0.19 (0.88)	0.23 (0.79)	0.52 (0.24)	0.17 (0.14)	0.24 (0.17)	0.35	0.19528	0.28
1478	KLK10	KLK10	O43240	249	ADNI	MRM	0		0	1	1			0 (1)	-0.05 (0.89)	0.37 (1.04)	-0.03 (0.13)	-0.12 (0.1)	0.36 (0.09)	0.08	0.61487	-0.39	0.01449	-0.47	0.00045	-0.14 (0.94)	-0.11 (0.9)	0.14 (0.86)	-0.1 (0.21)	-0.2 (0.15)	0.05 (0.21)	0.1	0.69223	-0.15	0.62341	-0.25	0.32255	0.11	0.4172		0.45 (0.7)	0.3 (1.16)	0.46 (0.93)	0.25 (0.27)	0.29 (0.12)	0.48 (0.15)	-0.05	0.87517	-0.24
1480	KLK11	KLK11	Q9UBX7	249	ADNI	MRM	0	2	0	1	0			0 (1)	0.28 (1.19)	0.42 (1.03)	0.01 (0.15)	0.31 (0.12)	0.43 (0.1)	-0.3	0.12157	-0.42	0.0222	-0.12	0.43334	0.15 (1.17)	0.21 (1.16)	0.55 (1.29)	0.1 (0.24)	0.29 (0.17)	0.64 (0.24)	-0.19	0.53286	-0.54	0.11975	-0.35	0.22742	0.25	0.1882		0 (1.29)	0.46 (1.01)	0.48 (0.97)	0.12 (0.32)	0.49 (0.14)	0.46 (0.17)	-0.37	0.28867	-0.34
1481	KLK11	KLK11	Q9UBX7	290	EMIF-AD MBD	MRM	NA	1	1	0	2			0 (1)	0.3 (1.13)	-0.23 (0.9)	-0.09 (0.11)	0.27 (0.11)	-0.17 (0.08)	-0.36	0.0258	0.08	0.57587	0.44	0.00195	0.47 (1.19)	0.1 (1.16)	0.22 (0.99)	0.28 (0.17)	0.11 (0.2)	0.2 (0.23)	0.18	0.50262	0.08	0.77175	-0.09	0.75589	-0.03	0.8564		-0.23 (0.81)	-0.28 (0.94)	-0.18 (0.88)	-0.18 (0.21)	-0.18 (0.12)	-0.2 (0.12)	0	0.98915	0.02
1482	KLK6	KLK6	Q92876	249	ADNI	MRM	1	2	-1	1	1			0 (0.92)	-0.32 (0.91)	0.62 (0.93)	-0.02 (0.13)	-0.36 (0.1)	0.61 (0.08)	0.34	0.03716	-0.64	4e-05	-0.97	0	-0.16 (0.97)	-0.42 (0.98)	-0.29 (0.7)	-0.14 (0.2)	-0.48 (0.14)	-0.34 (0.2)	0.34	0.16655	0.2	0.48124	-0.14	0.55407	-0.04	0.7509		1.03 (0.55)	0.71 (0.8)	0.36 (1.14)	0.88 (0.26)	0.71 (0.11)	0.38 (0.14)	0.16	0.56199	0.5
1483	KLK6	KLK6	Q92876	310	EMIF-AD MBD	MRM	NA	1	0	1	1		Decrease	0 (1)	-0.24 (0.89)	0.31 (0.7)	-0.03 (0.1)	-0.25 (0.09)	0.33 (0.07)	0.22	0.10612	-0.37	0.00341	-0.58	0	-0.08 (0.96)	-0.36 (0.71)	-0.42 (0.98)	-0.15 (0.13)	-0.35 (0.15)	-0.42 (0.18)	0.2	0.31722	0.27	0.22509	0.07	0.7708	-0.15	0.2538		0.46 (0.77)	0.37 (0.68)	0.18 (0.7)	0.49 (0.17)	0.4 (0.09)	0.18 (0.1)	0.09	0.63209	0.32
1484	KLK7	KLK7	P49862	194	EMIF-AD MBD	MRM	NA		0	0	0	Decrease		0 (1)	-0.32 (1.4)	-0.08 (1.14)	-0.07 (0.18)	-0.34 (0.17)	-0.03 (0.12)	0.26	0.28124	-0.04	0.84666	-0.31	0.14352	0.24 (1.77)	-0.55 (1.11)	-0.81 (0.85)	0.18 (0.29)	-0.55 (0.28)	-0.83 (0.34)	0.73	0.07574	1.01	0.02339	0.28	0.51862	-0.52	0.0451	Decrease linear	-0.19 (0.8)	0.15 (1.04)	-0.32 (1.32)	-0.12 (0.34)	0.17 (0.18)	-0.33 (0.2)	-0.29	0.45158	0.21
1485	KLKB1	KLKB1	P03952	310	EMIF-AD MBD	MRM	NA		0	0	2			0 (1)	0.08 (0.9)	-0.27 (0.89)	-0.08 (0.11)	0.08 (0.1)	-0.23 (0.08)	-0.16	0.28482	0.15	0.28388	0.31	0.01873	-0.06 (1)	0.11 (0.91)	0.35 (0.6)	-0.13 (0.15)	0.11 (0.18)	0.34 (0.22)	-0.24	0.30745	-0.46	0.07874	-0.22	0.43208	0.2	0.1449		-0.45 (1.21)	-0.33 (0.73)	-0.15 (0.93)	-0.42 (0.19)	-0.29 (0.11)	-0.16 (0.11)	-0.14	0.54243	-0.26
1487	KNG1	KNG1	P01042	249	ADNI	MRM	1	2	0	0	0			0 (0.99)	-0.17 (1.04)	-0.18 (0.82)	-0.02 (0.13)	-0.23 (0.1)	-0.2 (0.08)	0.2	0.20511	0.17	0.26206	-0.03	0.79579	-0.34 (0.75)	-0.16 (1.11)	-0.03 (1.13)	-0.3 (0.2)	-0.24 (0.14)	-0.12 (0.2)	-0.06	0.8019	-0.19	0.50407	-0.13	0.59293	0.11	0.4943		0.1 (0.53)	-0.23 (0.79)	-0.17 (0.93)	-0.07 (0.26)	-0.25 (0.11)	-0.15 (0.14)	0.18	0.53073	0.07
1488	KNG1	KNG1	P01042	310	EMIF-AD MBD	MRM	NA	1	0	-1	2	Increase		0 (1)	0.04 (0.89)	-0.41 (0.9)	-0.01 (0.11)	0.04 (0.1)	-0.41 (0.08)	-0.05	0.71379	0.4	0.00426	0.45	0.00061	-0.28 (0.88)	0.26 (0.79)	0.38 (0.86)	-0.31 (0.15)	0.27 (0.18)	0.37 (0.21)	-0.57	0.0154	-0.68	0.00977	-0.11	0.70579	0.35	0.0068	Increase linear	-0.67 (1.22)	-0.4 (0.74)	-0.34 (0.93)	-0.67 (0.19)	-0.38 (0.11)	-0.34 (0.11)	-0.29	0.19369	-0.32
1490	KRT1	KRT1	P04264	310	EMIF-AD MBD	MRM	NA		1	0	2			0 (1)	0.34 (1.01)	0.02 (1.03)	-0.03 (0.12)	0.34 (0.12)	0.04 (0.09)	-0.36	0.03008	-0.06	0.68269	0.3	0.03943	0.47 (1.05)	0.1 (0.85)	0.4 (1.1)	0.47 (0.18)	0.1 (0.21)	0.4 (0.25)	0.37	0.18453	0.06	0.83627	-0.3	0.35542	-0.04	0.777		-0.01 (1)	-0.05 (0.99)	0.11 (1.1)	0 (0.23)	-0.05 (0.13)	0.11 (0.13)	0.05	0.85171	-0.12
1491	KRT10	KRT10	P13645	310	EMIF-AD MBD	MRM	NA		0	0	0			0 (1)	0.22 (1.09)	-0.04 (1.14)	-0.03 (0.13)	0.22 (0.12)	-0.02 (0.09)	-0.25	0.1578	-0.01	0.93249	0.24	0.12574	0.48 (1.14)	-0.1 (0.92)	0.13 (1.11)	0.47 (0.19)	-0.1 (0.23)	0.13 (0.27)	0.57	0.05764	0.34	0.30717	-0.23	0.51645	-0.2	0.2072		-0.14 (1.06)	-0.15 (1.1)	0.11 (1.22)	-0.13 (0.25)	-0.14 (0.14)	0.11 (0.14)	0.01	0.97064	-0.24
1492	KRT12	KRT12	Q99456	269	EMIF-AD MBD	MRM	NA		1	0	2			0 (1)	0.33 (1.05)	-0.01 (1.04)	-0.04 (0.13)	0.33 (0.13)	0.01 (0.09)	-0.37	0.04118	-0.05	0.75144	0.32	0.04421	0.47 (1.1)	0.09 (0.93)	0.37 (1.12)	0.47 (0.2)	0.09 (0.23)	0.37 (0.27)	0.38	0.2152	0.11	0.75041	-0.28	0.44175	-0.09	0.5852		-0.03 (1.05)	-0.14 (1.05)	0.14 (1.01)	-0.03 (0.24)	-0.14 (0.14)	0.14 (0.14)	0.11	0.69387	-0.17
1494	KRT14	KRT14	P02533	183	EMIF-AD MBD	MRM	NA		0	0	0			0 (1)	0.22 (1.04)	-0.1 (1.18)	0.03 (0.16)	0.22 (0.16)	-0.11 (0.12)	-0.19	0.41287	0.13	0.52697	0.32	0.11325	0.36 (1.23)	0.11 (0.91)	0.07 (0.71)	0.38 (0.25)	0.09 (0.31)	0.08 (0.38)	0.29	0.47309	0.3	0.51283	0.01	0.98149	-0.17	0.4313		-0.22 (1.12)	-0.07 (1.09)	-0.09 (1.29)	-0.23 (0.35)	-0.1 (0.19)	-0.07 (0.19)	-0.12	0.75529	-0.16
1496	KRT16	KRT16	P08779	310	EMIF-AD MBD	MRM	NA		0	0	0			0 (1)	0.23 (0.98)	0 (1.05)	-0.02 (0.12)	0.23 (0.12)	0.01 (0.09)	-0.25	0.13686	-0.03	0.83496	0.22	0.13691	0.41 (1.01)	0.02 (0.84)	0.15 (1.09)	0.41 (0.18)	0.02 (0.21)	0.15 (0.25)	0.39	0.15593	0.26	0.38894	-0.13	0.69549	-0.14	0.3326		0.12 (1.02)	-0.14 (1.03)	0.11 (1.08)	0.12 (0.23)	-0.15 (0.13)	0.11 (0.13)	0.27	0.29023	0.01
1497	KRT17	KRT17	Q04695	101	EMIF-AD MBD	MRM	NA		0	0	2			0 (1)	0.56 (1.03)	-0.09 (1.12)	0.04 (0.21)	0.54 (0.23)	-0.1 (0.15)	-0.5	0.12732	0.14	0.61023	0.64	0.02407	0.57 (1.24)	0.5 (1.11)	0.63 (0.28)	0.55 (0.33)	0.43 (0.46)	0.49 (0.52)	0.12	0.83283	0.06	0.92603	-0.06	0.92767	0.02	0.9446		-0.42 (1.15)	-0.01 (1.14)	-0.04 (1.13)	-0.41 (0.37)	-0.01 (0.24)	0.03 (0.27)	-0.4	0.36498	-0.45
1498	KRT18	KRT18	P05783	300	EMIF-AD MBD	MRM	NA		0	0	0			0 (1)	0.17 (1.07)	0.01 (1.07)	-0.05 (0.12)	0.17 (0.12)	0.04 (0.09)	-0.22	0.20051	-0.1	0.54206	0.13	0.40913	0.43 (1)	-0.18 (1.11)	0.13 (1.07)	0.41 (0.18)	-0.18 (0.22)	0.12 (0.27)	0.58	0.04242	0.29	0.37112	-0.29	0.39575	-0.19	0.2454		0.11 (0.94)	-0.17 (1.12)	0.18 (1.04)	0.12 (0.23)	-0.15 (0.13)	0.17 (0.14)	0.27	0.31326	-0.06
1500	KRT2	KRT2	P35908	310	EMIF-AD MBD	MRM	NA		0	0	0			0 (1)	0.2 (1.11)	-0.09 (1.18)	-0.08 (0.13)	0.2 (0.13)	-0.05 (0.09)	-0.28	0.13002	-0.03	0.86783	0.25	0.11835	0.39 (1.19)	0.02 (0.92)	0.05 (1.19)	0.34 (0.2)	0.03 (0.24)	0.04 (0.28)	0.32	0.30534	0.3	0.38075	-0.02	0.96436	-0.16	0.3368		-0.14 (0.92)	-0.26 (1.09)	0.1 (1.33)	-0.11 (0.25)	-0.23 (0.14)	0.09 (0.15)	0.11	0.69846	-0.21
1502	KRT222	KRT222	Q8N1A0	260	EMIF-AD MBD	MRM	NA		0	0	0			0 (1)	0.15 (1.04)	-0.06 (1.04)	0 (0.13)	0.15 (0.13)	-0.06 (0.09)	-0.14	0.43734	0.06	0.70295	0.21	0.19917	0.27 (1.11)	0.05 (1)	-0.01 (0.95)	0.29 (0.19)	0.05 (0.25)	-0.02 (0.29)	0.24	0.4588	0.31	0.38327	0.07	0.86404	-0.15	0.3952		0.09 (1)	-0.14 (1.01)	-0.03 (1.08)	0.09 (0.25)	-0.15 (0.15)	-0.02 (0.14)	0.24	0.40979	0.11
1504	KRT24	KRT24	Q2M2I5	258	EMIF-AD MBD	MRM	NA		0	0	0	Decrease		0 (1)	0.34 (1.14)	0.07 (1.2)	-0.01 (0.14)	0.34 (0.15)	0.08 (0.1)	-0.36	0.08818	-0.09	0.61418	0.26	0.15164	0.71 (1.12)	-0.03 (0.88)	-0.05 (1.3)	0.72 (0.22)	-0.04 (0.29)	-0.05 (0.34)	0.76	0.04479	0.77	0.05813	0.02	0.97229	-0.39	0.0445	Decrease linear	0.24 (1.16)	-0.13 (1.18)	0.23 (1.22)	0.23 (0.29)	-0.13 (0.16)	0.23 (0.16)	0.37	0.27014	0
1505	KRT25	KRT25	Q7Z3Z0	163	EMIF-AD MBD	MRM	NA		0	0	0		Increase	0 (1)	0.34 (1.05)	-0.03 (1.25)	0 (0.19)	0.34 (0.2)	-0.03 (0.13)	-0.34	0.22367	0.03	0.91354	0.37	0.12146	0.39 (1.24)	0.29 (0.75)	0.3 (1.05)	0.39 (0.3)	0.28 (0.39)	0.31 (0.5)	0.11	0.83268	0.07	0.9008	-0.03	0.95858	-0.06	0.8267		-0.47 (1.15)	-0.19 (1.29)	0.27 (1.21)	-0.47 (0.35)	-0.2 (0.2)	0.28 (0.2)	-0.27	0.5067	-0.75
1506	KRT26	KRT26	Q7Z3Y9	226	EMIF-AD MBD	MRM	NA		0	0	0			0 (1)	0.28 (0.96)	0.07 (1.12)	-0.02 (0.15)	0.28 (0.14)	0.08 (0.1)	-0.29	0.15283	-0.09	0.6185	0.2	0.25125	0.33 (1.04)	0.23 (0.83)	0.22 (0.99)	0.34 (0.21)	0.23 (0.26)	0.21 (0.31)	0.11	0.7474	0.13	0.73587	0.02	0.96318	-0.03	0.8655		0.09 (0.99)	-0.05 (1.07)	0.16 (1.21)	0.1 (0.25)	-0.05 (0.16)	0.16 (0.15)	0.15	0.61821	-0.06
1507	KRT27	KRT27	Q7Z3Y8	251	EMIF-AD MBD	MRM	NA		0	0	0			0 (1)	0.14 (1.25)	-0.14 (1.38)	-0.05 (0.16)	0.13 (0.17)	-0.12 (0.12)	-0.18	0.44253	0.07	0.73089	0.25	0.22874	0.43 (1.35)	-0.25 (1.15)	-0.03 (1.05)	0.42 (0.26)	-0.24 (0.34)	-0.04 (0.39)	0.66	0.12811	0.46	0.32688	-0.2	0.69321	-0.25	0.2601		-0.27 (1.35)	-0.31 (1.34)	0.06 (1.42)	-0.26 (0.34)	-0.3 (0.19)	0.06 (0.18)	0.04	0.91847	-0.32
1508	KRT28	KRT28	Q7Z3Y7	251	EMIF-AD MBD	MRM	NA		0	0	0			0 (1)	0.15 (1.13)	-0.15 (1.36)	-0.04 (0.15)	0.15 (0.16)	-0.13 (0.11)	-0.19	0.40227	0.09	0.65693	0.28	0.1674	0.42 (1.22)	-0.2 (1.04)	0 (0.95)	0.42 (0.25)	-0.19 (0.33)	-0.01 (0.38)	0.61	0.15103	0.42	0.35287	-0.18	0.71251	-0.23	0.2601		-0.27 (1.32)	-0.3 (1.34)	0.04 (1.39)	-0.26 (0.33)	-0.3 (0.18)	0.04 (0.18)	0.04	0.92461	-0.3
1522	KRT5	KRT5	P13647	310	EMIF-AD MBD	MRM	NA		0	0	0			0 (1)	0.14 (1.07)	-0.04 (1.11)	0 (0.13)	0.14 (0.12)	-0.04 (0.09)	-0.15	0.40456	0.04	0.82008	0.18	0.23174	0.33 (1.16)	-0.08 (0.97)	0.05 (0.98)	0.35 (0.19)	-0.08 (0.22)	0.06 (0.27)	0.43	0.14446	0.29	0.37087	-0.14	0.69317	-0.16	0.3085		0.11 (1.01)	-0.18 (1.07)	0.06 (1.18)	0.1 (0.24)	-0.2 (0.14)	0.06 (0.14)	0.3	0.28048	0.04
1523	KRT6A	KRT6A	P02538	110	EMIF-AD MBD	MRM	NA		0	0	0			0 (1)	0.01 (0.99)	-0.34 (1.11)	0.06 (0.21)	-0.02 (0.21)	-0.36 (0.15)	0.08	0.79116	0.43	0.11168	0.35	0.17617	0.08 (1.3)	0.02 (0.66)	-0.15 (0.57)	0.05 (0.31)	0.01 (0.41)	-0.17 (0.44)	0.05	0.92976	0.22	0.68861	0.17	0.77655	-0.16	0.5435		-0.65 (1.16)	-0.4 (1.03)	-0.15 (1.22)	-0.61 (0.38)	-0.45 (0.21)	-0.06 (0.25)	-0.16	0.72338	-0.55
1524	KRT6B	KRT6B	P04259	278	EMIF-AD MBD	MRM	NA		0	0	0			0 (1)	-0.03 (1.12)	-0.02 (1.07)	0.04 (0.13)	-0.03 (0.13)	-0.04 (0.1)	0.07	0.71656	0.07	0.66944	0	0.97558	0.09 (1.2)	-0.13 (1.01)	-0.2 (1.13)	0.14 (0.19)	-0.12 (0.24)	-0.19 (0.32)	0.26	0.40144	0.32	0.38396	0.07	0.8691	-0.19	0.3144		0.01 (1.14)	-0.04 (0.98)	0.01 (1.16)	0 (0.25)	-0.09 (0.14)	0.02 (0.15)	0.09	0.76527	-0.02
1525	KRT6C	KRT6C	P48668	100	EMIF-AD MBD	MRM	NA		0	0	0			0 (1)	0.19 (1.18)	-0.21 (0.98)	0.06 (0.21)	0.19 (0.22)	-0.24 (0.16)	-0.13	0.67674	0.31	0.25529	0.43	0.10438	0.33 (1.28)	-0.06 (1.28)	0.1 (0.76)	0.38 (0.3)	-0.18 (0.45)	0.15 (0.54)	0.56	0.30838	0.23	0.70958	-0.33	0.64114	-0.18	0.6171		-0.19 (0.93)	-0.23 (1.03)	-0.19 (1.01)	-0.18 (0.38)	-0.34 (0.25)	-0.1 (0.26)	0.15	0.74127	-0.08
1529	KRT73	KRT73	Q86Y46	125	EMIF-AD MBD	MRM	NA		0	0	0			0 (1)	0.52 (1.23)	0.04 (1.19)	0.02 (0.22)	0.52 (0.21)	0.03 (0.15)	-0.5	0.1004	-0.01	0.96491	0.49	0.06055	0.79 (1.33)	0.59 (0.49)	-0.01 (1.5)	0.75 (0.33)	0.63 (0.43)	0 (0.43)	0.12	0.83115	0.76	0.16964	0.64	0.2983	-0.37	0.1966		-0.07 (1.25)	-0.09 (1.22)	0.15 (1.18)	-0.08 (0.46)	-0.12 (0.26)	0.18 (0.21)	0.04	0.94199	-0.27
1545	KRT9	KRT9	P35527	310	EMIF-AD MBD	MRM	NA		1	0	2			0 (1)	0.37 (0.95)	0.01 (0.98)	-0.02 (0.11)	0.37 (0.11)	0.02 (0.08)	-0.39	0.01495	-0.04	0.7701	0.35	0.01296	0.49 (0.98)	0.15 (0.83)	0.45 (1.04)	0.49 (0.17)	0.15 (0.2)	0.45 (0.24)	0.33	0.20466	0.03	0.91157	-0.3	0.33521	-0.03	0.8465		0.03 (0.94)	-0.07 (0.9)	0.09 (1.09)	0.03 (0.21)	-0.07 (0.12)	0.09 (0.12)	0.1	0.6702	-0.06
1552	L1CAM	L1CAM	P32004	249	ADNI	MRM	1	2	-1	1	1			0 (0.89)	-0.67 (1.2)	0.62 (1.04)	-0.02 (0.15)	-0.69 (0.12)	0.62 (0.1)	0.67	0.00045	-0.64	0.00042	-1.32	0	-0.59 (1.28)	-0.6 (1.21)	-0.9 (1.11)	-0.58 (0.24)	-0.64 (0.17)	-0.93 (0.24)	0.06	0.84267	0.35	0.31442	0.29	0.3224	-0.14	0.4651		0.88 (0.71)	0.75 (0.97)	0.35 (1.17)	0.75 (0.32)	0.76 (0.14)	0.37 (0.17)	-0.01	0.97287	0.38
1553	L1CAM	L1CAM	P32004	310	EMIF-AD MBD	MRM	NA	1	-1	1	1	Decrease		0 (1)	-0.42 (0.97)	0.39 (0.74)	-0.09 (0.1)	-0.43 (0.1)	0.44 (0.07)	0.34	0.01332	-0.53	4e-05	-0.87	0	-0.11 (0.8)	-0.63 (0.98)	-0.76 (1.15)	-0.21 (0.14)	-0.62 (0.16)	-0.78 (0.19)	0.41	0.05356	0.57	0.01618	0.16	0.53042	-0.31	0.0249	Decrease linear	0.54 (0.98)	0.38 (0.66)	0.35 (0.73)	0.59 (0.17)	0.43 (0.1)	0.33 (0.1)	0.16	0.42975	0.26
1554	LAIR1	LAIR1	Q6GTX8	274	EMIF-AD MBD	MRM	NA		0	1	1			0 (1)	0.14 (0.92)	0.78 (0.91)	0.11 (0.12)	0.14 (0.11)	0.72 (0.08)	-0.04	0.81268	-0.61	5e-05	-0.58	4e-05	0.14 (0.87)	0.14 (1.11)	0.13 (0.74)	0.21 (0.16)	0.13 (0.19)	0.16 (0.24)	0.08	0.76149	0.05	0.85117	-0.02	0.93808	-0.08	0.5543		0.96 (1.03)	0.79 (0.89)	0.7 (0.89)	0.94 (0.21)	0.75 (0.12)	0.71 (0.12)	0.19	0.42417	0.23
1555	LAIR2	LAIR2	Q6ISS4	224	EMIF-AD MBD	MRM	NA		0	1	1			0 (1)	0.07 (0.92)	0.82 (0.88)	0.1 (0.13)	0.08 (0.12)	0.76 (0.09)	0.02	0.91367	-0.66	5e-05	-0.68	2e-05	0.06 (0.8)	0.01 (1.22)	0.17 (0.71)	0.16 (0.18)	0.01 (0.22)	0.17 (0.27)	0.15	0.59961	-0.01	0.97531	-0.16	0.65003	-0.04	0.7951		0.87 (0.94)	0.87 (0.87)	0.76 (0.89)	0.83 (0.22)	0.82 (0.13)	0.76 (0.13)	0.01	0.97687	0.07
1556	LAMA1	LAMA1	P25391	139	EMIF-AD MBD	MRM	NA		0	0	1			0 (1)	-0.45 (0.6)	0 (0.94)	-0.03 (0.17)	-0.46 (0.15)	0.02 (0.11)	0.43	0.05442	-0.05	0.80799	-0.48	0.00823	-0.42 (0.68)	-0.69 (0.51)	-0.26 (0.47)	-0.43 (0.21)	-0.72 (0.27)	-0.25 (0.28)	0.28	0.42087	-0.19	0.58927	-0.47	0.24092	0.06	0.6143		-0.14 (0.66)	0.16 (0.83)	-0.15 (1.14)	-0.09 (0.26)	0.16 (0.15)	-0.15 (0.16)	-0.25	0.40302	0.06
1557	LAMA2	LAMA2	P24043	310	EMIF-AD MBD	MRM	NA		0	0	1			0 (1)	-0.2 (1)	0.12 (0.96)	-0.05 (0.12)	-0.21 (0.11)	0.15 (0.08)	0.16	0.31875	-0.2	0.18151	-0.36	0.01093	-0.13 (1.03)	-0.21 (1.15)	-0.34 (0.72)	-0.21 (0.17)	-0.21 (0.2)	-0.36 (0.24)	0	0.99956	0.15	0.59562	0.15	0.62033	-0.08	0.6082		0.02 (0.9)	0.22 (0.85)	0.05 (1.1)	0.05 (0.21)	0.27 (0.12)	0.03 (0.12)	-0.21	0.38747	0.02
1558	LAMA4	LAMA4	Q16363	272	EMIF-AD MBD	MRM	NA		0	0	0			0 (1)	0.04 (1.05)	0.13 (0.94)	0.03 (0.12)	0.04 (0.12)	0.11 (0.09)	-0.01	0.97369	-0.08	0.61067	-0.08	0.61995	0.16 (1.11)	0.09 (0.87)	-0.36 (1.17)	0.17 (0.18)	0.09 (0.21)	-0.36 (0.28)	0.08	0.77592	0.53	0.11486	0.45	0.20034	-0.26	0.1455		0.09 (1.1)	0.09 (0.98)	0.19 (0.86)	0.1 (0.24)	0.08 (0.13)	0.19 (0.14)	0.02	0.92999	-0.09
1559	LAMA5	LAMA5	O15230	203	EMIF-AD MBD	MRM	NA		0	0	0			0 (1)	0.05 (0.75)	0.22 (0.81)	-0.05 (0.12)	0.05 (0.12)	0.25 (0.09)	-0.1	0.54881	-0.3	0.06489	-0.2	0.19201	0.22 (0.79)	-0.06 (0.58)	-0.19 (0.87)	0.17 (0.17)	-0.08 (0.2)	-0.16 (0.27)	0.25	0.34586	0.33	0.29767	0.09	0.7957	-0.21	0.154		0.33 (0.9)	0.2 (0.69)	0.2 (0.99)	0.35 (0.23)	0.23 (0.11)	0.19 (0.15)	0.12	0.63029	0.16
1560	LAMB1	LAMB1	P07942	310	EMIF-AD MBD	MRM	NA		0	0	1			0 (1)	-0.29 (1.02)	0.05 (0.95)	-0.07 (0.11)	-0.3 (0.11)	0.09 (0.08)	0.23	0.14256	-0.16	0.28527	-0.39	0.00515	-0.14 (1.05)	-0.34 (1.06)	-0.56 (0.89)	-0.21 (0.17)	-0.33 (0.2)	-0.58 (0.24)	0.12	0.63908	0.37	0.20093	0.25	0.42379	-0.18	0.2238		0.07 (1)	0.13 (0.88)	-0.03 (1.02)	0.1 (0.21)	0.18 (0.12)	-0.05 (0.12)	-0.08	0.74003	0.14
1561	LAMB2	LAMB2	P55268	249	ADNI	MRM	0	2	-1	1	1		Decrease	0 (1)	-0.61 (1.22)	0.34 (1.14)	-0.04 (0.15)	-0.68 (0.12)	0.34 (0.1)	0.63	0.00091	-0.38	0.03457	-1.01	0	-0.57 (1.16)	-0.54 (1.26)	-0.78 (1.23)	-0.51 (0.24)	-0.67 (0.16)	-0.9 (0.23)	0.16	0.58069	0.39	0.24998	0.22	0.4251	-0.17	0.3409		0.98 (0.8)	0.42 (1.01)	0.04 (1.33)	0.66 (0.31)	0.42 (0.13)	0.09 (0.17)	0.24	0.47421	0.57
1562	LAMB2	LAMB2	P55268	310	EMIF-AD MBD	MRM	NA	1	-1	0	1			0 (1)	-0.28 (0.91)	0.28 (0.93)	0.04 (0.11)	-0.28 (0.11)	0.26 (0.08)	0.33	0.0337	-0.21	0.1381	-0.54	7e-05	-0.33 (0.77)	-0.14 (1.1)	-0.39 (0.92)	-0.32 (0.16)	-0.14 (0.19)	-0.39 (0.23)	-0.17	0.48697	0.07	0.79699	0.24	0.40995	-0.02	0.8531		0.27 (0.98)	0.29 (0.78)	0.27 (1.06)	0.26 (0.2)	0.29 (0.12)	0.27 (0.12)	-0.02	0.91841	-0.01
1563	LAMC1	LAMC1	P11047	310	EMIF-AD MBD	MRM	NA		0	0	1			0 (1)	-0.1 (0.93)	0.26 (0.94)	0.01 (0.11)	-0.1 (0.11)	0.26 (0.08)	0.11	0.47421	-0.25	0.08368	-0.36	0.00834	0 (0.93)	-0.08 (1.02)	-0.33 (0.78)	-0.01 (0.16)	-0.07 (0.19)	-0.33 (0.23)	0.06	0.80755	0.32	0.25398	0.26	0.38989	-0.15	0.2658		0.34 (0.96)	0.35 (0.84)	0.15 (1.02)	0.34 (0.21)	0.35 (0.12)	0.15 (0.12)	-0.01	0.97654	0.2
1564	LAMC3	LAMC3	Q9Y6N6	94	EMIF-AD MBD	MRM	NA		0	0	0			0 (1)	0.12 (0.75)	-0.11 (1.39)	-0.04 (0.27)	0.12 (0.24)	-0.1 (0.18)	-0.15	0.66608	0.06	0.85222	0.22	0.46298	0.29 (0.8)	-0.09 (0.75)	0.18 (0.65)	0.2 (0.4)	-0.08 (0.39)	0.21 (0.56)	0.27	0.62607	-0.01	0.98971	-0.28	0.68241	-0.12	0.5942		0.4 (0.91)	-0.37 (1.44)	0.04 (1.44)	0.42 (0.5)	-0.34 (0.26)	0.04 (0.29)	0.76	0.19156	0.37
1565	LAMP1	LAMP1	P11279	310	EMIF-AD MBD	MRM	NA		0	1	1			0 (1)	-0.02 (1)	0.36 (0.79)	-0.04 (0.1)	-0.03 (0.1)	0.39 (0.07)	-0.02	0.91274	-0.44	0.00121	-0.42	0.00099	0.12 (1.02)	-0.1 (0.86)	-0.2 (1.14)	0.05 (0.15)	-0.09 (0.17)	-0.2 (0.21)	0.14	0.52853	0.26	0.31303	0.11	0.68054	-0.15	0.3089		0.55 (1.05)	0.32 (0.72)	0.34 (0.76)	0.59 (0.19)	0.35 (0.11)	0.33 (0.11)	0.24	0.27024	0.26
1566	LAMP2	LAMP2	P13473	310	EMIF-AD MBD	MRM	NA		0	1	1			0 (1)	-0.25 (0.86)	0.4 (0.76)	-0.02 (0.1)	-0.25 (0.1)	0.41 (0.07)	0.23	0.09176	-0.43	0.00065	-0.67	0	-0.09 (0.78)	-0.3 (0.81)	-0.51 (1.03)	-0.13 (0.13)	-0.29 (0.16)	-0.51 (0.19)	0.16	0.43624	0.39	0.09894	0.22	0.3747	-0.2	0.1219		0.54 (1.01)	0.38 (0.71)	0.37 (0.72)	0.57 (0.17)	0.39 (0.1)	0.36 (0.1)	0.18	0.37157	0.21
1567	LAMP5	LAMP5	Q9UJQ1	149	EMIF-AD MBD	MRM	NA		0	1	1			0 (1)	-0.42 (0.69)	0.5 (0.98)	-0.05 (0.16)	-0.42 (0.16)	0.52 (0.11)	0.37	0.10357	-0.57	0.00725	-0.95	0	-0.43 (0.76)	-0.16 (0.58)	-0.57 (0.6)	-0.53 (0.21)	-0.17 (0.36)	-0.56 (0.31)	-0.36	0.39751	0.03	0.94552	0.38	0.42313	-0.01	0.9391		1.1 (1.32)	0.46 (0.89)	0.38 (0.97)	1.07 (0.32)	0.51 (0.14)	0.38 (0.17)	0.56	0.11027	0.7
1570	LBP	LBP	P18428	310	EMIF-AD MBD	MRM	NA		0	0	0			0 (1)	0.16 (1.04)	-0.05 (0.96)	0.03 (0.12)	0.17 (0.11)	-0.07 (0.08)	-0.14	0.36754	0.09	0.52484	0.24	0.08864	0.05 (0.97)	0.14 (1.04)	0.43 (1.22)	0.09 (0.17)	0.13 (0.2)	0.43 (0.24)	-0.04	0.88095	-0.34	0.25215	-0.3	0.34588	0.17	0.2687		-0.04 (0.93)	-0.09 (0.94)	-0.01 (1.02)	-0.07 (0.22)	-0.1 (0.12)	-0.01 (0.13)	0.04	0.88099	-0.06
1571	LCAT	LCAT	P04180	310	EMIF-AD MBD	MRM	NA		-1	0	1	Decrease		0 (1)	-0.44 (0.94)	0.06 (0.72)	-0.06 (0.1)	-0.45 (0.1)	0.09 (0.07)	0.39	0.00605	-0.15	0.2361	-0.54	1e-05	-0.24 (0.95)	-0.51 (0.72)	-0.77 (1.12)	-0.29 (0.14)	-0.51 (0.16)	-0.79 (0.19)	0.22	0.30283	0.5	0.03621	0.28	0.27385	-0.27	0.0495	Decrease linear	0.25 (0.95)	0.04 (0.69)	0.02 (0.68)	0.27 (0.17)	0.07 (0.1)	0.01 (0.1)	0.19	0.32932	0.26
1574	LCN2	LCN2	P80188	270	ADNI	RBM	0	2	0	0	0			0 (1)	0.14 (0.96)	0.14 (0.89)	-0.03 (0.11)	0.04 (0.09)	0.11 (0.07)	-0.07	0.63822	-0.14	0.2955	-0.08	0.50795	-0.07 (0.99)	0.21 (0.98)	0.21 (0.9)	-0.02 (0.17)	0.04 (0.12)	0.06 (0.17)	-0.06	0.78449	-0.08	0.75079	-0.02	0.92245	0.04	0.7748		0.4 (0.77)	0.07 (1.01)	0.17 (0.71)	0.09 (0.23)	0.04 (0.1)	0.22 (0.12)	0.05	0.84374	-0.13
1575	LCN2	LCN2	P80188	277	EMIF-AD MBD	MRM	NA	1	0	0	0			0 (1)	0.14 (0.86)	0.04 (0.63)	0.07 (0.1)	0.15 (0.09)	0 (0.07)	-0.08	0.55817	0.07	0.59243	0.15	0.21616	0.08 (1.06)	0.25 (0.7)	0.13 (0.58)	0.18 (0.13)	0.22 (0.15)	0.14 (0.17)	-0.04	0.8363	0.04	0.85142	0.08	0.72519	-0.02	0.8847		0 (0.59)	0.01 (0.66)	0.1 (0.61)	-0.06 (0.16)	-0.04 (0.09)	0.12 (0.09)	-0.01	0.93608	-0.17
1576	LCP1	LCP1	P13796	310	EMIF-AD MBD	MRM	NA		0	0	0	Increase		0 (1)	-0.01 (0.84)	-0.08 (0.7)	0 (0.1)	-0.01 (0.09)	-0.08 (0.07)	0.01	0.93879	0.08	0.5349	0.07	0.57043	-0.18 (0.78)	0.02 (0.99)	0.29 (0.68)	-0.13 (0.13)	0.02 (0.15)	0.3 (0.18)	-0.15	0.44112	-0.43	0.04774	-0.28	0.22845	0.2	0.0975	Increase non-linear	-0.4 (0.62)	0.01 (0.73)	-0.06 (0.66)	-0.42 (0.16)	-0.02 (0.09)	-0.05 (0.09)	-0.4	0.0299	-0.37
1577	LDHA	LDHA	P00338	310	EMIF-AD MBD	MRM	NA		0	1	1	Decrease		0 (1)	-0.17 (0.8)	0.6 (0.9)	0.01 (0.11)	-0.18 (0.1)	0.6 (0.08)	0.19	0.19125	-0.58	2e-05	-0.77	0	0.01 (0.64)	-0.19 (0.82)	-0.52 (1)	0.01 (0.15)	-0.19 (0.18)	-0.52 (0.21)	0.2	0.38855	0.52	0.04243	0.32	0.24044	-0.26	0.0311	Decrease linear	0.56 (1.06)	0.66 (0.83)	0.55 (0.92)	0.57 (0.19)	0.65 (0.11)	0.56 (0.11)	-0.08	0.7137	0.01
1578	LDHAL6A	LDHAL6A	Q6ZMR3	303	EMIF-AD MBD	MRM	NA		0	1	1	Decrease		0 (1)	-0.22 (0.79)	0.62 (0.65)	0 (0.09)	-0.23 (0.09)	0.62 (0.07)	0.23	0.07323	-0.62	0	-0.85	0	-0.05 (0.58)	-0.3 (0.91)	-0.49 (0.94)	-0.06 (0.12)	-0.29 (0.14)	-0.49 (0.17)	0.23	0.2093	0.43	0.03943	0.19	0.3832	-0.21	0.0661	Decrease non-linear	0.69 (0.74)	0.65 (0.59)	0.57 (0.69)	0.7 (0.16)	0.66 (0.09)	0.57 (0.09)	0.04	0.8132	0.13
1579	LDHB	LDHB	P07195	310	EMIF-AD MBD	MRM	NA		-1	1	1	Decrease		0 (1)	-0.29 (0.74)	0.63 (0.71)	0 (0.09)	-0.29 (0.09)	0.64 (0.07)	0.29	0.02955	-0.64	0	-0.93	0	-0.1 (0.65)	-0.37 (0.79)	-0.54 (0.78)	-0.12 (0.12)	-0.37 (0.15)	-0.55 (0.17)	0.25	0.1869	0.43	0.04628	0.17	0.45054	-0.21	0.051	Decrease non-linear	0.7 (0.76)	0.66 (0.67)	0.57 (0.74)	0.71 (0.16)	0.67 (0.09)	0.57 (0.09)	0.04	0.81985	0.14
1586	LEP	LEP	P41159	270	ADNI	RBM	0		0	-1	2			0 (1)	-0.25 (0.91)	-0.39 (1.11)	0.02 (0.12)	-0.08 (0.09)	-0.33 (0.08)	0.1	0.52273	0.34	0.01761	0.25	0.0409	0.11 (0.87)	-0.51 (0.91)	-0.06 (0.83)	0.01 (0.18)	-0.25 (0.13)	0.2 (0.18)	0.26	0.24586	-0.19	0.46365	-0.45	0.03888	0.1	0.4099		-0.95 (0.93)	-0.43 (1.16)	-0.16 (1.03)	-0.65 (0.25)	-0.33 (0.1)	-0.22 (0.13)	-0.32	0.2385	-0.44
1587	LFNG	LFNG	Q8NES3	264	EMIF-AD MBD	MRM	NA		0	1	0			0 (1)	0.05 (0.9)	0.2 (0.93)	-0.09 (0.12)	0.04 (0.11)	0.25 (0.08)	-0.14	0.41674	-0.34	0.02629	-0.21	0.14553	0.3 (0.79)	-0.18 (0.82)	-0.16 (1.11)	0.21 (0.17)	-0.16 (0.2)	-0.17 (0.23)	0.37	0.15649	0.38	0.18214	0.01	0.97865	-0.21	0.1335		0.18 (0.99)	0.41 (0.92)	-0.01 (0.89)	0.22 (0.23)	0.45 (0.12)	-0.02 (0.12)	-0.24	0.35422	0.24
1588	LGALS1	LGALS1	P09382	310	EMIF-AD MBD	MRM	NA		-1	0	1			0 (1)	-0.16 (0.91)	0.34 (0.76)	0.12 (0.1)	-0.15 (0.1)	0.27 (0.07)	0.27	0.04909	-0.15	0.246	-0.42	0.00054	-0.18 (1.04)	-0.13 (0.75)	-0.14 (0.86)	-0.09 (0.14)	-0.13 (0.16)	-0.12 (0.2)	0.04	0.83699	0.03	0.89876	-0.01	0.95667	-0.04	0.7853		0.08 (0.7)	0.38 (0.7)	0.39 (0.84)	0.04 (0.18)	0.32 (0.1)	0.41 (0.1)	-0.28	0.16428	-0.37
1589	LGALS3	LGALS3	P17931	287	EMIF-AD MBD	MRM	NA		0	0	0			0 (1)	0.2 (0.75)	0.1 (0.91)	0 (0.11)	0.2 (0.11)	0.1 (0.08)	-0.2	0.19028	-0.09	0.495	0.1	0.44401	0.25 (0.74)	0.26 (0.75)	0.04 (0.79)	0.25 (0.15)	0.25 (0.19)	0.05 (0.21)	-0.01	0.97061	0.19	0.45123	0.2	0.47059	-0.1	0.3973		0.05 (1.13)	0.16 (0.82)	0.04 (0.93)	0.06 (0.2)	0.16 (0.11)	0.04 (0.12)	-0.1	0.67425	0.03
1590	LGALS3BP	LGALS3BP	Q08380	310	EMIF-AD MBD	MRM	NA		0	0	0			0 (1)	0.08 (0.84)	0.15 (0.7)	-0.05 (0.1)	0.07 (0.09)	0.18 (0.07)	-0.12	0.36025	-0.23	0.05815	-0.11	0.33912	0.16 (1.01)	0.05 (0.67)	-0.06 (0.64)	0.09 (0.13)	0.06 (0.15)	-0.07 (0.18)	0.04	0.85806	0.16	0.46987	0.12	0.60042	-0.07	0.5705		0.22 (0.77)	0.19 (0.66)	0.09 (0.73)	0.25 (0.16)	0.22 (0.09)	0.08 (0.1)	0.03	0.85619	0.17
1592	LGI1	LGI1	O95970	113	EMIF-AD MBD	MRM	NA		0	0	0			0 (1)	0.46 (1.19)	0.05 (1.15)	-0.12 (0.23)	0.41 (0.2)	0.14 (0.16)	-0.53	0.08124	-0.26	0.37436	0.27	0.30448	0.81 (1.16)	-0.23 (1.03)	0.44 (1.24)	0.6 (0.31)	-0.19 (0.41)	0.41 (0.43)	0.79	0.13101	0.19	0.72155	-0.6	0.31764	-0.25	0.3937		-0.33 (1.34)	0.1 (0.9)	0.16 (1.47)	-0.25 (0.38)	0.18 (0.21)	0.18 (0.29)	-0.43	0.33065	-0.43
1593	LGMN	LGMN	Q99538	244	EMIF-AD MBD	MRM	NA		0	0	2			0 (1)	0.24 (1.21)	-0.53 (1.14)	-0.14 (0.15)	0.23 (0.14)	-0.45 (0.11)	-0.36	0.07921	0.31	0.10852	0.68	0.00022	0.23 (1.19)	0.57 (1.38)	-0.14 (0.98)	0.1 (0.22)	0.49 (0.28)	-0.18 (0.3)	-0.39	0.26209	0.28	0.45281	0.67	0.10419	-0.07	0.7054		-0.38 (0.8)	-0.64 (1.23)	-0.46 (1.16)	-0.28 (0.27)	-0.53 (0.16)	-0.49 (0.16)	0.25	0.42709	0.21
1596	LILRA2	LILRA2	Q8N149	192	EMIF-AD MBD	MRM	NA		0	0	0			0 (1)	0.18 (0.81)	-0.11 (1.03)	0.06 (0.14)	0.17 (0.14)	-0.14 (0.1)	-0.11	0.57663	0.2	0.28126	0.31	0.07367	0.27 (0.76)	0.12 (0.78)	0.11 (0.95)	0.34 (0.22)	0.06 (0.24)	0.12 (0.27)	0.28	0.40125	0.22	0.52274	-0.06	0.86796	-0.08	0.5999		-0.04 (1.35)	-0.14 (0.89)	-0.1 (1.06)	-0.06 (0.27)	-0.16 (0.15)	-0.08 (0.15)	0.1	0.7345	0.02
1601	LINGO1	LINGO1	Q96FE5	310	EMIF-AD MBD	MRM	NA		0	1	1	Decrease	Decrease	0 (1)	-0.32 (0.99)	0.19 (0.88)	-0.06 (0.11)	-0.34 (0.1)	0.23 (0.08)	0.28	0.06522	-0.29	0.03724	-0.56	2e-05	-0.1 (0.84)	-0.37 (1.01)	-0.73 (1.15)	-0.19 (0.15)	-0.37 (0.18)	-0.74 (0.22)	0.18	0.45591	0.55	0.03654	0.38	0.18365	-0.29	0.0446	Decrease linear	0.44 (1.14)	0.22 (0.85)	0.07 (0.81)	0.49 (0.19)	0.26 (0.11)	0.05 (0.11)	0.23	0.30184	0.44
1604	LIPA	LIPA	P38571	145	EMIF-AD MBD	MRM	NA		0	0	0		Increase	0 (1)	0.16 (0.83)	-0.05 (1.07)	-0.22 (0.18)	0.12 (0.17)	0.06 (0.11)	-0.34	0.16846	-0.28	0.20025	0.06	0.7888	0.16 (0.74)	0.14 (1.09)	0.23 (0.47)	-0.07 (0.27)	0.05 (0.27)	0.32 (0.39)	-0.13	0.73598	-0.39	0.41134	-0.26	0.58252	0.1	0.6584		-0.15 (0.89)	-0.35 (1.08)	0.39 (0.98)	-0.03 (0.3)	-0.32 (0.15)	0.42 (0.18)	0.29	0.38853	-0.45
1605	LMAN1	LMAN1	P49257	300	EMIF-AD MBD	MRM	NA		0	1	1			0 (1)	-0.34 (1.13)	0.41 (1.06)	-0.04 (0.13)	-0.35 (0.12)	0.44 (0.09)	0.3	0.08452	-0.48	0.00311	-0.79	0	-0.25 (0.95)	-0.32 (1.14)	-0.58 (1.47)	-0.29 (0.19)	-0.32 (0.23)	-0.59 (0.26)	0.03	0.93329	0.3	0.36438	0.27	0.4443	-0.17	0.3212		0.5 (1.65)	0.42 (0.91)	0.38 (0.96)	0.52 (0.24)	0.45 (0.14)	0.37 (0.14)	0.07	0.80519	0.15
1606	LMAN2	LMAN2	Q12907	310	EMIF-AD MBD	MRM	NA		-1	1	1	Decrease		0 (1)	-0.35 (0.83)	0.34 (0.7)	0.02 (0.1)	-0.35 (0.09)	0.33 (0.07)	0.38	0.00484	-0.31	0.01144	-0.69	0	-0.12 (0.83)	-0.51 (0.78)	-0.6 (0.82)	-0.12 (0.13)	-0.51 (0.15)	-0.59 (0.18)	0.39	0.04693	0.48	0.03003	0.08	0.72167	-0.25	0.0416	Decrease linear	0.46 (0.76)	0.39 (0.64)	0.25 (0.75)	0.47 (0.16)	0.38 (0.09)	0.26 (0.09)	0.09	0.6192	0.21
1609	LOX	LOX	P28300	152	EMIF-AD MBD	MRM	NA		0	0	0			0 (1)	-0.18 (0.94)	0.3 (1.18)	0.18 (0.2)	-0.18 (0.17)	0.23 (0.12)	0.36	0.17922	-0.05	0.83025	-0.41	0.05603	-0.4 (0.98)	-0.1 (0.94)	0.08 (0.88)	-0.25 (0.29)	-0.11 (0.31)	0.04 (0.37)	-0.15	0.72978	-0.29	0.54165	-0.14	0.76768	0.06	0.7528		0.27 (1.66)	0.4 (0.94)	0.16 (1.34)	0.26 (0.35)	0.37 (0.17)	0.14 (0.21)	-0.12	0.76401	0.11
1610	LPA	LPA	P08519	270	ADNI	RBM	0		0	0	0			0 (1)	0.08 (0.97)	0.04 (0.93)	-0.01 (0.13)	0.09 (0.1)	0.05 (0.09)	-0.1	0.55411	-0.06	0.7015	0.04	0.77563	-0.06 (1.14)	0.13 (0.88)	0.11 (1.02)	-0.05 (0.2)	0.1 (0.14)	0.08 (0.2)	-0.15	0.54682	-0.13	0.63924	0.01	0.95077	0.1	0.5119		0.54 (1.1)	-0.13 (0.82)	0.19 (1)	0.46 (0.27)	-0.14 (0.11)	0.2 (0.14)	0.59	0.04621	0.26
1612	LPL	LPL	P06858	135	EMIF-AD MBD	MRM	NA		0	0	1			0 (1)	-0.31 (0.82)	0.07 (0.64)	-0.1 (0.14)	-0.32 (0.13)	0.12 (0.1)	0.22	0.25474	-0.22	0.23011	-0.44	0.00909	-0.33 (0.83)	-0.47 (1.02)	-0.14 (0.68)	-0.39 (0.17)	-0.47 (0.25)	-0.14 (0.22)	0.07	0.80701	-0.26	0.36725	-0.33	0.32643	0.08	0.6334		-0.12 (0.51)	0.23 (0.7)	-0.04 (0.57)	-0.1 (0.27)	0.27 (0.14)	-0.05 (0.13)	-0.37	0.213	-0.05
1614	LRG1	LRG1	P02750	249	ADNI	MRM	1	2	0	0	0			0 (1)	0.18 (1.25)	0.07 (0.98)	-0.03 (0.15)	0.14 (0.11)	0.08 (0.1)	-0.17	0.36223	-0.1	0.55729	0.07	0.65486	0.07 (1.03)	0.11 (1.24)	0.43 (1.46)	0.09 (0.24)	0.04 (0.16)	0.37 (0.23)	0.05	0.85352	-0.28	0.40585	-0.33	0.23992	0.17	0.3817		0.46 (0.7)	0 (0.92)	0.08 (1.12)	0.27 (0.31)	0.01 (0.13)	0.1 (0.17)	0.26	0.43656	0.17
1615	LRG1	LRG1	P02750	310	EMIF-AD MBD	MRM	NA	1	1	0	2			0 (1)	0.56 (1.18)	0.04 (0.96)	0.07 (0.12)	0.56 (0.12)	0 (0.09)	-0.49	0.00337	0.06	0.69301	0.55	0.00017	0.41 (0.92)	0.61 (1.24)	0.8 (1.54)	0.47 (0.18)	0.6 (0.21)	0.82 (0.25)	-0.13	0.63032	-0.35	0.25426	-0.22	0.50947	0.16	0.3614		0.01 (0.92)	-0.05 (1.01)	0.15 (0.92)	-0.01 (0.23)	-0.09 (0.13)	0.16 (0.13)	0.08	0.77172	-0.17
1618	LRP1	LRP1	Q07954	310	EMIF-AD MBD	MRM	NA		0	1	1			0 (1)	-0.17 (0.9)	0.43 (0.82)	-0.04 (0.1)	-0.18 (0.1)	0.46 (0.07)	0.14	0.33665	-0.5	0.00022	-0.64	0	-0.05 (0.9)	-0.22 (0.86)	-0.38 (0.95)	-0.1 (0.15)	-0.21 (0.17)	-0.38 (0.21)	0.11	0.62195	0.28	0.26438	0.17	0.53043	-0.17	0.2121		0.46 (0.93)	0.42 (0.78)	0.43 (0.84)	0.49 (0.19)	0.45 (0.11)	0.42 (0.11)	0.04	0.85985	0.07
1619	LRP11	LRP11	Q86VZ4	310	EMIF-AD MBD	MRM	NA		-1	1	1	Decrease		0 (1)	-0.42 (0.8)	0.2 (0.83)	-0.04 (0.1)	-0.43 (0.1)	0.23 (0.07)	0.39	0.00609	-0.28	0.0331	-0.66	0	-0.21 (0.65)	-0.46 (0.95)	-0.83 (0.7)	-0.26 (0.14)	-0.45 (0.16)	-0.83 (0.19)	0.19	0.37098	0.57	0.01724	0.38	0.13922	-0.3	0.0093	Decrease linear	0.43 (0.95)	0.19 (0.81)	0.13 (0.81)	0.47 (0.18)	0.22 (0.1)	0.13 (0.1)	0.25	0.22135	0.34
1620	LRP1B	LRP1B	Q9NZR2	253	EMIF-AD MBD	MRM	NA		0	0	0			0 (1)	-0.21 (0.83)	0.03 (0.83)	-0.04 (0.11)	-0.21 (0.11)	0.06 (0.08)	0.17	0.28054	-0.1	0.50908	-0.27	0.05382	-0.1 (0.84)	-0.14 (0.78)	-0.56 (0.85)	-0.11 (0.16)	-0.16 (0.19)	-0.57 (0.24)	0.04	0.8635	0.46	0.11082	0.41	0.17988	-0.23	0.1072		0.41 (1.1)	0.03 (0.77)	-0.07 (0.81)	0.42 (0.22)	0.04 (0.11)	-0.07 (0.12)	0.39	0.11455	0.49
1622	LRP8	LRP8	Q14114	201	EMIF-AD MBD	MRM	NA		0	0	1			0 (1)	-0.36 (1.09)	-0.03 (0.74)	-0.03 (0.14)	-0.35 (0.12)	-0.02 (0.1)	0.32	0.08821	-0.01	0.93543	-0.33	0.03289	-0.37 (0.74)	-0.18 (1.57)	-0.68 (0.69)	-0.39 (0.18)	-0.18 (0.2)	-0.68 (0.28)	-0.22	0.42606	0.29	0.38189	0.51	0.14719	-0.09	0.6596		-0.14 (0.94)	0.06 (0.72)	-0.1 (0.71)	-0.1 (0.27)	0.07 (0.13)	-0.1 (0.14)	-0.17	0.56006	0
1623	LRRC4	LRRC4	Q9HBW1	310	EMIF-AD MBD	MRM	NA		0	1	1	Decrease		0 (1)	-0.23 (0.86)	0.39 (0.71)	-0.02 (0.1)	-0.24 (0.09)	0.41 (0.07)	0.22	0.10286	-0.43	0.00056	-0.64	0	0.01 (0.78)	-0.38 (0.82)	-0.52 (1.01)	-0.03 (0.13)	-0.38 (0.15)	-0.52 (0.18)	0.35	0.08367	0.49	0.02877	0.14	0.5546	-0.28	0.0293	Decrease linear	0.4 (0.83)	0.45 (0.7)	0.32 (0.68)	0.43 (0.16)	0.46 (0.09)	0.32 (0.09)	-0.04	0.85087	0.11
1624	LRRC4B	LRRC4B	Q9NT99	249	ADNI	MRM	1	2	-1	1	1			0 (0.92)	-0.45 (1.24)	0.69 (0.97)	-0.01 (0.15)	-0.45 (0.12)	0.7 (0.1)	0.44	0.02107	-0.71	9e-05	-1.15	0	-0.14 (1.23)	-0.48 (1.27)	-0.68 (1.16)	-0.14 (0.24)	-0.49 (0.17)	-0.68 (0.24)	0.35	0.24049	0.53	0.11716	0.19	0.51327	-0.23	0.2288		0.88 (0.59)	0.8 (0.88)	0.47 (1.14)	0.79 (0.31)	0.82 (0.14)	0.48 (0.17)	-0.03	0.92225	0.3
1625	LRRC4B	LRRC4B	Q9NT99	310	EMIF-AD MBD	MRM	NA	1	-1	1	1			0 (1)	-0.31 (0.93)	0.33 (0.77)	-0.03 (0.1)	-0.32 (0.1)	0.36 (0.07)	0.28	0.04231	-0.39	0.00246	-0.67	0	-0.09 (0.82)	-0.44 (0.85)	-0.57 (1.17)	-0.16 (0.14)	-0.43 (0.16)	-0.57 (0.2)	0.27	0.21505	0.41	0.08576	0.14	0.57321	-0.23	0.09		0.38 (0.87)	0.38 (0.74)	0.26 (0.76)	0.42 (0.18)	0.41 (0.1)	0.25 (0.1)	0.01	0.95726	0.17
1627	LRRN1	LRRN1	Q6UXK5	221	EMIF-AD MBD	MRM	NA		0	0	0			0 (1)	-0.29 (0.8)	-0.05 (0.79)	-0.05 (0.13)	-0.29 (0.11)	-0.03 (0.08)	0.24	0.16368	-0.03	0.87176	-0.26	0.06005	-0.27 (0.95)	-0.35 (0.72)	-0.22 (0.34)	-0.33 (0.16)	-0.34 (0.18)	-0.19 (0.27)	0.01	0.97963	-0.14	0.65388	-0.15	0.65136	-0.01	0.9602		-0.15 (0.88)	0.03 (0.79)	-0.14 (0.76)	-0.15 (0.23)	0.06 (0.11)	-0.15 (0.12)	-0.2	0.42548	0
1628	LRRTM2	LRRTM2	O43300	277	EMIF-AD MBD	MRM	NA		-1	0	1	Decrease		0 (1)	-0.4 (0.88)	0.2 (0.91)	-0.01 (0.11)	-0.41 (0.11)	0.21 (0.08)	0.41	0.00976	-0.21	0.14798	-0.62	1e-05	-0.21 (0.82)	-0.43 (0.88)	-0.8 (0.9)	-0.24 (0.16)	-0.44 (0.19)	-0.8 (0.23)	0.2	0.40441	0.56	0.04235	0.36	0.23044	-0.29	0.0315	Decrease linear	0.31 (0.98)	0.3 (0.82)	0.03 (0.98)	0.35 (0.2)	0.31 (0.11)	0.03 (0.12)	0.03	0.87821	0.31
1629	LRRTM4	LRRTM4	Q86VH4	130	EMIF-AD MBD	MRM	NA		0	0	0			0 (1)	-0.13 (0.9)	0.35 (1.05)	0.05 (0.18)	-0.11 (0.18)	0.31 (0.14)	0.16	0.51292	-0.27	0.27276	-0.43	0.06545	0.03 (1.02)	-0.3 (0.84)	-0.19 (0.81)	0.18 (0.29)	-0.26 (0.29)	-0.2 (0.45)	0.44	0.27522	0.38	0.47777	-0.06	0.90987	-0.23	0.3451		0.31 (1.23)	0.35 (0.9)	0.39 (1.2)	0.27 (0.32)	0.3 (0.18)	0.36 (0.23)	-0.03	0.93707	-0.1
[truncated: 713 more rows]
[truncated: 61 more columns]

## Sheet: Data_S3a. GO-BP processes
Data S3a. Full list of GO biological processes associated with proteins that differ according to group or clinical stage.
[truncated: 6,677 more rows]

## Sheet: Data_S3b_ Syngo
Data S3b. SynGO enriched synaptic cellular component( CC) and biological processes (BP) that differ according to group
[truncated: 1,137 more rows]

## Sheet: Data_S4a_AD_PGRS
Data S4a. Estimated marginal means of AD GWAS-based polygenic risk scores in controls, AD individuals with increased t-tau and AD individuals with normal t-tau
[truncated: 49 more rows]
[truncated: 14 more columns]

[truncated: 7 more sheets: Data_S4b_SNPS, Data_S4c_MAGMA_gene_score, Data_S4d_MAGMA_geneset_score, Data_S5a_GRS_CSF correlation, Data_S5b_GMNC,APOE  CSF correla, Data_S5c_GO-BP GMNC-CSF cor, Data_S6_imaging]
